# Supplementary material for: Cu(ii)-catalyzed [4 + 1] and [4 + 3] annulation reactions: a modular approach to N-aryl/alkyl substituted 2,5-diamidopyrroles and diazepines
Source: Royal Society of Chemistry journal article supplement (doi:10.1039/d2ob01458k), 2022-01-01

## **Cu(II)-Catalyzed [4 + 1] and [4 + 3] Annulation Reactions: A Modular Approach to N-Aryl/Alkyl Substituted 2,5-di-Amidopyrroles and Diazepines**

Shivani Choudhary,<sup>†±</sup> Gayyur,<sup>†</sup> and Nayan Ghosh<sup>†± \*</sup>

<sup>†</sup>*Medicinal & Process Chemistry Division, CSIR-Central Drug Research Institute, Lucknow-226031, U.P., India*

<sup>±</sup>*Academy of Scientific and Innovative Research (AcSIR), Ghaziabad-201002, India*

E-mail: [nayan.ghosh@cdri.res.in](mailto:nayan.ghosh@cdri.res.in)

### **SUPPORTING INFORMATION**

| <b>Table of Contents</b>                                                                                              | <b>Page</b> |
|-----------------------------------------------------------------------------------------------------------------------|-------------|
| General Experimental                                                                                                  | S2          |
| Materials                                                                                                             | S2          |
| Structure of primary amines ( <b>1</b> ), ynamide-derived buta-1,3-diynes ( <b>2</b> ) and tentative reaction pathway | S3          |
| Optimization Reaction, Experimental Procedures, Spectral, Analytical data                                             | S4-S30      |
| References                                                                                                            | S30         |
| Spectra                                                                                                               | S31-S110    |

## General Experimental

All the reactions were performed in an oven-dried Schlenk flask under an argon atmosphere. Unless otherwise noted, all the reagents and intermediates were obtained commercially and used without purification. Dichloromethane ( $\text{CH}_2\text{Cl}_2$ ), acetonitrile, ethyl acetate, acetone and dichloroethane (DCE) were distilled over  $\text{CaH}_2$ . THF, toluene, 1,4-dioxane was freshly distilled over sodium/benzophenone ketyl under dry nitrogen. TMEDA was distilled over KOH. Column chromatography was performed using silica gel (100-200 Mesh) eluting with hexanes and ethyl acetate mixture. Flash column chromatography was performed using silica gel (230-400 Mesh) eluting with hexanes and ethyl acetate mixture. Thin layer chromatography (TLC) was performed on silica gel GF254 plates. Visualization of spots on TLC plate was accomplished with UV light (254 nm) and staining over  $\text{I}_2$  chamber or an aqueous alkaline  $\text{KMnO}_4$  solution followed by heating.

Proton and carbon nuclear magnetic resonance spectra ( $^1\text{H}$  NMR,  $^{13}\text{C}$  NMR and  $^{19}\text{F}$  NMR) were recorded on a Bruker Avance 400 ( $^1\text{H}$  NMR, 400 MHz;  $^{13}\text{C}$  NMR, 101 MHz;  $^{19}\text{F}$  NMR, 376 MHz) spectrometer or some cases on a Bruker Avance 500 ( $^1\text{H}$  NMR, 500 MHz;  $^{13}\text{C}$  NMR, 125 MHz) spectrometer, having solvent resonance as internal standard ( $^1\text{H}$  NMR,  $\text{CDCl}_3$  at 7.26 ppm;  $^{13}\text{C}$  NMR,  $\text{CDCl}_3$  at 77.0 ppm). Few cases tetramethylsilane (TMS) at 0.00 ppm was used as reference standard. All the catalysts used in this reaction were procured directly from commercial sources. Data for  $^1\text{H}$  NMR are reported as follows: chemical shift (ppm), multiplicity (s = singlet; br s = broad singlet; d = doublet; br d = broad doublet, t = triplet; br t = broad triplet; q = quartet; m = multiplet), coupling constants,  $J$ , in (Hz), and integration. Data for  $^{13}\text{C}$  NMR,  $^{19}\text{F}$  NMR were reported in terms of chemical shift (ppm). IR spectra were recorded on FT/IR-5300 spectrometer and reported in  $\text{cm}^{-1}$ . High resolution mass spectra were obtained in ESI mode. Melting points were determined by electro-thermal heating and are uncorrected.

All primary amines (**1a-1z**) were purchased from commercial source and used as it is for this reaction. However, ynamide-derived buta-1,3-diynes (**2a-2e**) were prepared following literature procedures.<sup>1</sup>

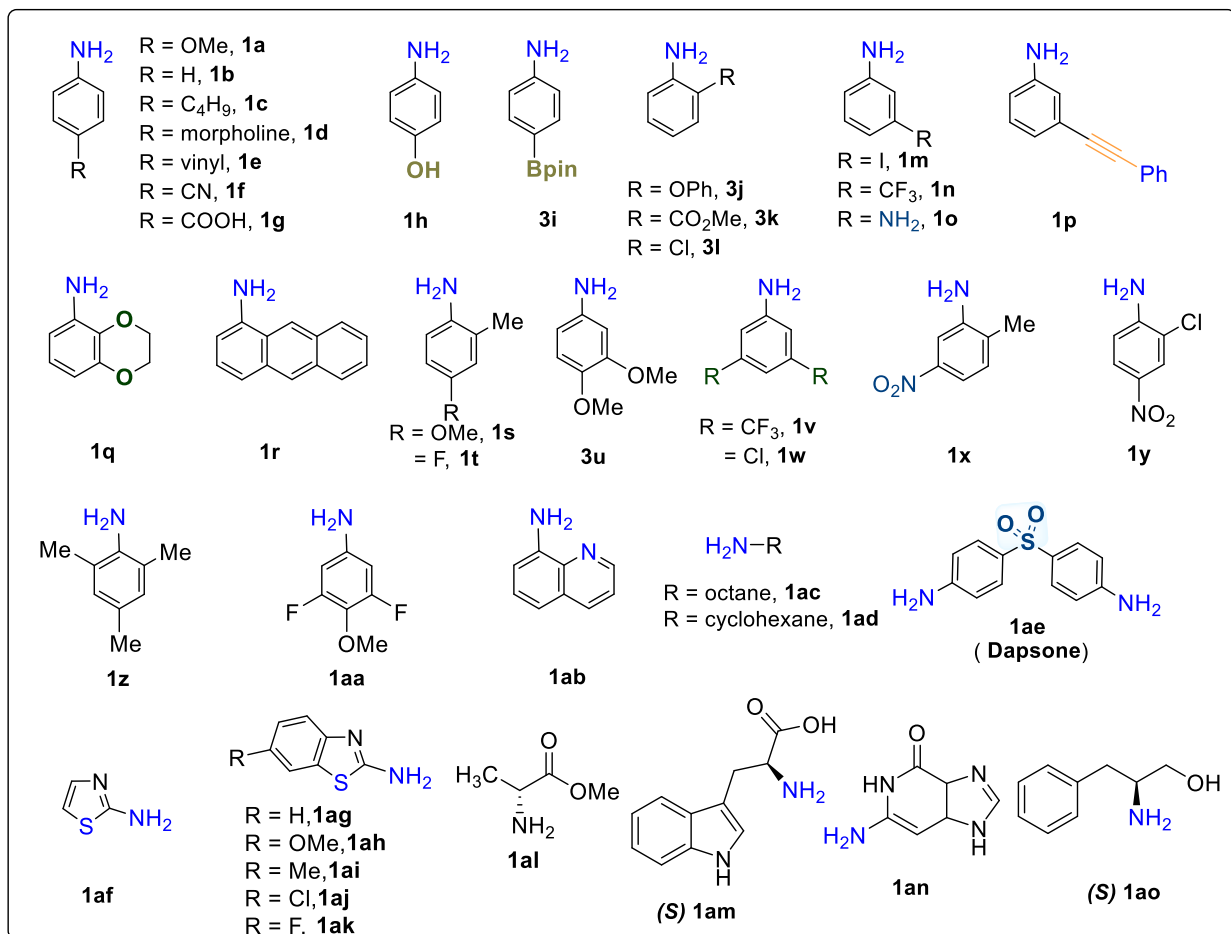

**Figure S1.** Different primary amines (**1**) employed in [4+1] and [4+3] annulation.

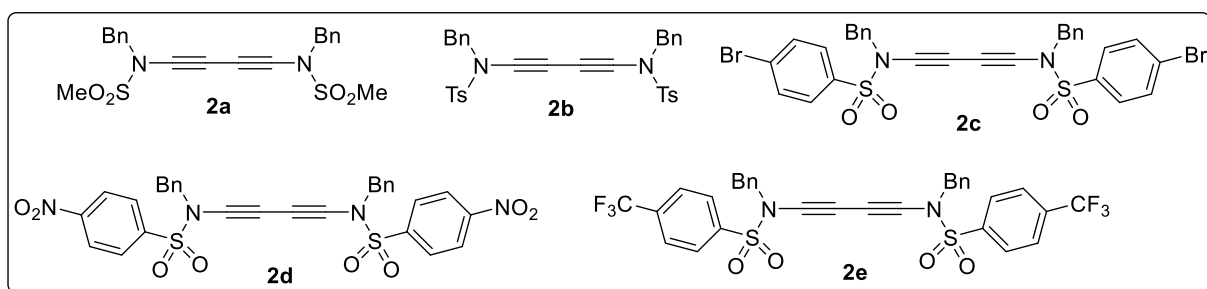

**Figure S2.** Different ynamide-derived buta-1,3-diynes (**2**) employed in [4+1] and [4+3] annulation.

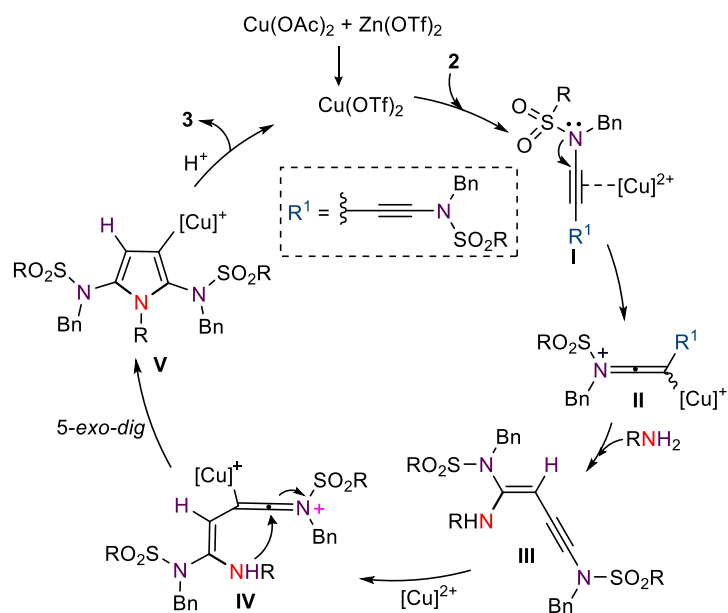

**Scheme S1.** Tentative reaction pathway.

**Table S1.** Optimization of reaction conditions between 2-aminothiazole and **2a**<sup>a</sup>

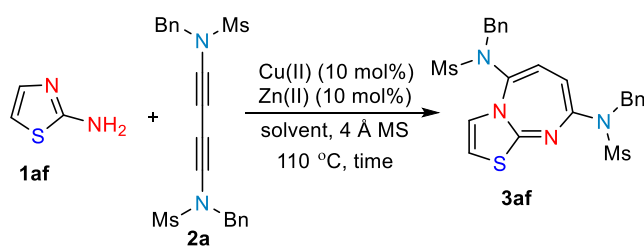

| Entry          | Catalyst/Additive                          | Solvent/time (h) | Yield (%) <sup>b</sup> |
|----------------|--------------------------------------------|------------------|------------------------|
| 1              | Cu(OTf) <sub>2</sub> /Zn(OTf) <sub>2</sub> | 1,4-dioxane/3 h  | 20                     |
| 2              | CuCl <sub>2</sub> /Zn(OTf) <sub>2</sub>    | 1,4-dioxane/3 h  | Trace                  |
| 3              | Cu(OAc) <sub>2</sub> /Zn Dust              | 1,4-dioxane/12 h | 10                     |
| 4              | Cu(OAc) <sub>2</sub> /ZnCl <sub>2</sub>    | 1,4-dioxane/12 h | 28                     |
| 5              | Cu(OAc) <sub>2</sub> /Zn(OAc) <sub>2</sub> | 1,4-dioxane/12 h | 26                     |
| 6              | Cu(OAc) <sub>2</sub> /Zn(OTf) <sub>2</sub> | Toluene/3 h      | 15                     |
| 7 <sup>c</sup> | Cu(OAc) <sub>2</sub> /Zn(OTf) <sub>2</sub> | THF/12 h         | 26                     |
| 8              | Cu(OAc) <sub>2</sub> /Zn(OTf) <sub>2</sub> | 1,2-DCE/12 h     | 25                     |

<sup>a</sup>Reaction conditions: **1af** (0.21 mmol), **2a** (0.19 mmol), solvent (2.0 mL), and 4 Å MS (15 mg) under argon. <sup>b</sup><sup>1</sup>H NMR yield of crude reaction mixture and 1,3,5-trimethoxybenzene as an internal standard. <sup>c</sup>Reaction temperature 80 °C.

### General procedure for [4+1] annulation (GP-1):

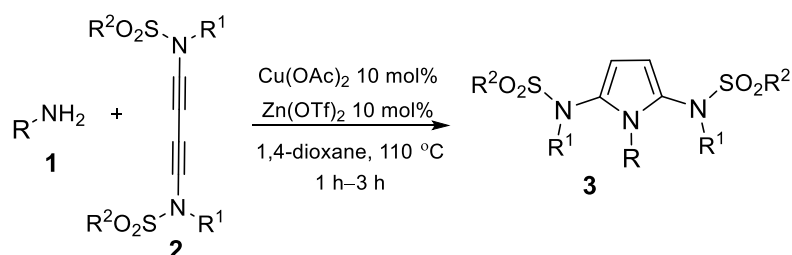

Initially required reagents such as **1** (0.21 mmol), **2** (0.19 mmol),  $Cu(OAc)_2$  (0.019 mmol), and  $Zn(OTf)_2$  (0.019 mmol) were taken in an oven-dried 15 mL Schlenk flask along with 4 Å MS (15 mg) and anhydrous 1,4-dioxane (2.0 mL) was introduced into the flask under argon atmosphere at room temperature. Upon stirring the reaction mixture for 5 min at RT, the Schlenk flask was placed in an oil bath at 110 °C and stirring continued for 1 h–3 h. The progress of the reaction was routinely monitored by TLC. The reaction mixture was cooled to room temperature after completion of reaction. Next, the solution was diluted with dichloromethane (5.0 mL), and filtered through a small pad of Celite. The filtrate was concentrated and the residue was purified through silica gel column chromatography to obtain **3**.

### *N,N'*-(1-(4-Methoxyphenyl)-1*H*-pyrrole-2,5-diyl)bis(*N*-benzylmethansulfonamide) (**3a**)

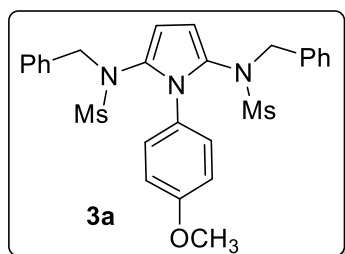

Following the general procedure GP-1, product **3a** (92 mg) was obtained in 88% yield as yellow solid; mp = 211–213 °C;  $R_f$  = 0.41 (7:3 hexane/EtOAc); [Silica, UV and  $I_2$ ];  $^1H$  NMR (400 MHz,  $CDCl_3$ )  $\delta$  7.32–7.23 (m, 8H), 7.09–7.07 (m, 4H), 6.70 (d,  $J$  = 7.2 Hz, 2H), 6.03 (s, 2H), 4.34 (s, 4H), 3.82 (s, 3H), 2.75 (s, 6H);  $^{13}C$  NMR (125 MHz,  $CDCl_3$ )  $\delta$  159.4, 135.0, 130.5, 129.7, 128.5, 128.2, 127.4, 127.3, 113.4, 106.0, 56.2, 55.3, 39.2; IR (Neat)  $\nu_{max}$  3402, 2926, 1330, 1153, 830  $cm^{-1}$ ; HRMS (ESI) for  $C_{27}H_{30}N_3O_5S_2$  ( $M+H$ ) $^+$ : calcd 540.1627, found 540.1630.

In scale-up reaction, a mixture of **1a** (1.3 mmol, 162 mg), **2a** (1.2 mmol, 500 mg),  $Zn(OTf)_2$  (0.12 mmol, 44 mg),  $Cu(OAc)_2$  (0.12 mmol, 22 mg) and 4 Å MS (50 mg) was stirred in

anhydrous 1,4-dioxane (7.0 mL). After completion, the crude residue was purified to obtain pure **3a** (587 mg) in 90% yield.

***N,N'*-(1-Phenyl-1*H*-pyrrole-2,5-diyl)bis(*N*-benzylmethanesulfonamide) (**3b**)**

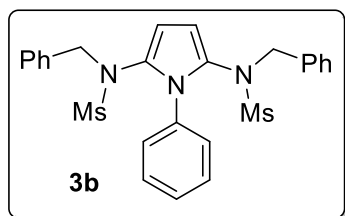

Following the general procedure GP-1, product **3b** (92 mg) was obtained in 94% yield as pale yellow solid; mp = 160–162 °C;  $R_f$  = 0.47 (3:2 hexane/EtOAc); [Silica, UV and I<sub>2</sub>]; **<sup>1</sup>H NMR (500 MHz, CDCl<sub>3</sub>)**  $\delta$  7.31–7.18 (m, 10H), 7.05 (d,  $J$  = 7.0 Hz, 4H), 6.84 (s, 1H), 6.03 (s, 2H), 4.32 (s, 4H), 2.72 (s, 6H); **<sup>13</sup>C NMR (125 MHz, CDCl<sub>3</sub>)**  $\delta$  134.9, 134.8, 129.7, 129.4, 128.5, 128.4, 128.3, 127.2, 106.2, 56.3, 39.3; **IR (Neat)**  $\nu_{\max}$  3394, 2931, 1335, 1154, 757 cm<sup>-1</sup>; HRMS (ESI) for C<sub>26</sub>H<sub>28</sub>N<sub>3</sub>O<sub>4</sub>S<sub>2</sub> (M+H)<sup>+</sup>: calcd 510.1521, found 510.1517.

***N,N'*-(1-(4-Butylphenyl)-1*H*-pyrrole-2,5-diyl)bis(*N*-benzylmethanesulfonamide) (**3c**)**

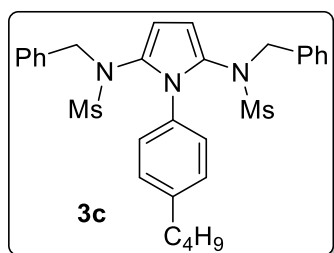

Following the general procedure GP-1, product **3c** (96 mg) was obtained in 89% yield as colorless solid; mp = 177–179 °C;  $R_f$  = 0.46 (1:1 hexane/EtOAc); [Silica, UV and I<sub>2</sub>]; **<sup>1</sup>H NMR (500 MHz, CDCl<sub>3</sub>)**  $\delta$  7.30–7.22 (m, 7H), 7.07 (d,  $J$  = 7.0 Hz, 4H), 7.01 (d,  $J$  = 8.0 Hz, 2H), 6.77 (brs, 1H), 6.01 (s, 2H), 4.33 (s, 4H), 2.71 (s, 6H), 2.61 (t,  $J$  = 7.5 Hz, 2H), 1.64–1.58 (m, 2H), 1.41–1.35 (m, 2H), 0.96 (t,  $J$  = 7.5 Hz, 3H); **<sup>13</sup>C NMR (125 MHz, CDCl<sub>3</sub>)**  $\delta$  143.3, 135.0, 132.3, 129.7, 129.1, 128.5, 128.3, 128.2, 127.1, 106.2, 56.2, 39.4, 35.2, 33.4, 22.4, 13.9; **IR (Neat)**  $\nu_{\max}$  3393, 2926, 1607, 1383, 1055, 767 cm<sup>-1</sup>; HRMS (ESI) for C<sub>30</sub>H<sub>36</sub>N<sub>3</sub>O<sub>4</sub>S<sub>2</sub> (M+H)<sup>+</sup>: calcd 566.2147, found 566.2146.

***N,N'*-(1-(4-Morpholinophenyl)-1*H*-pyrrole-2,5-diyl)bis(*N*-benzylmethanesulfonamide) (**3d**)**

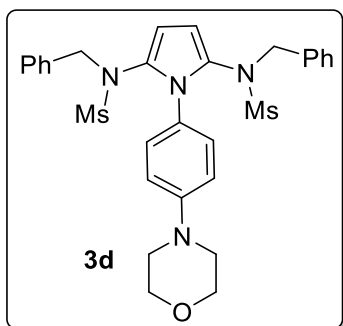

Following the general procedure GP-1, product **3d** (64 mg) was obtained in 65% yield as orange solid; mp = 184–186 °C;  $R_f$  = 0.41 (2:3 hexane/EtOAc); [Silica, UV and  $I_2$ ];  **$^1H$  NMR (400 MHz,  $CDCl_3$ )**  $\delta$  7.29–7.27 (m, 4H), 7.26–7.23 (m, 4H), 7.09 (dd,  $J$  = 1.6, 8.0 Hz, 4H), 6.70 (d,  $J$  = 8.4 Hz, 2H), 5.99 (s, 2H), 4.34 (s, 4H), 3.88 (t,  $J$  = 4.8 Hz, 4H), 3.19 (t,  $J$  = 4.8 Hz, 4H), 2.74 (s, 6H);  **$^{13}C$  NMR (101 MHz,  $CDCl_3$ )**  $\delta$  150.9, 135.1, 130.0, 129.7, 128.5, 128.2, 127.2, 126.3, 114.5, 106.0, 66.8, 56.1, 48.7, 39.5; **IR (Neat)**  $\nu_{max}$  3393, 2925, 1758, 1518, 1338, 1152, 1059, 758  $cm^{-1}$ ; HRMS (ESI) for  $C_{30}H_{35}N_4O_5S_2$  ( $M+H$ )<sup>+</sup>: calcd 595.2049, found 595.2048.

***N,N'*-(1-(4-Vinylphenyl)-1*H*-pyrrole-2,5-diyl)bis(*N*-benzylmethanesulfonamide) (3e)**

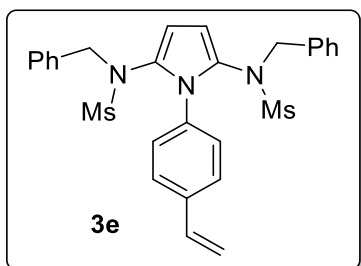

Following the general procedure GP-1, product **3e** (70 mg) was obtained in 68% yield as pale yellow solid; mp = 236–238 °C;  $R_f$  = 0.41 (7:3 hexane/EtOAc); [Silica, UV and  $I_2$ ];  **$^1H$  NMR (500 MHz,  $CDCl_3$ )**  $\delta$  7.30–7.22 (m, 9H), 7.06 (d,  $J$  = 7.0 Hz, 4H), 6.81 (brs, 1H), 6.69 (dd,  $J$  = 7.0 Hz, 1H), 6.05 (s, 2H), 5.76 (d,  $J$  = 17.5, 1H), 5.31 (d,  $J$  = 10.5, 1H), 4.33 (s, 4H), 2.76 (s, 6H);  **$^{13}C$  NMR (125 MHz,  $CDCl_3$ )**  $\delta$  137.5, 136.0, 134.9, 134.1, 129.6, 129.4, 128.5, 128.2, 127.2, 126.0, 115.0, 106.1, 56.3, 39.3; **IR (Neat)**  $\nu_{max}$  3386, 2924, 1624, 1383, 1062, 693  $cm^{-1}$ ; HRMS (ESI) for  $C_{28}H_{30}N_3O_4S_2$  ( $M+H$ )<sup>+</sup>: calcd 536.1678, found 536.1668.

***N,N'*-(1-(4-Cyanophenyl)-1*H*-pyrrole-2,5-diyl)bis(*N*-benzylmethanesulfonamide) (3f)**

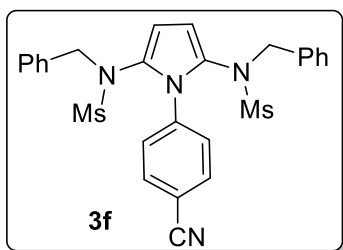

Following the general procedure GP-1, product **3f** (85 mg) was obtained in 83% yield as pale yellow solid; mp = 259–261 °C;  $R_f$  = 0.40 (EtOAc); [Silica, UV and  $I_2$ ];  $^1\text{H NMR}$  (500 MHz,  $\text{CDCl}_3$ )  $\delta$  7.29 (t,  $J$  = 9.5 Hz, 5H), 7.18 (t,  $J$  = 7.5 Hz, 4H), 6.93 (d,  $J$  = 7.0 Hz, 5H), 6.21 (s, 2H), 4.32 (brs, 4H), 2.91 (s, 6H);  $^{13}\text{C NMR}$  (101 MHz,  $d_6$ -DMSO)  $\delta$  139.0, 135.1, 131.6, 130.4, 129.7, 128.7, 128.3, 127.8, 118.9, 110.5, 106.4, 56.7, 39.4; **IR** (Neat)  $\nu_{\text{max}}$  3401, 2926, 1384, 1052, 765  $\text{cm}^{-1}$ ; HRMS (ESI) for  $\text{C}_{27}\text{H}_{27}\text{N}_4\text{O}_4\text{S}_2$  ( $\text{M}+\text{H}$ ) $^+$ : calcd 535.1474, found 535.1466.

#### 4-(2,5-Bis(*N*-benzylmethanesulfonamido)-1*H*-pyrrol-1-yl)benzoic acid (**3g**)

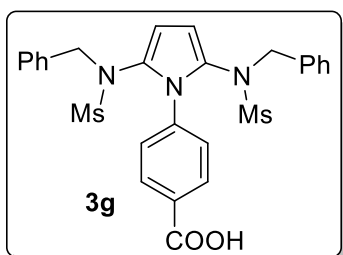

Following the general procedure GP-1, product **3g** (24 mg) was obtained in 92% yield as pale yellow solid; mp = 191–193 °C;  $R_f$  = 0.4 (EtOAc); [Silica, UV and  $I_2$ ];  $^1\text{H NMR}$  (400 MHz,  $d_6$ -DMSO)  $\delta$  13.01 (brs, 1H), 7.51 (d,  $J$  = 6.4 Hz, 2H), 7.27 (d,  $J$  = 7.2 Hz, 2H), 7.18 (t,  $J$  = 7.2 Hz, 5H), 6.88 (d,  $J$  = 7.2 Hz, 5H), 6.41 (s, 2H), 4.35 (brs, 4H), 3.01 (s, 6H);  $^{13}\text{C NMR}$  (101 MHz,  $d_6$ -DMSO)  $\delta$  167.3, 138.9, 135.3, 130.2, 129.8, 128.7, 128.6, 128.3, 127.6, 106.3, 56.4, 37.8; **IR** (Neat)  $\nu_{\text{max}}$  3388, 2923, 1617, 1063, 767  $\text{cm}^{-1}$ ; HRMS (ESI) for  $\text{C}_{27}\text{H}_{31}\text{N}_4\text{O}_6\text{S}_2$  ( $\text{M}+\text{NH}_4$ ) $^+$ : calcd 571.1685, found 571.1686.

#### *N,N'*-(1-(4-Hydroxyphenyl)-1*H*-pyrrole-2,5-diyl)bis(*N*-benzylmethanesulfonamide) (**3h**)

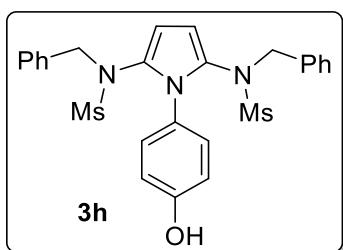

Following the general procedure GP-1, product **3h** (101 mg) was obtained in 82% yield as brown solid; mp = 135–137 °C;  $R_f$  = 0.41 (3:2 hexane/Acetone); [Silica, UV and  $I_2$ ];  $^1\text{H NMR}$  (400 MHz,  $\text{DMSO}-d_6$ )  $\delta$  9.56 (s, 1H), 7.31–7.22 (m, 8H), 6.97 (d,  $J$  = 6.8 Hz, 4H), 6.46 (s,



2H), 6.14 (s, 2H), 4.32 (s, 4H), 2.89 (s, 6H);  $^{13}\text{C}$  NMR (101 MHz,  $\text{CDCl}_3$ )  $\delta$  157.4, 135.7, 130.9, 129.8, 128.6, 128.3, 127.2, 126.2, 114.5, 106.1, 55.9, 38.5; IR (Neat)  $\nu_{\text{max}}$  3390, 2924, 1621, 1064, 768  $\text{cm}^{-1}$ ; HRMS (ESI) for  $\text{C}_{26}\text{H}_{28}\text{N}_3\text{O}_5\text{S}_2$  ( $\text{M}+\text{H}$ ) $^+$ : calcd 526.1470, found 526.1472.

***N,N'*-(1-(4-(4,4,5,5-Tetramethyl-1,3,2-dioxaborolan-2-yl)phenyl)-1*H*-pyrrole-2,5-diyl)bis(*N*-benzylmethanesulfonamide) (3i)**

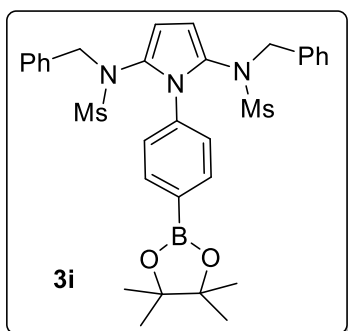

Following the general procedure GP-1, product **3i** (75 mg) was obtained in 61% yield as yellow solid; mp = 114–116 °C;  $R_f$  = 0.44 (2:3 hexane/EtOAc); [Silica, UV and  $\text{I}_2$ ];  $^1\text{H}$  NMR (500 MHz,  $\text{CDCl}_3$ )  $\delta$  7.66 (d,  $J$  = 7.5 Hz, 2H), 7.31–7.23 (m, 7H), 7.07 (q,  $J$  = 7.0 Hz, 5H), 6.03 (s, 2H), 4.32 (d,  $J$  = 6.5 Hz, 4H), 2.71 (s, 6H), 1.37 (s, 12H);  $^{13}\text{C}$  NMR (125 MHz,  $\text{CDCl}_3$ )  $\delta$  137.4, 134.9, 134.8, 129.7, 128.5, 128.4, 128.3, 128.2, 127.0, 106.4, 84.0, 56.1, 39.4, 24.9; IR (Neat)  $\nu_{\text{max}}$  3379, 2923, 1608, 1383, 1152, 1062, 757  $\text{cm}^{-1}$ ; HRMS (ESI) for  $\text{C}_{32}\text{H}_{38}\text{BN}_3\text{NaO}_6\text{S}_2$  ( $\text{M}+\text{Na}$ ) $^+$ : calcd 658.2193, found 658.2193.

***N,N'*-(1-(2-Phenoxyphenyl)-1*H*-pyrrole-2,5-diyl)bis(*N*-benzylmethanesulfonamide) (3j)**

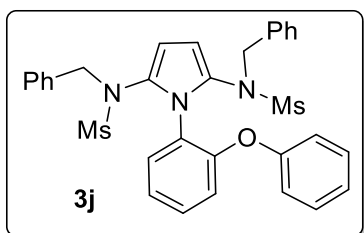

Following the general procedure GP-1, product **3j** (85 mg) was obtained in 73% yield as brown solid; mp = 200–202 °C;  $R_f$  = 0.49 (7:3 hexane/EtOAc); [Silica, UV and  $\text{I}_2$ ];  $^1\text{H}$  NMR (500 MHz,  $\text{CDCl}_3$ )  $\delta$  7.34–7.25 (m, 14H), 7.14 (t,  $J$  = 7.5 Hz, 1H), 7.05 (d,  $J$  = 8.0 Hz, 3H), 6.81 (d,  $J$  = 8.0 Hz, 1H), 5.88 (s, 2H), 4.74 (d,  $J$  = 14.4 Hz, 2H), 4.50 (d,  $J$  = 14.5 Hz, 2H), 2.61 (s, 6H);  $^{13}\text{C}$  NMR (125 MHz,  $\text{CDCl}_3$ )  $\delta$  154.8, 154.5, 135.7, 133.6, 130.5, 130.2, 129.9, 128.5, 128.3, 127.6, 125.0, 124.5, 122.1, 120.7, 115.3, 107.5, 55.6, 39.9; IR (Neat)  $\nu_{\text{max}}$  3391, 2924,

1623, 1384, 1063, 759  $\text{cm}^{-1}$ ; HRMS (ESI) for  $\text{C}_{32}\text{H}_{32}\text{N}_3\text{O}_5\text{S}_2$  ( $\text{M}+\text{H}$ )<sup>+</sup>: calcd 602.1783, found 602.1786.

**Methyl 2-(2,5-bis(*N*-benzylmethanesulfonamido)-1*H*-pyrrol-1-yl) benzoate (3k)**

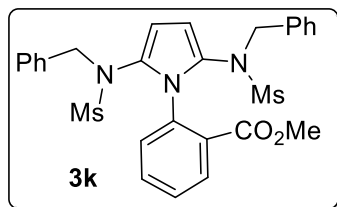

Following the general procedure GP-1, product **3k** (70 mg) was obtained in 63% yield as pale yellow solid; mp = 168–170 °C;  $R_f$  = 0.48 (7:3 hexane/EtOAc); [Silica, UV and  $\text{I}_2$ ];  **$^1\text{H}$  NMR (400 MHz,  $\text{CDCl}_3$ )**  $\delta$  7.96 (dd,  $J$  = 1.6, 7.6 Hz, 1H), 7.56–7.49 (m, 2H), 7.39 (s, 1H), 7.29–7.24 (m, 6H), 7.22–7.21 (m, 4H), 6.01 (s, 2H), 4.42 (q,  $J$  = 6.8 Hz, 4H), 3.66 (s, 3H), 2.62 (s, 6H);  **$^{13}\text{C}$  NMR (125 MHz,  $\text{CDCl}_3$ )**  $\delta$  165.1, 135.6, 135.1, 133.5, 132.6, 130.9, 129.5, 129.3, 128.5, 128.1, 106.5, 55.7, 52.2, 39.6; **IR (Neat)**  $\nu_{\text{max}}$  3385, 2924, 1723, 1342, 1062, 762  $\text{cm}^{-1}$ ; HRMS (ESI) for  $\text{C}_{28}\text{H}_{29}\text{N}_3\text{NaO}_6\text{S}_2$  ( $\text{M}+\text{Na}$ )<sup>+</sup>: calcd 590.1395, found 590.1391.

***N,N'*-(1-(2-chlorophenyl)-1*H*-pyrrole-2,5-diyl)bis(*N*-benzylmethanesulfonamide) (3l)**

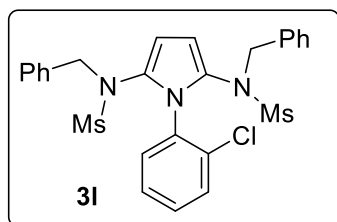

Following the general procedure GP-1, product **3l** (104 mg) was obtained in 71% yield as light brown solid; mp = 150–152 °C;  $R_f$  = 0.45 (7:3 hexane/EtOAc); [Silica, UV and  $\text{I}_2$ ];  **$^1\text{H}$  NMR (400 MHz,  $\text{CDCl}_3$ )**  $\delta$  7.46–7.45 (m, 1H), 7.45–7.44 (m, 1H), 7.42–7.35 (m, 2H), 7.33–7.28 (m, 10 H), 5.95 (s, 2H), 4.64 (d,  $J$  = 14.7 Hz, 2H), 4.48 (d,  $J$  = 14.7 Hz, 2H), 2.57 (s, 6H);  **$^{13}\text{C}$  NMR (101 MHz,  $\text{CDCl}_3$ )**  $\delta$  135.6, 134.4, 133.5, 133.3, 130.9, 139.7, 129.5, 128.5, 128.3, 127.6, 127.5, 107.6, 55.4 (2C), 39.9 (2C); **IR (Neat)**  $\nu_{\text{max}}$  3402, 2926, 1829, 1135, 1028, 858  $\text{cm}^{-1}$ ; HRMS (ESI) for  $\text{C}_{26}\text{H}_{27}\text{ClN}_3\text{O}_4\text{S}_2$  ( $\text{M}+\text{H}$ )<sup>+</sup>: calcd 544.1132, found 544.1132.

***N,N'*-(1-(3-Iodophenyl)-1*H*-pyrrole-2,5-diyl)bis(*N*-benzylmethanesulfonamide) (3m)**

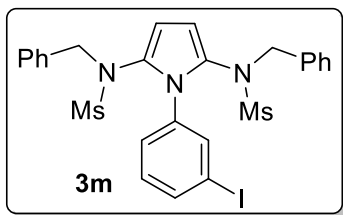

Following the general procedure GP-1, product **3m** (105 mg) was obtained in 86% yield as brown solid; mp = 224–226 °C;  $R_f$  = 0.48 (1:4 hexane/EtOAc); [Silica, UV and  $I_2$ ];  $^1\text{H NMR}$  (400 MHz,  $\text{CDCl}_3$ )  $\delta$  7.59 (dd,  $J$  = 1.6, 9.2 Hz, 1H), 7.32 (t,  $J$  = 7.2 Hz, 2H), 7.24 (t,  $J$  = 7.2 Hz, 5H), 6.98 (d,  $J$  = 7.2 Hz, 5H), 6.90 (t,  $J$  = 9.6 Hz, 1H), 6.13 (s, 2H), 4.33 (s, 4H), 2.81 (s, 6H);  $^{13}\text{C NMR}$  (125 MHz,  $\text{CDCl}_3$ )  $\delta$  137.3, 135.6, 134.3, 129.6, 129.5, 128.6, 128.5, 127.3, 106.1, 92.6, 56.6, 38.7; IR (Neat)  $\nu_{\text{max}}$  3396, 2926, 1330, 1154, 693  $\text{cm}^{-1}$ ; HRMS (ESI) for  $\text{C}_{26}\text{H}_{27}\text{IN}_3\text{O}_4\text{S}_2$  (M+H) $^+$ : calcd 636.0488, found 636.0480.

***N,N'*-(1-(3-(Trifluoromethyl)phenyl)-1*H*-pyrrole-2,5-diyl)bis(*N*-benzylmethanesulfonamide) (3n)**

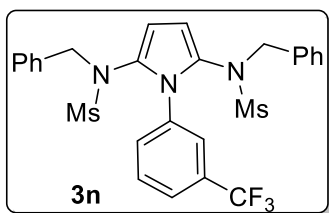

Following the general procedure GP-1, product **3n** (82 mg) was obtained in 73% yield as yellow solid; mp = 209–211 °C;  $R_f$  = 0.42 (7:3 hexane/EtOAc); [Silica, UV and  $I_2$ ];  $^1\text{H NMR}$  (400 MHz,  $\text{CDCl}_3$ )  $\delta$  7.50 (d,  $J$  = 8.0 Hz, 1H), 7.28–7.24 (m, 4H), 7.20–7.16 (m, 4H), 6.96–6.94 (m, 5H), 6.19 (s, 2H), 4.33 (s, 4H), 2.84 (s, 6H);  $^{13}\text{C NMR}$  (101 MHz,  $\text{CDCl}_3$ )  $\delta$  135.0, 134.2, 133.0, 130.5, 130.1, 129.5, 128.7, 128.6, 128.5, 127.5, 126.0, 124.9 (q,  $J$  = 3.0 Hz), 122.2, 106.1, 56.7, 38.5;  $^{19}\text{F NMR}$  (376 MHz,  $\text{CDCl}_3$ )  $\delta$  – 62.1; IR (Neat)  $\nu_{\text{max}}$  3378, 2924, 1611, 1383, 1064, 771  $\text{cm}^{-1}$ ; HRMS (ESI) for  $\text{C}_{27}\text{H}_{27}\text{F}_3\text{N}_3\text{O}_4\text{S}_2$  (M+H) $^+$ : calcd 578.1395, found 578.1394.

***N,N'*-(1-(3-Aminophenyl)-1*H*-pyrrole-2,5-diyl)bis(*N*-benzylmethanesulfonamide) (3o)**

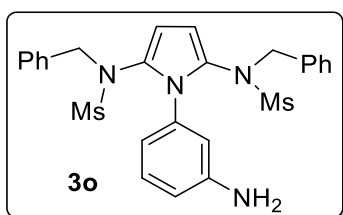

Following the general procedure GP-1, product **3o** (71 mg) was obtained in 71% yield as colorless solid; mp = 171–173 °C;  $R_f$  = 0.43 (EtOAc); [Silica, UV and I<sub>2</sub>]; <sup>1</sup>H NMR (400 MHz, CDCl<sub>3</sub>) δ 7.34–7.24 (m, 8H), 7.12–7.09 (m, 4H), 7.02 (t,  $J$  = 8.0 Hz, 1H), 6.61 (dd,  $J$  = 1.6, 7.6 Hz, 1H), 6.01 (s, 2H), 4.37 (s, 4H), 3.58 (s, 2H), 2.72 (s, 6H); <sup>13</sup>C NMR (125 MHz, CDCl<sub>3</sub>) δ 146.4, 135.7, 135.2, 129.7, 128.9, 128.5, 128.1, 126.9, 119.3, 116.0, 115.1, 106.3, 56.1, 39.5; IR (Neat)  $\nu_{\max}$  3383, 2924, 1617, 1383, 1063, 765 cm<sup>-1</sup>; HRMS (ESI) for C<sub>26</sub>H<sub>29</sub>N<sub>4</sub>O<sub>4</sub>S<sub>2</sub> (M+H)<sup>+</sup>: calcd 525.1630, found 525.1627.

***N,N'*-(1-(3-(Phenylethynyl)phenyl)-1*H*-pyrrole-2,5-diyl)bis(*N*-benzylmethanesulfonamide) (3p)**

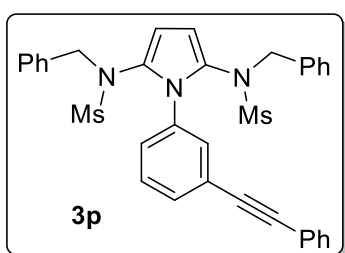

Following the general procedure GP-1, product **3p** (50 mg) was obtained in 43% yield as brown solid; mp = 179–181 °C;  $R_f$  = 0.39 (7:3 hexane/acetone); [Silica, UV and I<sub>2</sub>]; <sup>1</sup>H NMR (400 MHz, CDCl<sub>3</sub>) δ 7.58–7.55 (m, 2H), 7.45–7.42 (m, 2H), 7.40–7.36 (m, 3H), 7.30–7.27 (m, 4H), 7.25 (brs, 2H), 7.23–7.21 (m, 1H), 7.07–7.02 (m, 5H), 6.13 (s, 2H), 4.37 (s, 4H), 2.77 (s, 6H); <sup>13</sup>C NMR (125 MHz, CDCl<sub>3</sub>) δ 134.8, 134.6, 131.7, 131.6, 129.7, 129.5, 128.6, 128.5, 128.4, 128.3, 128.2, 128.1, 127.2, 123.2, 106.2, 90.2, 88.7, 56.5, 39.2, 38.8; IR (Neat)  $\nu_{\max}$  3386, 2923, 1611, 1064, 760 cm<sup>-1</sup>; HRMS (ESI) for C<sub>34</sub>H<sub>32</sub>N<sub>3</sub>O<sub>4</sub>S<sub>2</sub> (M+H)<sup>+</sup>: calcd 610.1834, found 610.1832.

***N,N'*-(1-(2,3-Dihydrobenzo[*b*][1,4]dioxin-5-yl)-1*H*-pyrrole-2,5-diyl)bis(*N*-benzylmethanesulfonamide) (3q)**

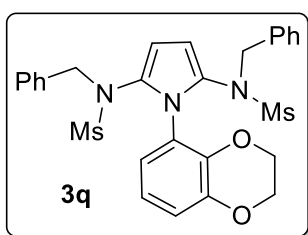

Following the general procedure GP-1, product **3q** (81 mg) was obtained in 74% yield as colorless solid; mp = 157–159 °C;  $R_f$  = 0.48 (7:3 hexane/EtOAc); [Silica, UV and I<sub>2</sub>]; <sup>1</sup>H NMR

(500 MHz, CDCl<sub>3</sub>)  $\delta$  7.29–7.25 (m, 7H), 7.09 (d,  $J$  = 6.5 Hz, 4H), 6.68 (d,  $J$  = 7.5 Hz, 1H), 6.41 (brs, 1H), 5.99 (s, 2H), 4.36 (s, 4H), 4.26 (d,  $J$  = 11.5 Hz, 4H), 2.76 (s, 6H); <sup>13</sup>C NMR (101 MHz, CDCl<sub>3</sub>)  $\delta$  143.8, 142.7, 135.0, 129.6, 128.5, 128.2, 127.8, 127.1, 116.5, 106.2, 64.3, 64.1, 56.2, 39.4; IR (Neat)  $\nu_{\max}$  3378, 2926, 1598, 1338, 1153, 1063, 761 cm<sup>-1</sup>; HRMS (ESI) for C<sub>28</sub>H<sub>30</sub>N<sub>3</sub>O<sub>6</sub>S<sub>2</sub> (M+H)<sup>+</sup>: calcd 568.1576, found 568.1577.

***N,N'*-(1-(Anthracen-1-yl)-1*H*-pyrrole-2,5-diyl)bis(*N*-benzylmethanesulfonamide) (3r)**

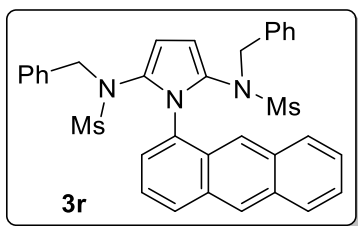

Following the general procedure GP-1, product **3r** (77 mg) was obtained in 65% yield as brown solid; mp = 222–224 °C;  $R_f$  = 0.47 (1:4 hexane/EtOAc); [Silica, UV and I<sub>2</sub>]; <sup>1</sup>H NMR (400 MHz, CDCl<sub>3</sub>)  $\delta$  8.41 (s, 1H), 8.22 (s, 1H), 8.03–7.99 (m, 2H), 7.82 (d,  $J$  = 9.2 Hz, 1H), 7.51–7.49 (m, 2H), 7.30–7.25 (m, 3H), 7.19–7.15 (m, 4H), 7.03–7.01 (m, 5H), 6.15 (s, 2H), 4.35 (s, 4H), 2.77 (s, 6H); <sup>13</sup>C NMR (101 MHz, CDCl<sub>3</sub>)  $\delta$  134.8, 132.2, 131.8, 131.7, 130.6, 130.5, 129.7, 128.5, 128.3, 128.2, 127.4, 127.3, 126.6, 126.0, 125.9, 125.7, 106.2, 56.4, 39.2; IR (Neat)  $\nu_{\max}$  3390, 2924, 1614, 1384, 1153, 1062, 756 cm<sup>-1</sup>; HRMS (ESI) for C<sub>34</sub>H<sub>32</sub>N<sub>3</sub>O<sub>4</sub>S<sub>2</sub> (M+H)<sup>+</sup>: calcd 610.1834, found 610.1835.

***N,N'*-(1-(4-Methoxy-2-methylphenyl)-1*H*-pyrrole-2,5-diyl)bis(*N*-benzylmethanesulfonamide) (3s)**

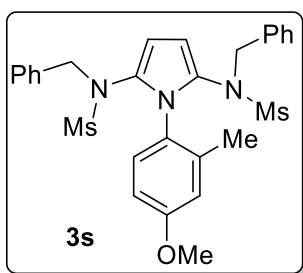

Following the general procedure GP-1, product **3s** (72 mg) was obtained in 67% yield as yellow solid; mp = 112–114 °C;  $R_f$  = 0.47 (3:2 hexane/EtOAc); [Silica, UV and I<sub>2</sub>]; <sup>1</sup>H NMR (500 MHz, CDCl<sub>3</sub>)  $\delta$  7.32–7.26 (m, 6H), 7.19 (dd,  $J$  = 1.5, 7.0 Hz, 4H), 7.05 (s, 1H), 6.72–6.71 (m, 2H), 5.95 (s, 2H), 4.43 (q,  $J$  = 6.5 Hz, 4H), 3.84 (s, 3H), 2.60 (s, 6H), 1.87 (s, 3H); <sup>13</sup>C NMR (125 MHz, CDCl<sub>3</sub>)  $\delta$  159.9, 135.4, 132.1, 129.5, 128.5, 128.2, 127.7, 126.9, 115.5,

111.4, 106.8, 55.9, 55.4, 39.9, 18.1; **IR (Neat)**  $\nu_{\max}$  3383, 2922, 1611, 1384, 1060, 767  $\text{cm}^{-1}$ ; HRMS (ESI) for  $\text{C}_{28}\text{H}_{31}\text{N}_3\text{NaO}_5\text{S}_2$  ( $\text{M}+\text{Na}$ )<sup>+</sup>: calcd 576.1603, found 576.1593.

***N,N'*-(1-(4-Fluoro-2-methylphenyl)-1*H*-pyrrole-2,5-diyl)bis(*N*-benzylmethanesulfonamide) (3t)**

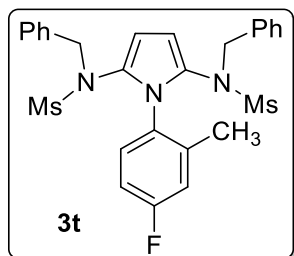

Following the general procedure GP-1, product **3t** (80 mg) was obtained in 77% yield as brown solid; mp = 147–149 °C;  $R_f$  = 0.43 (9:1 hexane/EtOAc); [Silica, UV and  $\text{I}_2$ ]; **<sup>1</sup>H NMR (400 MHz,  $\text{CDCl}_3$ )**  $\delta$  7.31–7.25 (m, 5H), 7.16 (dd,  $J$  = 1.6, 7.6 Hz, 4H), 7.01 (s, 1H), 6.86–6.84 (m, 3H), 6.02 (s, 2H), 4.43 (s, 4H), 2.64 (s, 6H), 1.78 (s, 3H); **<sup>13</sup>C NMR (101 MHz,  $\text{CDCl}_3$ )**  $\delta$  162.6 ( $J$  = 246.5 Hz), 140.6 ( $J$  = 9.1 Hz), 135.2, 132.9 ( $J$  = 9.1 Hz), 130.0, 129.9, 129.4, 128.6, 128.4, 127.9, 116.9 ( $J$  = 22.2 Hz), 112.9 ( $J$  = 22.2 Hz), 106.8, 56.3, 39.5, 17.9; **<sup>19</sup>F NMR (376 MHz,  $\text{CDCl}_3$ )**  $\delta$  –112.4; **IR (Neat)**  $\nu_{\max}$  3393, 2927, 1501, 1342, 1154, 1038, 756  $\text{cm}^{-1}$ ; HRMS (ESI) for  $\text{C}_{27}\text{H}_{29}\text{FN}_3\text{O}_4\text{S}_2$  ( $\text{M}+\text{H}$ )<sup>+</sup>: calcd 542.1584, found 542.1575.

***N,N'*-(1-(3,4-Dimethoxyphenyl)-1*H*-pyrrole-2,5-diyl)bis(*N*-benzylmethanesulfonamide) (3u)**

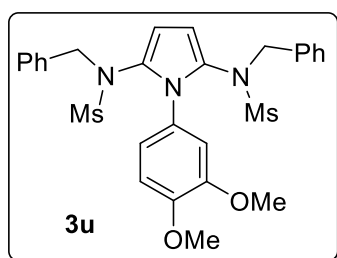

Following the general procedure GP-1, product **3u** (92 mg) was obtained in 84% yield as yellow solid; mp = 216–218 °C;  $R_f$  = 0.47 (1:1 hexane/EtOAc); [Silica, UV and  $\text{I}_2$ ]; **<sup>1</sup>H NMR (500 MHz,  $\text{CDCl}_3$ )**  $\delta$  7.28–7.20 (m, 7H), 7.04 (d,  $J$  = 7.0 Hz, 4H), 6.75 (s, 1H), 6.68 (d,  $J$  = 8.0 Hz, 1H), 6.03 (s, 2H), 4.31 (s, 4H), 3.91 (s, 3H), 3.76 (s, 3H), 2.83 (s, 6H); **<sup>13</sup>C NMR (125 MHz,  $\text{CDCl}_3$ )**  $\delta$  148.7, 148.3, 134.9, 129.5, 128.4, 128.2, 127.4, 127.3, 120.9, 113.0, 110.0, 105.7, 56.2, 56.1, 55.9, 39.6; **IR (Neat)**  $\nu_{\max}$  3392, 2928, 1514, 1339, 1153, 757  $\text{cm}^{-1}$ ; HRMS (ESI) for  $\text{C}_{28}\text{H}_{32}\text{N}_3\text{O}_6\text{S}_2$  ( $\text{M}+\text{H}$ )<sup>+</sup>: calcd 570.1733, found 570.1722.

***N,N'*-(1-(3,5-Bis(trifluoromethyl)phenyl)-1*H*-pyrrole-2,5-diyl)bis(*N*-benzylmethanesulfonamide) (3v)**

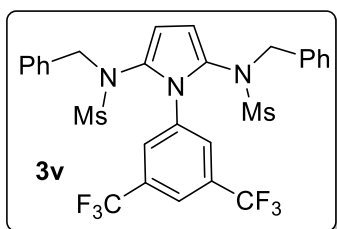

Following the general procedure GP-1, product **3v** (85 mg) was obtained in 68% yield as pale yellow solid; mp = 197–199 °C;  $R_f$  = 0.4 (1:1 hexane/EtOAc); [Silica, UV and  $I_2$ ];  **$^1\text{H NMR}$  (400 MHz,  $\text{CDCl}_3$ )**  $\delta$  7.65 (s, 1H), 7.21 (t,  $J$  = 7.6 Hz, 3H), 7.09 (t,  $J$  = 7.2 Hz, 5H), 6.82 (d,  $J$  = 6.4, 4H), 6.32 (s, 2H), 4.37 (brs, 4H), 2.97 (s, 6H);  **$^{13}\text{C NMR}$  (125 MHz,  $\text{CDCl}_3$ )**  $\delta$  135.6, 133.5, 131.1 (q,  $J$  = 27.3 Hz), 129.3, 128.7, 128.6, 127.7, 123.8, 121.7, 121.5, 106.1, 57.2, 37.8;  **$^{19}\text{F NMR}$  (376 MHz,  $\text{CDCl}_3$ )**  $\delta$  -62.4; **IR (Neat)**  $\nu_{\text{max}}$  3390, 2924, 1621, 1383, 1153, 1065, 697  $\text{cm}^{-1}$ ; HRMS (ESI) for  $\text{C}_{28}\text{H}_{25}\text{F}_6\text{N}_3\text{NaO}_4\text{S}_2$  ( $\text{M}+\text{Na}$ ) $^+$ : calcd 668.1088, found 668.1089.

***N,N'*-(1-(3,5-Dichlorophenyl)-1*H*-pyrrole-2,5-diyl)bis(*N*-benzylmethanesulfonamide) (3w)**

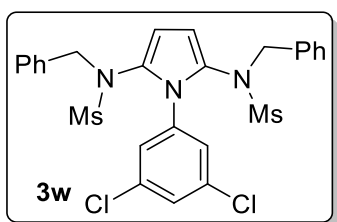

Following the general procedure GP-1, product **3w** (38 mg) was obtained in 34% yield as pale yellow solid; mp = 176–178 °C;  $R_f$  = 0.43 (7:3 hexane/EtOAc); [Silica, UV and  $I_2$ ];  **$^1\text{H NMR}$  (400 MHz,  $\text{CDCl}_3$ )**  $\delta$  7.34–7.28 (m, 4H), 7.20 (t,  $J$  = 8.0 Hz, 5H), 6.92 (d,  $J$  = 7.6 Hz, 4H), 6.22 (s, 2H), 4.35 (brs, 4H), 2.89 (s, 6H);  **$^{13}\text{C NMR}$  (101 MHz,  $\text{CDCl}_3$ )**  $\delta$  136.1, 134.0, 133.6, 129.5, 128.6, 128.4, 127.9, 127.4, 106.1, 56.9, 38.1; **IR (Neat)**  $\nu_{\text{max}}$  3385, 2923, 1622, 1383, 1156, 1060, 758  $\text{cm}^{-1}$ ; HRMS (ESI) for  $\text{C}_{26}\text{H}_{26}\text{Cl}_2\text{N}_3\text{O}_4\text{S}_2$  ( $\text{M}+\text{H}$ ) $^+$ : calcd 578.0742, found 578.0735.

***N,N'*-(1-(2-Methyl-5-nitrophenyl)-1*H*-pyrrole-2,5-diyl)bis(*N*-benzylmethanesulfonamide) (3x)**

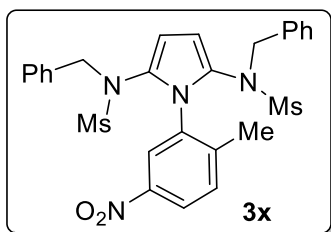

Following the general procedure GP-1, product **3x** (40 mg) was obtained in 36% yield as yellow solid; mp = 168–170 °C;  $R_f$  = 0.44 (1:4 hexane/EtOAc); [Silica, UV and  $I_2$ ];  $^1\text{H NMR}$  (500 MHz,  $\text{CDCl}_3$ )  $\delta$  8.13 (dd,  $J$  = 2.0, 8.5 Hz, 1H), 7.77 (s, 1H), 7.32–7.25 (m, 7H), 7.13 (d,  $J$  = 7.0 Hz, 4H), 6.14 (s, 2H), 4.45 (s, 4H), 2.71 (s, 6H), 1.84 (s, 3H);  $^{13}\text{C NMR}$  (125 MHz,  $\text{CDCl}_3$ )  $\delta$  146.7, 145.6, 134.8, 134.7, 131.1, 129.3, 128.7, 128.6, 128.5, 126.8, 123.9, 107.0, 56.8, 38.8, 18.2; **IR (Neat)**  $\nu_{\text{max}}$  3391, 2923, 1622, 1384, 1063, 754  $\text{cm}^{-1}$ ; HRMS (ESI) for  $\text{C}_{27}\text{H}_{29}\text{N}_4\text{O}_6\text{S}_2$  ( $\text{M}+\text{H}$ ) $^+$ : calcd 569.1529, found 569.1521.

***N,N'*-(1-(2-Chloro-4-nitrophenyl)-1*H*-pyrrole-2,5-diyl)bis(*N*-benzylmethanesulfonamide) (**3y**)**

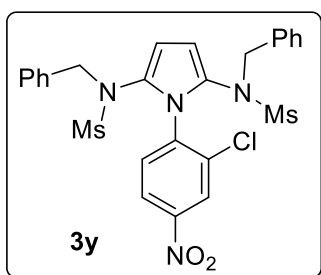

Following the general procedure GP-1, product **3y** (30 mg) was obtained in 26% yield as yellow solid; mp = 153–155 °C;  $R_f$  = 0.42 (3:2 hexane/EtOAc); [Silica, UV and  $I_2$ ];  $^1\text{H NMR}$  (400 MHz,  $\text{CDCl}_3$ )  $\delta$  8.17–8.12 (m, 2H), 7.35–7.25 (m, 12H), 6.09 (s, 2H), 4.64 (d,  $J$  = 14.8 Hz, 2H), 4.50 (d,  $J$  = 14.8 Hz, 2H), 2.66 (s, 6H);  $^{13}\text{C NMR}$  (101 MHz,  $\text{CDCl}_3$ )  $\delta$  148.3, 138.9, 135.7, 135.2, 135.1, 129.7, 128.7, 128.6, 128.2, 124.4, 121.9, 107.7, 56.1, 39.0; **IR (Neat)**  $\nu_{\text{max}}$  3778, 3399, 2925, 2346, 1619, 1384, 1063, 758  $\text{cm}^{-1}$ ; HRMS (ESI) for  $\text{C}_{26}\text{H}_{26}\text{ClN}_4\text{O}_6\text{S}_2$  ( $\text{M}+\text{H}$ ) $^+$ : calcd 589.0982, found 589.0972.

***N,N'*-(1-Mesityl-1*H*-pyrrole-2,5-diyl)bis(*N*-benzylmethanesulfonamide) (**3z**)**



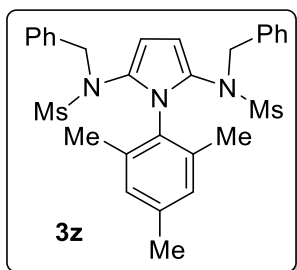

Following the general procedure GP-2, product **3z** (96 mg) was obtained in 90% yield as yellow solid; mp = 174–176 °C;  $R_f$  = 0.42 (3:2 hexane/EtOAc); [Silica, UV and  $I_2$ ];  **$^1\text{H NMR}$  (500 MHz,  $\text{CDCl}_3$ )**  $\delta$  7.28–7.25 (m, 6H), 7.23– 7.22 (m, 4H), 6.96 (s, 2H), 5.97 (s, 2H), 4.44 (s, 4H), 2.49 (s, 6H), 2.36 (s, 3H), 2.13 (s, 6H);  **$^{13}\text{C NMR}$  (125 MHz,  $\text{CDCl}_3$ )**  $\delta$  139.2, 137.9, 135.6, 131.1, 129.5, 129.2, 128.5, 128.2, 127.9, 107.4, 55.5, 41.0, 21.1, 18.9; **IR (Neat)**  $\nu_{\text{max}}$  3387, 2925, 1615, 1342, 1154, 1060, 759  $\text{cm}^{-1}$ ; HRMS (ESI) for  $\text{C}_{29}\text{H}_{34}\text{N}_3\text{O}_4\text{S}_2$  ( $\text{M}+\text{H}$ ) $^+$ : calcd 552.1991, found 552.1979.

***N,N'*-(1-(3,5-Difluoro-4-methoxyphenyl)-1*H*-pyrrole-2,5-diyl)bis(*N*-benzylmethanesulfonamide) (3aa)**

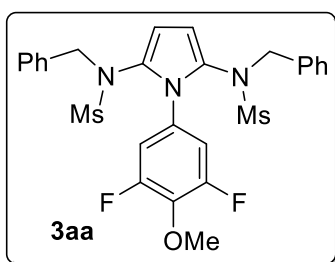

Following the general procedure GP-1, product **3aa** (76 mg) was obtained in 69% yield as brown solid; mp = 58–60 °C;  $R_f$  = 0.47 (7:3 hexane/EtOAc); [Silica, UV and  $I_2$ ];  **$^1\text{H NMR}$  (400 MHz,  $\text{CDCl}_3$ )**  $\delta$  7.31–7.28 (m, 3H), 7.21 (t,  $J$  = 7.7 Hz, 5H), 6.98 (d,  $J$  = 7.7 Hz, 4H), 6.16 (s, 2H), 4.36 (brs, 4H), 4.01 (s, 3H), 2.90 (s, 6H);  **$^{13}\text{C NMR}$  (101 MHz,  $d_6$ -DMSO)**  $\delta$  153.3 (d,  $J$  = 245.4 Hz), 153.2 (d,  $J$  = 245.4 Hz), 135.6, 135.5 (d,  $J$  = 28.5 Hz), 135.3, 129.6, 129.4 (d,  $J$  = 26.6 Hz), 129.3, 128.6, 128.2, 127.9, 114.1 (d,  $J$  = 18.2 Hz), 106.1, 62.1, 56.8, 37.4;  **$^{19}\text{F NMR}$  (376 MHz,  $\text{CDCl}_3$ )**  $\delta$  -128.5; **IR (Neat)**  $\nu_{\text{max}}$  3391, 2923, 1622, 1384, 1063, 754  $\text{cm}^{-1}$ ; HRMS (ESI) for  $\text{C}_{27}\text{H}_{27}\text{F}_2\text{N}_3\text{NaO}_5\text{S}_2$  ( $\text{M}+\text{Na}$ ) $^+$ : calcd 598.1258, found 598.1259.

***N,N'*-(1-(Quinolin-8-yl)-1*H*-pyrrole-2,5-diyl)bis(*N*-benzylmethanesulfonamide) (3ab)**

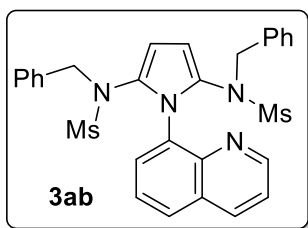

Following the general procedure GP-1, product **3ab** (63 mg) was obtained in 59% yield as pale-yellow solid; mp = 75–77 °C;  $R_f$  = 0.44 (7:3 hexane/EtOAc); [Silica, UV and I<sub>2</sub>]; **<sup>1</sup>H NMR (400 MHz, CDCl<sub>3</sub>)** δ 8.77 (dd,  $J$  = 1.5, 4.1 Hz, 1H), 8.22 (dd,  $J$  = 1.5, 8.2 Hz, 1H), 7.97–7.95 (m, 1H), 7.67 (t,  $J$  = 15.6 Hz, 1H), 7.39–7.36 (m, 1H), 7.26–7.21 (m, 11H), 6.02 (s, 2H), 4.29 (q,  $J$  = 13.0 Hz, 4H), 2.59 (s, 6H); **<sup>13</sup>C NMR (101 MHz, CDCl<sub>3</sub>)** δ 150.7, 145.4, 136.4, 135.9, 133.9, 132.8, 129.7, 129.6, 128.7, 128.6, 128.3, 128.0, 126.4, 121.7, 107.0, 55.2, 39.9; **IR (Neat)**  $\nu_{\max}$  3386, 2924, 1620, 1384, 1153, 1062, 756 cm<sup>-1</sup>; **HRMS (ESI)** for C<sub>29</sub>H<sub>29</sub>N<sub>4</sub>O<sub>4</sub>S<sub>2</sub> (M+H)<sup>+</sup>: calcd 561.1630, found 561.1630.

***N,N'*-(1-Octyl-1*H*-pyrrole-2,5-diyl)bis(*N*-benzylmethanesulfonamide) (3ac)**

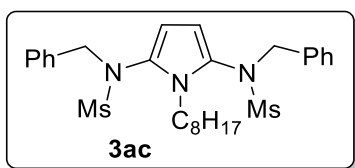

Following the general procedure GP-1, product **3ac** (89 mg) was obtained in 85% yield as yellow solid after 2 h; mp = 107–109 °C;  $R_f$  = 0.41 (7:3 hexane/EtOAc); [Silica, UV and I<sub>2</sub>]; **<sup>1</sup>H NMR (500 MHz, CDCl<sub>3</sub>)** δ 7.30–7.28 (m, 6H), 7.25–7.21 (m, 4H), 5.94 (s, 2H), 4.58 (s, 4H), 3.55 (s, 1H), 2.82 (s, 6H), 1.6 (s, 1H), 1.29–1.20 (m, 8H), 1.04 (brs, 4H), 0.89 (t,  $J$  = 7.0 Hz, 3H); **<sup>13</sup>C NMR (125 MHz, CDCl<sub>3</sub>)** δ 135.2, 129.9, 128.6, 128.5, 126.4, 105.1, 56.8, 43.0, 31.8, 29.8, 29.2, 29.0, 27.3, 22.6, 14.1; **IR (Neat)**  $\nu_{\max}$  3391, 2925, 1457, 1329, 1154, 1056, 698 cm<sup>-1</sup>; **HRMS (ESI)** for C<sub>28</sub>H<sub>40</sub>N<sub>3</sub>O<sub>4</sub>S<sub>2</sub> (M+H)<sup>+</sup>: calcd 546.2460, found 546.2460.

***N,N'*-(1-Cyclohexyl-1*H*-pyrrole-2,5-diyl)bis(*N*-benzylmethanesulfonamide) (3ad)**

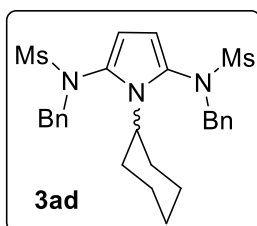

Following the general procedure GP-1, an inseparable isomeric mixture of product **3ad** (57 mg) was obtained in 58% yield as pale yellow solid after 2 h; mp = 154–156 °C;  $R_f$  = 0.49 (3:2 hexane/EtOAc); [Silica, UV and  $I_2$ ];  $^1\text{H NMR}$  (400 MHz,  $\text{CDCl}_3$ )  $\delta$  7.34–7.31 (m, 8H), 7.28–7.26 (m, 2H), 5.90 (d,  $J$  = 4.8 Hz, 2H), 4.66–4.59 (m, 4H), 3.93–3.88 (m, 1H), 2.80 (s, 3H), 2.76 (s, 3H), 1.95–1.88 (m, 1H), 1.73 (s, 1H), 1.66–1.63 (m, 2H), 1.32–1.29 (m, 2H), 1.12–1.08 (s, 3H), 0.93–0.87 (m, 1H);  $^{13}\text{C NMR}$  (125 MHz,  $\text{CDCl}_3$ )  $\delta$  135.0, 134.9, 130.3, 130.2, 128.7, 128.6, 128.5, 126.7, 126.2, 105.8, 105.6, 57.5, 57.3, 56.6, 56.5, 38.5, 38.0, 33.3, 33.1, 33.0, 30.9, 29.7, 27.0, 26.9, 25.5, 25.4; **IR** (Neat)  $\nu_{\text{max}}$  3381, 2928, 1338, 1153, 1062, 757  $\text{cm}^{-1}$ ; HRMS (ESI) for  $\text{C}_{26}\text{H}_{34}\text{N}_3\text{O}_4\text{S}_2$  ( $\text{M}+\text{H}$ ) $^+$ : calcd 516.1991, found 516.1989.

***N,N'*-(1-(4-((4-(2,5-Bis(*N*-benzylmethylsulfonamido)-1*H*-pyrrol-1-yl)phenyl)sulfonyl)phenyl)-1*H*-pyrrole-2,5-diyl)bis(*N*-benzylmethanesulfonamide) (3ae)**

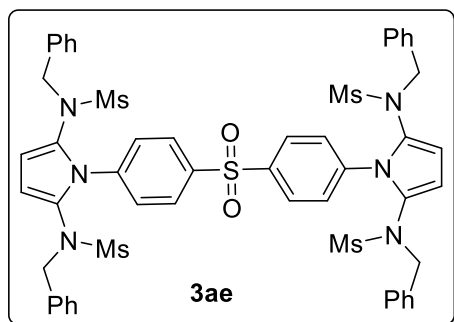

Following the general procedure GP-1, **1ae** (0.1, 24 mg) and **2a** (0.19 mmol, 80 mg) reacted to obtain product **3ae** (55 mg) in 53% yield as pale yellow solid; mp = 170–172 °C;  $R_f$  = 0.47 (1:4 hexane/EtOAc); [Silica, UV and  $I_2$ ];  $^1\text{H NMR}$  (400 MHz,  $d_6$ -DMSO)  $\delta$  7.49 (s, 5H), 7.23 (t,  $J$  = 6.8 Hz, 5H), 7.05 (brs, 9H), 6.77 (brs, 9H), 6.50 (s, 4H), 4.32 (brs, 8H), 3.05 (s, 12H);  $^{13}\text{C NMR}$  (101 MHz,  $d_6$ -DMSO)  $\delta$  139.6, 139.5, 135.0, 130.2, 129.6, 128.7, 128.3, 127.8, 126.9, 106.5, 56.7, 37.4; **IR** (Neat)  $\nu_{\text{max}}$  3395, 2924, 1384, 1066, 765  $\text{cm}^{-1}$ ; HRMS (ESI) for  $\text{C}_{52}\text{H}_{52}\text{N}_6\text{NaO}_{10}\text{S}_5$  ( $\text{M}+\text{Na}$ ) $^+$ : calcd 1103.2246, found 1103.2257.

***N,N'*-(Thiazolo[3,2-*a*][1,3]diazepine-5,8-diyl)bis(*N*-benzylmethanesulfonamide) (3af)**

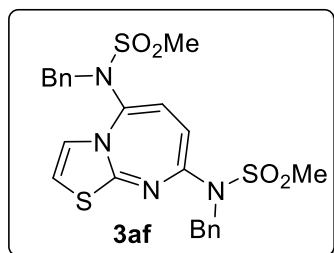

Following the general procedure GP-1, **1af** (0.48 mmol, 48 mg), **2a** (0.24 mmol, 100 mg), Cu(OAc)<sub>2</sub> (0.024 mmol, 4.3 mg), Zn(OTf)<sub>2</sub> (0.024 mmol, 8.7 mg) and 4 Å MS (15 mg) were used in 1,4-dioxane (3 mL) and product **3af** (33 mg) was obtained in 26% yield as brown solid; mp = 63–65 °C; *R<sub>f</sub>* = 0.43 (2:3 hexane/EtOAc); [Silica, UV and I<sub>2</sub>]; <sup>1</sup>H NMR (400 MHz, CDCl<sub>3</sub>) δ 7.68 (d, *J* = 14.0 Hz, 1H), 7.37–7.25 (m, 8H), 7.13 (d, *J* = 7.2 Hz, 2H), 6.84 (d, *J* = 4.4 Hz, 1H), 6.53 (d, *J* = 4.8 Hz, 1H), 5.13 (d, *J* = 14.0 Hz, 1H), 5.00 (d, *J* = 16.4 Hz, 1H), 4.65 (d, *J* = 14.0 Hz, 1H), 4.45 (d, *J* = 16.4 Hz, 1H), 4.32 (d, *J* = 14.0 Hz, 1H), 3.06 (s, 3H), 2.37 (s, 3H); <sup>13</sup>C NMR (101 MHz, CDCl<sub>3</sub>) δ 149.5, 140.6, 135.9, 135.3, 129.3, 129.0, 128.8, 128.5, 128.3, 127.8, 126.4, 117.7, 116.8, 111.6, 100.8, 54.9, 49.6, 39.9, 39.0; IR (Neat) *v*<sub>max</sub> 3618, 3016, 1452, 1205, 1024, 910 cm<sup>-1</sup>; HRMS (ESI) for C<sub>23</sub>H<sub>25</sub>N<sub>4</sub>O<sub>4</sub>S<sub>3</sub> (M+H)<sup>+</sup>: calcd 517.1038, found 517.1038.

***N,N'*-(Benzo[4,5]thiazolo[3,2-*a*][1,3]diazepine-2,5-diyl)bis(*N*-benzylmethanesulfonamide) (3ag)**

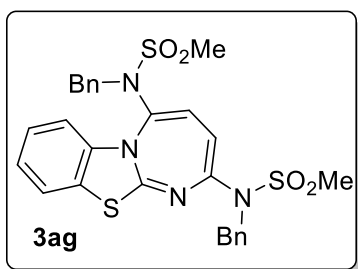

Following the general procedure GP-1, **1ag** (0.48 mmol, 72 mg), **2a** (0.24 mmol, 100 mg), Cu(OAc)<sub>2</sub> (0.024 mmol, 4.3 mg), Zn(OTf)<sub>2</sub> (0.024 mmol, 8.7 mg) and 4 Å MS (15 mg) were used in 1,4-dioxane (3 mL) and product **3ag** (39 mg) was obtained in 28% yield as brown solid; mp = 171–173 °C; *R<sub>f</sub>* = 0.41 (2:3 hexane/EtOAc); [Silica, UV and I<sub>2</sub>]; <sup>1</sup>H NMR (400 MHz, CDCl<sub>3</sub>) δ 7.73–7.67 (m, 2H), 7.60 (dd, *J* = 0.8, 8.0 Hz, 1H), 7.36–7.31 (m, 7H), 7.23 (d, *J* = 6.8 Hz, 1H), 7.20–7.16 (m, 4H), 5.00 (d, *J* = 16.4 Hz, 1H), 4.89 (d, *J* = 10.0 Hz, 1H), 4.86 (d, *J* = 9.6 Hz, 1H), 4.42 (d, *J* = 13.6 Hz, 1H), 4.17 (d, *J* = 16.4 Hz, 1H), 3.05 (s, 3H), 2.25 (s, 3H); <sup>13</sup>C NMR (101 MHz, CDCl<sub>3</sub>) δ 148.1, 141.2, 135.4, 135.3, 132.0, 129.9, 129.5, 129.0, 128.9, 128.7, 128.6, 127.7, 126.3, 126.2, 124.7, 123.8, 118.4, 113.6, 100.5, 55.3, 49.4, 40.1, 40.0; IR (Neat) *v*<sub>max</sub> 3348, 2970, 1466, 1408, 1305, 1160, 1128, 950 cm<sup>-1</sup>; HRMS (ESI) for C<sub>27</sub>H<sub>27</sub>N<sub>4</sub>O<sub>4</sub>S<sub>3</sub> (M+H)<sup>+</sup>: calcd 567.1194, found 567.1191.

***N,N'*-(9-Methoxybenzo[4,5]thiazolo[3,2-*a*][1,3]diazepine-2,5-diyl)bis(*N*-benzylmethanesulfonamide) (3ah)**

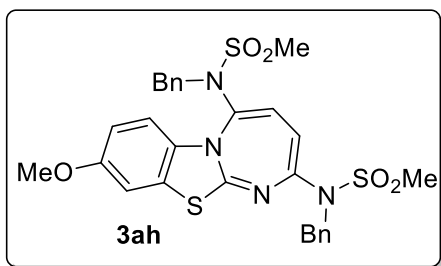

Following the general procedure GP-1, **1ah** (0.48 mmol, 86 mg), **2a** (0.24 mmol, 100 mg), Cu(OAc)<sub>2</sub> (0.024 mmol, 4.3 mg), Zn(OTf)<sub>2</sub> (0.024 mmol, 8.7 mg) and 4 Å MS (15 mg) were used in 1,4-dioxane (3 mL) and product **3ah** (36 mg) was obtained in 25% yield as brown solid; mp = 172–174 °C; *R<sub>f</sub>* = 0.41 (2:3 hexane/EtOAc); [Silica, UV and I<sub>2</sub>]; **<sup>1</sup>H NMR (400 MHz, CDCl<sub>3</sub>)** δ 7.66 (d, *J* = 14.0 Hz, 1H), 7.55 (d, *J* = 8.8 Hz, 1H), 7.35–7.27 (m, 5H), 7.24–7.16 (m, 5H), 7.10 (d, *J* = 2.0 Hz, 1H), 6.88 (dd, *J* = 2.4, 8.8 Hz, 1H), 4.99 (d, *J* = 16.4 Hz, 1H), 4.88 (d, *J* = 14.0 Hz, 1H), 4.83 (d, *J* = 14.0 Hz, 1H), 4.43 (d, *J* = 14.0 Hz, 1H), 4.19 (d, *J* = 16.4 Hz, 1H), 3.82 (s, 3H), 3.05 (s, 3H), 2.25 (s, 3H); **<sup>13</sup>C NMR (101 MHz, CDCl<sub>3</sub>)** δ 156.9, 147.4, 140.5, 135.4, 130.8, 129.8, 129.0, 128.9, 128.6, 128.2, 127.7, 126.2, 114.2, 113.4, 108.3, 100.7, 55.9, 55.3, 49.4, 39.9; **IR (Neat)** *v*<sub>max</sub> 3343, 2970, 1408, 1304, 1160, 1127, 949 cm<sup>-1</sup>; HRMS (ESI) for C<sub>28</sub>H<sub>29</sub>N<sub>4</sub>O<sub>5</sub>S<sub>3</sub> (M+H)<sup>+</sup>: calcd 597.1300, found 597.1281.

***N,N'*-(9-Methylbenzo[4,5]thiazolo[3,2-*a*][1,3]diazepine-2,5-diyl)bis(*N*-benzylmethanesulfonamide) (**3ai**)**

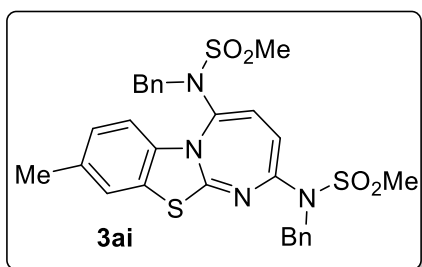

Following the general procedure GP-1, **1ai** (0.48 mmol, 79 mg), **2a** (0.24 mmol, 100 mg), Cu(OAc)<sub>2</sub> (0.024 mmol, 4.3 mg), Zn(OTf)<sub>2</sub> (0.024 mmol, 8.7 mg) and 4 Å MS (15 mg) were used in 1,4-dioxane (3 mL) and product **3ai** (58 mg) was obtained in 41% yield as brown solid; mp = 167–169 °C; *R<sub>f</sub>* = 0.47 (1:4 hexane/EtOAc); [Silica, UV and I<sub>2</sub>]; **<sup>1</sup>H NMR (400 MHz, CDCl<sub>3</sub>)** δ 7.69 (d, *J* = 14.0 Hz, 1H), 7.55 (d, *J* = 8.4 Hz, 1H), 7.39 (s, 1H), 7.35–7.28 (m, 5H), 7.23 (d, *J* = 6.8 Hz, 1H), 7.18 (t, *J* = 6.4 Hz, 4H), 7.13 (d, *J* = 8.4 Hz, 1H), 4.99 (d, *J* = 16.4 Hz, 1H), 4.88 (t, *J* = 14.0 Hz, 2H), 4.40 (d, *J* = 14.0 Hz, 1H), 4.16 (d, *J* = 16.4 Hz, 1H), 3.04 (s, 3H), 2.40 (s, 3H), 2.24 (s, 3H); **<sup>13</sup>C NMR (125 MHz, CDCl<sub>3</sub>)** δ 147.9, 140.9, 135.4, 135.3, 134.8, 130.0, 129.9, 129.6, 129.0, 128.9, 128.6, 128.3, 127.7, 127.3, 126.2, 123.9, 118.3, 113.2,

100.7, 55.3, 49.4, 40.0, 39.9, 21.3; **IR (Neat)**  $\nu_{\max}$  3340, 2969, 1466, 1407, 1305, 1159, 1127, 1107, 949  $\text{cm}^{-1}$ ; HRMS (ESI) for  $\text{C}_{28}\text{H}_{29}\text{N}_4\text{O}_4\text{S}_3$  ( $\text{M}+\text{H}$ )<sup>+</sup>: calcd 581.1351, found 581.1350.

***N,N'*-(9-Chlorobenzo[4,5]thiazolo[3,2-*a*][1,3]diazepine-2,5-diyl)bis(*N*-benzylmethanesulfonamide) (3aj)**

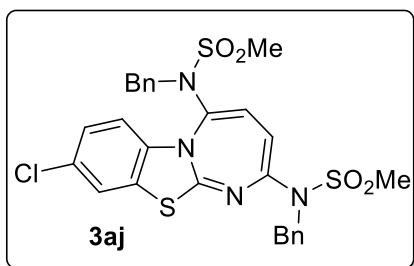

Following the general procedure GP-1, **1aj** (0.48 mmol, 88 mg), **2a** (0.24 mmol, 100 mg),  $\text{Cu}(\text{OAc})_2$  (0.024 mmol, 4.3 mg),  $\text{Zn}(\text{OTf})_2$  (0.024 mmol, 8.7 mg) and 4 Å MS (15 mg) were used in 1,4-dioxane (3 mL) and product **3aj** (36 mg) was obtained in 25% yield as brown solid; mp = 184–186 °C;  $R_f$  = 0.41 (2:3 hexane/EtOAc); [Silica, UV and  $\text{I}_2$ ]; **<sup>1</sup>H NMR (400 MHz,  $\text{CDCl}_3$ )**  $\delta$  7.73 (d,  $J$  = 14.0 Hz, 1H), 7.56 (d,  $J$  = 2.0 Hz, 1H), 7.52 (d,  $J$  = 8.8 Hz, 1H), 7.34–7.20 (m, 9H), 7.14 (d,  $J$  = 8.0 Hz, 2H), 4.99 (d,  $J$  = 16.4 Hz, 1H), 4.92 (d,  $J$  = 14.0 Hz, 1H), 4.73 (d,  $J$  = 14.0 Hz, 1H), 4.47 (d,  $J$  = 14.0 Hz, 1H), 4.26 (d,  $J$  = 16.4 Hz, 1H), 3.07 (s, 3H), 2.27 (s, 3H); **<sup>13</sup>C NMR (125 MHz,  $\text{CDCl}_3$ )**  $\delta$  147.8, 141.2, 135.3, 135.1, 130.9, 130.5, 130.2, 129.8, 129.0, 128.9, 128.7, 127.8, 126.6, 126.2, 123.4, 118.5, 114.3, 100.2, 55.4, 49.5, 40.0, 39.8; **IR (Neat)**  $\nu_{\max}$  3345, 2970, 1647, 1466, 1379, 1304, 1160, 1127, 1106, 949  $\text{cm}^{-1}$ ; HRMS (ESI) for  $\text{C}_{27}\text{H}_{26}\text{ClN}_4\text{O}_4\text{S}_3$  ( $\text{M}+\text{H}$ )<sup>+</sup>: calcd 601.0805, found 601.0803.

***N,N'*-(9-Fluorobenzo[4,5]thiazolo[3,2-*a*][1,3]diazepine-2,5-diyl)bis(*N*-benzylmethanesulfonamide) (3ak)**

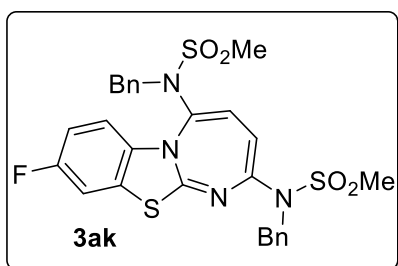

Following the general procedure GP-1, **1ak** (0.48 mmol, 81 mg), **2a** (0.24 mmol, 100 mg),  $\text{Cu}(\text{OAc})_2$  (0.024 mmol, 4.3 mg),  $\text{Zn}(\text{OTf})_2$  (0.024 mmol, 8.7 mg) and 4 Å MS (15 mg) were used in 1,4-dioxane (3 mL) and, product **3ak** (30 mg) was obtained in 21% yield as brown solid; mp = 191–193 °C;  $R_f$  = 0.43 (2:3 hexane/EtOAc); [Silica, UV and  $\text{I}_2$ ]; **<sup>1</sup>H NMR (400 MHz,  $\text{CDCl}_3$ )**  $\delta$  7.65 (d,  $J$  = 14.0 Hz, 1H), 7.48 (dd,  $J$  = 4.4, 8.8 Hz, 1H), 7.33–7.23 (m, 3H),

7.20 (d,  $J = 4.4$  Hz, 2H), 7.19 (s, 1H), 7.15 (t,  $J = 6.8$  Hz, 3H), 7.08 (d,  $J = 6.4$  Hz, 2H), 6.95 (dt,  $J = 2.8, 8.8$  Hz, 1H), 4.94 (d,  $J = 16.4$  Hz, 1H), 4.85 (d,  $J = 14.0$  Hz, 1H), 4.66 (d,  $J = 14.0$  Hz, 1H), 4.41 (d,  $J = 14.0$  Hz, 1H), 4.18 (d,  $J = 16.4$  Hz, 1H), 3.00 (s, 3H), 2.20 (s, 3H);  $^{13}\text{C}$  NMR (125 MHz,  $\text{CDCl}_3$ )  $\delta$  159.4 (d,  $J = 245$  Hz), 147.7, 140.9, 135.3, 135.1, 130.8, 130.7, 129.7, 129.0, 128.9, 128.8, 128.7, 128.6, 128.5, 127.8, 127.7, 126.2, 114.4 (d,  $J = 8.7$  Hz), 113.8 (d,  $J = 25.0$  Hz), 110.7 (d,  $J = 27.5$  Hz), 100.3, 55.3, 49.5, 39.9, 39.7;  $^{19}\text{F}$  NMR (376 MHz,  $\text{CDCl}_3$ )  $\delta$  -115.8; IR (Neat)  $\nu_{\text{max}}$  3345, 2970, 1767, 1466, 1408, 1304, 1160, 1128, 1107, 950  $\text{cm}^{-1}$ ; HRMS (ESI) for  $\text{C}_{27}\text{H}_{26}\text{FN}_4\text{O}_4\text{S}_3$  ( $\text{M}+\text{H}$ ) $^+$ : calcd 585.1100, found 585.1102.

***N,N'*-(1-(4-Methoxyphenyl)-1*H*-pyrrole-2,5-diyl)bis(*N*-benzyl-4-methylbenzenesulfonamide) (3al)**

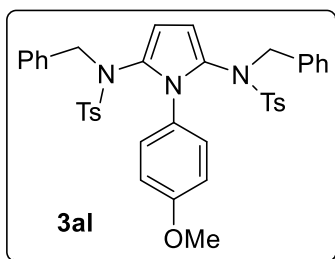

Following the general procedure GP-1, product **3al** (131 mg) was obtained in 77% yield as pale yellow solid; mp = 185–187 °C;  $R_f = 0.54$  (7:3 hexane/EtOAc); [Silica, UV and  $\text{I}_2$ ];  $^1\text{H}$  NMR (400 MHz,  $\text{CDCl}_3$ )  $\delta$  7.51 (d,  $J = 8.4$  Hz, 4H), 7.25–7.12 (m, 12H), 6.82 (d,  $J = 7.2$  Hz, 4H), 6.51 (s, 2H), 5.63 (s, 2H), 4.21 (brs, 4H), 3.81 (s, 3H), 2.44 (s, 6H);  $^{13}\text{C}$  NMR (101 MHz,  $\text{CDCl}_3$ )  $\delta$  158.9, 143.7, 135.7, 134.8, 130.7, 129.7, 129.3, 128.4, 128.2, 127.8, 127.4, 126.7, 112.7, 105.9, 56.4, 55.3, 21.6; IR (Neat)  $\nu_{\text{max}}$  3392, 2924, 1384, 1162, 762  $\text{cm}^{-1}$ ; HRMS (ESI) for  $\text{C}_{39}\text{H}_{38}\text{N}_3\text{O}_5\text{S}_2$  ( $\text{M}+\text{H}$ ) $^+$ : calcd 692.2253, found 692.2244.

***N,N'*-(1-(4-methoxyphenyl)-1*H*-pyrrole-2,5-diyl)bis(*N*-benzyl-4-bromobenzenesulfonamide) (3am)**

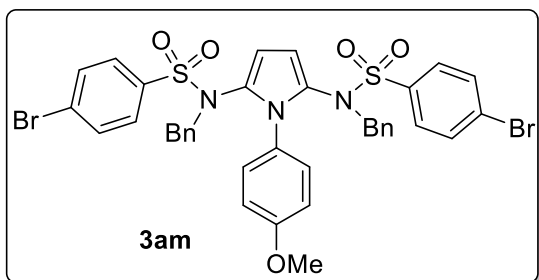

Following the general procedure GP-1, product **3am** (101 mg) was obtained in 65% yield as pale yellow solid; mp = 152–154 °C;  $R_f = 0.48$  (4:1 hexane/EtOAc); [Silica, UV and  $\text{I}_2$ ];  $^1\text{H}$

**NMR (400 MHz, CDCl<sub>3</sub>)**  $\delta$  7.57 (d,  $J$  = 8.4 Hz, 4H), 7.44 (d,  $J$  = 8.4 Hz, 4H), 7.28–7.15 (m, 8H), 6.86 (d,  $J$  = 7.2 Hz, 4H), 6.53 (s, 2H), 5.64 (s, 2H), 4.24 (brs, 4H), 3.83 (s, 3H); **<sup>13</sup>C NMR (101 MHz, CDCl<sub>3</sub>)**  $\delta$  159.1, 139.1, 137.6, 135.9, 134.5, 132.4, 132.0, 129.8, 129.7, 128.8, 128.7, 128.3, 128.1, 128.0, 127.9, 127.7, 127.0, 126.6, 112.9, 106.1, 56.5, 55.4; **IR (Neat)**  $\nu_{\max}$  3400, 2923, 1384, 1066, 741 cm<sup>-1</sup>; **HRMS (ESI)** for C<sub>37</sub>H<sub>32</sub>Br<sub>2</sub>N<sub>3</sub>O<sub>5</sub>S<sub>2</sub> (M+H)<sup>+</sup>: calcd 820.0150, found 820.0146.

***N,N'*-(1-(4-Methoxyphenyl)-1*H*-pyrrole-2,5-diyl)bis(*N*-benzyl-4-nitrobenzenesulfonamide) (3an)**

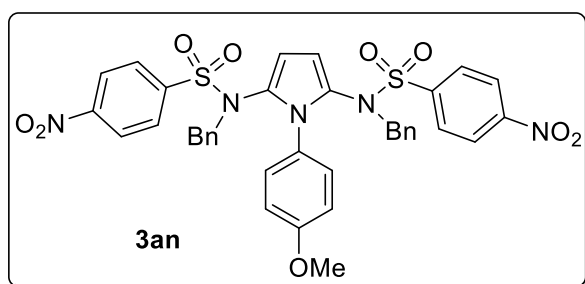

Following the general procedure GP-1, product **3an** (71 mg) was obtained in 49% yield as yellow solid; mp = 172–174 °C;  $R_f$  = 0.43 (7:3 hexane/EtOAc); [Silica, UV and I<sub>2</sub>]; **<sup>1</sup>H NMR (400 MHz, CDCl<sub>3</sub>)**  $\delta$  8.31–8.25 (m, 4H), 7.74 (d,  $J$  = 8.4 Hz, 4H), 7.31–7.17 (m, 8H), 6.89 (d,  $J$  = 7.2 Hz, 4H), 6.58 (s, 2H), 5.64 (s, 2H), 4.29 (brs, 4H), 3.84 (s, 3H); **<sup>13</sup>C NMR (125 MHz, CDCl<sub>3</sub>)**  $\delta$  159.5, 150.2, 144.4, 134.1, 129.7, 129.4, 128.8, 128.5, 128.4, 127.9, 126.7, 126.6, 124.3, 123.9, 113.2, 106.3, 56.8, 55.4; **IR (Neat)**  $\nu_{\max}$  3379, 2923, 1526, 1382, 1165, 740 cm<sup>-1</sup>; **HRMS (ESI)** for C<sub>37</sub>H<sub>32</sub>N<sub>5</sub>O<sub>9</sub>S<sub>2</sub> (M+H)<sup>+</sup>: calcd 754.1641, found 754.1640.

***N,N'*-(1-(4-Methoxyphenyl)-1*H*-pyrrole-2,5-diyl)bis(*N*-benzyl-4-(trifluoromethyl)benzenesulfonamide) (3ao)**

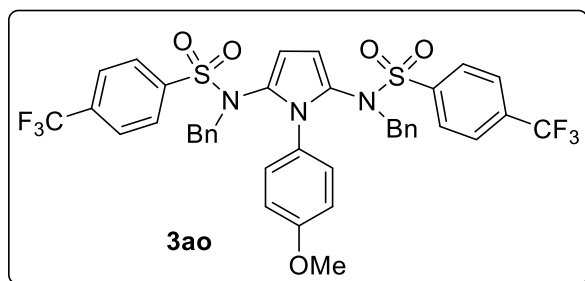

Following the general procedure GP-1, compound **3ao** (92 mg) was obtained in 60% yield as yellow solid; mp = 155–157 °C;  $R_f$  = 0.44 (4:1 hexane/EtOAc); [Silica, UV and I<sub>2</sub>]; **<sup>1</sup>H NMR (400 MHz, CDCl<sub>3</sub>)**  $\delta$  7.71 (t,  $J$  = 9.6 Hz, 8H), 7.29–7.25 (m, 3H), 7.20–7.14 (m, 4H), 6.87 (d,  $J$  = 7.2 Hz, 4H), 6.54 (s, 2H), 6.35 (s, 1H), 5.63 (s, 2H), 4.27 (brs, 4H), 3.83 (s, 3H); **<sup>13</sup>C NMR**



(125 MHz, CDCl<sub>3</sub>)  $\delta$  159.3, 142.3, 134.7, 134.4, 134.3, 129.7, 128.7, 128.4, 128.2, 126.9, 126.6, 125.8 (q,  $J = 3.7$  Hz), 124.3, 122.2, 113.0, 106.3, 56.6, 55.3; <sup>19</sup>F NMR (376 MHz, CDCl<sub>3</sub>)  $\delta$  - 63.1; IR (Neat)  $\nu_{\max}$  3403, 2926, 1384, 1062, 769 cm<sup>-1</sup>; HRMS (ESI) for C<sub>39</sub>H<sub>32</sub>F<sub>6</sub>N<sub>3</sub>O<sub>5</sub>S<sub>2</sub> (M+H)<sup>+</sup>: calcd 800.1688, found 800.1684.

***N,N'*-(Furan-2,5-diyl)bis(*N*-benzylmethanesulfonamide) (4)**

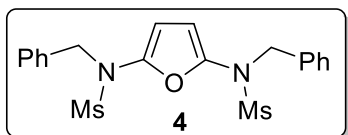

Following the general procedure of GP-1, compound **4** (76 mg) was obtained in 92% yield as yellow solid; mp = 67–69 °C;  $R_f = 0.47$  (7:3 hexane/EtOAc); [Silica, UV and I<sub>2</sub>]; <sup>1</sup>H NMR (400 MHz, CDCl<sub>3</sub>)  $\delta$  7.29–7.25 (m, 6H), 7.23–7.20 (m, 4H), 6.01 (s, 2H), 4.67 (s, 4H), 2.86 (s, 6H); <sup>13</sup>C NMR (125 MHz, CDCl<sub>3</sub>)  $\delta$  142.8, 135.2, 128.9, 128.6, 128.3, 108.7, 54.6, 39.3; IR (Neat)  $\nu_{\max}$  3389, 2925, 1617, 1347, 1156, 763 cm<sup>-1</sup>; HRMS (ESI) for C<sub>20</sub>H<sub>23</sub>N<sub>2</sub>O<sub>5</sub>S<sub>2</sub> (M+H)<sup>+</sup>: calcd 435.1048, found 435.1044.

**General procedure for bromination of **3** (GP-2):<sup>1</sup>**

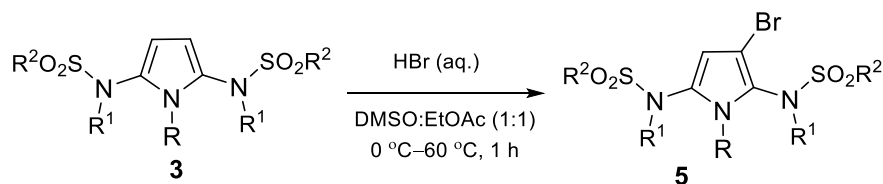

In a 15 mL Schlenk flask, substrate **3** (0.10 mmol) was dissolved in DMSO (2 mL) and EtOAc (2 mL) and subsequently the reaction flask was cooled at 0 °C. Next, HBr (aq.) (0.11 mmol) was introduced into the reaction flask dropwise and stirred for an additional 5 min at 0 °C. Later, the flask was heated at 60 °C for 1 h. Upon full conversion of starting material **3**, the reaction mixture was cooled to room temperature, diluted with dichloromethane (5 mL), and concentrated under reduced pressure. The crude residue was purified through silica gel column chromatography to obtain **5**.

***N,N'*-(3-Bromo-1-phenyl-1*H*-pyrrole-2,5-diyl)bis(*N*-benzylmethanesulfonamide) (5a)**

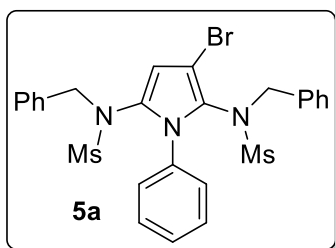

**3b** (55 mg), HBr (6  $\mu$ L), and following the general procedure of GP-2, product **5a** (58 mg) was obtained in 92% yield as pale yellow solid; mp = 154–155  $^{\circ}$ C;  $R_f$  = 0.52 (7:3 hexane/EtOAc); [Silica, UV and  $I_2$ ];  $^1\text{H NMR}$  (400 MHz,  $\text{CDCl}_3$ )  $\delta$  7.32–7.21 (m, 10H), 7.07–7.02 (m, 5H), 6.13 (s, 1H), 4.44 (q,  $J$  = 13.6 Hz, 2H), 4.27 (s, 2H), 2.93 (s, 3H), 2.67 (s, 3H);  $^{13}\text{C NMR}$  (125 MHz,  $\text{CDCl}_3$ )  $\delta$  134.6, 134.5, 134.3, 130.1, 129.6, 128.8, 128.7, 128.6, 128.5, 128.4, 128.1, 127.5, 109.1, 95.0, 56.2, 54.4, 41.8, 39.5; **IR** (Neat)  $\nu_{\text{max}}$  3389, 2925, 1342, 1154, 1028, 761  $\text{cm}^{-1}$ ; HRMS (ESI) for  $\text{C}_{26}\text{H}_{27}\text{BrN}_3\text{O}_4\text{S}_2$  ( $\text{M}+\text{H}$ ) $^+$ : calcd 588.0626, found 588.0614.

***N,N'*-(3-Bromo-1-(4-methoxyphenyl)-1*H*-pyrrole-2,5-diyl)bis(*N*-benzylmethanesulfonamide) (5b)**

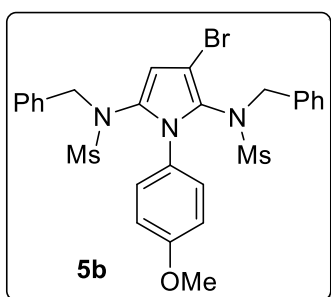

**3a** (55mg), HBr (6  $\mu$ L) and following the general procedure of GP-2, product **5b** (46 mg) was obtained in 70% yield as pale yellow solid; mp = 57–59  $^{\circ}$ C;  $R_f$  = 0.52 (7:3 hexane/EtOAc); [Silica, UV and  $I_2$ ];  $^1\text{H NMR}$  (400 MHz,  $\text{CDCl}_3$ )  $\delta$  7.32–7.22 (m, 7H), 7.09–7.05 (m, 5H), 6.62 (brs, 2H), 6.11 (s, 1H), 4.45 (q,  $J$  = 14.0 Hz, 2H), 4.28 (s, 2H), 3.80 (s, 3H), 2.95 (s, 3H), 2.69 (s, 3H);  $^{13}\text{C NMR}$  (125 MHz,  $\text{CDCl}_3$ )  $\delta$  159.6, 134.7, 134.6, 130.1, 129.6, 128.7, 128.6, 128.4, 128.4, 127.6, 126.8, 125.2, 113.2, 108.9, 94.7, 56.2, 55.3, 54.4, 41.8, 39.6; **IR** (Neat)  $\nu_{\text{max}}$  3392, 2924, 1154, 1064, 768  $\text{cm}^{-1}$ ; HRMS (ESI) for  $\text{C}_{27}\text{H}_{32}\text{BrN}_4\text{O}_5\text{S}_2$  ( $\text{M}+\text{NH}_4$ ) $^+$ : calcd 635.0997, found 635.0996.

***N,N'*-(3-Bromo-1-(4-butylphenyl)-1*H*-pyrrole-2,5-diyl)bis(*N*-benzylmethanesulfonamide) (5c)**

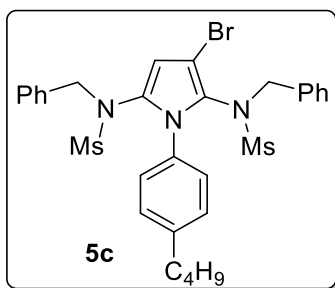

**3c** (60 mg), HBr (6  $\mu$ L), and following the general procedure of GP-2, product **5c** (58 mg) was obtained in 85% yield as colorless solid; mp = 133–135  $^{\circ}$ C;  $R_f$  = 0.5 (7:3 hexane/EtOAc); [Silica, UV and  $I_2$ ];  $^1\text{H NMR}$  (400 MHz,  $\text{CDCl}_3$ )  $\delta$  7.32–7.20 (m, 7H), 7.08–7.03 (m, 5H), 6.94 (brs, 2H), 6.10 (s, 1H), 4.44 (q,  $J$  = 7.2 Hz, 2H), 4.27 (s, 2H), 2.91 (s, 3H), 2.65 (s, 3H), 2.59 (t,  $J$  = 7.6 Hz, 2H), 1.63–1.55 (m, 2H), 1.42–1.33 (m, 2H), 0.95 (t,  $J$  = 7.2 Hz, 3H);  $^{13}\text{C NMR}$  (125 MHz,  $\text{CDCl}_3$ )  $\delta$  143.7, 134.7, 134.6, 131.8, 130.0, 129.9, 129.6, 128.7, 128.6, 128.5, 128.4, 128.3, 128.1, 127.4, 109.1, 94.9, 56.1, 54.4, 41.8, 39.6, 35.2, 33.3, 22.3, 13.9; **IR** (Neat)  $\nu_{\text{max}}$  3391, 2925, 1344, 1155, 767  $\text{cm}^{-1}$ ; HRMS (ESI) for  $\text{C}_{30}\text{H}_{35}\text{BrN}_3\text{O}_4\text{S}_2$  ( $\text{M}+\text{H}$ ) $^+$ : calcd 644.1252, found 644.1240.

***N,N'*-(3-Bromo-1-(3,5-difluoro-4-methoxyphenyl)-1*H*-pyrrole-2,5-diyl)bis(*N*-benzylmethanesulfonamide) (5d)**

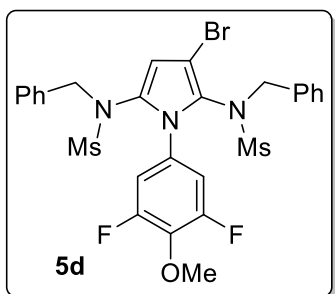

**3aa** (60 mg), HBr (6  $\mu$ L), and following the general procedure of GP-2, product **5d** (58 mg) was obtained in 85% yield as yellow solid; mp = 161–163  $^{\circ}$ C;  $R_f$  = 0.47 (7:3 hexane/EtOAc); [Silica, UV and  $I_2$ ];  $^1\text{H NMR}$  (400 MHz,  $\text{CDCl}_3$ )  $\delta$  7.32–7.18 (m, 8H), 6.99–6.95 (m, 4H), 6.23 (s, 1H), 4.54 (d,  $J$  = 13.6, 1H), 4.43–4.32 (m, 2H), 4.25 (d,  $J$  = 14.0, 1H), 4.00 (s, 3H), 3.10 (s, 3H), 2.85 (s, 3H);  $^{13}\text{C NMR}$  (125 MHz,  $\text{CDCl}_3$ )  $\delta$  153 (d,  $J$  = 246.2 Hz), 136.8, 136.7 (d,  $J$  = 13.5), 134.2, 134.0, 129.8, 129.5, 128.7, 127.9, 127.7, 127.6 (d,  $J$  = 12.4), 124.9, 114.5, 108.7, 94.9, 61.7 (t,  $J$  = 3.5 Hz), 56.7, 54.1, 41.4, 38.4;  $^{19}\text{F NMR}$  (376 MHz,  $\text{CDCl}_3$ )  $\delta$  –63.1; **IR** (Neat)  $\nu_{\text{max}}$  3391, 2926, 1514, 1343, 1155, 1035, 763  $\text{cm}^{-1}$ ; HRMS (ESI) for  $\text{C}_{27}\text{H}_{26}\text{BrF}_2\text{N}_3\text{NaO}_5\text{S}_2$  ( $\text{M}+\text{Na}$ ) $^+$ : calcd 676.0363, found 676.0365.

***N,N'*-(3-Benzoyl-1-(3,5-difluoro-4-methoxyphenyl)-1*H*-pyrrole-2,5-diyl)bis(*N*-benzylmethanesulfonamide) (6)<sup>2</sup>**

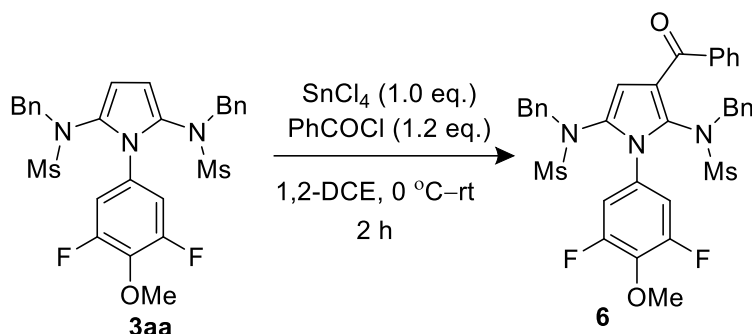

In an oven-dried 15 mL Schlenk flask, **3aa** (0.21 mmol, 120 mg) and  $\text{SnCl}_4$  (0.21 mmol, 54 mg) were taken. The Schlenk flask was cooled at 0 °C upon addition of 1,2-dichloroethane (5 mL). Next,  $\text{PhCOCl}$  (0.25 mmol, 28  $\mu\text{L}$ ) was added dropwise at 0 °C and later, the reaction mixture was stirred at room temperature for 2 h. The progress of the reaction was monitored by TLC and upon full consumption of starting material, the reaction mixture was diluted with dichloromethane (5 mL), and filtered through a small pad of Celite. The filtrate was concentrated under reduced pressure and crude residue was purified through silica gel column chromatography to obtain **6** (115 mg).

81% yield as brown solid; mp = 206–208 °C;  $R_f$  = 0.46 (7:3 hexane/EtOAc); [Silica, UV and  $\text{I}_2$ ];  $^1\text{H NMR}$  (400 MHz,  $\text{CDCl}_3$ )  $\delta$  7.72 (d,  $J$  = 7.2 Hz, 2H), 7.62 (t,  $J$  = 7.2 Hz, 1H), 7.51 (t,  $J$  = 7.6 Hz, 3H), 7.36 (t,  $J$  = 7.2 Hz, 1H), 7.31–7.27 (m, 4H), 7.17 (t,  $J$  = 7.6 Hz, 2H), 7.01 (d,  $J$  = 7.2 Hz, 2H), 6.95 (d,  $J$  = 7.2 Hz, 2H), 6.22 (s, 1H), 4.70 (s, 2H), 4.23 (s, 2H), 4.04 (s, 3H), 3.08 (s, 3H), 2.79 (s, 3H);  $^{13}\text{C NMR}$  (101 MHz,  $\text{CDCl}_3$ )  $\delta$  191.1, 153.5 (d,  $J$  = 251.5 Hz), 139.1, 137.1, 137.0 (d,  $J$  = 26.9 Hz), 134.6, 134.1, 132.5, 130.2, 129.9, 129.7, 129.2, 128.8, 128.5, 127.2 (d,  $J$  = 24.9 Hz), 127.1, 126.6, 118.4, 114.1, 110.8, 61.7, 56.2, 40.3; IR (Neat)  $\nu_{\text{max}}$  3389, 2926, 1644, 1342, 1154, 1038, 758  $\text{cm}^{-1}$ ;  $^{19}\text{F NMR}$  (376 MHz,  $\text{CDCl}_3$ )  $\delta$  –127.7, –127.8; HRMS (ESI) for  $\text{C}_{34}\text{H}_{32}\text{F}_2\text{N}_3\text{O}_6\text{S}_2$  ( $\text{M}+\text{H}$ )<sup>+</sup>: calcd 680.1701, found 680.1694.

***N,N'*-(3-Benzoyl-1-(3,5-difluoro-4-hydroxyphenyl)-1*H*-pyrrole-2,5-diyl)bis(*N*-benzylmethanesulfonamide) (7)**

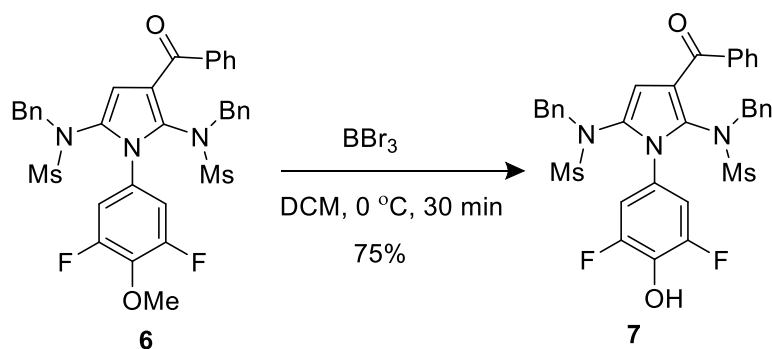

In an oven-dried 15 mL Schlenk flask, **6** (0.09 mmol, 60 mg) was dissolved in dichloromethane (2 mL) at 0 °C. Next, dropwise addition of BBr<sub>3</sub> (0.44 mmol, 42 μL) was performed at 0 °C into the flask and subsequently, the reaction mixture was stirred for an additional 30 min before quenching with H<sub>2</sub>O (2 mL). Later, the reaction mixture was extracted with DCM (10 mL), dried over Na<sub>2</sub>SO<sub>4</sub> and concentrated under reduced pressure. The residue was purified through silica gel column chromatography to obtain **7** (44 mg).

75% yield as pale yellow solid; mp = 214–216 °C; *R<sub>f</sub>* = 0.5 (3:2 hexane/EtOAc); [Silica, UV and I<sub>2</sub>]; <sup>1</sup>H NMR (400 MHz, CDCl<sub>3</sub>) δ 7.73 (s, 1H), 7.71 (s, 1H), 7.62 (t, *J* = 7.4 Hz, 1H), 7.51 (t, *J* = 7.7 Hz, 2H), 7.37 (t, *J* = 7.5 Hz, 1H), 7.32–7.26 (m, 5H), 7.19 (t, *J* = 7.5 Hz, 2H), 7.02 (d, *J* = 7.0 Hz, 2H), 6.96 (d, *J* = 7.1 Hz, 2H), 6.22 (s, 1H), 5.72 (brs, 1H), 4.70 (s, 2H), 4.29 (s, 2H), 3.09 (s, 3H), 2.78 (s, 3H); <sup>13</sup>C NMR (101 MHz, DMSO-*d*<sub>6</sub>) δ 190.7, 150.5 (d, *J* = 241.7 Hz), 150.4 (d, *J* = 241.4 Hz), 139.1, 135.2, 135.1, 134.7 (t, *J* = 11.3 Hz), 132.9, 130.1, 129.9, 129.7, 129.6, 129.0, 128.8 (d, *J* = 8.7 Hz), 128.5 (d, *J* = 10.2 Hz), 127.4, 123.5, 118.4, 110.3, 79.6, 60.2, 55.9, 37.7; <sup>19</sup>F NMR (376 MHz, CDCl<sub>3</sub>) δ -134.3, -134.6; IR (Neat) *v*<sub>max</sub> 3385, 2923, 1635, 1384, 1064, 1028 cm<sup>-1</sup>; HRMS (ESI) for C<sub>33</sub>H<sub>29</sub>F<sub>2</sub>KN<sub>3</sub>O<sub>6</sub>S<sub>2</sub> (M+K)<sup>+</sup>: calcd 704.1103, found 704.1073.

***N,N'*-(1-(3-((3-(2,5-Bis(*N*-benzylmethanesulfonyl)-1*H*-pyrrol-1-yl)phenyl)diazenyl)phenyl)-1*H*-pyrrole-2,5-diyl)bis(*N*-benzylmethanesulfonamide) (**8**)<sup>3</sup>**

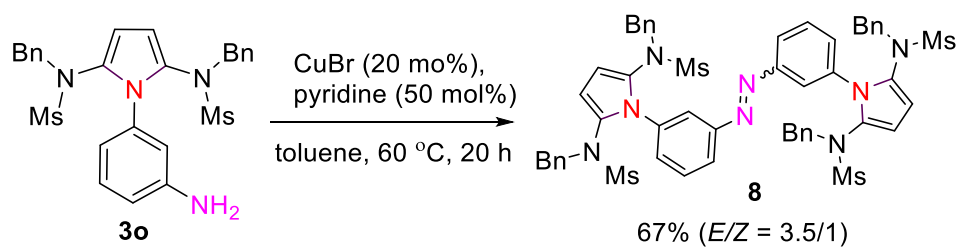

At first, **3o** (0.11 mmol, 60 mg) and CuBr (0.022 mmol, 3.1 mg) were taken in an oven-dried 15 mL Schlenk flask under inert atmosphere and subsequently freshly distilled toluene (1.0

mL) and pyridine (0.055 mmol, 4.0  $\mu$ L) were introduced successively into the reaction mixture at room temperature. Next, the reaction mixture was stirred vigorously at 60 °C for 20 h. Later, the reaction mixture was cooled to room temperature, diluted with dichloromethane (10 mL), and filtered through a short pad of Celite. The filtrate was concentrated under reduced pressure and the crude residue was purified through silica gel column chromatography to obtain **8** in 67% (40 mg) yield.

yellow solid with isomeric ratio of E:Z (3.5:1); mp = 177–179 °C;  $R_f$  = 0.41 (3:7 hexane/EtOAc); [Silica, UV and I<sub>2</sub>]; <sup>1</sup>H NMR (400 MHz, CDCl<sub>3</sub>)  $\delta$  7.86 (d,  $J$  = 8.4 Hz, 1H), 7.34–7.31 (m, 4H), 7.22–7.17 (m, 13H), 7.08 (d,  $J$  = 6.8 Hz, 3H), 7.03 (d,  $J$  = 6.8 Hz, 7H), 6.12 (s, 4H), 4.38 (s, 8H), 2.83 (s, 12H); <sup>13</sup>C NMR (125 MHz, CDCl<sub>3</sub>)  $\delta$  152.1, 135.6, 134.6, 134.5, 129.7, 129.6, 128.8, 128.7, 128.6, 128.3, 127.2, 106.5, 56.5, 39.0; IR (Neat)  $\nu_{\max}$  3398, 2923, 1339, 1153, 1027, 756 cm<sup>-1</sup>; HRMS (ESI) for C<sub>52</sub>H<sub>53</sub>N<sub>8</sub>O<sub>8</sub>S<sub>4</sub> (M+H)<sup>+</sup>: calcd 1045.2869, found 1045.2852.

## References:

- (a) Gayyur; Choudhary, S.; K, Ruchir.; Ghosh, N. Synergetic copper/zinc catalysis: synthesis of aryl/heteroaryl-fused 1H-pyrrolo[3,2-c]pyridines. *Chem. Commun.*, **2022**, 58, 1974–1977. (b) Tian, X.; Song, L.; Rudolph, M.; Rominger, F.; Oeser, T.; Hashmi, A. S. K. Sulfilimines as Versatile Nitrene Transfer Reagents: Facile Access to Diverse Aza-Heterocycles. *Angew. Chem., Int. Ed.* **2019**, 58, 3589–3593. (c) Kramer, S.; Madsen, J. L. H.; Rottländer, M.; Skrydstrup, T. Access to 2,5-Diamidopyrroles and 2,5-Diamidofurans by Au(I)-Catalyzed Double Hydroamination or Hydration of 1,3-Diynes. *Org. Lett.* **2010**, 12, 2758–2761. (d) Martínez-Esperón, M. F.; Rodríguez, D.; Castedo, L.; Saá, C. Coupling and cycloaddition of ynamides: homo- and Negishi coupling of tosylynamides and intramolecular [4D2] cycloaddition of N-(o-ethynyl)phenyl ynamides and arylynamides. *Tetrahedron* **2006**, 62, 3843–3855. (e) Rodríguez, D.; Castedo, L.; Saá, C. Homocoupling of 1-Alkynyl Tosylamides. *Synlett* **2004**, 377–379.
- Holtfrerich, A.; Hanekamp, W.; Lehr, M. (4-Phenoxyphenyl)tetrazolecarboxamides and related compounds as dual inhibitors of fatty acid amide hydrolase (FAAH) and monoacylglycerol lipase (MAGL). *Eur. J. Med. Chem.* **2013**, 63, 64–75.
- Xiao, Y.; Wu, X.; Wang, H.; Sun, S.; Yu, J.-T.; Cheng, J. Rhodium-Catalyzed Reaction of Azobenzenes and Nitrosoarenes toward Phenazines. *Org. Lett.* **2019**, 21, 2565–2568.

SH-20-483

 $^1\text{H}$  NMR,  $\text{CDCl}_3$ , 400 MHz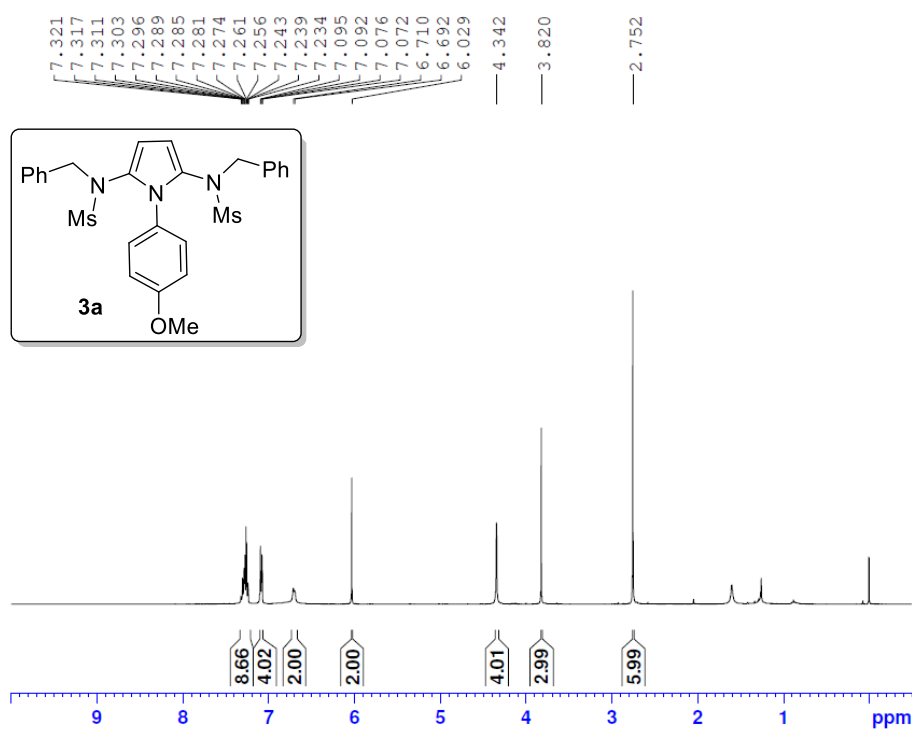

Current Data Parameters  
 NAME SH-20-483  
 EXPNO 340  
 PROCNO 1

F2 - Acquisition Parameters  
 Date\_ 20210702  
 Time 12.42  
 INSTRUM spect  
 PROBHD 5 mm PABBO BB/  
 PULPROG zg30  
 TD 65536  
 SOLVENT  $\text{CDCl}_3$   
 NS 8  
 DS 0  
 SWH 9615.385 Hz  
 FIDRES 0.146719 Hz  
 AQ 3.4078720 sec  
 RG 114.26  
 DW 52.000 usec  
 DE 6.50 usec  
 TE 300.7 K  
 D1 1.00000000 sec  
 TDO 1

==== CHANNEL f1 =====  
 SFO1 400.1629712 MHz  
 NUC1  $^1\text{H}$   
 P1 13.20 usec  
 PLW1 13.00000000 W

F2 - Processing parameters  
 SI 65536  
 SF 400.1605092 MHz  
 WDW EM  
 SSB 0  
 LB 0.30 Hz  
 GB 0  
 PC 1.00

 $^{13}\text{C}$  NMR,  $\text{CDCl}_3$ , 125 MHz

SH-20-483

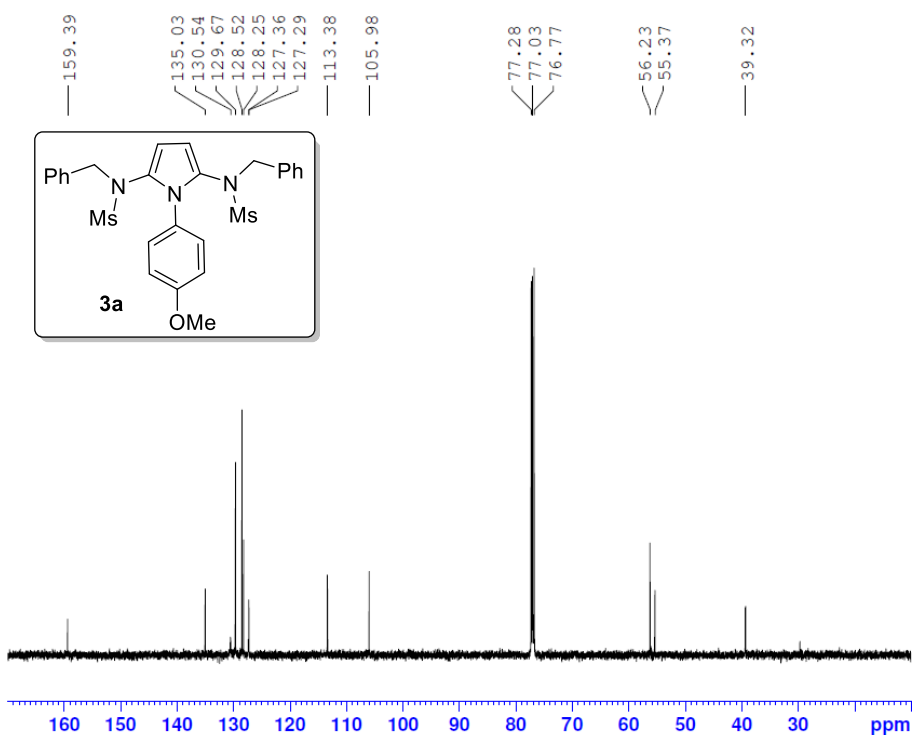

Current Data Parameters  
 NAME Desktop  
 EXPNO 600  
 PROCNO 1

F2 - Acquisition Parameters  
 Date\_ 20211122  
 Time 13.29  
 INSTRUM spect  
 PROBHD 5 mm PATXI 1H/  
 PULPROG zgpg30  
 TD 65536  
 SOLVENT  $\text{CDCl}_3$   
 NS 1024  
 DS 4  
 SWH 29761.904 Hz  
 FIDRES 0.454131 Hz  
 AQ 1.1010048 sec  
 RG 56.22  
 DW 16.800 usec  
 DE 6.50 usec  
 TE 303.0 K  
 D1 2.00000000 sec  
 D11 0.03000000 sec  
 TDO 1

==== CHANNEL f1 =====  
 SFO1 125.9077573 MHz  
 NUC1  $^{13}\text{C}$   
 P1 9.23 usec  
 PLW1 244.00000000 W

==== CHANNEL f2 =====  
 SFO2 500.6783527 MHz  
 NUC2  $^1\text{H}$   
 CPDPRG[2] waltz16  
 PCPD2 80.00 usec  
 PLW2 13.60000000 W  
 PLW12 0.08840500 W  
 PLW13 0.05657900 W

F2 - Processing parameters  
 SI 32768  
 SF 125.8951680 MHz  
 WDW EM  
 SSB 0  
 LB 1.00 Hz  
 GB 0  
 PC 1.40

|               |                |             |             |                 |              |                        |                      |
|---------------|----------------|-------------|-------------|-----------------|--------------|------------------------|----------------------|
| Sample Name   | HRMS22103JAN14 | Position    | Vial 14     | Instrument Name | Instrument 1 | User Name              |                      |
| Inj Vol       | 1              | InjPosition |             | SampleType      | Sample       | IRM Calibration Status | Some Ions Missed     |
| Data Filename | NG-20-121.d    | ACQ Method  | ISOCRATIC.m | Comment         |              | Acquired Time          | 1/3/2022 12:29:36 PM |

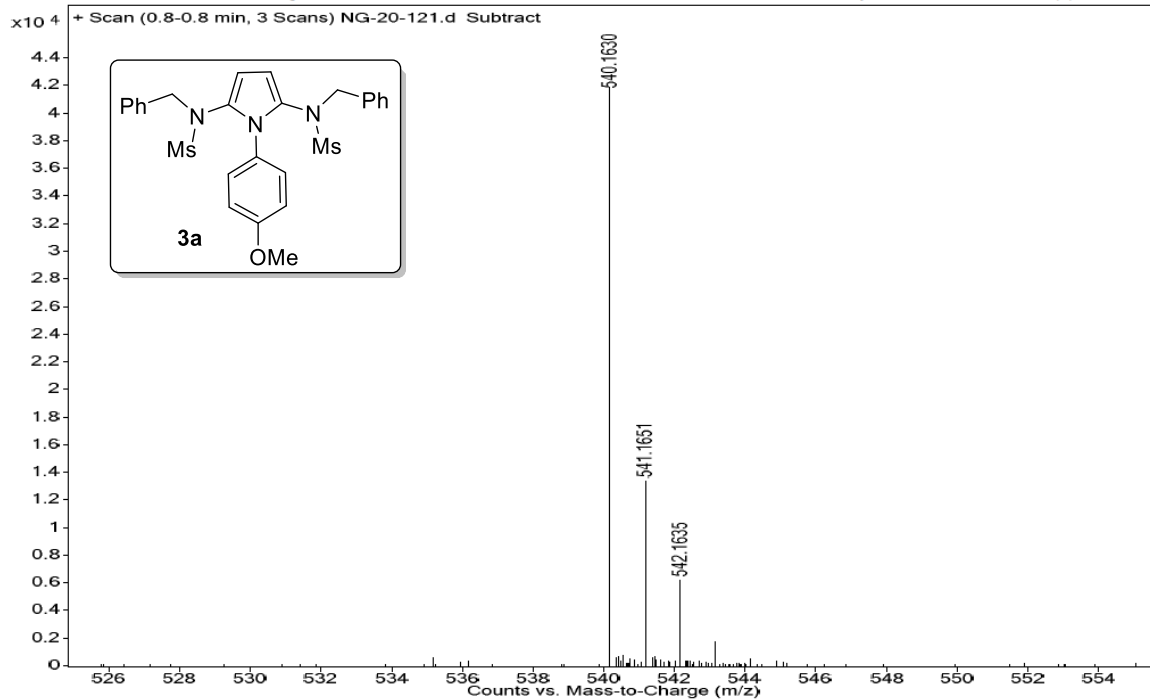

GR-21-53

<sup>1</sup>H NMR, CDCl<sub>3</sub>, 500 MHz

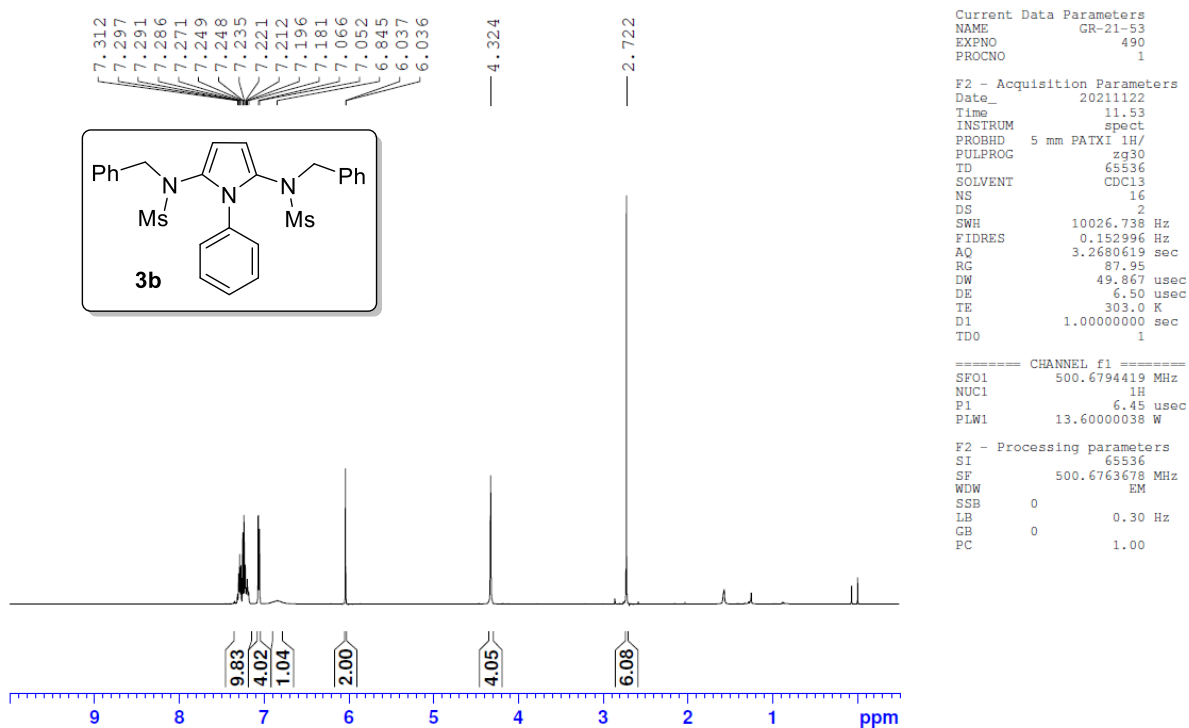



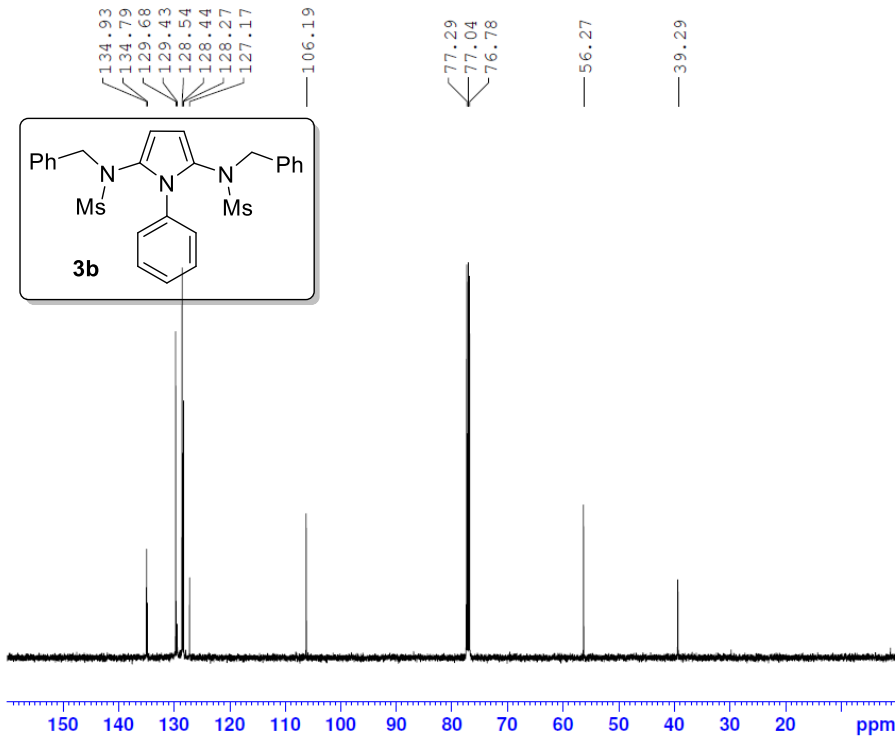

```

Current Data Parameters
NAME      Desktop
EXPNO    500
PROCNO   1

F2 - Acquisition Parameters
Date_    20211122
Time     11.55
INSTRUM spect
PROBHD   5 mm PATXI 1H/
PULPROG zgpg30
TD       65536
SOLVENT  CDCl3
NS       2048
DS       4
SWH      29761.904 Hz
FIDRES   0.454131 Hz
AQ       1.1010048 sec
RG       56.22
DW       16.800 usec
DE       6.50 usec
TE       303.0 K
D1       2.0000000 sec
D11      0.03000000 sec
TDO      1

===== CHANNEL f1 =====
SFO1    125.9077573 MHz
NUC1    13C
P1      9.23 usec
PLW1    244.0000000 W

===== CHANNEL f2 =====
SFO2    500.6783527 MHz
NUC2    1H
CPDPRG2 waltz16
PCPD2   80.00 usec
PLW2    13.60000038 W
PLW12   0.08840500 W
PLW13   0.05657900 W

F2 - Processing parameters
SI      32768
SF      125.8951680 MHz
WDW     EM
SSB     0
LB      1.00 Hz
GB      0
PC      1.40
    
```

| Sample Name   | HRMS22I19JAN29 | Position    | Vial 29     | Instrument Name | Instrument 1 | User Name              |                       |
|---------------|----------------|-------------|-------------|-----------------|--------------|------------------------|-----------------------|
| Inj Vol       | 1              | InjPosition |             | SampleType      | Sample       | IRM Calibration Status | Some Ions Missed      |
| Data Filename | BK-01.d        | ACQ Method  | ISOCRATIC.m | Comment         |              | Acquired Time          | 1/19/2022 12:59:50 PM |

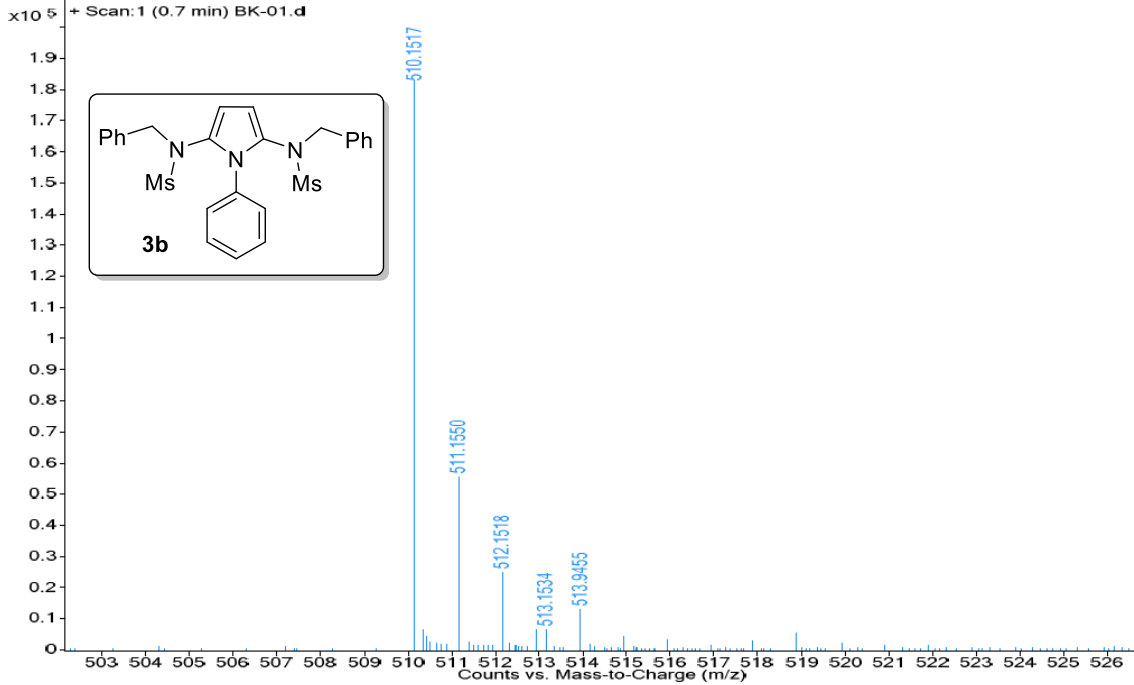

GR-21-21

 $^1\text{H}$  NMR,  $\text{CDCl}_3$ , 500 MHz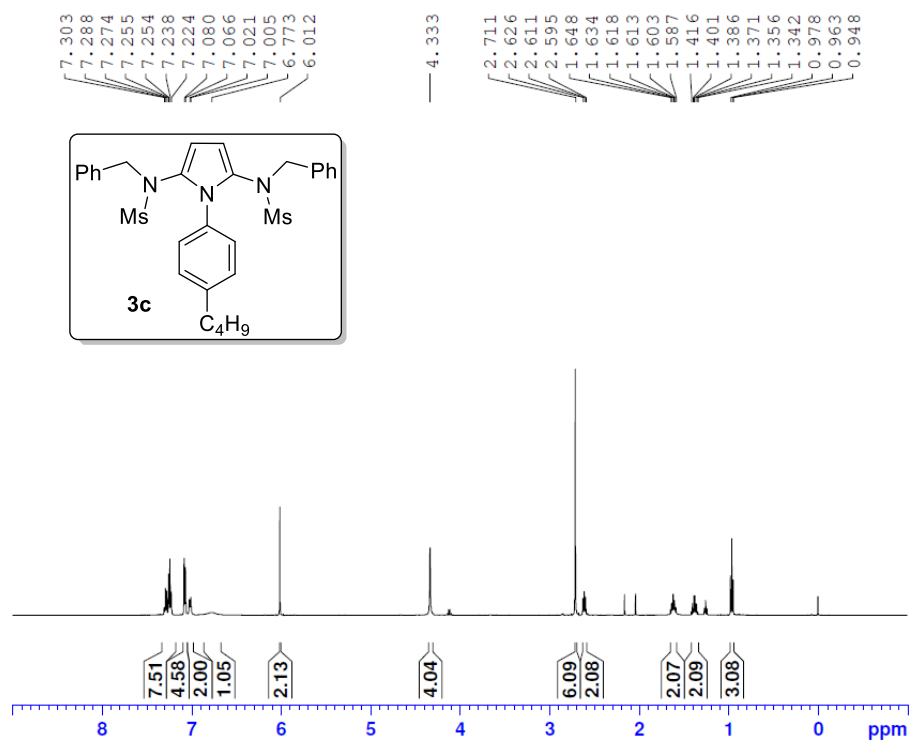

Current Data Parameters  
NAME GR-21-21  
EXPNO 350  
PROCNO 1

F2 - Acquisition Parameters  
Date\_ 20211101  
Time 16.10  
INSTRUM spect  
PROBHD 5 mm PATXI 1H/  
PULPROG zg30  
TD 65536  
SOLVENT  $\text{CDCl}_3$   
NS 16  
DS 2  
SWH 10026.738 Hz  
FIDRES 0.152996 Hz  
AQ 3.2680619 sec  
RG 61.7  
DW 49.867 usec  
DE 6.50 usec  
TE 303.0 K  
D1 1.00000000 sec  
TDO 1

===== CHANNEL f1 =====  
SFO1 500.6794419 MHz  
NUC1 1H  
P1 6.45 usec  
PLW1 13.60000038 W

F2 - Processing parameters  
SI 65536  
SF 500.6763637 MHz  
WDW EM  
SSB 0  
LB 0.30 Hz  
GB 0  
PC 1.00

GR-21-21

 $^{13}\text{C}$  NMR,  $\text{CDCl}_3$ , 125 MHz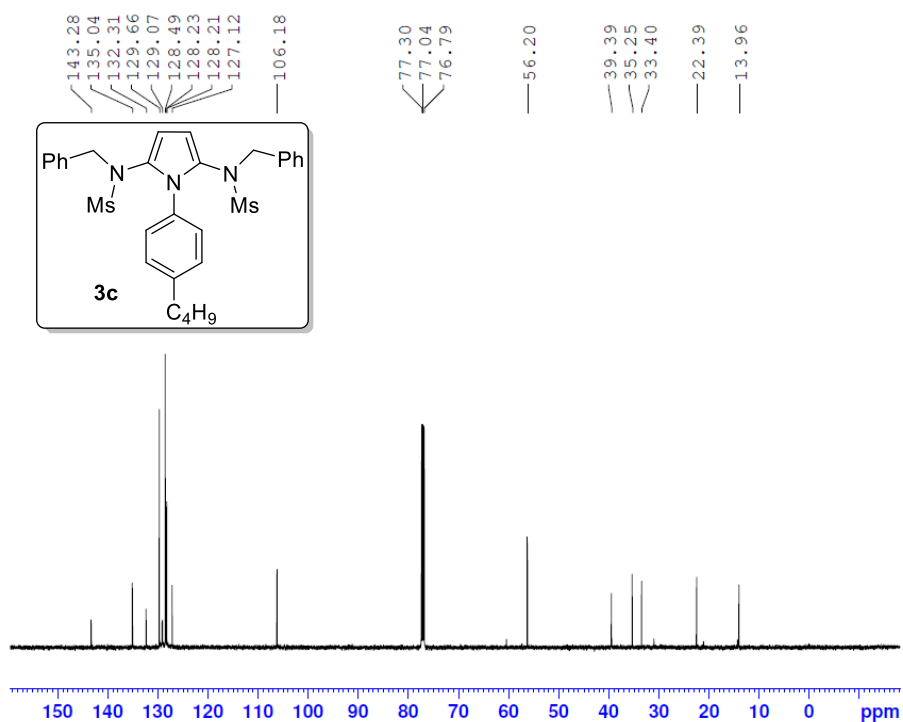

Current Data Parameters  
NAME Desktop  
EXPNO 360  
PROCNO 1

F2 - Acquisition Parameters  
Date\_ 20211101  
Time 17.05  
INSTRUM spect  
PROBHD 5 mm PATXI 1H/  
PULPROG zgpg30  
TD 65536  
SOLVENT  $\text{CDCl}_3$   
NS 1024  
DS 4  
SWH 29761.904 Hz  
FIDRES 0.454131 Hz  
AQ 1.1010048 sec  
RG 56.22  
DW 16,800 usec  
DE 6.50 usec  
TE 303.0 K  
D1 2.00000000 sec  
D11 0.03000000 sec  
TDO 1

===== CHANNEL f1 =====  
SFO1 125.9077573 MHz  
NUC1 13C  
P1 9.23 usec  
PLW1 244.00000000 W

===== CHANNEL f2 =====  
SFO2 500.6783527 MHz  
NUC2 1H  
CPDPRG[2] waltz16  
PCPD2 80.00 usec  
PLW2 13.60000038 W  
PLW12 0.08840500 W  
PLW13 0.05657900 W

F2 - Processing parameters  
SI 32768  
SF 125.8951680 MHz  
WDW EM  
SSB 0  
LB 1.00 Hz  
GB 0  
PC 1.40

Sample Name HRMS22118JAN24 Position Vial 24 Instrument Name Instrument 1 User Name  
 Inj Vol 1 InjPosition Sample Type Sample IRM Calibration Status Some Ions Missed  
 Data Filename SH-20-13.d ACQ Method ISOCRATIC.m Comment Acquired Time 1/18/2022 12:53:21 PM

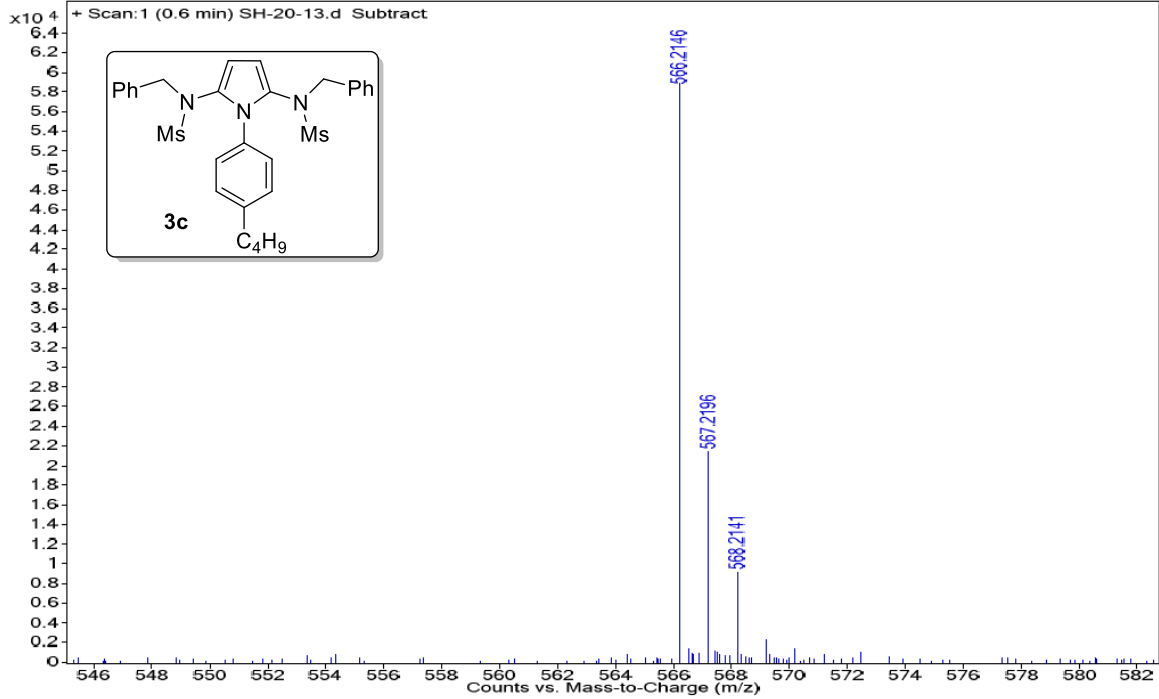

GR-21-10

$^1H$  NMR,  $CDCl_3$ , 400 MHz

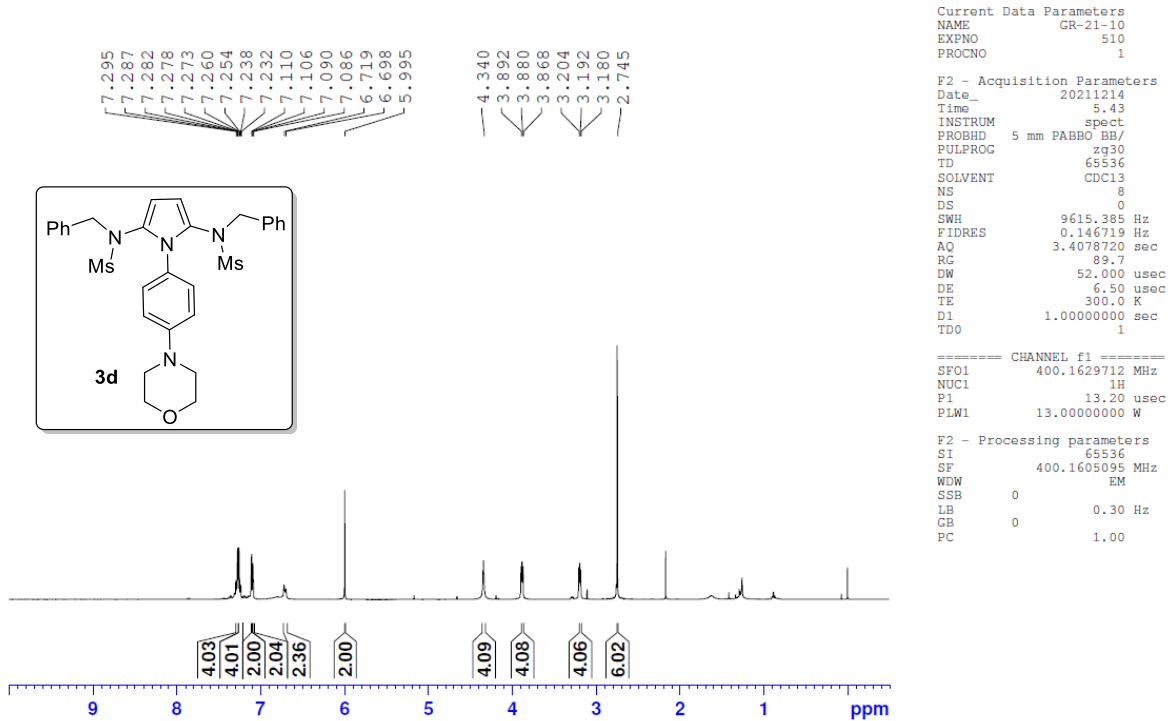

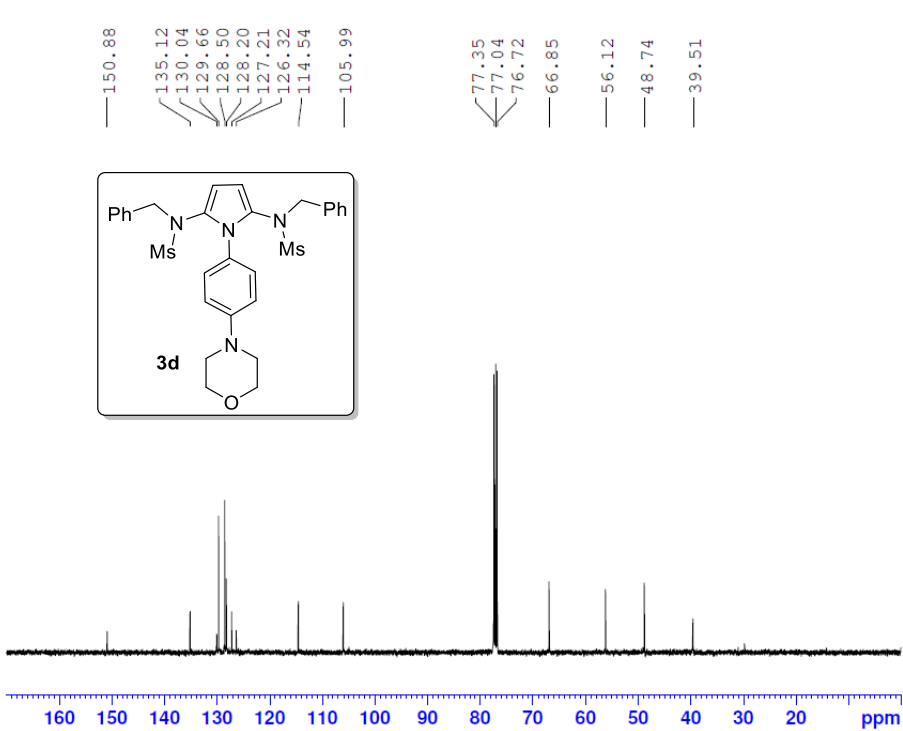

```

Current Data Parameters
NAME          GR-21-10
EXPNO        520
PROCNO       1

F2 - Acquisition Parameters
Date_        20211214
Time         6.04
INSTRUM     spect
PROBHD      5 mm PABBO BB/
PULPROG     zgpg30
ID          65536
SOLVENT     CDCl3
NS          2048
DS          0
SWH         24038.461 Hz
FIDRES     0.366798 Hz
AQ         1.3631488 sec
RG         201.48
DE         20.800 usec
TE         300.0 K
D1         2.0000000 sec
D11        0.03000000 sec
TD0        1

===== CHANNEL f1 =====
SFO1       100.6304993 MHz
NUC1       13C
P1         9.90 usec
PLW1       53.00000000 W

===== CHANNEL f2 =====
SFO2       400.1621006 MHz
NUC2       1H
PCPD2     waltz16
PCPD2     90.00 usec
PLW2       13.00000000 W
PLW12     0.27963999 W
PLW13     0.22651000 W

F2 - Processing parameters
SI         32768
SF         100.6204380 MHz
WDW        EM
SSB        0
LB         1.00 Hz
GB         0
PC         1.40
  
```

| Sample Name   | HRMS221033JAN13 | Position    | Vial 13     | Instrument Name | Instrument 1 | User Name              |                      |
|---------------|-----------------|-------------|-------------|-----------------|--------------|------------------------|----------------------|
| Inj Vol       | 1               | InjPosition |             | SampleType      | Sample       | IRM Calibration Status | Some Ions Missed     |
| Data Filename | NG-20-131.d     | ACQ Method  | ISOCRATIC.m | Comment         |              | Acquired Time          | 1/3/2022 12:27:04 PM |

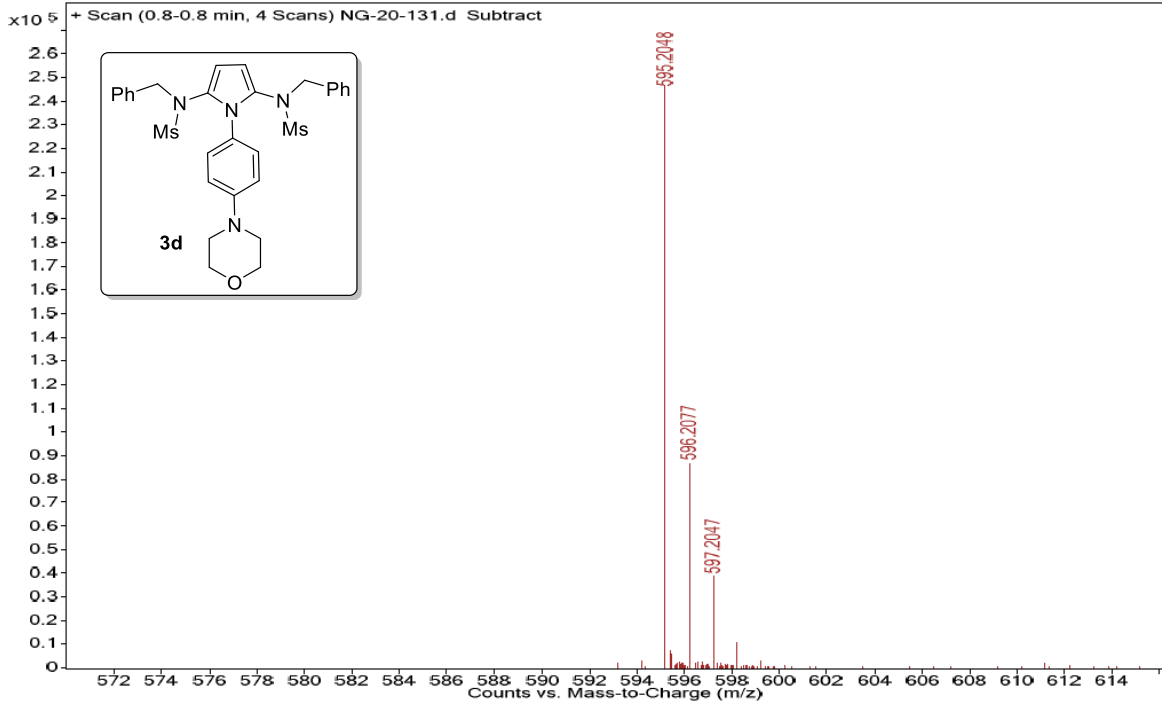

GR-21-36

 $^1\text{H}$  NMR,  $\text{CDCl}_3$ , 400 MHz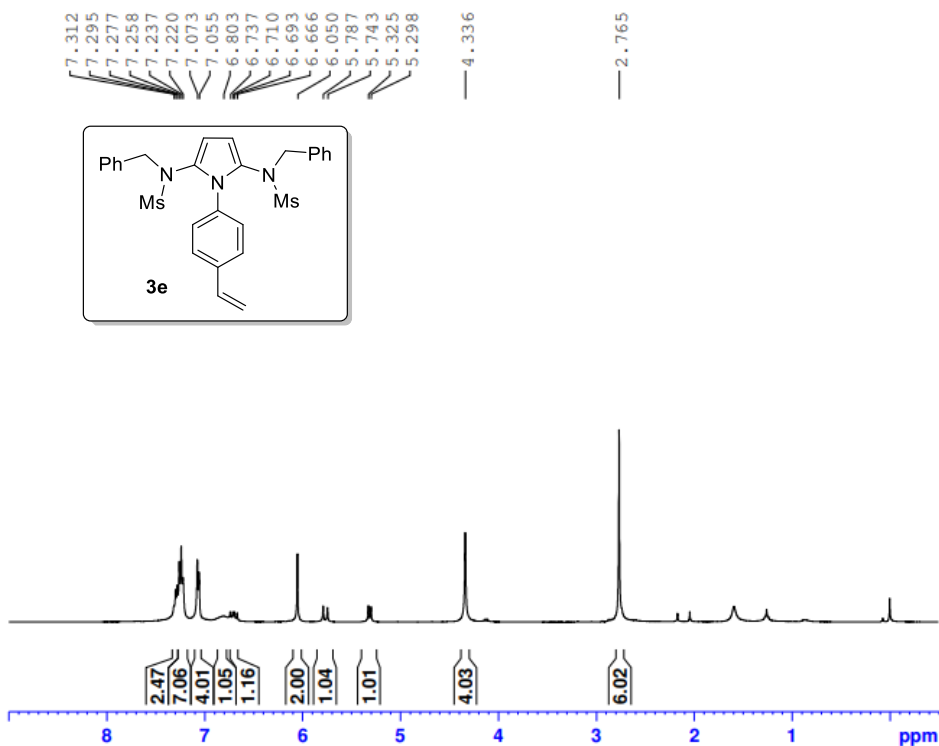

Current Data Parameters  
 NAME 1h  
 EXPNO 580  
 PROCNO 1

F2 - Acquisition Parameters  
 Date\_ 20220527  
 Time 13.10  
 INSTRUM spect  
 PROBHD 5 mm PABBO BB/  
 PULPROG zg30  
 TD 65536  
 SOLVENT  $\text{CDCl}_3$   
 NS 8  
 DS 0  
 SWH 9615.385 Hz  
 FIDRES 0.146719 Hz  
 AQ 3.4078720 sec  
 RG 114.26  
 DW 52.000 usec  
 DE 6.50 usec  
 TE 300.0 K  
 D1 1.00000000 sec  
 TDO 1

===== CHANNEL f1 =====  
 SFO1 400.1629712 MHz  
 NUC1 1H  
 P1 13.20 usec  
 PLW1 13.00000000 W

F2 - Processing parameters  
 SI 65536  
 SF 400.1605094 MHz  
 WDW EM  
 SSB 0  
 LB 0.30 Hz  
 GB 0  
 PC 1.00

GR-21-36

 $^{13}\text{C}$  NMR,  $\text{CDCl}_3$ , 125 MHz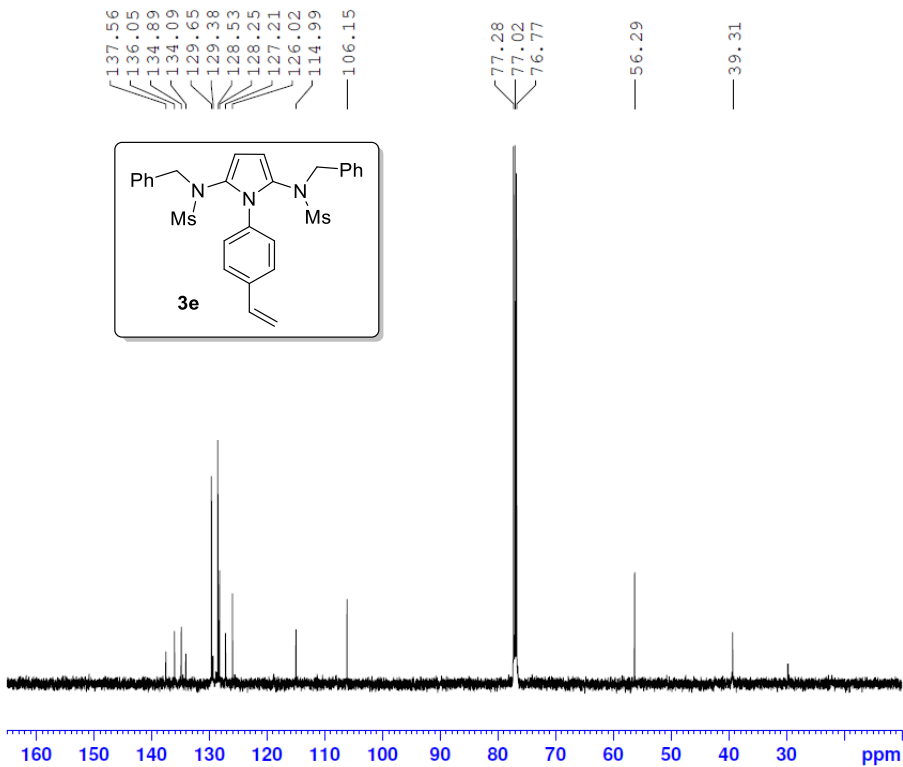

Current Data Parameters  
 NAME GR-21-36  
 EXPNO 380  
 PROCNO 1

F2 - Acquisition Parameters  
 Date\_ 20211116  
 Time 8.25  
 INSTRUM spect  
 PROBHD 5 mm PATXI 1H/  
 PULPROG zgpg30  
 TD 65536  
 SOLVENT  $\text{CDCl}_3$   
 NS 1024  
 DS 4  
 SWH 29761.904 Hz  
 FIDRES 0.454131 Hz  
 AQ 1.1010048 sec  
 RG 56.22  
 DW 16.800 usec  
 DE 6.50 usec  
 TE 303.0 K  
 D1 2.00000000 sec  
 D11 0.03000000 sec  
 TDO 1

===== CHANNEL f1 =====  
 SFO1 125.9077573 MHz  
 NUC1 13C  
 P1 9.23 usec  
 PLW1 244.00000000 W

===== CHANNEL f2 =====  
 SFO2 500.6783527 MHz  
 NUC2 1H  
 CPDPRG[2] waltz16  
 PCPD2 80.00 usec  
 PLW2 13.60000038 W  
 PLW12 0.08840500 W  
 PLW13 0.05657900 W

F2 - Processing parameters  
 SI 32768  
 SF 125.8951680 MHz  
 WDW EM  
 SSB 0  
 LB 1.00 Hz  
 GB 0  
 PC 1.40

Sample Name HRMS21109DEC22 Position Vial 22 Instrument Name Instrument 1 User Name  
 Inj Vol 1 InjPosition SampleType Sample IRM Calibration Status Some Ions Missed  
 Data Filename GR-20-205D.d ACQ Method ISOCRATIC.m Comment Acquired Time 12/9/2021 1:09:38 PM

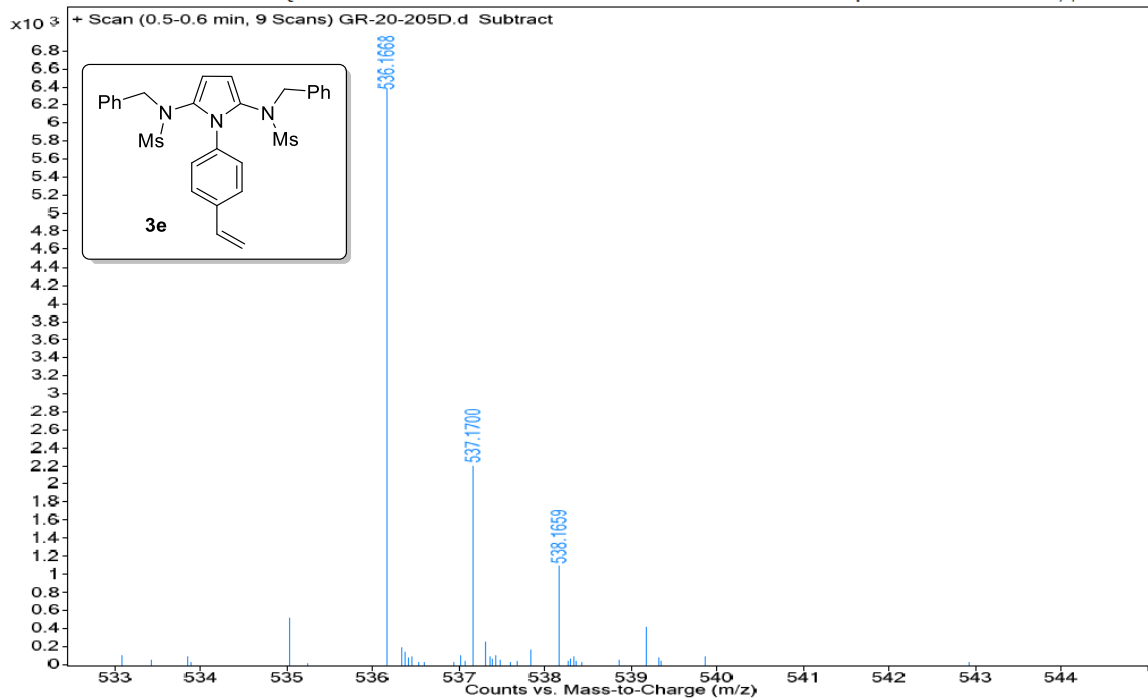

GR-21-50

<sup>1</sup>H NMR, CDCl<sub>3</sub>, 500 MHz

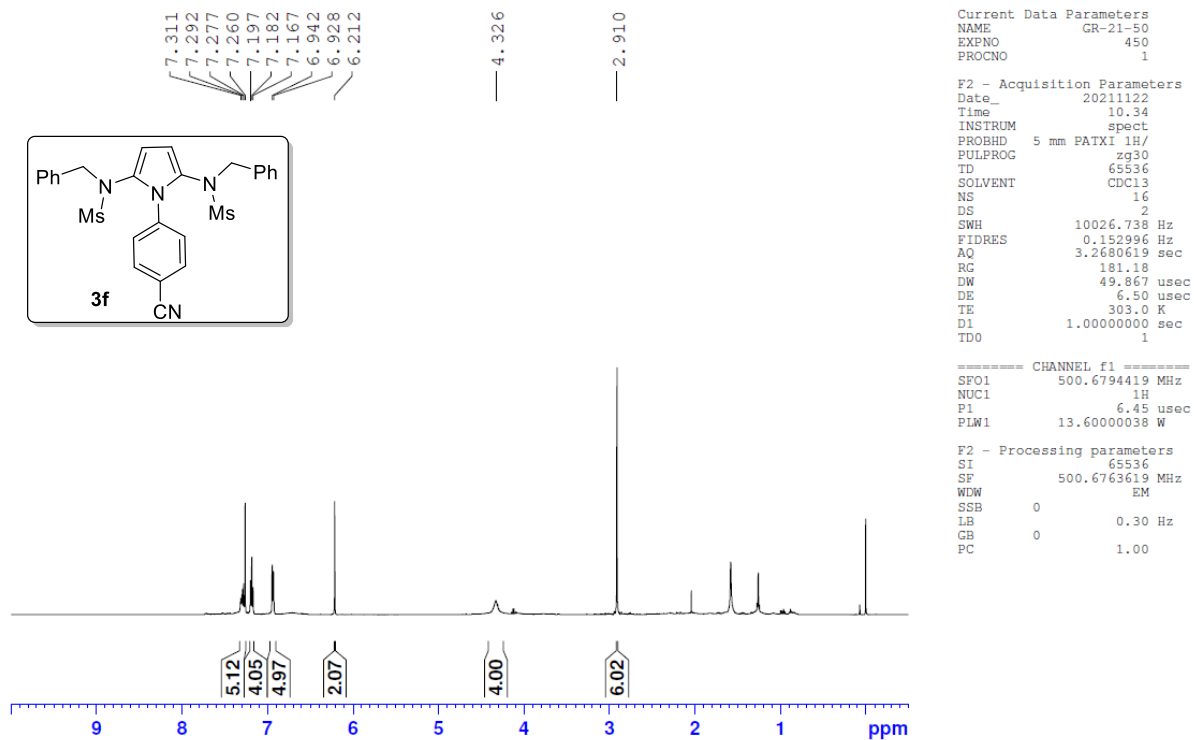

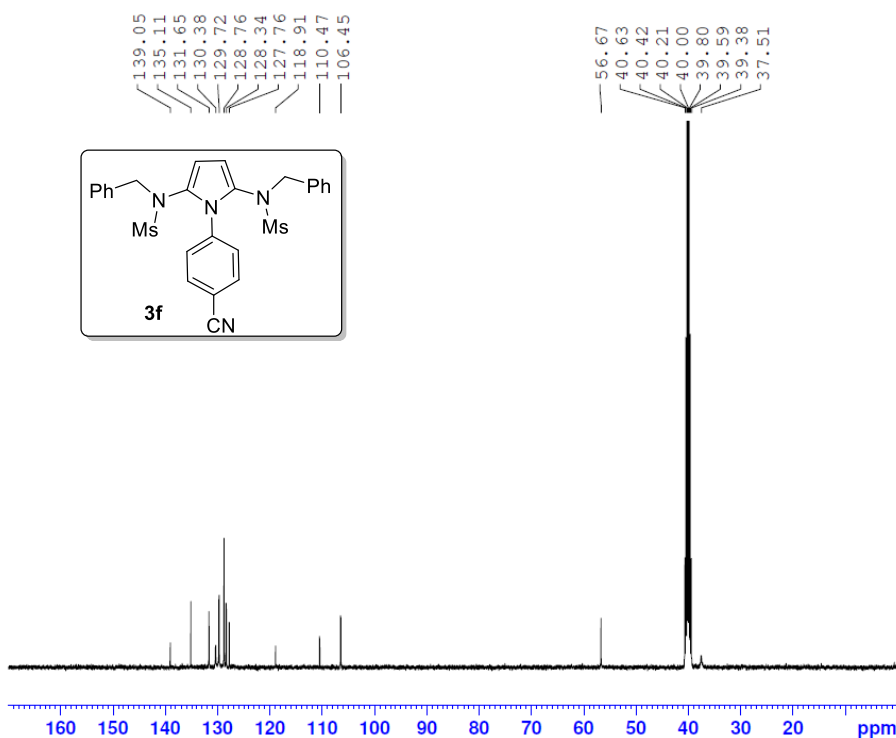

| Sample Name   | HRMS22119JAN30 | Position    | Vial 30     | Instrument Name | Instrument 1 | User Name              |
|---------------|----------------|-------------|-------------|-----------------|--------------|------------------------|
| Inj Vol       | 1              | InjPosition |             | SampleType      | Sample       | IRM Calibration Status |
| Data Filename | BK-02.d        | ACQ Method  | ISOCRATIC.m | Comment         |              | Some Ions Missed       |
|               |                |             |             |                 |              | Acquired Time          |
|               |                |             |             |                 |              | 1/19/2022 1:02:54 PM   |

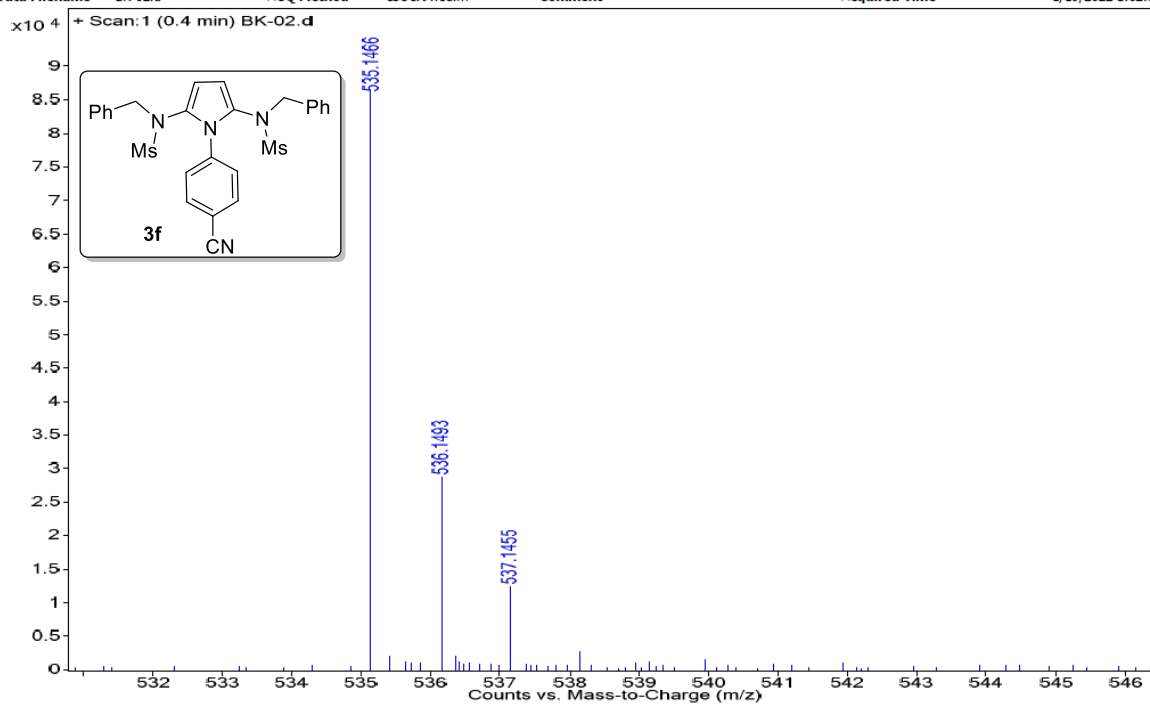

SH-21-23

 $^1\text{H}$  NMR,  $d_6$ -DMSO, 400 MHz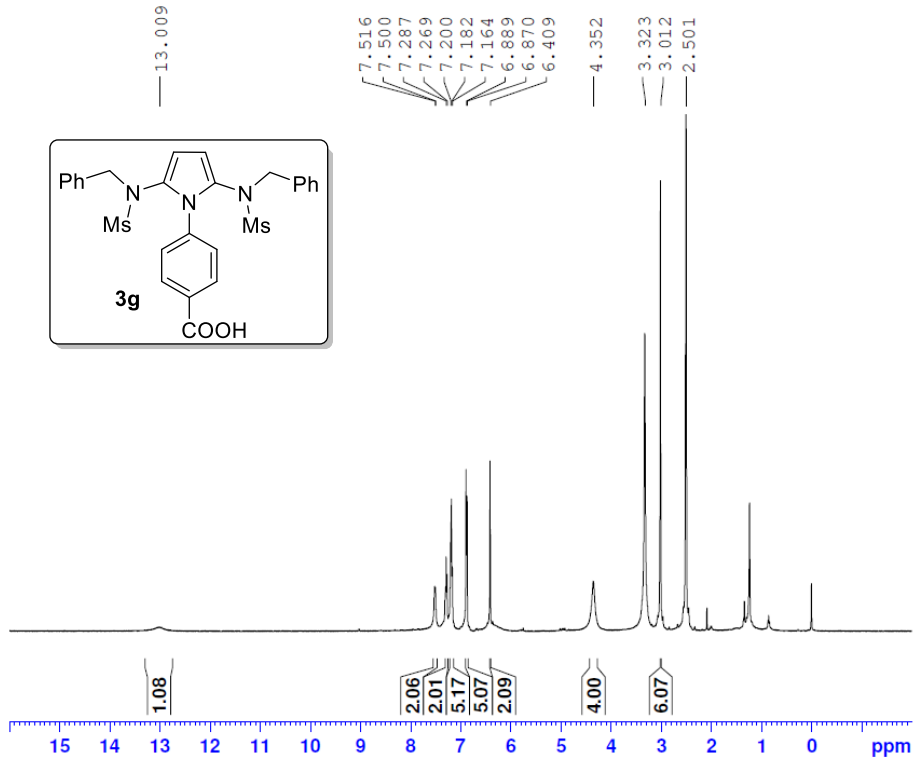

```

Current Data Parameters
NAME      sh-21-23
EXPNO    380
PROCNO   1

F2 - Acquisition Parameters
Date_    20220208
Time     12.28
INSTRUM  spect
PROBHD   5 mm PABBO BB/
PULPROG  zg30
TD        65536
SOLVENT  DMSO
NS        8
DS        0
SWH       9615.385 Hz
FIDRES    0.146719 Hz
AQ        3.4078720 sec
RG        114.26
DW        52.000 usec
DE        6.50 usec
TE        300.0 K
D1        1.00000000 sec
TDO       1

===== CHANNEL f1 =====
SFO1     400.1629712 MHz
NUC1     1H
P1       13.20 usec
PLW1     13.00000000 W

F2 - Processing parameters
SI        65536
SF        400.1605021 MHz
WDW       EM
SSB       0
LB        0.30 Hz
GB        0
PC        1.00

```

SH-21-23

 $^{13}\text{C}$  NMR,  $d_6$ -DMSO, 101 MHz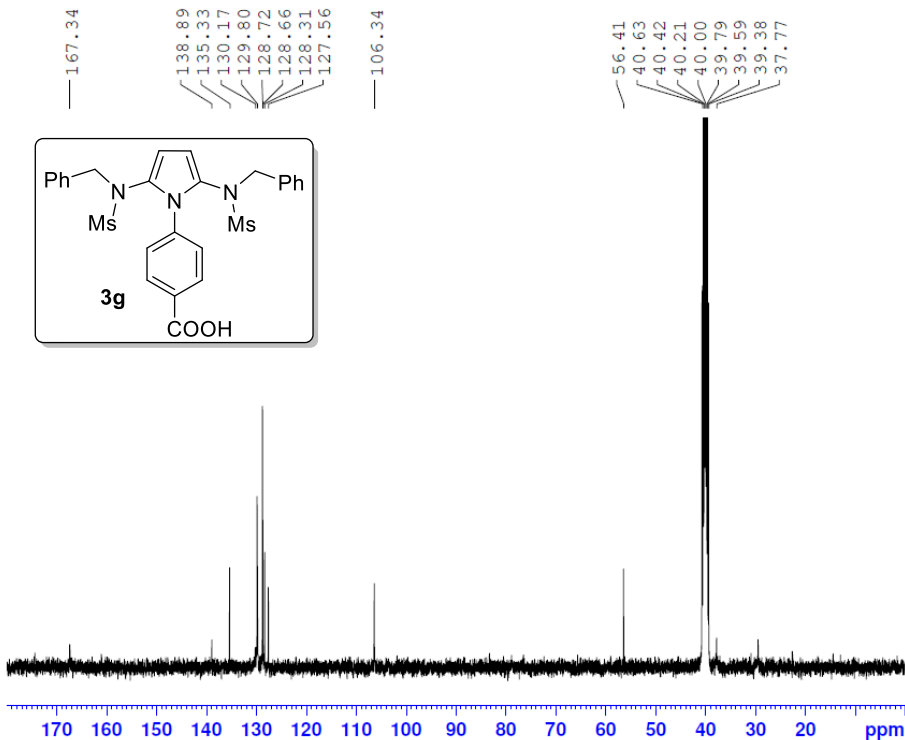

```

Current Data Parameters
NAME      sh-21-23
EXPNO    370
PROCNO   1

F2 - Acquisition Parameters
Date_    20220210
Time     10.25
INSTRUM  spect
PROBHD   5 mm PABBO BB/
PULPROG  zgpg30
TD        65536
SOLVENT  DMSO
NS        2048
DS        0
SWH       24038.461 Hz
FIDRES    0.366798 Hz
AQ        1.3631488 sec
RG        201.48
DW        20.800 usec
DE        6.50 usec
TE        300.1 K
D1        2.00000000 sec
D11      0.03000000 sec
TDO       1

===== CHANNEL f1 =====
SFO1     100.6304993 MHz
NUC1     13C
P1       9.90 usec
PLW1     53.00000000 W

===== CHANNEL f2 =====
SFO2     400.1621006 MHz
NUC2     1H
CPDPRG[2] waltz16
PCPD2    90.00 usec
PLW2     13.00000000 W
PLW12    0.27963999 W
PLW13    0.22651000 W

F2 - Processing parameters
SI        32768
SF        100.6204380 MHz
WDW       EM
SSB       0
LB        1.00 Hz
GB        0
PC        1.40

```



Sample Name GR-22-22 Position Vial 23 Instrument Name Instrument 1 User Name  
 Inj Vol 1 InjPosition Sample IRM Calibration Status Some Ions Missed  
 Data Filename HRMS22I23MAR23.d ACQ Method ISOCRATIC.m Comment Acquired Time 3/23/2022 12:37:52 PM

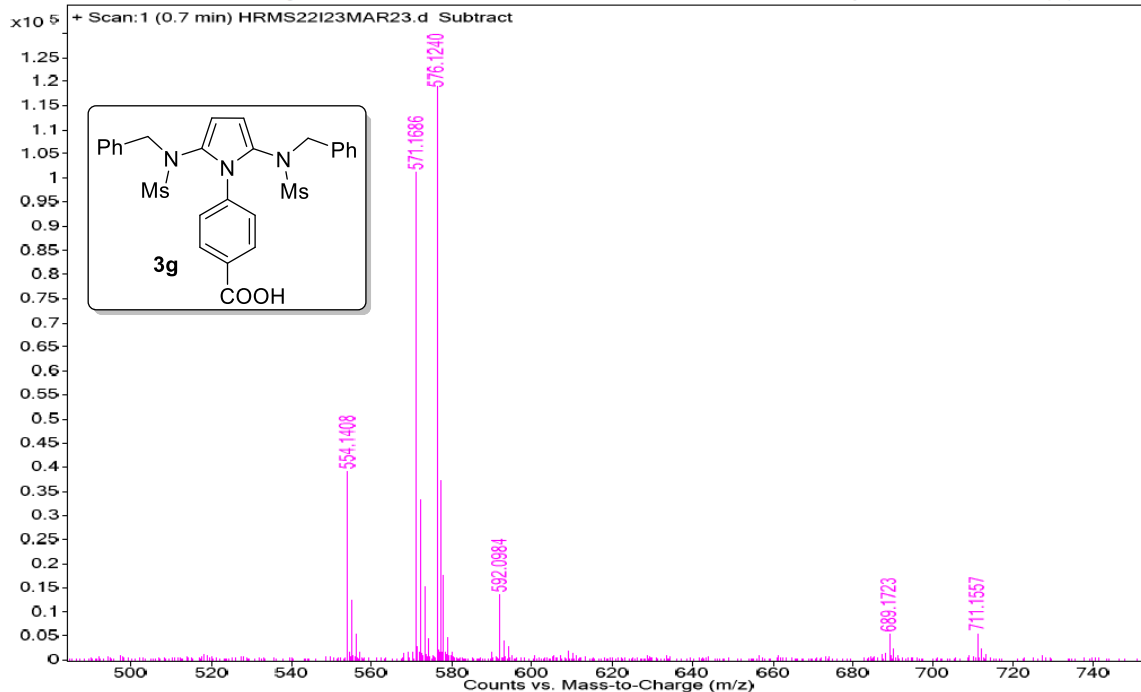

$^1\text{H NMR}$ ,  $d_6$ -DMSO, 400 MHz

GR-21-67

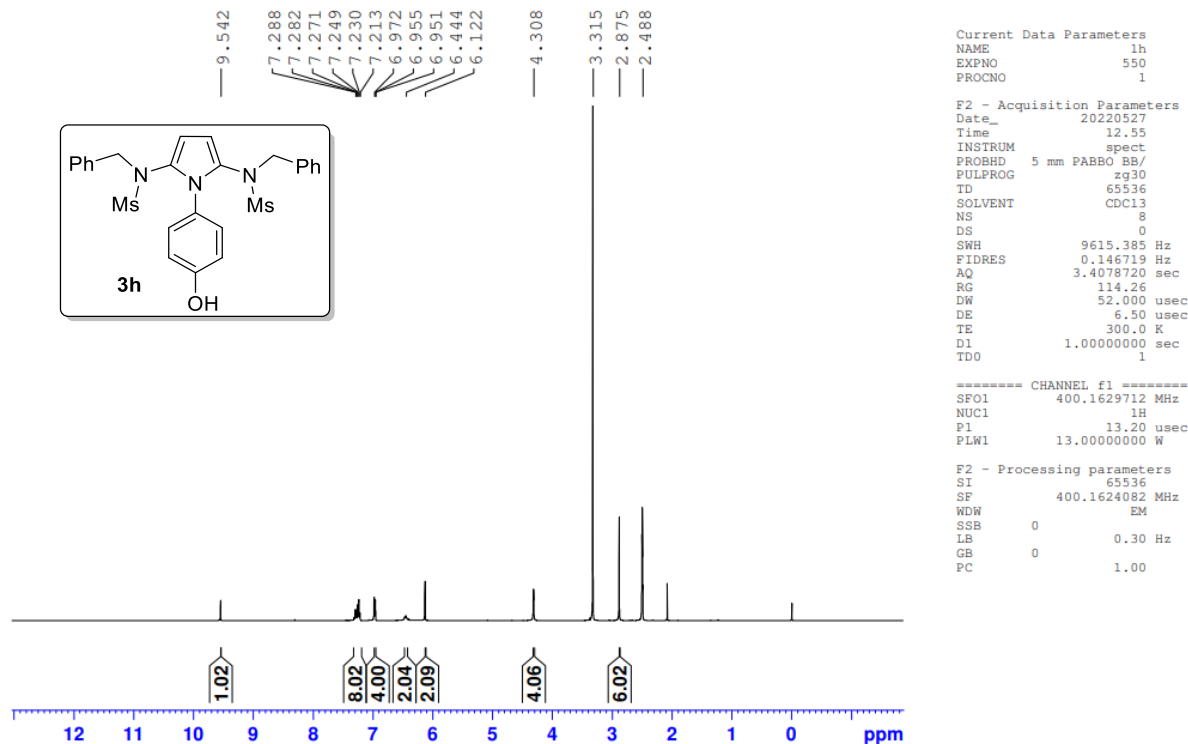

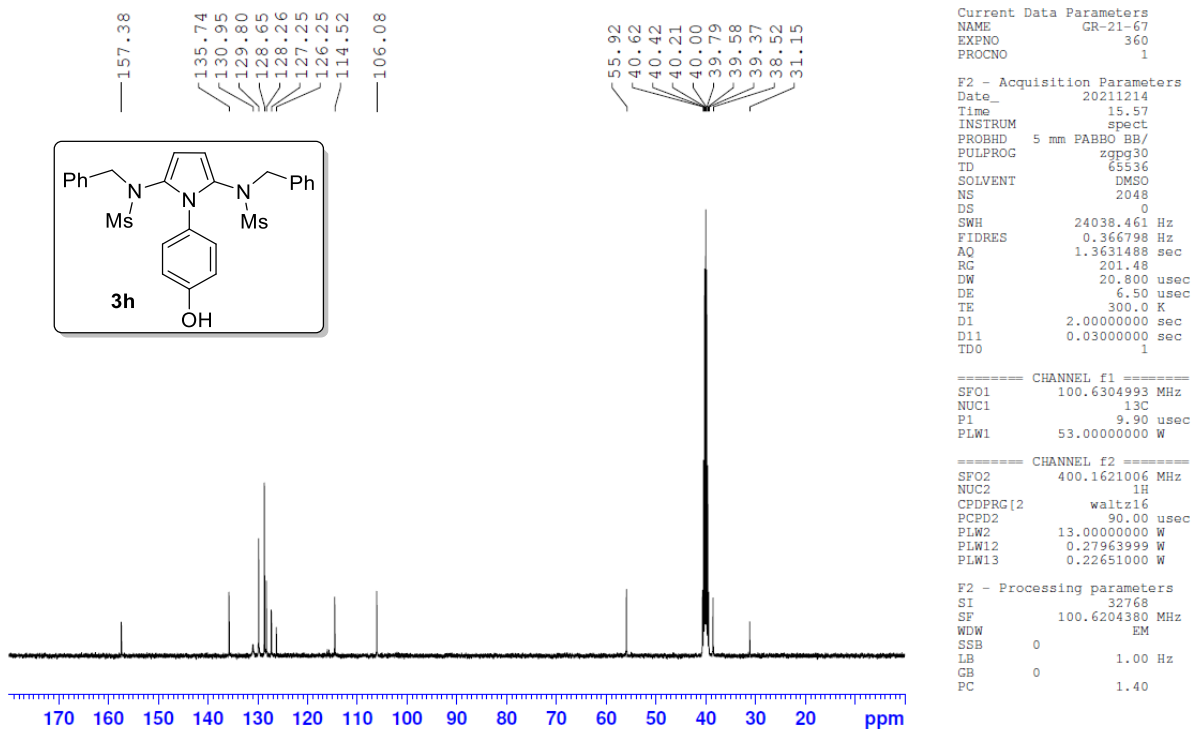

| Sample Name   | HRMS22120JAN22 | Position    | Vial 22     | Instrument Name | Instrument 1 | User Name              |                       |
|---------------|----------------|-------------|-------------|-----------------|--------------|------------------------|-----------------------|
| Inj Vol       | 1              | InjPosition |             | SampleType      | Sample       | IRM Calibration Status | Some Ions Missed      |
| Data Filename | SH-20-42.d     | ACQ Method  | ISOCRATIC.m | Comment         |              | Acquired Time          | 1/20/2022 12:28:29 PM |

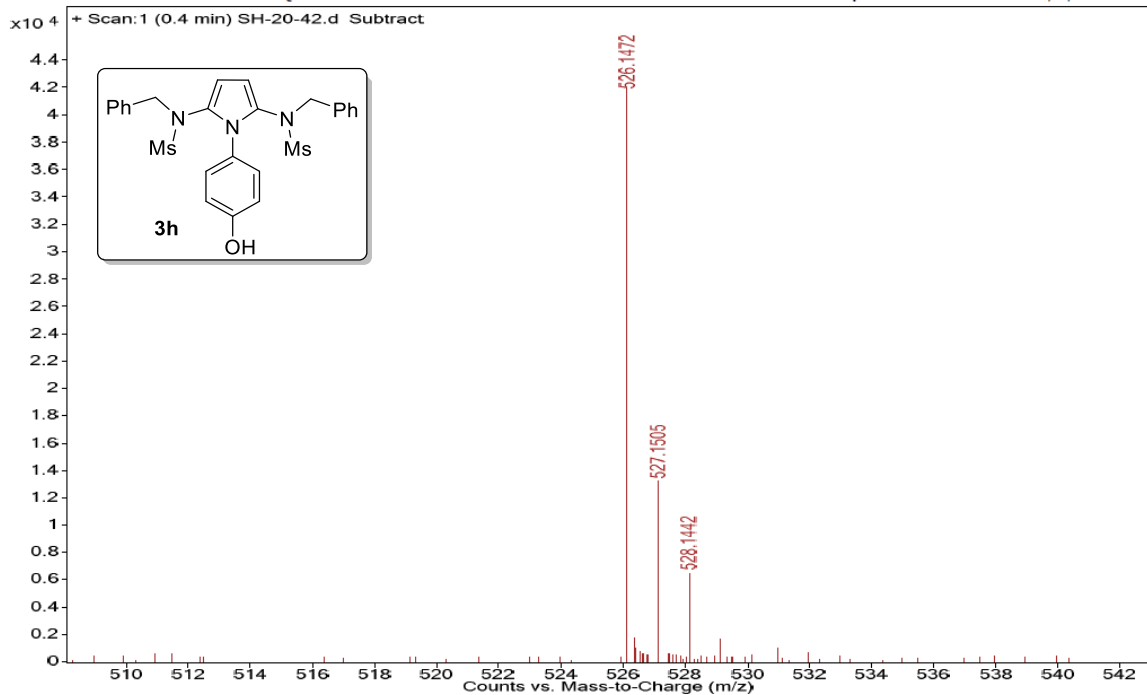

GR-21-14

 $^1\text{H}$  NMR,  $\text{CDCl}_3$ , 500 MHz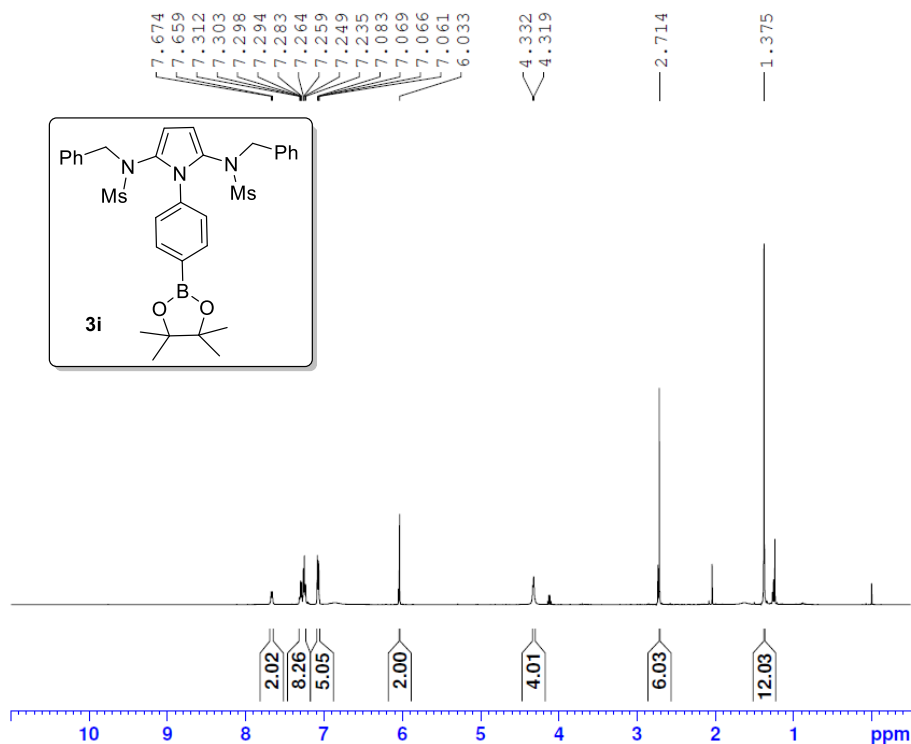

Current Data Parameters  
 NAME GR-21-14  
 EXPNO 390  
 PROCNO 1

F2 - Acquisition Parameters  
 Date\_ 20211028  
 Time 14.37  
 INSTRUM spect  
 PROBHD 5 mm PATXI 1H/  
 PULPROG zg30  
 TD 65536  
 SOLVENT  $\text{CDCl}_3$   
 NS 16  
 DS 2  
 SWH 10026.738 Hz  
 FIDRES 0.152996 Hz  
 AQ 3.2680619 sec  
 RG 69.83  
 DW 49.867 usec  
 DE 6.50 usec  
 TE 303.0 K  
 D1 1.00000000 sec  
 TD0 1

===== CHANNEL f1 =====  
 SFO1 500.6794419 MHz  
 NUC1 1H  
 P1 6.45 usec  
 PLW1 13.6000038 W

F2 - Processing parameters  
 SI 65536  
 SF 500.6763622 MHz  
 WDW EM  
 SSB 0  
 LB 0.30 Hz  
 GB 0  
 PC 1.00

GR-21-14

 $^{13}\text{C}$  NMR,  $\text{CDCl}_3$ , 125 MHz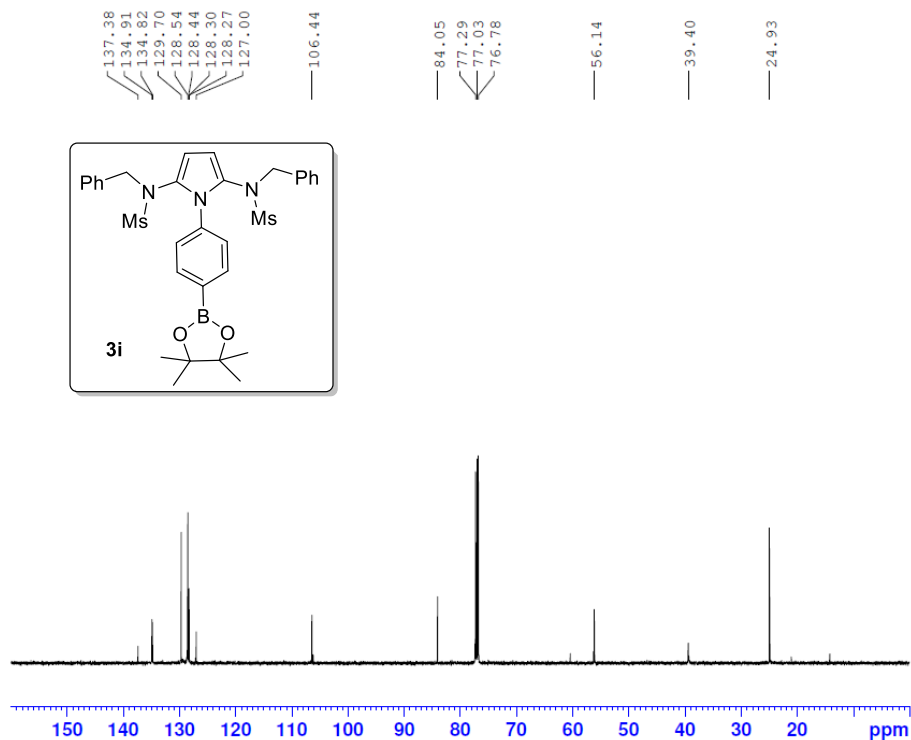

Current Data Parameters  
 NAME Desktop  
 EXPNO 400  
 PROCNO 1

F2 - Acquisition Parameters  
 Date\_ 20211028  
 Time 15.43  
 INSTRUM spect  
 PROBHD 5 mm PATXI 1H/  
 PULPROG zgpg30  
 TD 65536  
 SOLVENT  $\text{CDCl}_3$   
 NS 2048  
 DS 4  
 SWH 29761.904 Hz  
 FIDRES 0.454131 Hz  
 AQ 1.1010048 sec  
 RG 56.22  
 DW 16.800 usec  
 DE 6.50 usec  
 TE 303.0 K  
 D1 2.00000000 sec  
 D11 0.03000000 sec  
 TD0 1

===== CHANNEL f1 =====  
 SFO1 125.9077573 MHz  
 NUC1 13C  
 P1 9.23 usec  
 PLW1 244.00000000 W

===== CHANNEL f2 =====  
 SFO2 500.6783527 MHz  
 NUC2 1H  
 CPDPRG[2] waltz16  
 PCPD2 80.00 usec  
 PLW2 13.6000038 W  
 PLW12 0.08840500 W  
 PLW13 0.05657900 W

F2 - Processing parameters  
 SI 32768  
 SF 125.8951680 MHz  
 WDW EM  
 SSB 0  
 LB 1.00 Hz  
 GB 0  
 PC 1.40

|               |                |             |             |                 |              |                        |                        |
|---------------|----------------|-------------|-------------|-----------------|--------------|------------------------|------------------------|
| Sample Name   | HRMS21113DEC13 | Position    | Vial 13     | Instrument Name | Instrument 1 | User Name              |                        |
| Inj Vol       | 1              | InjPosition |             | SampleType      | Sample       | IRM Calibration Status | Some Ions Missed       |
| Data Filename | SH-20-452.d    | ACQ Method  | ISOCRATIC.m | Comment         |              | Acquired Time          | 12/13/2021 12:23:20 PM |

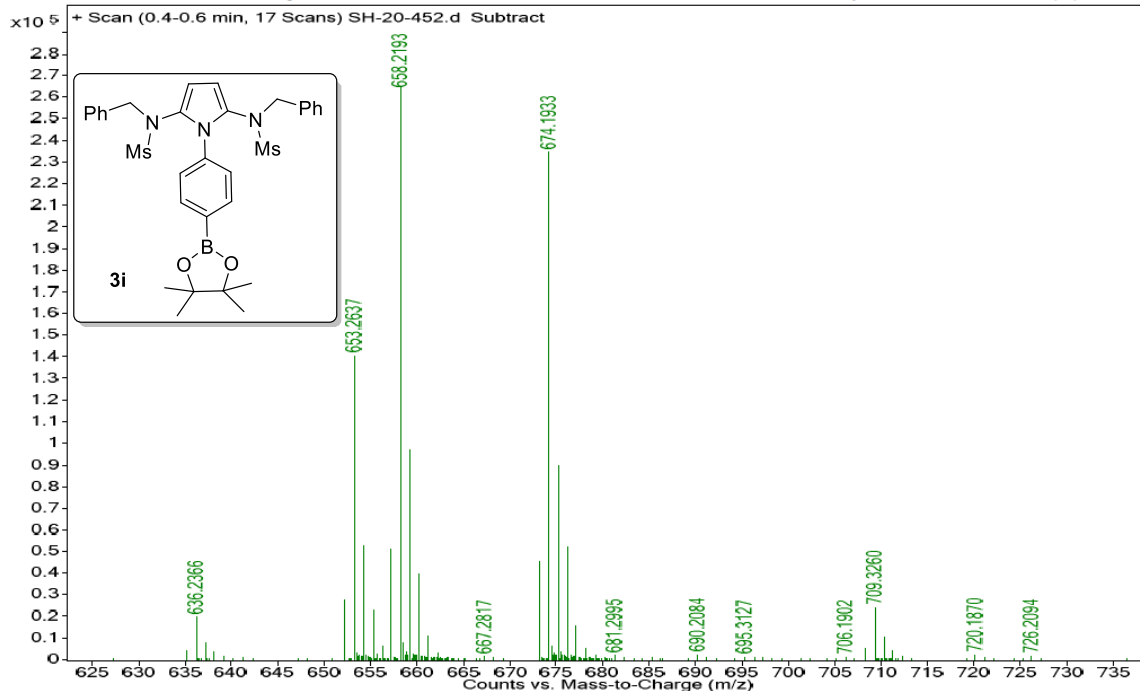

GR-21-16

<sup>1</sup>H NMR, CDCl<sub>3</sub>, 500 MHz

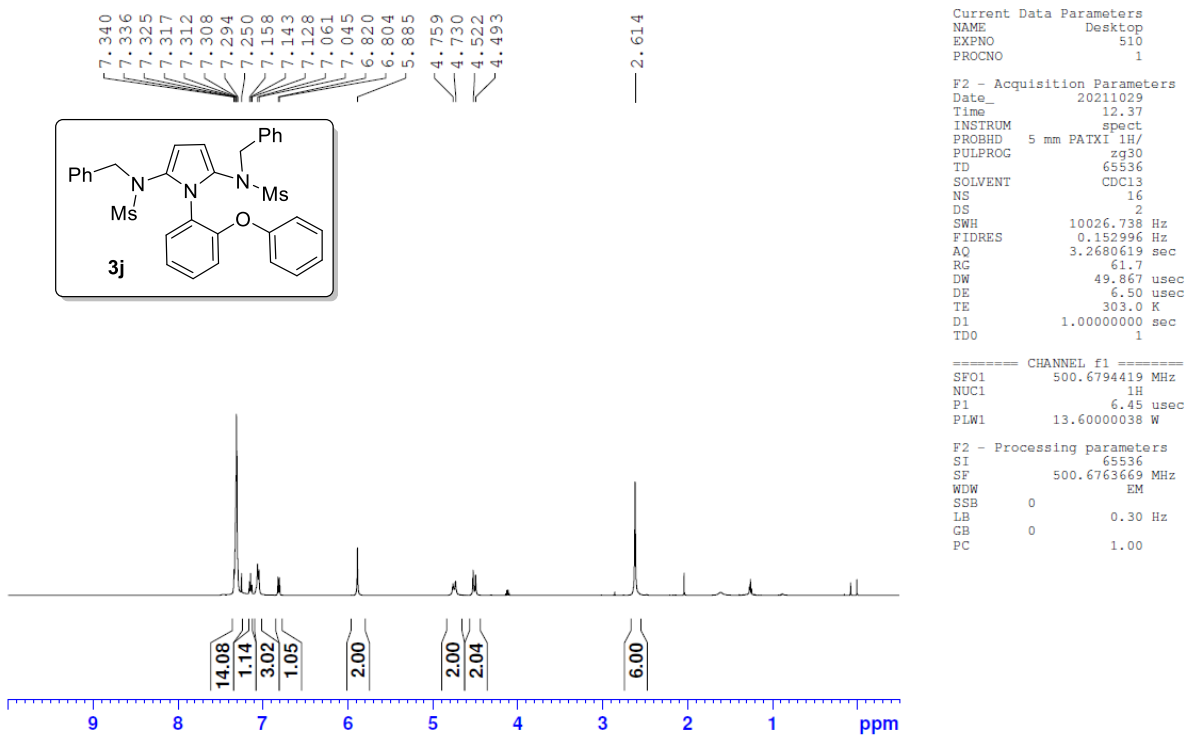

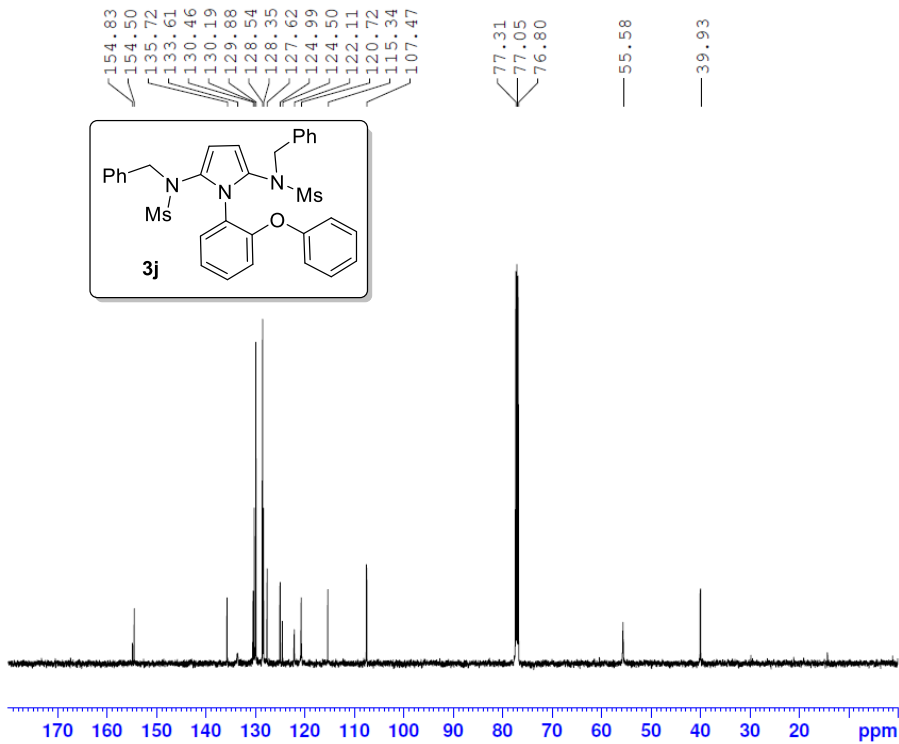

Current Data Parameters  
 NAME GR-21-16  
 EXPNO 520  
 PROCNO 1

F2 - Acquisition Parameters  
 Date\_ 20211029  
 Time 12.47  
 INSTRUM spect  
 PROBHD 5 mm PATXI 1H/  
 PULPROG zgpg30  
 TD 65536  
 SOLVENT  $\text{CDCl}_3$   
 NS 2048  
 DS 4  
 SWH 29761.904 Hz  
 FIDRES 0.454131 Hz  
 AQ 1.1010048 sec  
 RG 56.22  
 DW 16.800 usec  
 DE 6.50 usec  
 TE 303.0 K  
 D1 2.00000000 sec  
 D11 0.03000000 sec  
 TDO 1

==== CHANNEL f1 =====  
 SF01 125.9077573 MHz  
 NUC1 13C  
 P1 9.23 usec  
 PLW1 244.00000000 W

==== CHANNEL f2 =====  
 SF02 500.6783527 MHz  
 NUC2 1H  
 CPDPRG2 waltz16  
 PCPD2 80.00 usec  
 PLW2 13.60000038 W  
 PLW12 0.08840500 W  
 PLW13 0.05657900 W

F2 - Processing parameters  
 SI 32768  
 SF 125.8951680 MHz  
 WDW EM  
 SSB 0  
 LB 2.00 Hz  
 GB 0  
 PC 1.40

| Sample Name   | HRMS22104JAN21 | Position    | Vial 21     | Instrument Name | Instrument 1 | User Name              |                      |
|---------------|----------------|-------------|-------------|-----------------|--------------|------------------------|----------------------|
| Inj Vol       | 1              | InjPosition |             | SampleType      | Sample       | IRM Calibration Status | Some Ions Missed     |
| Data Filename | SH-20-334.d    | ACQ Method  | ISOCRATIC.m | Comment         |              | Acquired Time          | 1/4/2022 12:29:35 PM |

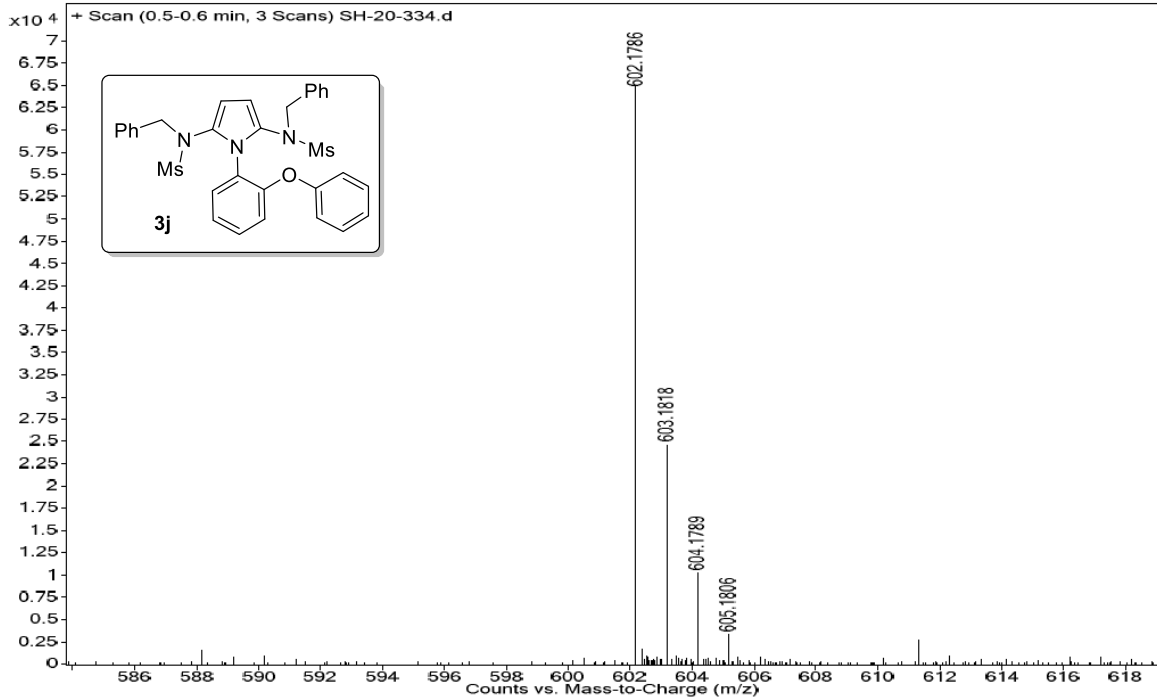

GR-20-232

 $^1\text{H}$  NMR,  $\text{CDCl}_3$ , 400 MHz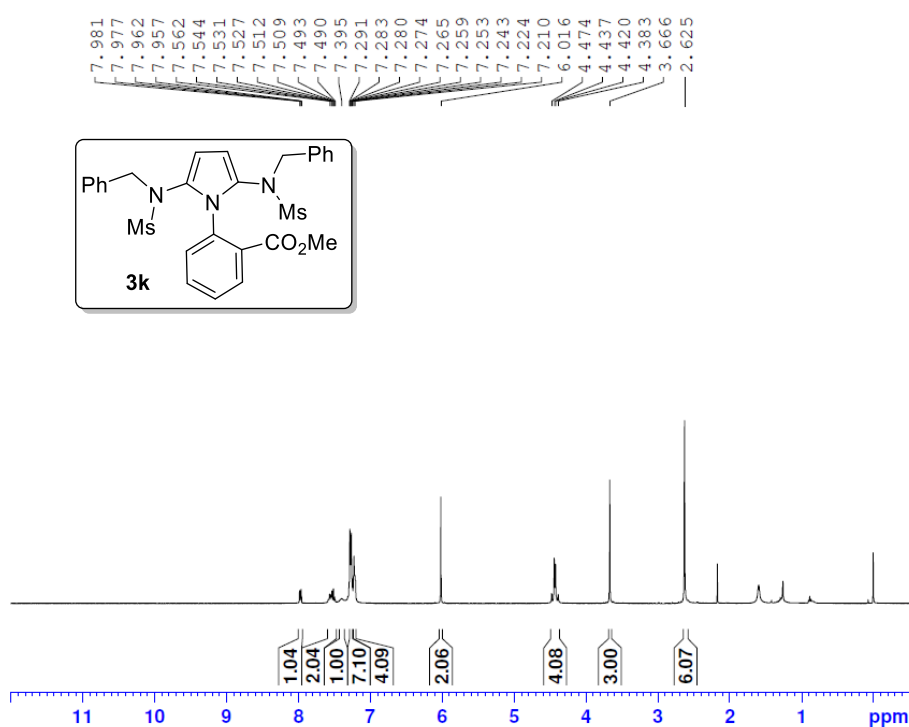

Current Data Parameters  
 NAME GR-20-232  
 EXPNO 400  
 PROCNO 1

F2 - Acquisition Parameters  
 Date\_ 20211210  
 Time 12.33  
 INSTRUM spect  
 PROBHD 5 mm PABBO BB/  
 PULPROG zg30  
 TD 65536  
 SOLVENT  $\text{CDCl}_3$   
 NS 8  
 DS 0  
 SWH 9615.385 Hz  
 FIDRES 0.146719 Hz  
 AQ 3.4078720 sec  
 RG 129.57  
 DW 52.000 usec  
 DE 6.50 usec  
 TE 300.0 K  
 D1 1.00000000 sec  
 TD0 1

===== CHANNEL f1 =====  
 SFO1 400.1629712 MHz  
 NUC1  $^1\text{H}$   
 P1 13.20 usec  
 PLW1 13.00000000 W

F2 - Processing parameters  
 SI 65536  
 SF 400.1605097 MHz  
 WDW EM  
 SSB 0  
 LB 0.30 Hz  
 GB 0  
 PC 1.00

GR-20-232

 $^{13}\text{C}$  NMR,  $\text{CDCl}_3$ , 125 MHz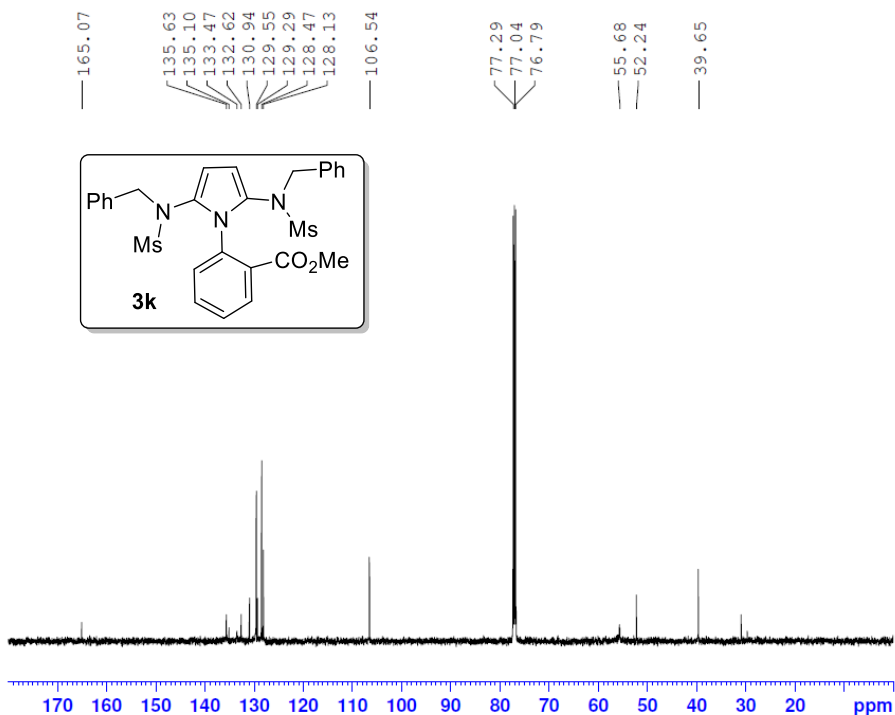

Current Data Parameters  
 NAME GR-20-232  
 EXPNO 370  
 PROCNO 1

F2 - Acquisition Parameters  
 Date\_ 20211214  
 Time 8.44  
 INSTRUM spect  
 PROBHD 5 mm PATXI 1H/  
 PULPROG zgpg30  
 TD 65536  
 SOLVENT  $\text{CDCl}_3$   
 NS 4  
 DS 2048  
 SWH 29761.904 Hz  
 FIDRES 0.454131 Hz  
 AQ 1.1010048 sec  
 RG 107.78  
 DW 16.800 usec  
 DE 6.50 usec  
 TE 300.0 K  
 D1 2.00000000 sec  
 D11 0.03000000 sec  
 TD0 1

===== CHANNEL f1 =====  
 SFO1 125.9077573 MHz  
 NUC1  $^{13}\text{C}$   
 P1 9.23 usec  
 PLW1 244.00000000 W

===== CHANNEL f2 =====  
 SFO2 500.6783527 MHz  
 NUC2  $^1\text{H}$   
 CPDPRG[2] waltz16  
 PCPD2 80.00 usec  
 PLW2 13.60000038 W  
 PLW12 0.08840500 W  
 PLW13 0.05657900 W

F2 - Processing parameters  
 SI 32768  
 SF 125.8951680 MHz  
 WDW EM  
 SSB 0  
 LB 2.00 Hz  
 GB 0  
 PC 1.40

Sample Name HRMS22I04JAN20 Position Vial 20 Instrument Name Instrument 1 User Name  
 Inj Vol 1 InjPosition Instrument 1 Sample IRM Calibration Status Some Ions Missed  
 Data Filename SH-20-319.d ACQ Method ISOCRATIC.m Comment Sample Type Sample Acquired Time 1/4/2022 12:27:02 PM

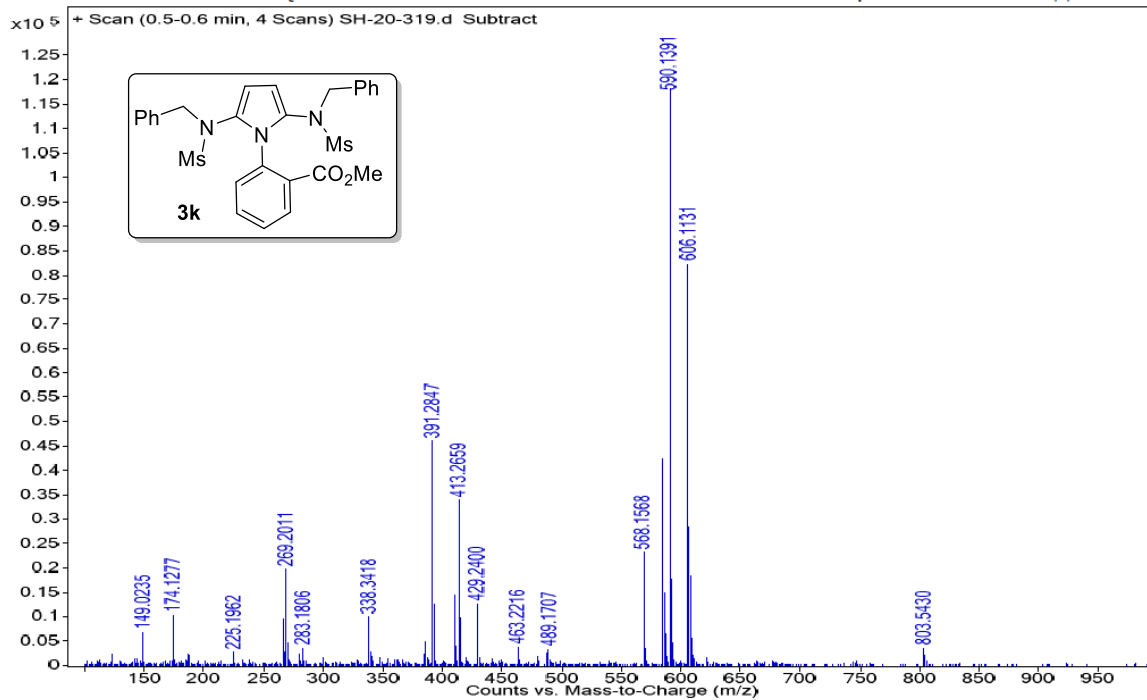

SH-21-72

<sup>1</sup>H NMR, CDCl<sub>3</sub>, 400 MHz

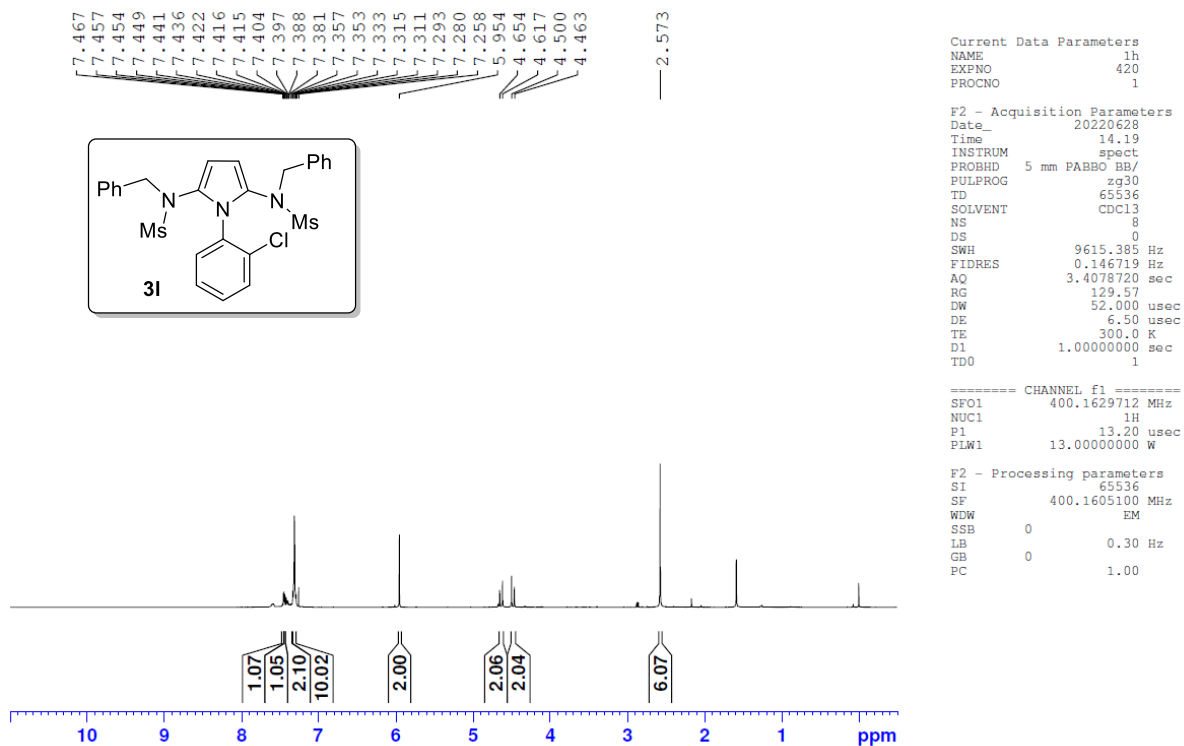

SH-21-72

<sup>13</sup>C NMR, CDCl<sub>3</sub>, 101 MHz

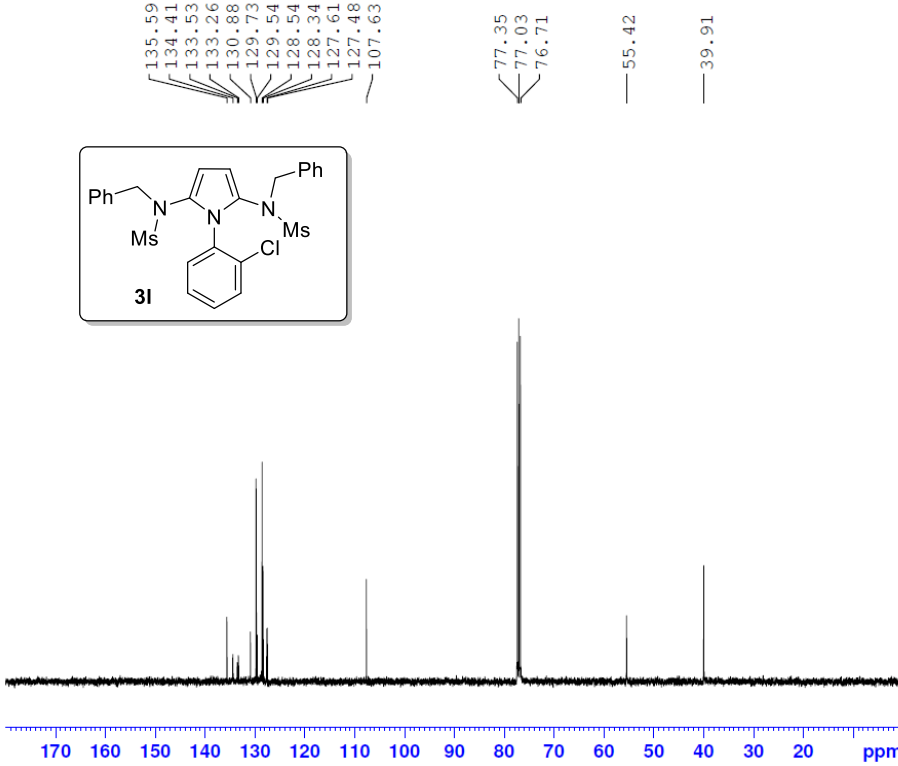

```

Current Data Parameters
NAME          13c
EXPNO         430
PROCNO        1

F2 - Acquisition Parameters
Date_         20220628
Time          14.25
INSTRUM       spect
PROBHD        5 mm PABBO BB/
PULPROG       zgpg30
TD            65536
SOLVENT       CDCl3
NS            2048
DS            0
SWH           24038.461 Hz
FIDRES        0.366798 Hz
AQ            1.3631488 sec
RG            201.48
DW            20.800 usec
DE            6.50 usec
TE            300.0 K
D1            1.00000000 sec
D11           0.03000000 sec
TD0           1

===== CHANNEL f1 =====
SFO1          100.6304993 MHz
NUC1           13C
P1            9.90 usec
PLW1          53.00000000 W

===== CHANNEL f2 =====
SFO2          400.1621006 MHz
NUC2           1H
CPDPRG[2]     waltz16
PCPD2         90.00 usec
PLW2          13.00000000 W
PLW12         0.27963999 W
PLW13         0.22651000 W

F2 - Processing parameters
SI            32768
SF            100.6204380 MHz
WDW           EM
SSB           0
LB            1.00 Hz
GB            0
PC            1.40
    
```

| Sample Name   | SH-21-09         | Position    | Vial 5      | Instrument Name | Instrument 1 | User Name     | IRM Calibration Status | Some Ions Missed     |
|---------------|------------------|-------------|-------------|-----------------|--------------|---------------|------------------------|----------------------|
| Inj Vol       | 1                | InjPosition |             | SampleType      | Sample       |               |                        |                      |
| Data Filename | HRMS22101JUL05.d | ACQ Method  | ISOCRATIC.m | Comment         |              | Acquired Time |                        | 7/1/2022 12:19:51 PM |

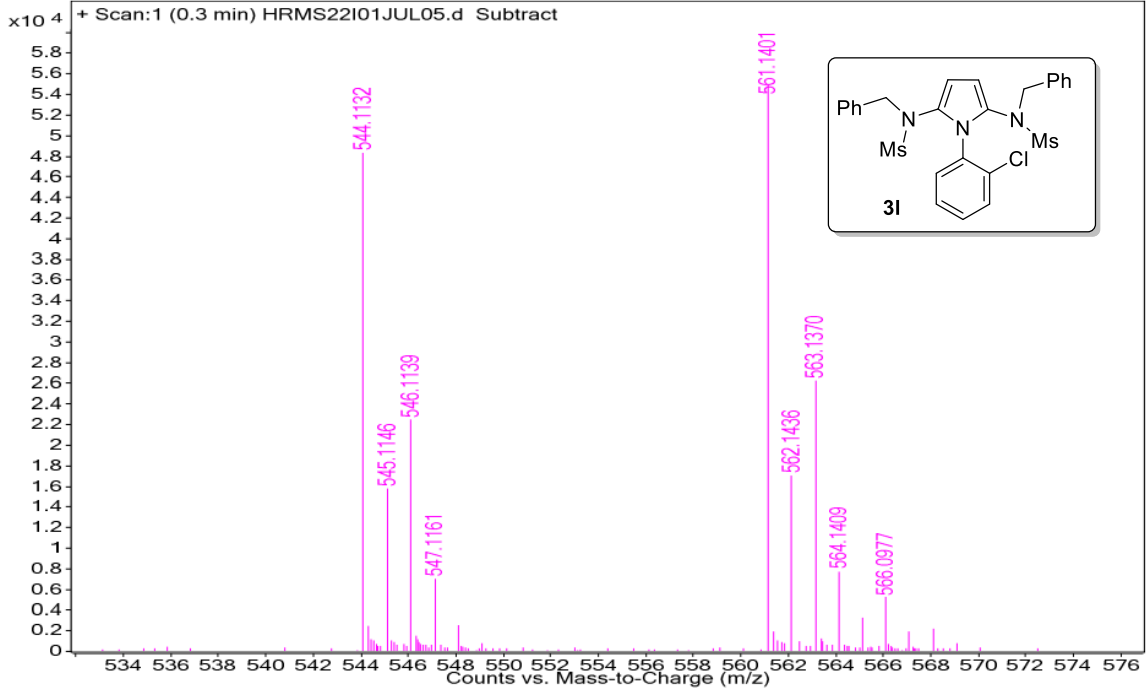



<sup>1</sup>H NMR, CDCl<sub>3</sub>, 400 MHz

GR-21-68

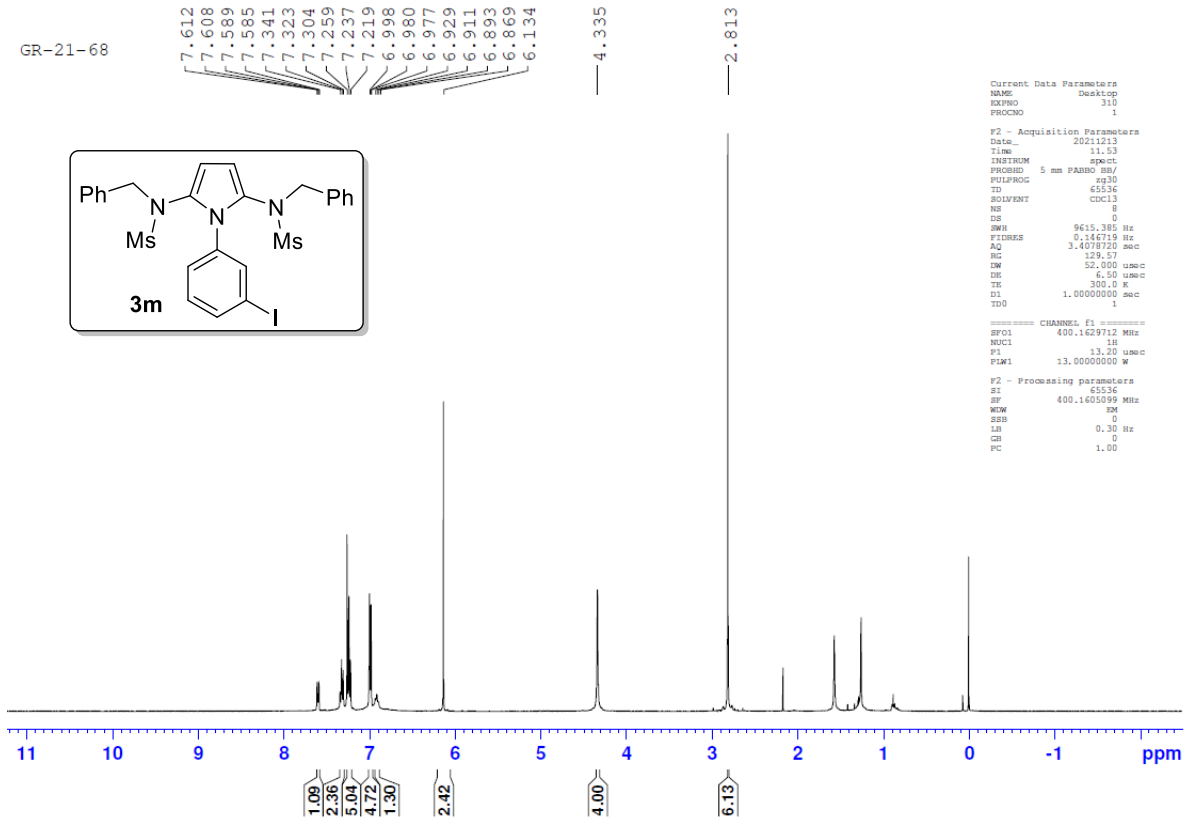

GR-21-68

<sup>13</sup>C NMR, CDCl<sub>3</sub>, 125 MHz

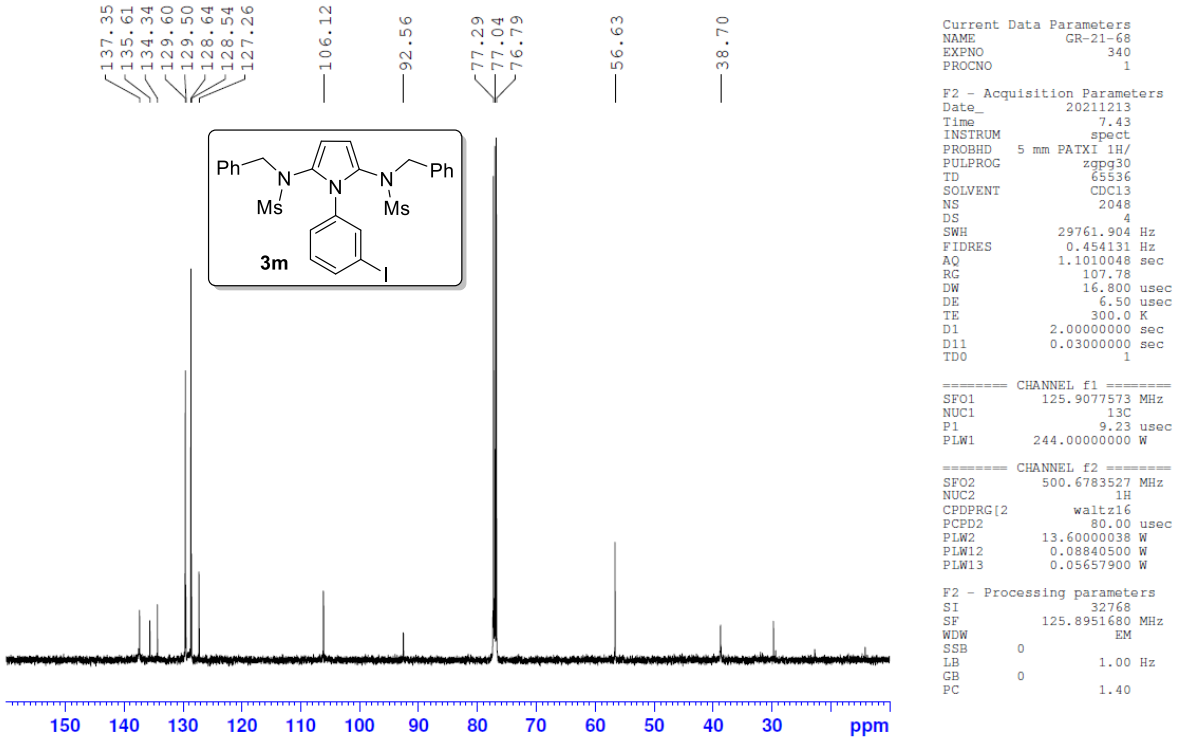

Sample Name HRMS21115DEC22 Position Vial 22 Instrument Name Instrument 1 User Name  
 Inj Vol 1 InjPosition Instrument 1 Sample IRM Calibration Status Some Ions Missed  
 Data Filename GR-20-205D.d ACQ Method ISOCRATIC.m Comment Acquired Time 12/15/2021 1:40:37 PM

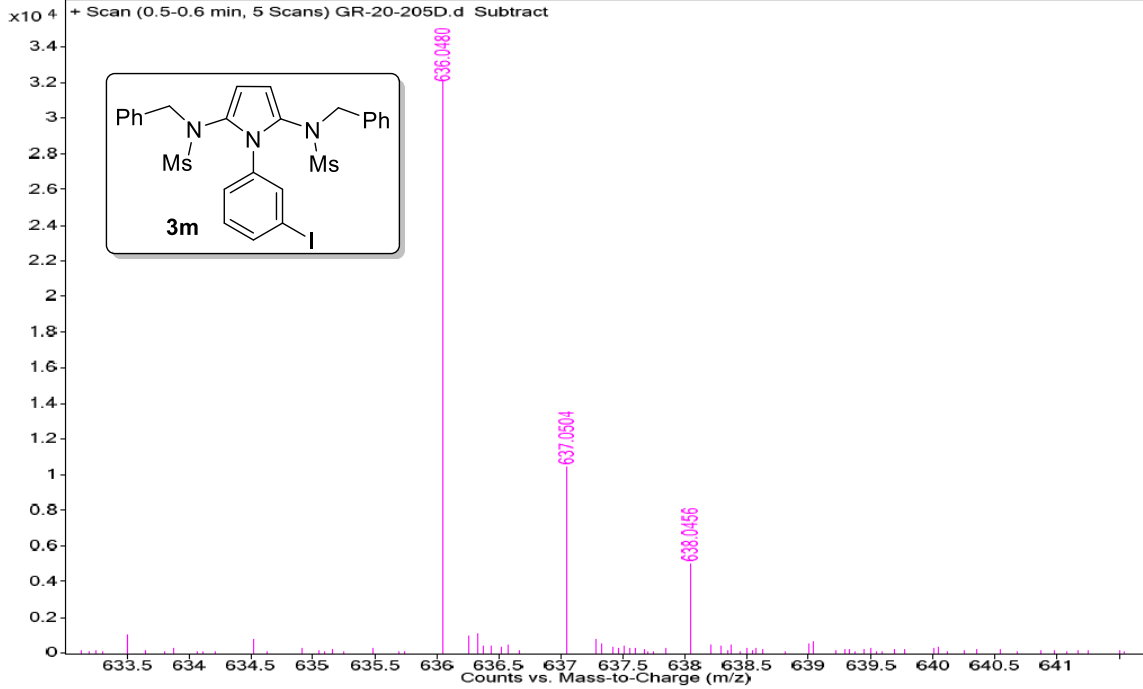

GR 21 09

<sup>1</sup>H NMR, CDCl<sub>3</sub>, 400 MHz

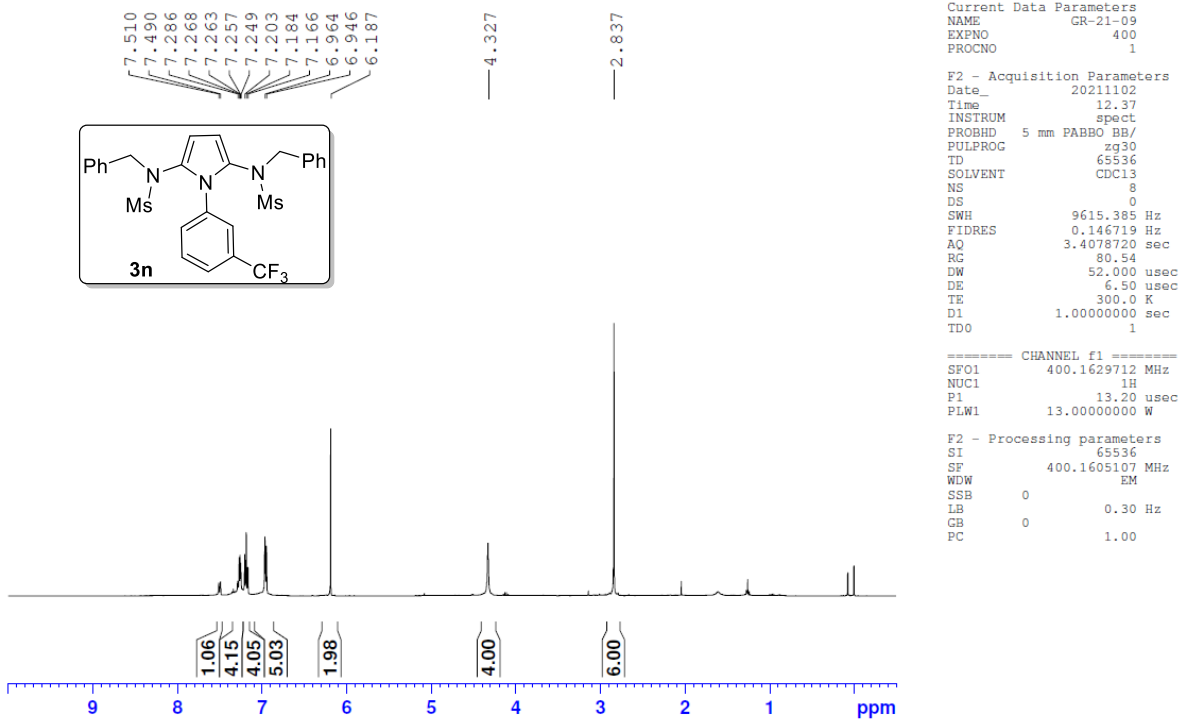

GR 21 09

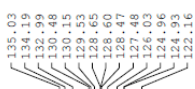

106.09

77.36  
77.01  
76.72

56.75

38.46

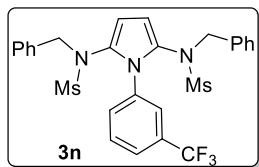 $^{13}\text{C}$  NMR,  $\text{CDCl}_3$ , 101 MHz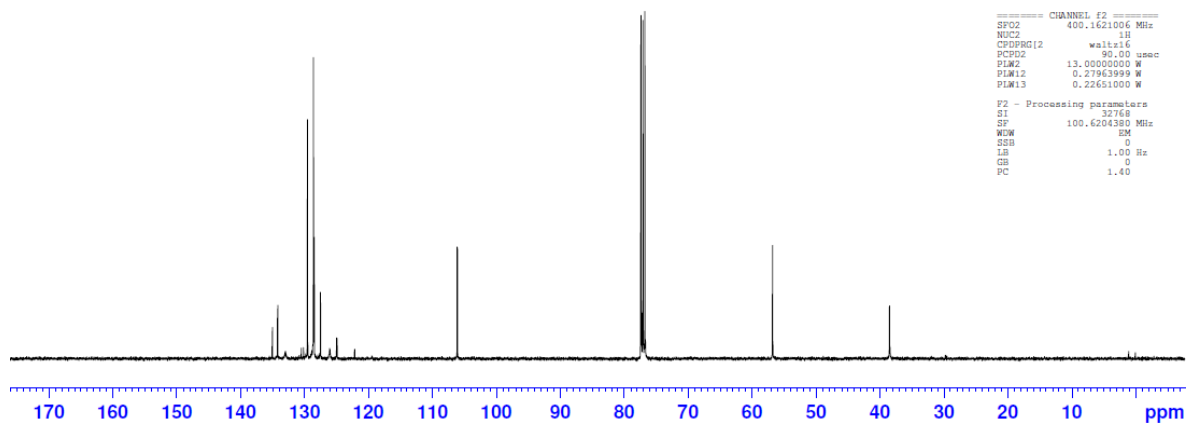

```

Current Data Parameters
NAME      Desktop
EXPNO    580
PROCNO   1

F2 - Acquisition Parameters
Date_    20211102
Time     12.48
INSTRUM  spect
PROBHD   5 mm PABBO BB/
PULPROG  zgpg30
TD       65536
SOLVENT  CDCl3
NS       1200
DS       0
SWH      24638.461 Hz
FIDRES   0.366798 Hz
AQ       1.3621488 sec
RG       201.48
DW       20.800 usec
DE       6.50 usec
TE       300.0 K
D1       2.0000000 sec
D11      0.0300000 sec
D12      0.0300000 sec
D13      0.0300000 sec
D14      0.0300000 sec
D15      0.0300000 sec
D16      0.0300000 sec
D17      0.0300000 sec
D18      0.0300000 sec
D19      0.0300000 sec
D20      0.0300000 sec
D21      0.0300000 sec
D22      0.0300000 sec
D23      0.0300000 sec
D24      0.0300000 sec
D25      0.0300000 sec
D26      0.0300000 sec
D27      0.0300000 sec
D28      0.0300000 sec
D29      0.0300000 sec
D30      0.0300000 sec
D31      0.0300000 sec
D32      0.0300000 sec
D33      0.0300000 sec
D34      0.0300000 sec
D35      0.0300000 sec
D36      0.0300000 sec
D37      0.0300000 sec
D38      0.0300000 sec
D39      0.0300000 sec
D40      0.0300000 sec
D41      0.0300000 sec
D42      0.0300000 sec
D43      0.0300000 sec
D44      0.0300000 sec
D45      0.0300000 sec
D46      0.0300000 sec
D47      0.0300000 sec
D48      0.0300000 sec
D49      0.0300000 sec
D50      0.0300000 sec
D51      0.0300000 sec
D52      0.0300000 sec
D53      0.0300000 sec
D54      0.0300000 sec
D55      0.0300000 sec
D56      0.0300000 sec
D57      0.0300000 sec
D58      0.0300000 sec
D59      0.0300000 sec
D60      0.0300000 sec
D61      0.0300000 sec
D62      0.0300000 sec
D63      0.0300000 sec
D64      0.0300000 sec
D65      0.0300000 sec
D66      0.0300000 sec
D67      0.0300000 sec
D68      0.0300000 sec
D69      0.0300000 sec
D70      0.0300000 sec
D71      0.0300000 sec
D72      0.0300000 sec
D73      0.0300000 sec
D74      0.0300000 sec
D75      0.0300000 sec
D76      0.0300000 sec
D77      0.0300000 sec
D78      0.0300000 sec
D79      0.0300000 sec
D80      0.0300000 sec
D81      0.0300000 sec
D82      0.0300000 sec
D83      0.0300000 sec
D84      0.0300000 sec
D85      0.0300000 sec
D86      0.0300000 sec
D87      0.0300000 sec
D88      0.0300000 sec
D89      0.0300000 sec
D90      0.0300000 sec
D91      0.0300000 sec
D92      0.0300000 sec
D93      0.0300000 sec
D94      0.0300000 sec
D95      0.0300000 sec
D96      0.0300000 sec
D97      0.0300000 sec
D98      0.0300000 sec
D99      0.0300000 sec
D100     0.0300000 sec

===== CHANNEL f1 =====
SFO1    100.6304993 MHz
NUC1     13C
P1       9.90 usec
PLW1    53.00000000 W

===== CHANNEL f2 =====
SFO2    400.1621006 MHz
NUC2     1H
CPDPRG2  waltz16
PCPD2    90.00 usec
PLW2    13.00000000 W
PLW12   0.27963999 W
PLW13   0.27963999 W

F2 - Processing parameters
SI       32768
SF       100.6204380 MHz
WDW      EM
SSB      0
LB       1.60 Hz
GB       0
PC       1.40

```

GR 21 09

 $^{19}\text{F}$  NMR,  $\text{CDCl}_3$ , 376 MHz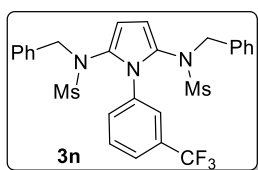

-62.07

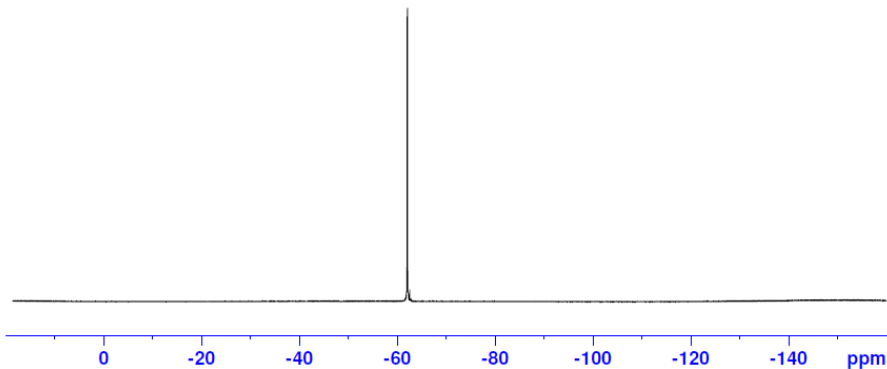

```

Current Data Parameters
NAME      GR-21-09
EXPNO    410
PROCNO   1

F2 - Acquisition Parameters
Date_    20211102
Time     12.39
INSTRUM  spect
PROBHD   5 mm PABBO BB/
PULPROG  zgfhgqn.2
TD       131072
SOLVENT  CDCl3
NS       16
DS       4
SWH      89285.711 Hz
FIDRES   0.681196 Hz
AQ       0.7340032 sec
RG       201.48
DW       5.600 usec
DE       6.50 usec
TE       300.0 K
D1       1.0000000 sec
D11      0.0300000 sec
D12      0.00002000 sec
D13      0.00002000 sec
D14      0.00002000 sec
D15      0.00002000 sec
D16      0.00002000 sec
D17      0.00002000 sec
D18      0.00002000 sec
D19      0.00002000 sec
D20      0.00002000 sec
D21      0.00002000 sec
D22      0.00002000 sec
D23      0.00002000 sec
D24      0.00002000 sec
D25      0.00002000 sec
D26      0.00002000 sec
D27      0.00002000 sec
D28      0.00002000 sec
D29      0.00002000 sec
D30      0.00002000 sec
D31      0.00002000 sec
D32      0.00002000 sec
D33      0.00002000 sec
D34      0.00002000 sec
D35      0.00002000 sec
D36      0.00002000 sec
D37      0.00002000 sec
D38      0.00002000 sec
D39      0.00002000 sec
D40      0.00002000 sec
D41      0.00002000 sec
D42      0.00002000 sec
D43      0.00002000 sec
D44      0.00002000 sec
D45      0.00002000 sec
D46      0.00002000 sec
D47      0.00002000 sec
D48      0.00002000 sec
D49      0.00002000 sec
D50      0.00002000 sec
D51      0.00002000 sec
D52      0.00002000 sec
D53      0.00002000 sec
D54      0.00002000 sec
D55      0.00002000 sec
D56      0.00002000 sec
D57      0.00002000 sec
D58      0.00002000 sec
D59      0.00002000 sec
D60      0.00002000 sec
D61      0.00002000 sec
D62      0.00002000 sec
D63      0.00002000 sec
D64      0.00002000 sec
D65      0.00002000 sec
D66      0.00002000 sec
D67      0.00002000 sec
D68      0.00002000 sec
D69      0.00002000 sec
D70      0.00002000 sec
D71      0.00002000 sec
D72      0.00002000 sec
D73      0.00002000 sec
D74      0.00002000 sec
D75      0.00002000 sec
D76      0.00002000 sec
D77      0.00002000 sec
D78      0.00002000 sec
D79      0.00002000 sec
D80      0.00002000 sec
D81      0.00002000 sec
D82      0.00002000 sec
D83      0.00002000 sec
D84      0.00002000 sec
D85      0.00002000 sec
D86      0.00002000 sec
D87      0.00002000 sec
D88      0.00002000 sec
D89      0.00002000 sec
D90      0.00002000 sec
D91      0.00002000 sec
D92      0.00002000 sec
D93      0.00002000 sec
D94      0.00002000 sec
D95      0.00002000 sec
D96      0.00002000 sec
D97      0.00002000 sec
D98      0.00002000 sec
D99      0.00002000 sec
D100     0.00002000 sec

===== CHANNEL f1 =====
SFO1    376.4894122 MHz
NUC1     19F
P1       15.00 usec
PLW1    21.00000000 W

===== CHANNEL f2 =====
SFO2    400.1621006 MHz
NUC2     1H
CPDPRG2  waltz16
PCPD2    90.00 usec
PLW2    13.00000000 W
PLW12   0.27963999 W

F2 - Processing parameters
SI       65536
SF       376.5270650 MHz
WDW      EM
SSB      0
LB       0.30 Hz
GB       0
PC       1.00

```

|               |                |             |             |                 |              |                        |                        |
|---------------|----------------|-------------|-------------|-----------------|--------------|------------------------|------------------------|
| Sample Name   | HRMS21127DEC20 | Position    | Vial 20     | Instrument Name | Instrument 1 | User Name              |                        |
| Inj Vol       | 1              | InjPosition |             | SampleType      | Sample       | IRM Calibration Status | Some Ions Missed       |
| Data Filename | SH-20-319.d    | ACQ Method  | ISOCRATIC.m | Comment         |              | Acquired Time          | 12/28/2021 12:40:54 PM |

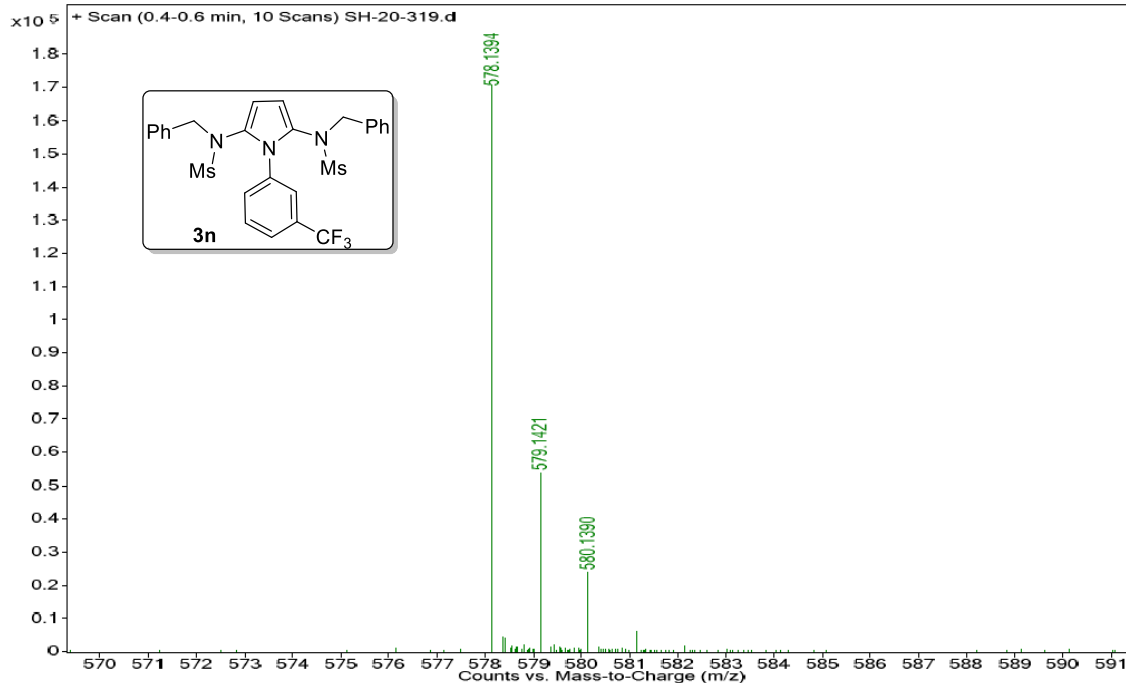

GR-21-62A

<sup>1</sup>H NMR, CDCl<sub>3</sub>, 400 MHz

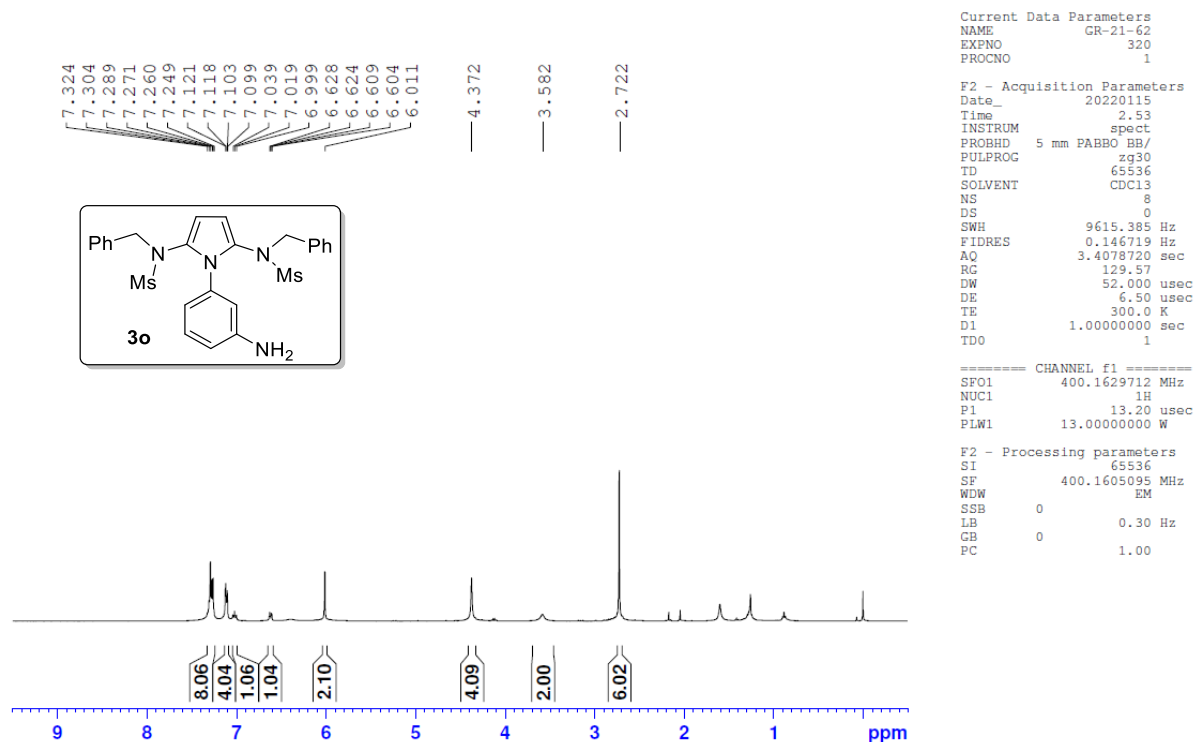

GR-21-62

<sup>13</sup>C NMR, CDCl<sub>3</sub>, 125 MHz

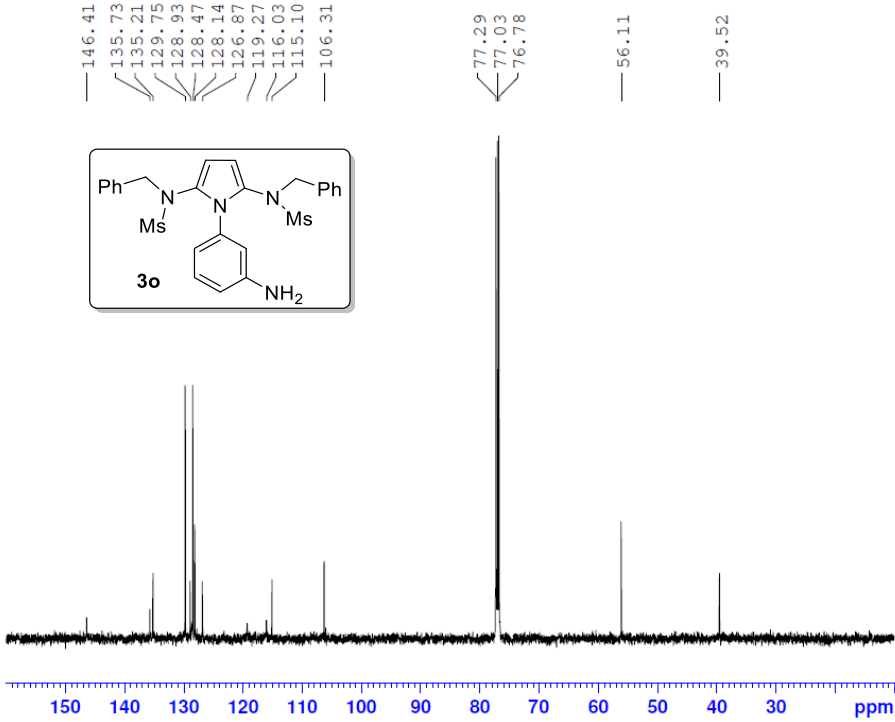

```

Current Data Parameters
NAME          GR-21-62
EXPNO         370
PROCNO        1

F2 - Acquisition Parameters
Date_         20211203
Time_         8.47
INSTRUM       spect
PROBHDD       5 mm PATXI 1H/
PULPROG       zgpg30
TD            65536
SOLVENT       CDCl3
NS            2048
DS            4
SWH           29761.904 Hz
FIDRES        0.454131 Hz
AQ            1.1010048 sec
RG            56.22
DW            16.800 usec
DE            6.50 usec
TE            303.0 K
D1            2.00000000 sec
D11           0.03000000 sec
TD0           1

===== CHANNEL f1 =====
SFO1          125.9077573 MHz
NUC1          13C
P1            9.23 usec
PLW1          244.00000000 W

===== CHANNEL f2 =====
SFO2          500.6783527 MHz
NUC2          1H
CPDPRG2       waltz16
PCPD2         80.00 usec
PLW2          13.60000038 W
PLW12         0.08840500 W
PLW13         0.05657900 W

F2 - Processing parameters
SI            32768
SF            125.8951680 MHz
WDW           EM
SSB           0
LB            2.00 Hz
GB            0
PC            1.40
    
```

| Sample Name   | HRMS22I14JAN24 | Position    | Vial 24     | Instrument Name | Instrument 1 | User Name              |                       |
|---------------|----------------|-------------|-------------|-----------------|--------------|------------------------|-----------------------|
| Inj Vol       | 1              | InjPosition |             | SampleType      | Sample       | IRM Calibration Status | Some Ions Missed      |
| Data Filename | NG-18-12.d     | ACQ Method  | ISOCRATIC.m | Comment         |              | Acquired Time          | 1/14/2022 12:54:26 PM |

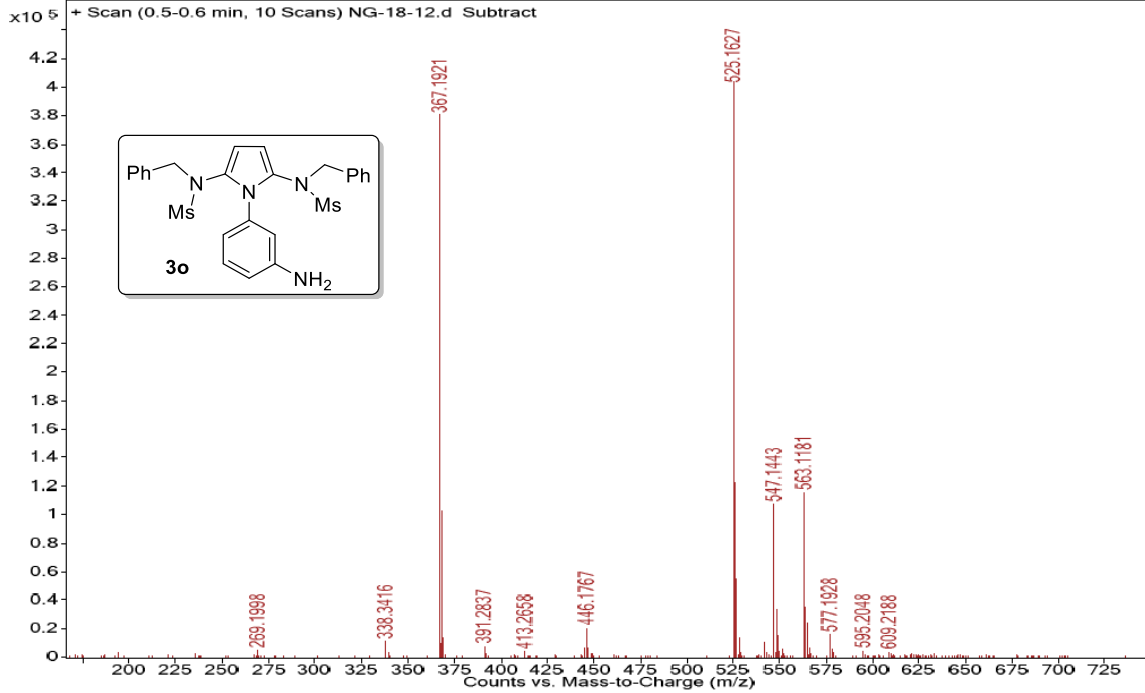

<sup>1</sup>H NMR, CDCl<sub>3</sub>, 400 MHz

GR-21-69

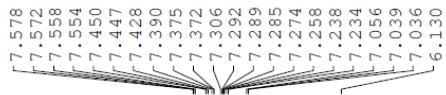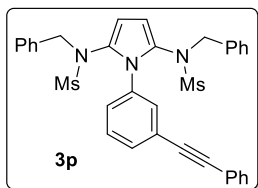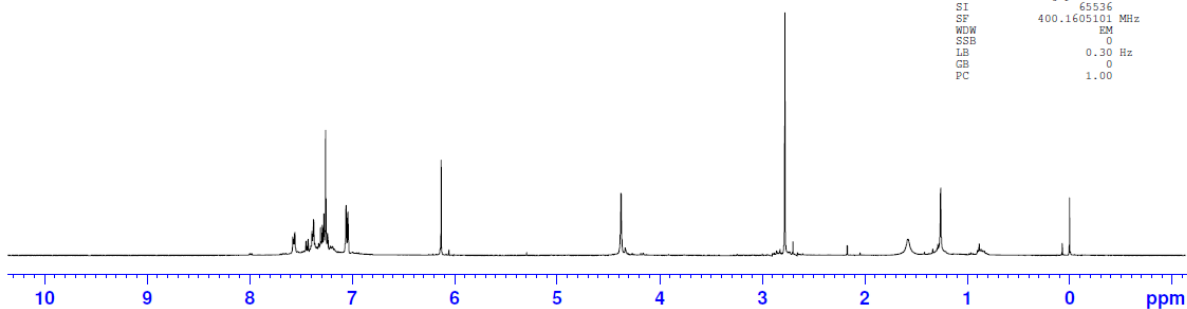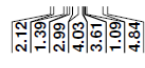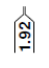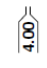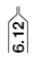

Current Data Parameters  
NAME Desktop  
EXPNO 540  
PROCNO 1

F2 - Acquisition Parameters  
Date\_ 20211217  
Time 11.13  
INSTRUM spect  
PROBHD 5 mm PABBO BB/  
PULPROG zg30  
TD 65536  
SOLVENT CDCl3  
NS 8  
DS 0  
SWH 9615.385 Hz  
FIDRES 0.146719 Hz  
AQ 3.4078720 sec  
RG 145.29  
DW 52.000 usec  
DE 6.50 usec  
TE 300.0 K  
D1 1.00000000 sec  
TDO 1

CHANNEL f1  
SF01 400.1629712 MHz  
NUC1 1H  
P1 13.20 usec  
PLW1 13.00000000 W

F2 - Processing parameters  
SI 65536  
SF 400.1605101 MHz  
WDW EM  
SSB 0  
LB 0.30 Hz  
GB 0  
PC 1.00

<sup>13</sup>C NMR, CDCl<sub>3</sub>, 125 MHz

SH 21 57

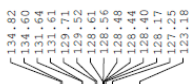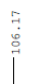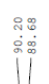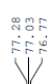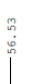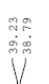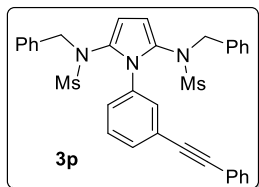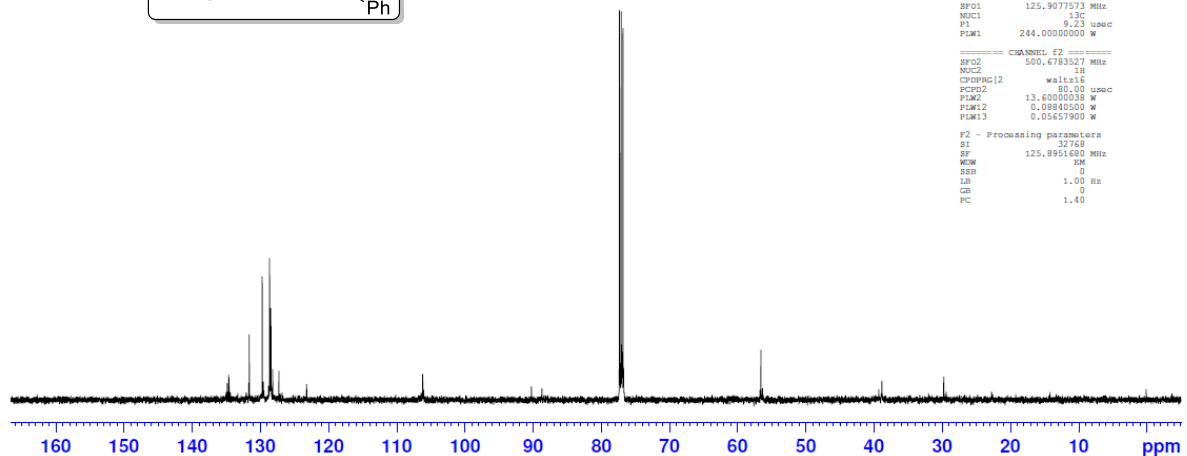

Current Data Parameters  
NAME 13c  
EXPNO 310  
PROCNO 1

F2 - Acquisition Parameters  
Date\_ 20220418  
Time 10.24  
INSTRUM spect  
PROBHD 5 mm PAXI 1H/  
PULPROG zgpg30  
TD 65536  
SOLVENT CDCl3  
NS 2048  
DS 4  
SWH 29761.904 Hz  
FIDRES 0.454131 Hz  
AQ 1.1010048 sec  
RG 35.22  
DW 16.800 usec  
DE 6.50 usec  
TE 300.0 K  
D1 1.00000000 sec  
D11 0.03000000 sec  
TDO 1

CHANNEL f1  
SF01 125.9077573 MHz  
NUC1 13C  
P1 9.23 usec  
PLW1 244.00000000 W

CHANNEL f2  
SF02 500.6783527 MHz  
NUC2 1H  
CPDPRG2 waltz16  
PULPROG2 zgpg30  
PLW2 13.60000038 W  
PLW12 0.08840500 W  
PLW13 0.03657800 W

F2 - Processing parameters  
SI 32768  
SF 125.8951680 MHz  
WDW EM  
SSB 0  
LB 1.00 Hz  
GB 0  
PC 1.40

|               |                |             |             |                 |              |                        |                       |
|---------------|----------------|-------------|-------------|-----------------|--------------|------------------------|-----------------------|
| Sample Name   | HRMS22124JAN17 | Position    | Vial 17     | Instrument Name | Instrument 1 | User Name              |                       |
| Inj Vol       | 1              | InjPosition |             | SampleType      | Sample       | IRM Calibration Status | Some Ions Missed      |
| Data Filename | SH-20-13.d     | ACQ Method  | ISOCRATIC.m | Comment         |              | Acquired Time          | 1/24/2022 12:37:29 PM |

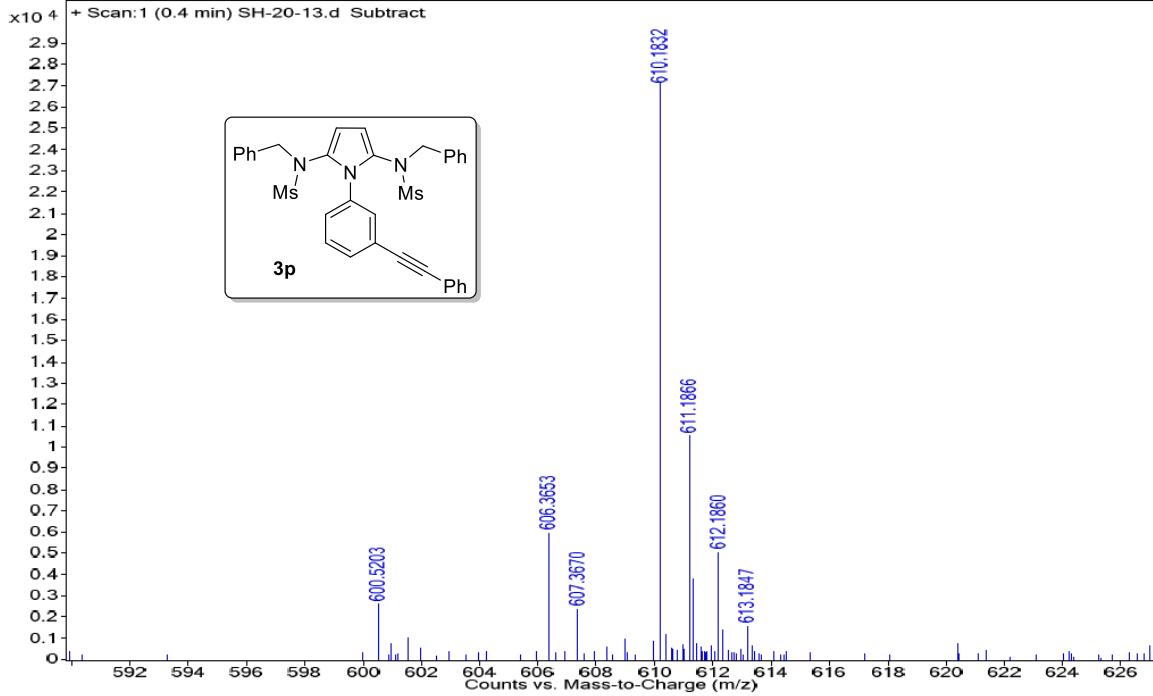

GR-21-15

<sup>1</sup>H NMR, CDCl<sub>3</sub>, 500 MHz

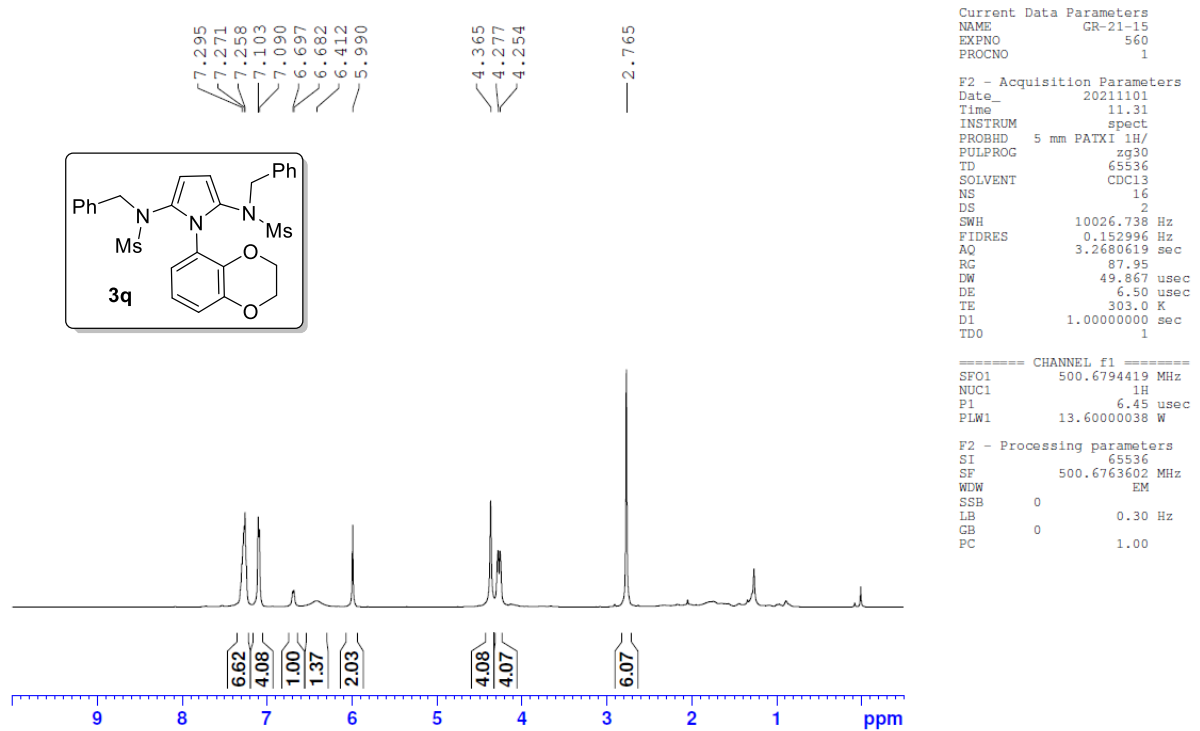

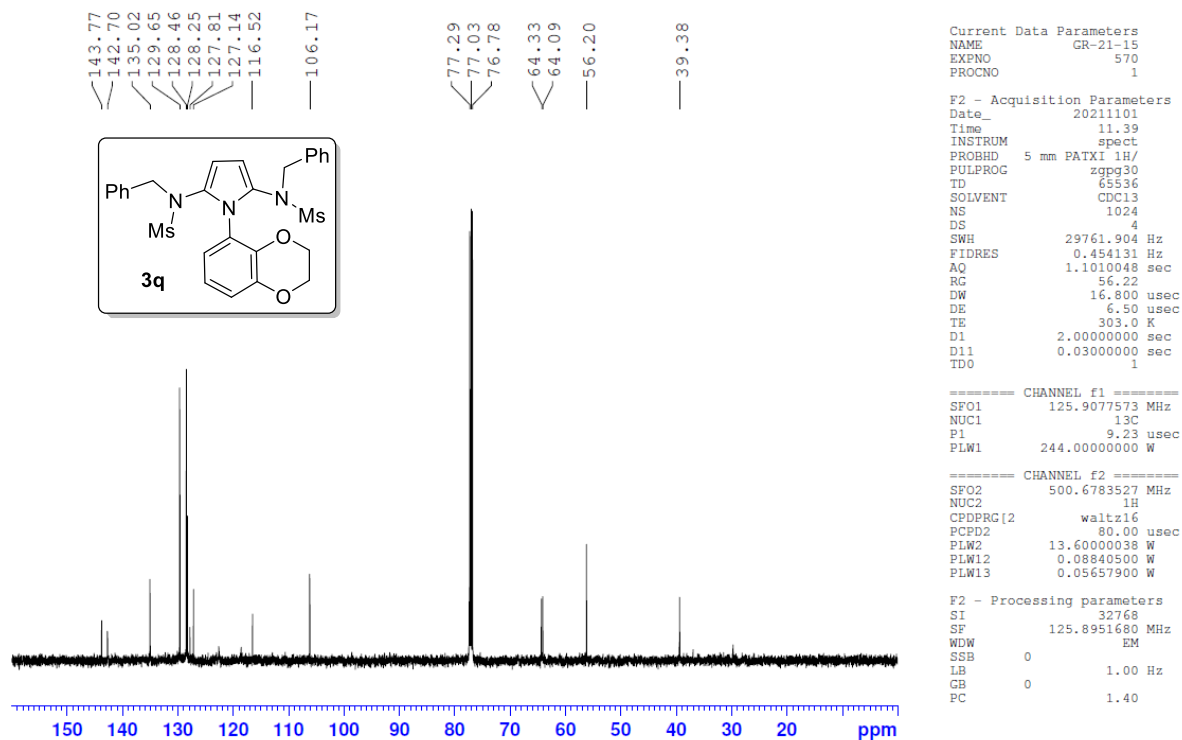

| Sample Name   | HRMS22107JAN20 | Position    | Vial 20     | Instrument Name | Instrument 1 | User Name              |
|---------------|----------------|-------------|-------------|-----------------|--------------|------------------------|
| Inj Vol       | 1              | InjPosition |             | SampleType      | Sample       | IRM Calibration Status |
| Data Filename | NG-19-01.d     | ACQ Method  | ISOCRATIC.m | Comment         |              | Acquired Time          |

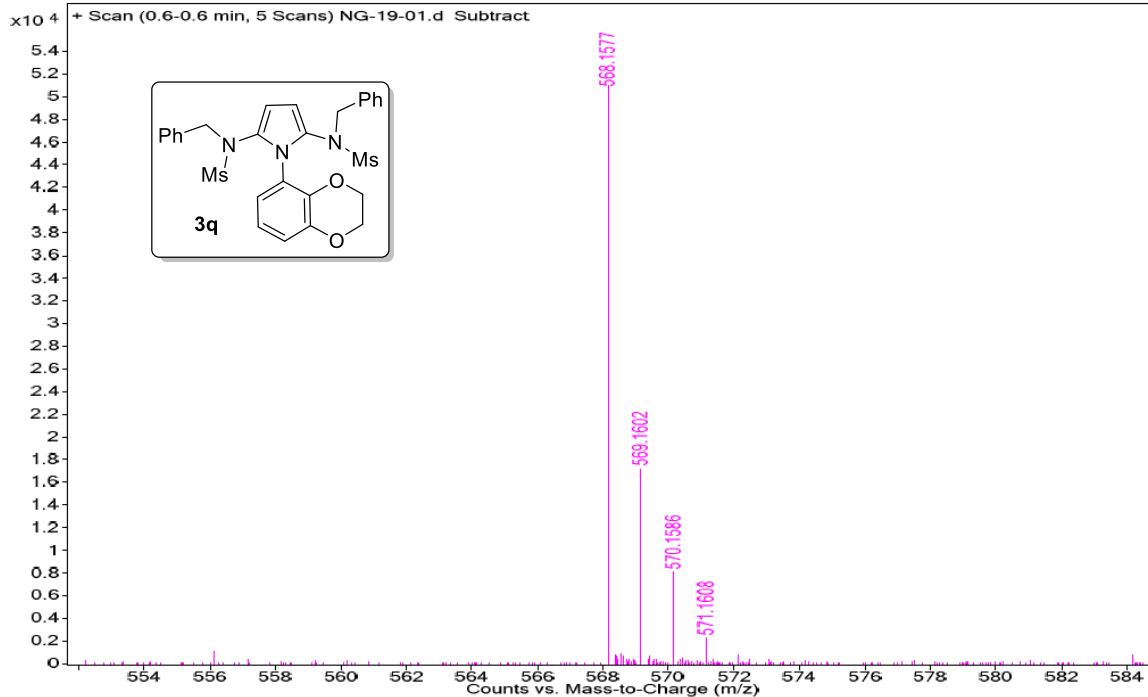



GR-21-39

 $^1\text{H}$  NMR,  $\text{CDCl}_3$ , 400 MHz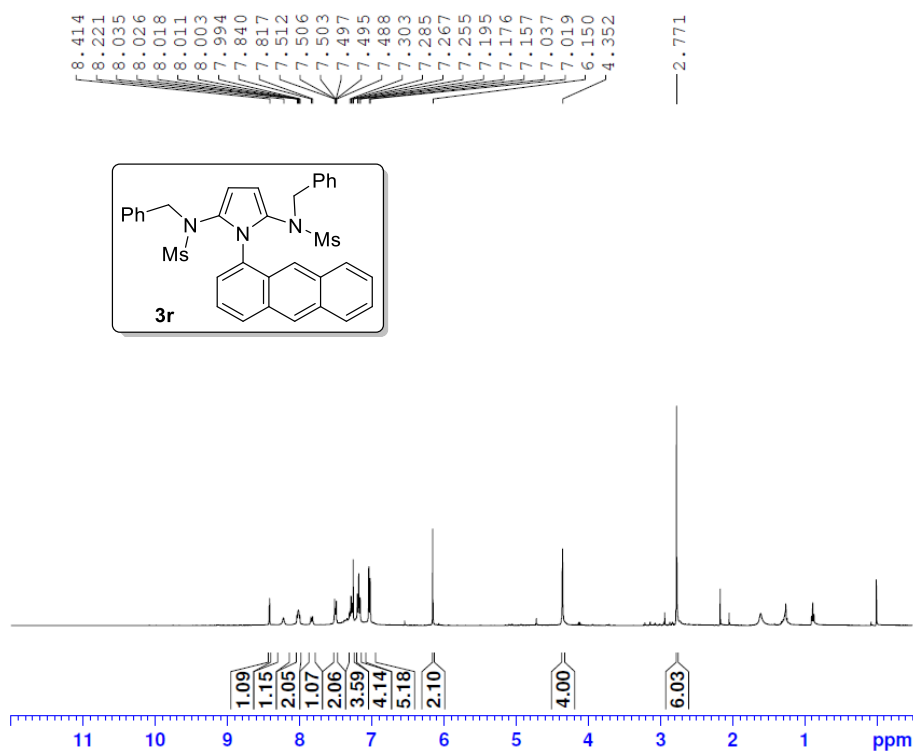

Current Data Parameters  
 NAME GR-21-39  
 EXPNO 440  
 PROCNO 1

F2 - Acquisition Parameters  
 Date\_ 20211119  
 Time 17.03  
 INSTRUM spect  
 PROBHD 5 mm PABBO BB/  
 PULPROG zg30  
 TD 65536  
 SOLVENT  $\text{CDCl}_3$   
 NS 8  
 DS 0  
 SWH 9615.385 Hz  
 FIDRES 0.146719 Hz  
 AQ 3.4078720 sec  
 RG 114.26  
 DW 52.000 usec  
 DE 6.50 usec  
 TE 300.0 K  
 D1 1.00000000 sec  
 TDO 1

===== CHANNEL f1 =====  
 SFO1 400.1629712 MHz  
 NUC1  $^1\text{H}$   
 P1 13.20 usec  
 PLW1 13.00000000 W

F2 - Processing parameters  
 SI 65536  
 SF 400.1605115 MHz  
 WDW EM  
 SSB 0  
 LB 0.30 Hz  
 GB 0  
 PC 1.00

GR-21-39

 $^{13}\text{C}$  NMR,  $\text{CDCl}_3$ , 101 MHz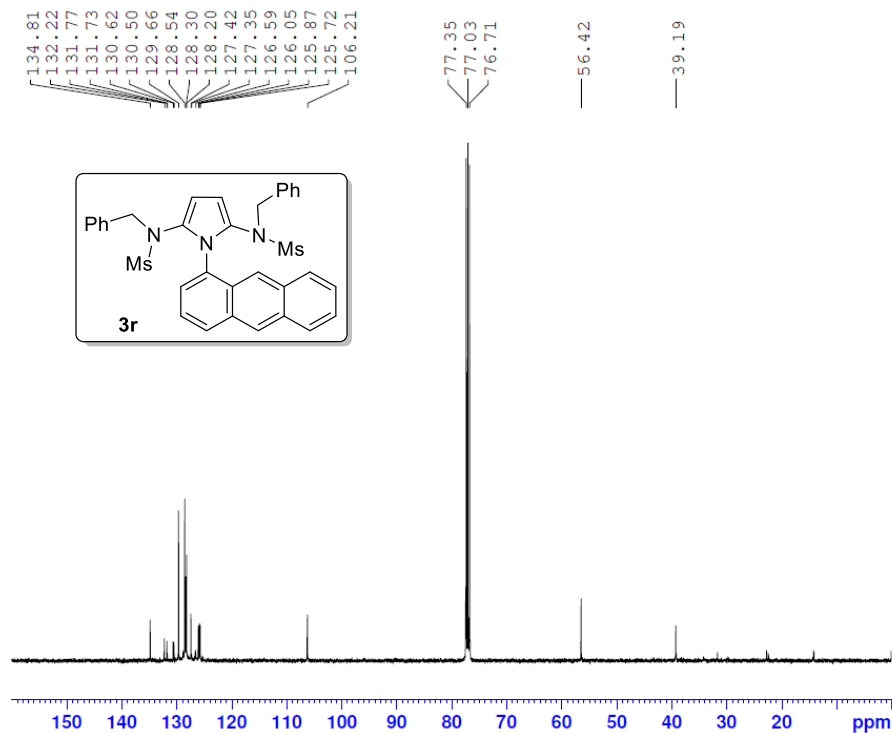

Current Data Parameters  
 NAME Desktop  
 EXPNO 450  
 PROCNO 1

F2 - Acquisition Parameters  
 Date\_ 20211119  
 Time 19.00  
 INSTRUM spect  
 PROBHD 5 mm PABBO BB/  
 PULPROG zgpg30  
 TD 65536  
 SOLVENT  $\text{CDCl}_3$   
 NS 2048  
 DS 4  
 SWH 24038.461 Hz  
 FIDRES 0.366798 Hz  
 AQ 1.3631488 sec  
 RG 201.48  
 DW 20.800 usec  
 DE 6.50 usec  
 TE 300.0 K  
 D1 2.00000000 sec  
 D11 0.03000000 sec  
 TDO 1

===== CHANNEL f1 =====  
 SFO1 100.6304993 MHz  
 NUC1  $^{13}\text{C}$   
 P1 9.90 usec  
 PLW1 53.00000000 W

===== CHANNEL f2 =====  
 SFO2 400.1621006 MHz  
 NUC2  $^1\text{H}$   
 CPDPRG2 waltz16  
 P1 90.00 usec  
 PLW2 13.00000000 W  
 PLW12 0.27963999 W  
 PLW13 0.22651000 W

F2 - Processing parameters  
 SI 32768  
 SF 100.6204360 MHz  
 WDW EM  
 SSB 0  
 LB 1.00 Hz  
 GB 0  
 PC 1.40

Sample Name HRMS22I24JAN16 Position Vial 16 Instrument Name Instrument 1 User Name  
 Inj Vol 1 InjPosition Sample IRM Calibration Status Some Ions Missed  
 Data Filename SH-20-09.d ACQ Method ISOCRATIC.m Comment Acquired Time 1/24/2022 12:34:23 PM

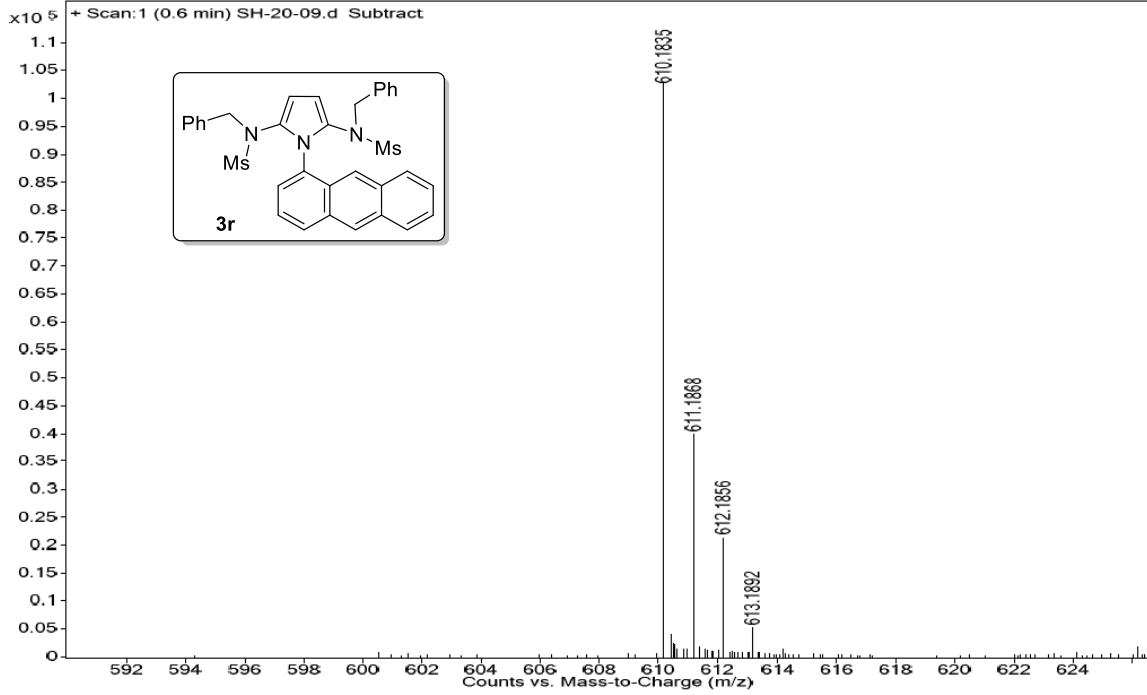

<sup>1</sup>H NMR, CDCl<sub>3</sub>, 500 MHz

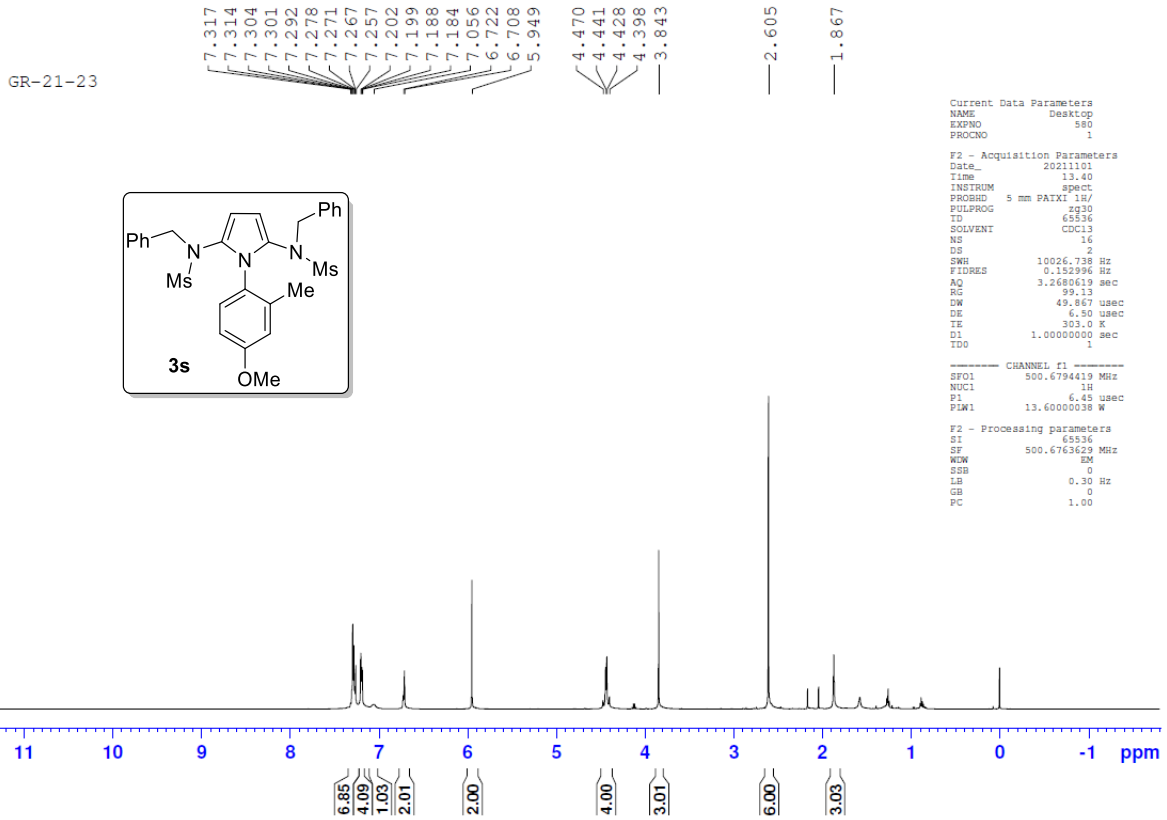

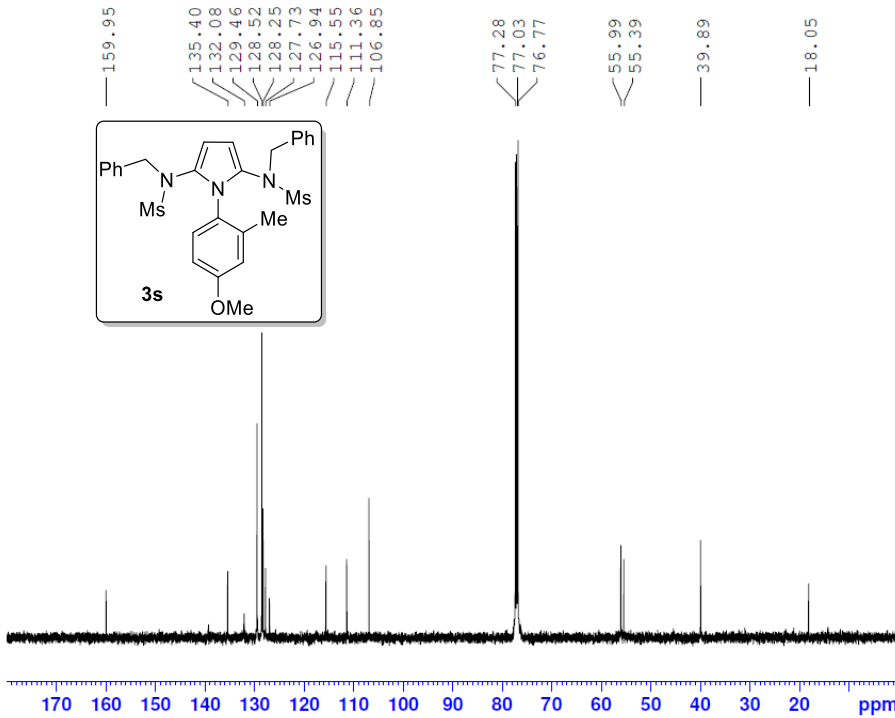

| Sample Name   | HRMS211I21DEC16 | Position    | Vial 16     | Instrument Name | Instrument 1 | User Name              |                        |
|---------------|-----------------|-------------|-------------|-----------------|--------------|------------------------|------------------------|
| Inj Vol       | 1               | InjPosition |             | SampleType      | Sample       | IRM Calibration Status | Some Ions Missed       |
| Data Filename | SH-20-334.d     | ACQ Method  | ISOCRATIC.m | Comment         |              | Acquired Time          | 12/21/2021 12:23:23 PM |

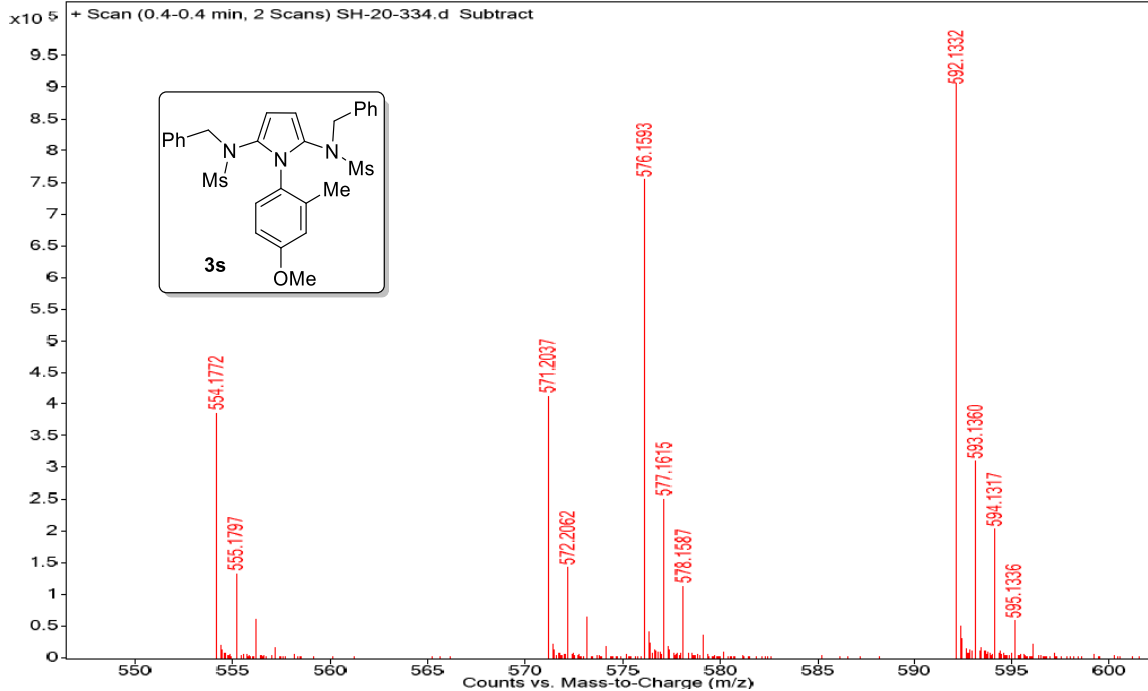

GR-21-22

 $^1\text{H}$  NMR,  $\text{CDCl}_3$ , 400 MHz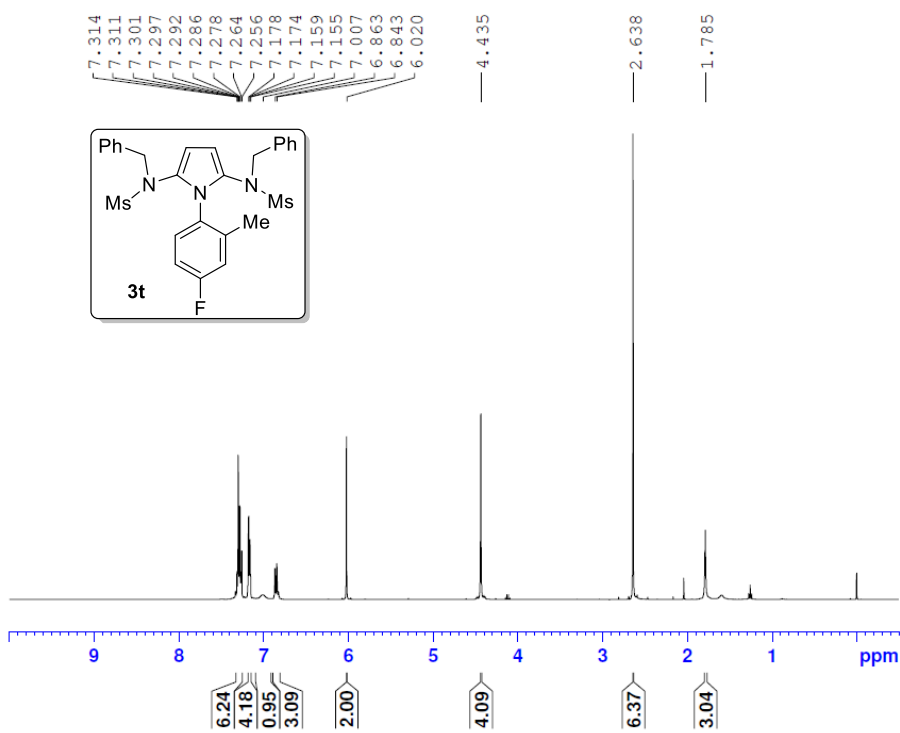

Current Data Parameters  
 NAME GR-21-22  
 EXPNO 370  
 PROCNO 1

F2 - Acquisition Parameters  
 Date\_ 20211101  
 Time 17.09  
 INSTRUM spect  
 PROBHD 5 mm PABBO BB/  
 PULPROG zg30  
 TD 6536  
 SOLVENT  $\text{CDCl}_3$   
 NS 8  
 DS 0  
 SWH 9615.385 Hz  
 FIDRES 0.146719 Hz  
 AQ 3.4078720 sec  
 RG 80.54  
 DW 52.000 usec  
 DE 6.50 usec  
 TE 300.0 K  
 D1 1.00000000 sec  
 TDO 1

==== CHANNEL f1 =====  
 SFO1 400.1629712 MHz  
 NUC1  $^1\text{H}$   
 P1 13.20 usec  
 PLW1 13.00000000 W

F2 - Processing parameters  
 SI 65536  
 SF 400.1605113 MHz  
 WDW EM  
 SSB 0  
 LB 0.30 Hz  
 CB 0  
 PC 1.00

 $^{13}\text{C}$  NMR,  $\text{CDCl}_3$ , 101 MHz

GR-21-22

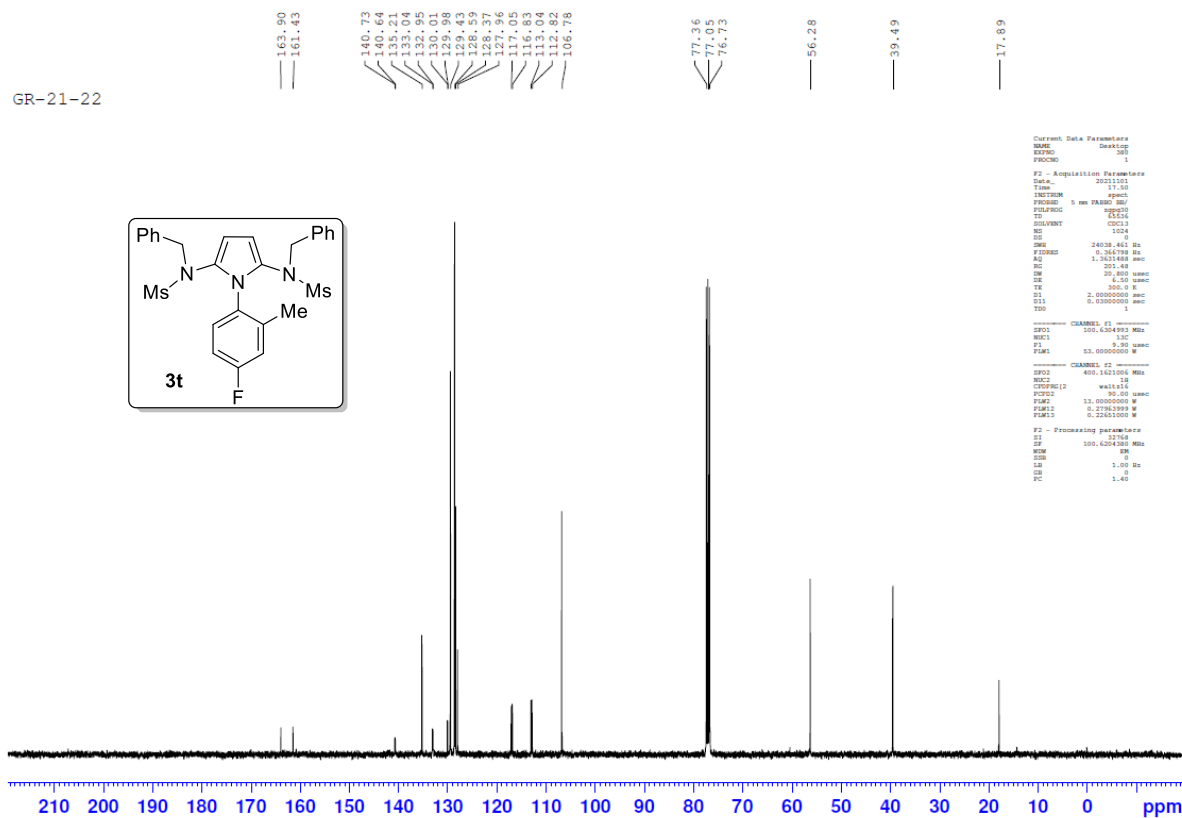

Current Data Parameters  
 NAME GR-21-22  
 EXPNO 370  
 PROCNO 1

F2 - Acquisition Parameters  
 Date\_ 20211101  
 Time 17.10  
 INSTRUM spect  
 PROBHD 5 mm PABBO BB/  
 PULPROG zgpg30  
 TD 6536  
 SOLVENT  $\text{CDCl}_3$   
 NS 1024  
 DS 24038.461 Hz  
 SWH 9615.385 Hz  
 FIDRES 0.146719 Hz  
 AQ 3.4078720 sec  
 RG 80.54  
 DW 52.000 usec  
 DE 6.50 usec  
 TE 300.0 K  
 D1 1.00000000 sec  
 TDO 0.03000000 sec

==== CHANNEL f1 =====  
 SFO1 100.626095 MHz  
 NUC1  $^{13}\text{C}$   
 P1 9.00 usec  
 PLW1 51.00000000 W

==== CHANNEL f2 =====  
 SFO2 400.1629712 MHz  
 NUC2  $^1\text{H}$   
 P2 13.20 usec  
 PLW2 13.00000000 W

F2 - Processing parameters  
 SI 32768  
 SF 100.626095 MHz  
 WDW EM  
 SSB 0  
 LB 1.00 Hz  
 CB 0  
 PC 1.40

GR-21-22

<sup>19</sup>F NMR, CDCl<sub>3</sub>, 376 MHz

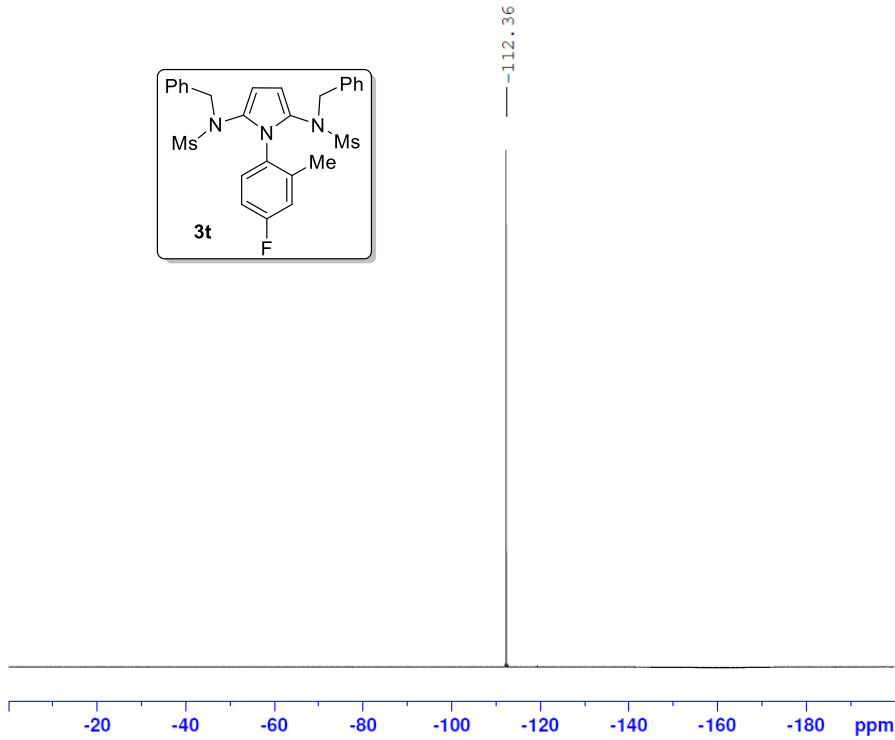

```
Current Data Parameters
NAME GR-21-22
EXPNO 390
PROCNO 1

F2 - Acquisition Parameters
Date_ 20211101
Time 17.52
INSTRUM spect
PROBHD 5 mm PABBO BB/
PULPROG zgfhigqn.2
TD 131072
SOLVENT CDCl3
NS 16
DS 4
SWH 89285.711 Hz
FIDRES 0.681196 Hz
AQ 0.7340032 sec
RG 201.48
DW 5.600 usec
DE 6.50 usec
TE 300.0 K
D1 1.00000000 sec
D11 0.03000000 sec
D12 0.00002000 sec
TDO 1

===== CHANNEL f1 =====
SF01 376.4894122 MHz
NUC1 19F
P1 15.00 usec
PLW1 21.00000000 W

===== CHANNEL f2 =====
SF02 400.1621006 MHz
NUC2 1H
CPDPRG2 waltz16
PCPD2 90.00 usec
PLW2 13.00000000 W
PLW12 0.27963999 W

F2 - Processing parameters
SI 65536
SF 376.5270650 MHz
WDW EM
SSB 0
LB 0.30 Hz
GB 0
PC 1.00
```

| Sample Name   | HRMS22119JAN21 | Position    | Vial 21     | Instrument Name | Instrument 1 | User Name              |                       |
|---------------|----------------|-------------|-------------|-----------------|--------------|------------------------|-----------------------|
| Inj Vol       | 1              | InjPosition |             | SampleType      | Sample       | IRM Calibration Status | Some Ions Missed      |
| Data Filename | SH-20-61.d     | ACQ Method  | ISOCRATIC.m | Comment         |              | Acquired Time          | 1/19/2022 12:34:50 PM |

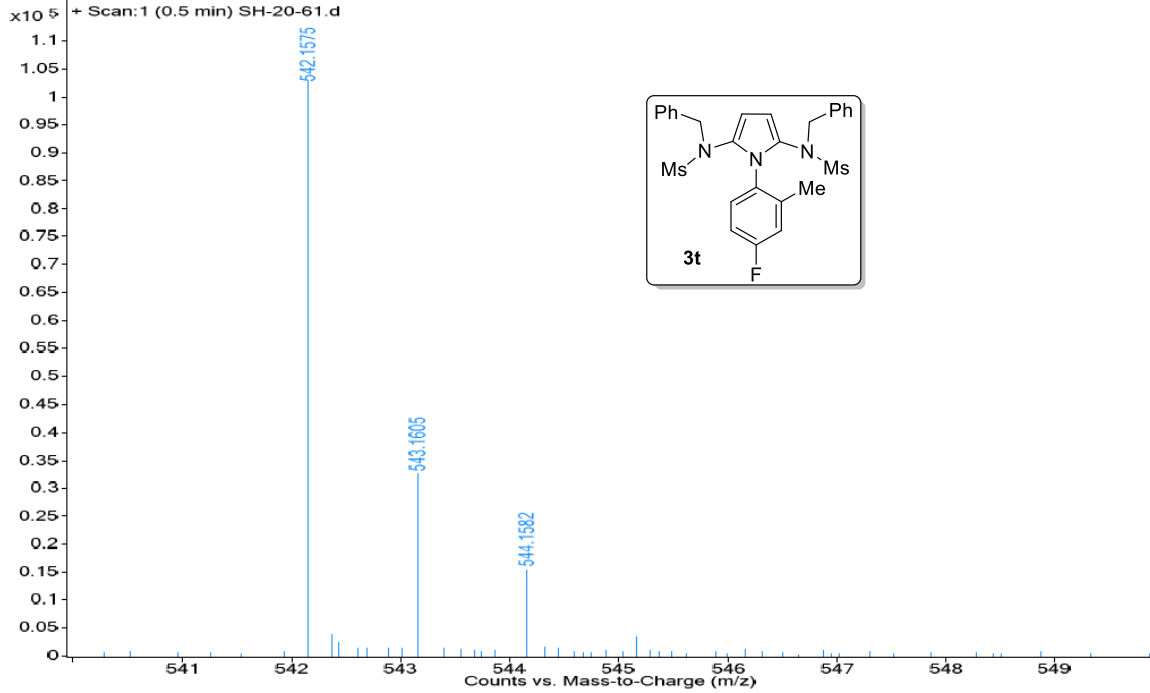

GR-21-12

 $^1\text{H}$  NMR,  $\text{CDCl}_3$ , 500 MHz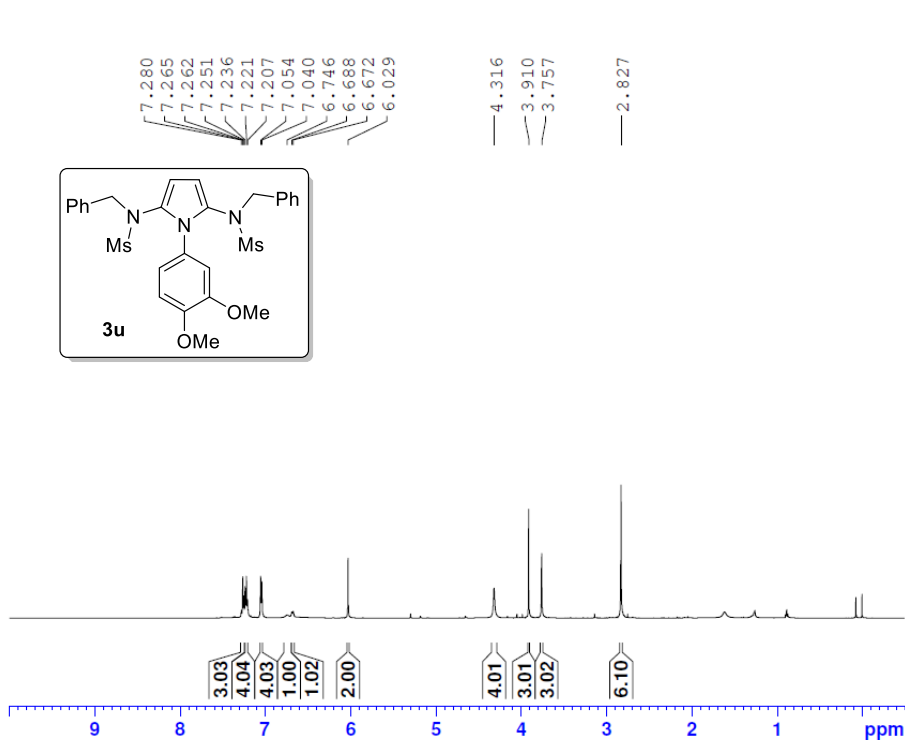

```

Current Data Parameters
NAME          GR-21-12
EXPNO        320
PROCNO       1

F2 - Acquisition Parameters
Date_        20211214
Time         7.04
INSTRUM     spect
PROBHD      5 mm PATXI 1H/
PULPROG     zg30
TD          65536
SOLVENT     CDCl3
NS          16
DS          2
SWH         10026.738 Hz
FIDRES     0.152996 Hz
AQ         3.2680619 sec
RG         99.13
DW         49.867 usec
DE         6.50 usec
TE         300.0 K
D1         1.0000000 sec
TD0        1

===== CHANNEL f1 =====
SFO1      500.6794419 MHz
NUC1       1H
P1         6.45 usec
PLW1      13.60000038 W

F2 - Processing parameters
SI         65536
SF         500.6763606 MHz
WDW        EM
SSB        0
LB         0.30 Hz
GB         0
PC         1.00

```

GR-21-12

 $^{13}\text{C}$  NMR,  $\text{CDCl}_3$ , 125 MHz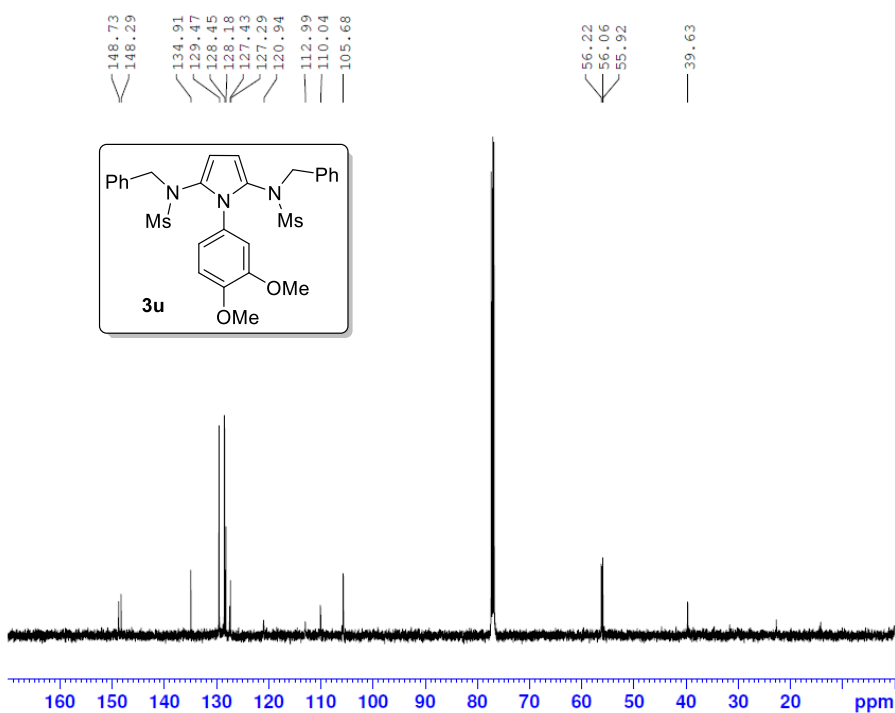

```

Current Data Parameters
NAME          GR-21-12
EXPNO        330
PROCNO       1

F2 - Acquisition Parameters
Date_        20211214
Time         7.23
INSTRUM     spect
PROBHD      5 mm PATXI 1H/
PULPROG     zgpg30
TD          65536
SOLVENT     CDCl3
NS          2048
DS          4
SWH         29761.904 Hz
FIDRES     0.454131 Hz
AQ         1.1010048 sec
RG         107.78
DW         16.800 usec
DE         6.50 usec
TE         300.0 K
D1         2.0000000 sec
D11        0.03000000 sec
TD0        1

===== CHANNEL f1 =====
SFO1      125.9077573 MHz
NUC1       13C
P1         9.23 usec
PLW1      244.0000000 W

===== CHANNEL f2 =====
SFO2      500.6783527 MHz
NUC2       1H
CPDPRG[2]  waltz16
PCPD2     80.00 usec
PLW2      13.60000038 W
PLW12     0.08840500 W
PLW13     0.05657900 W

F2 - Processing parameters
SI         32768
SF         125.8951680 MHz
WDW        EM
SSB        0
LB         1.00 Hz
GB         0
PC         1.40

```

|               |                |             |             |                 |              |                        |                       |
|---------------|----------------|-------------|-------------|-----------------|--------------|------------------------|-----------------------|
| Sample Name   | HRMS22I18JAN23 | Position    | Vial 23     | Instrument Name | Instrument 1 | User Name              |                       |
| Inj Vol       | 1              | InjPosition |             | SampleType      | Sample       | IRM Calibration Status | Some Ions Missed      |
| Data Filename | SH-20-09.d     | ACQ Method  | ISOCRATIC.m | Comment         |              | Acquired Time          | 1/18/2022 12:50:19 PM |

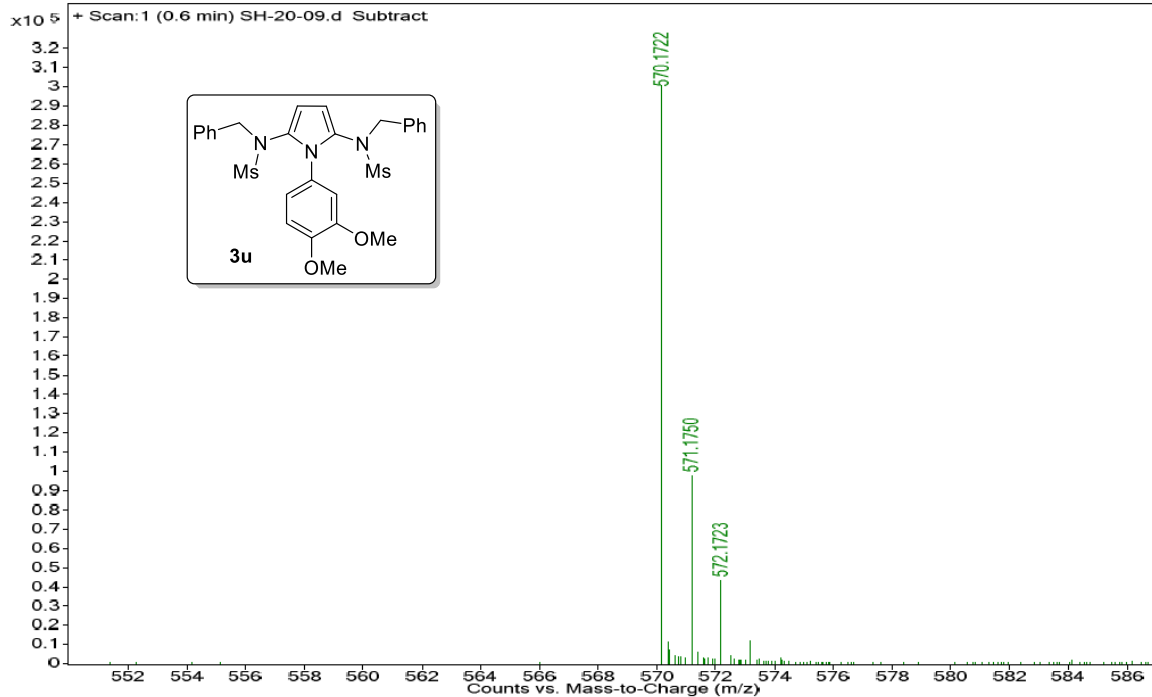

GR-21-06

<sup>1</sup>H NMR, CDCl<sub>3</sub>, 400 MHz

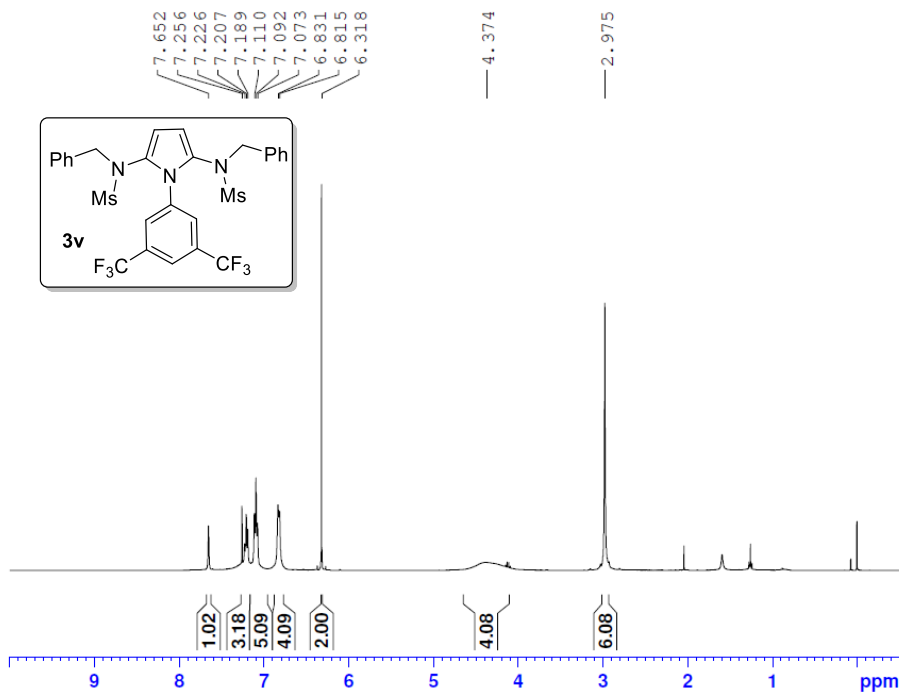

Current Data Parameters  
 NAME GR-21-06  
 EXPNO 580  
 PROCNO 1

F2 - Acquisition Parameters  
 Date\_ 20211024  
 Time 5.24  
 INSTRUM spect  
 PROBHD 5 mm PABBO BB/  
 PULPROG zg30  
 TD 65536  
 SOLVENT CDCl3  
 NS 8  
 DS 0  
 SWH 9615.385 Hz  
 FIDRES 0.146719 Hz  
 AQ 3.4078720 sec  
 RG 80.54  
 DW 52.000 usec  
 DE 6.50 usec  
 TE 300.0 K  
 D1 1.00000000 sec  
 TDO 1

===== CHANNEL f1 =====  
 SFO1 400.1629712 MHz  
 NUC1 1H  
 P1 13.20 usec  
 PLW1 13.00000000 W

F2 - Processing parameters  
 SI 65536  
 SF 400.1605110 MHz  
 WDW EM  
 SSB 0  
 LB 0.30 Hz  
 GB 0  
 PC 1.00

GR 21 06

<sup>13</sup>C NMR, CDCl<sub>3</sub>, 125 MHz

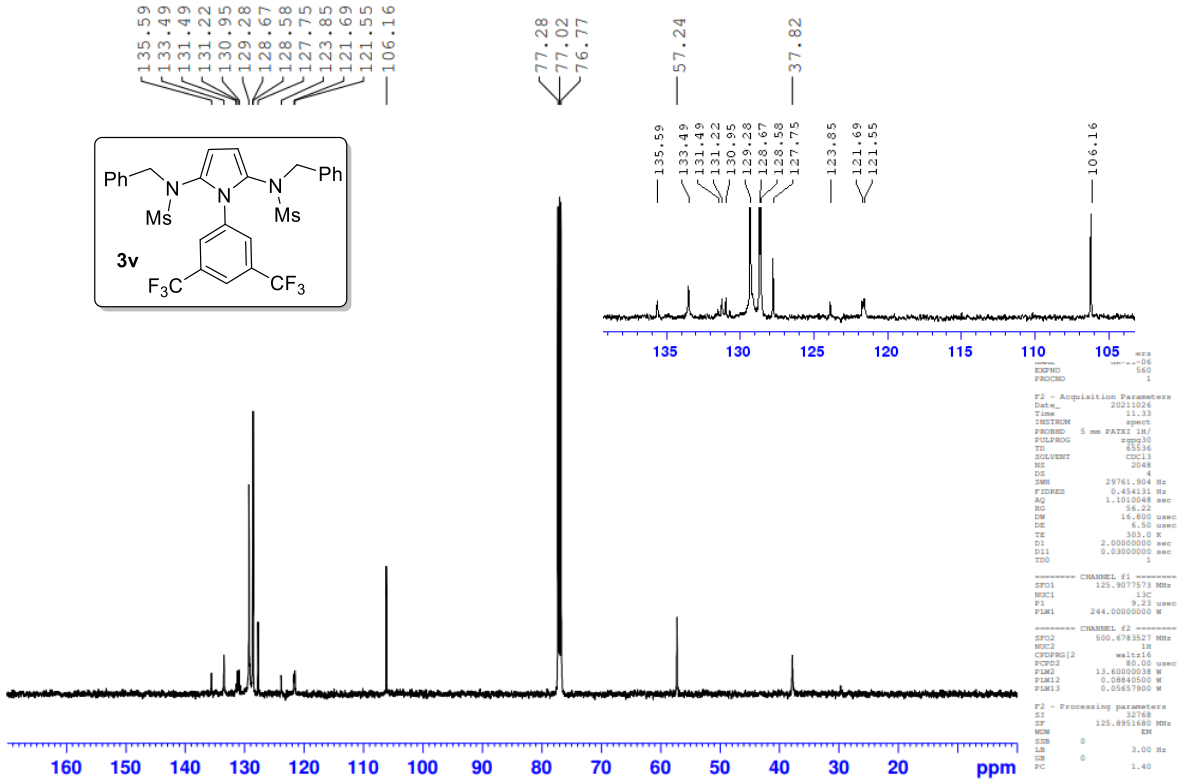

GR-21-06

<sup>19</sup>F NMR, CDCl<sub>3</sub>, 376 MHz

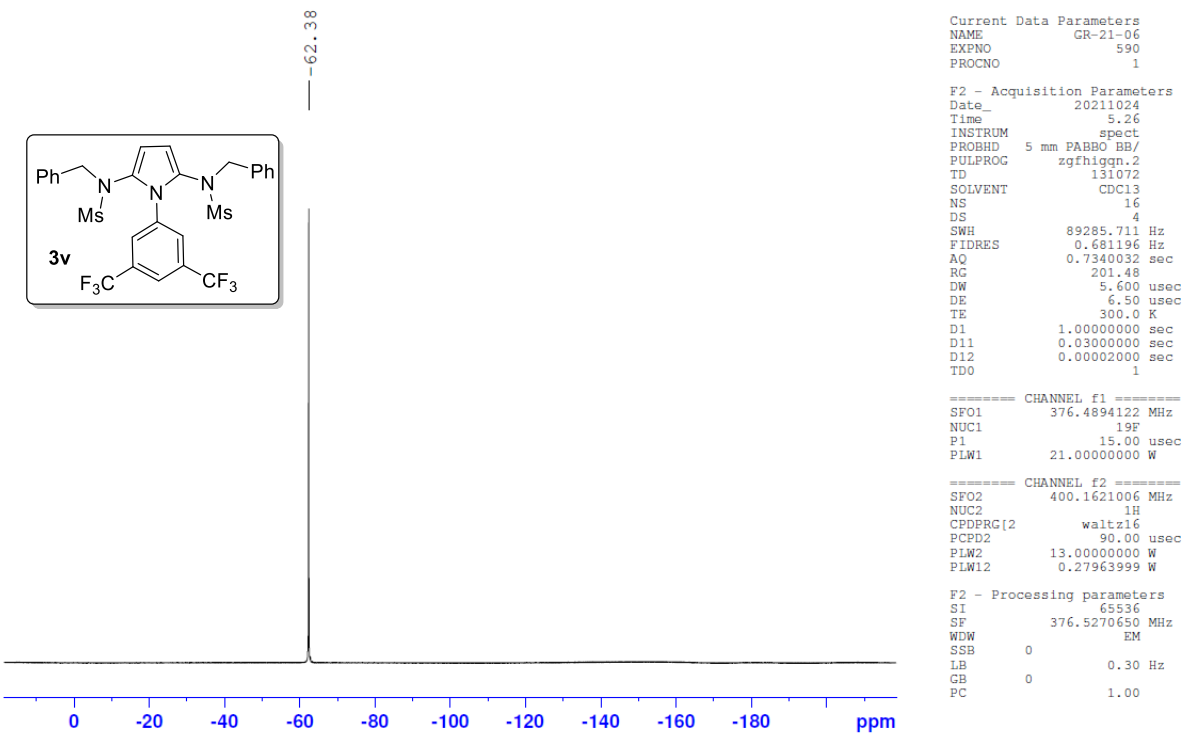



Sample Name HRMS21I21DEC15 Position Vial 15 Instrument Name Instrument 1 User Name  
 Inj Vol 1 InjPosition Instrument 1 Sample IRM Calibration Status Some Ions Missed  
 Data Filename SH-20-319.d ACQ Method ISOCRATIC.m Comment Acquired Time 12/21/2021 12:19:49 PM

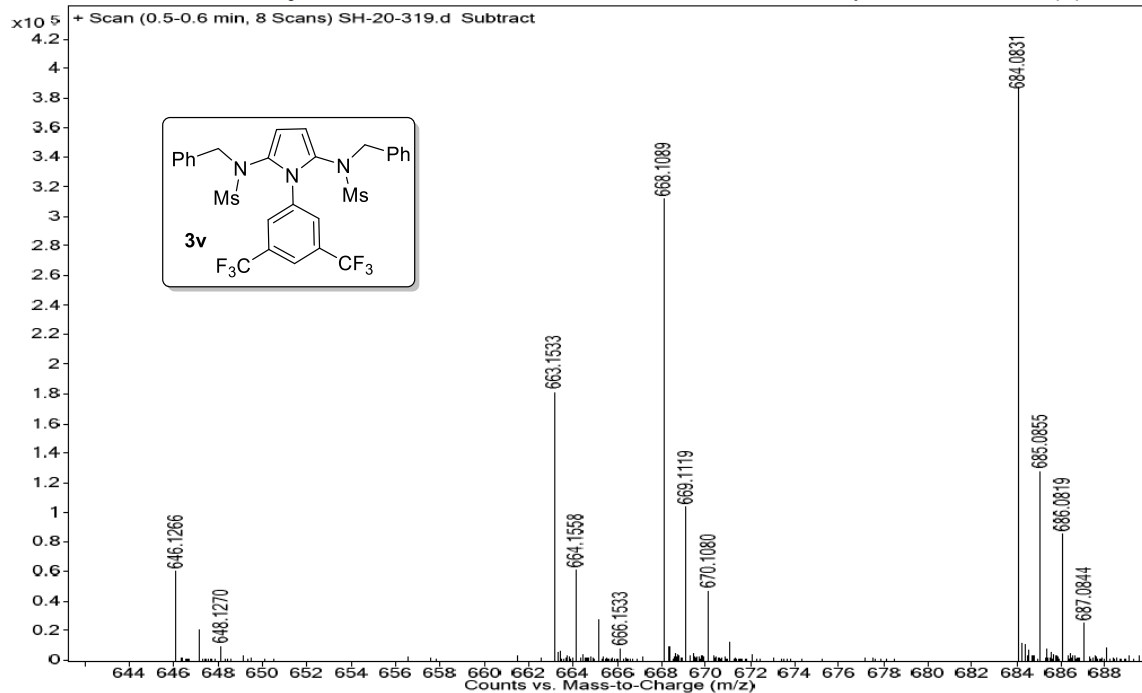

GR-21-26

<sup>1</sup>H NMR, CDCl<sub>3</sub>, 400 MHz

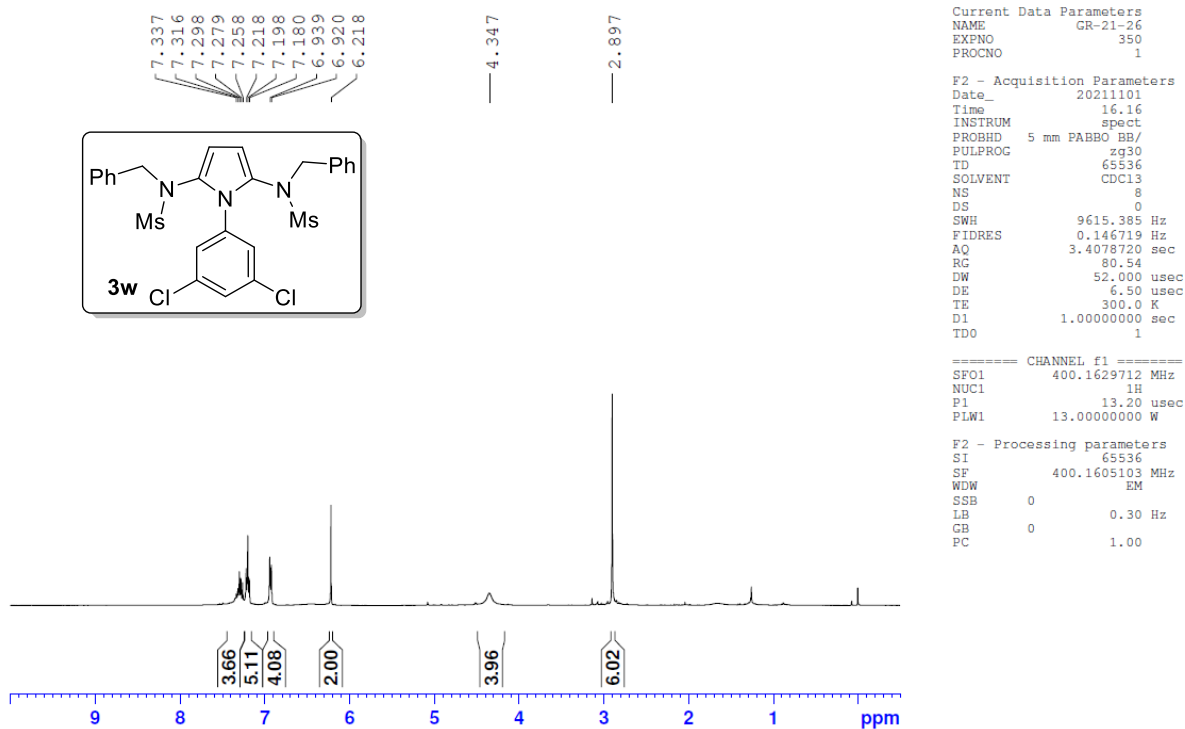

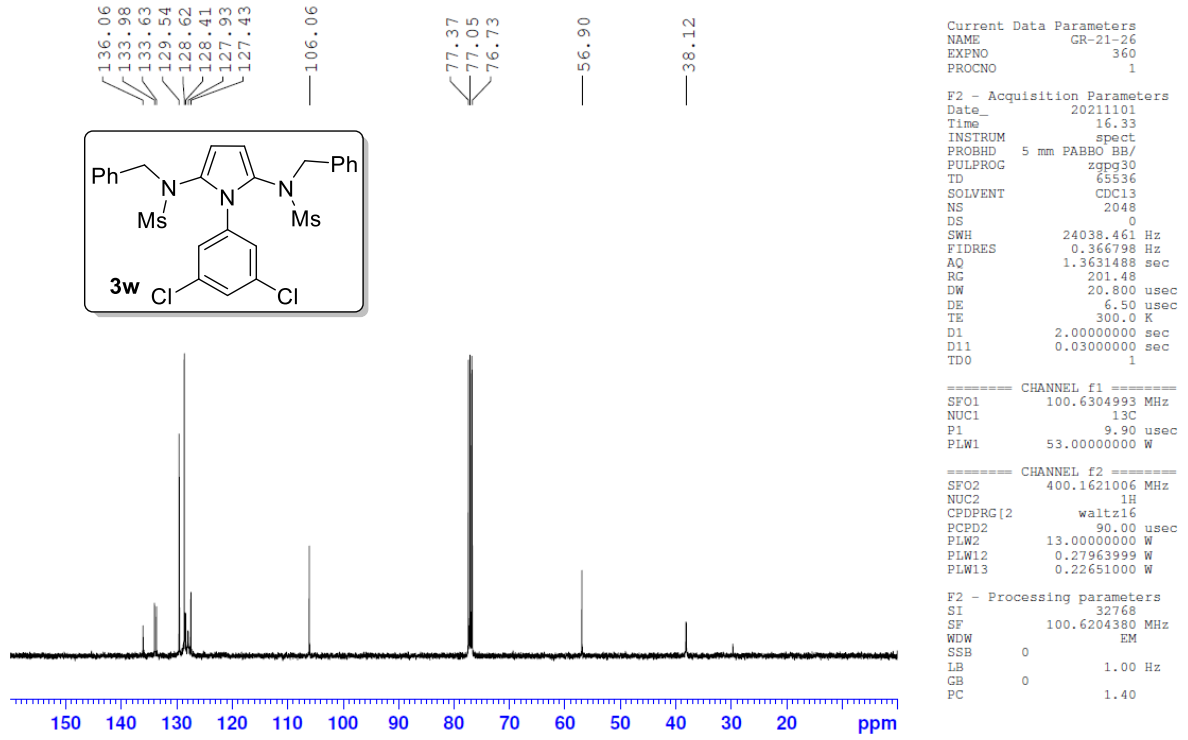

| Sample Name   | HRMS22113JAN11 | Position    | Vial 11     | Instrument Name | Instrument 1 | User Name              |
|---------------|----------------|-------------|-------------|-----------------|--------------|------------------------|
| Inj Vol       | 1              | InjPosition |             | SampleType      | Sample       | IRM Calibration Status |
| Data Filename | NG-19-01.d     | ACQ Method  | ISOCRATIC.m | Comment         |              | Acquired Time          |

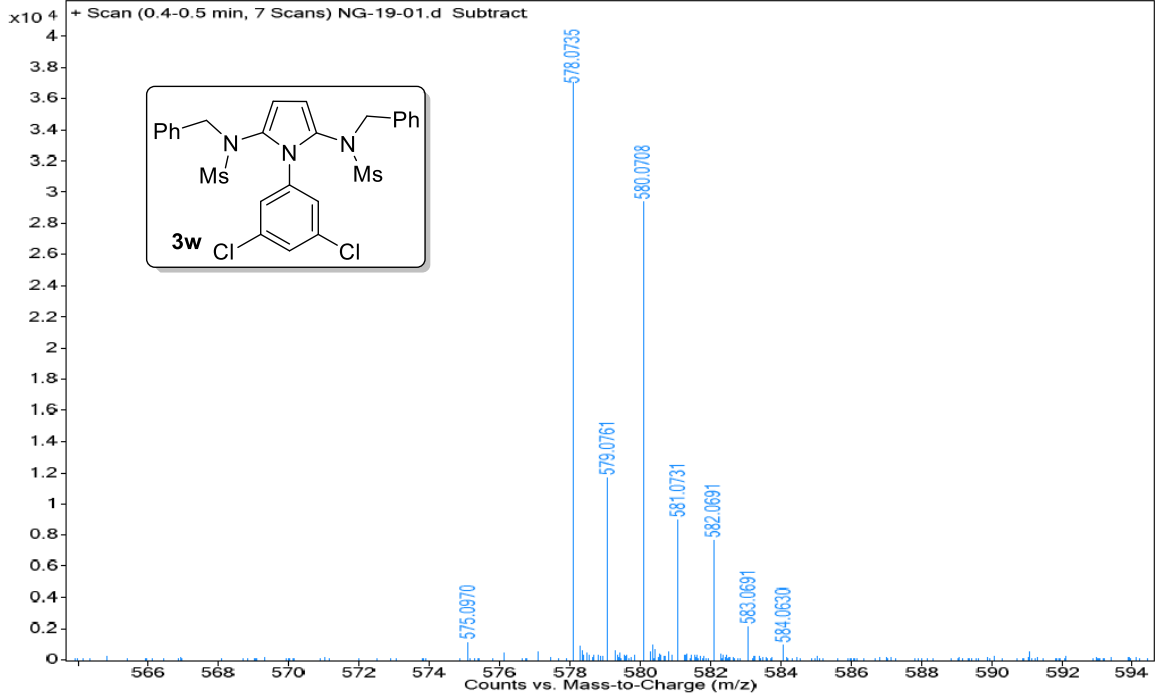

GR-21-20

 $^1\text{H}$  NMR,  $\text{CDCl}_3$ , 500 MHz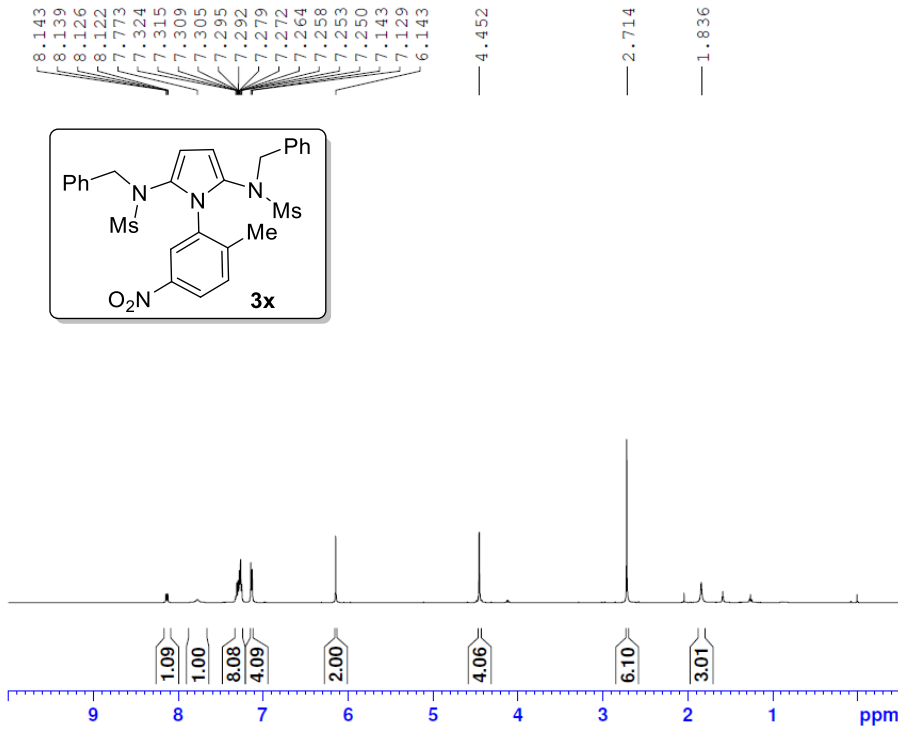

Current Data Parameters  
 NAME GR-21-20  
 EXPNO 530  
 PROCNO 1

F2 - Acquisition Parameters  
 Date\_ 20211029  
 Time 11.37  
 INSTRUM spect  
 PROBHD 5 mm PATXI 1H/  
 PULPROG zg30  
 TD 65536  
 SOLVENT  $\text{CDCl}_3$   
 NS 16  
 DS 2  
 SWH 10026.738 Hz  
 FIDRES 0.152996 Hz  
 AQ 3.2680619 sec  
 RG 87.95  
 DW 49.867 usec  
 DE 6.50 usec  
 TE 303.0 K  
 D1 1.00000000 sec  
 TDO 1

===== CHANNEL f1 =====  
 SFO1 500.6794419 MHz  
 NUC1 1H  
 P1 6.45 usec  
 PLW1 13.60000038 W

F2 - Processing parameters  
 SI 65536  
 SF 500.6763626 MHz  
 WDW EM  
 SSB 0  
 LB 0.30 Hz  
 GB 0  
 PC 1.00

GR-21-20

 $^{13}\text{C}$  NMR,  $\text{CDCl}_3$ , 125 MHz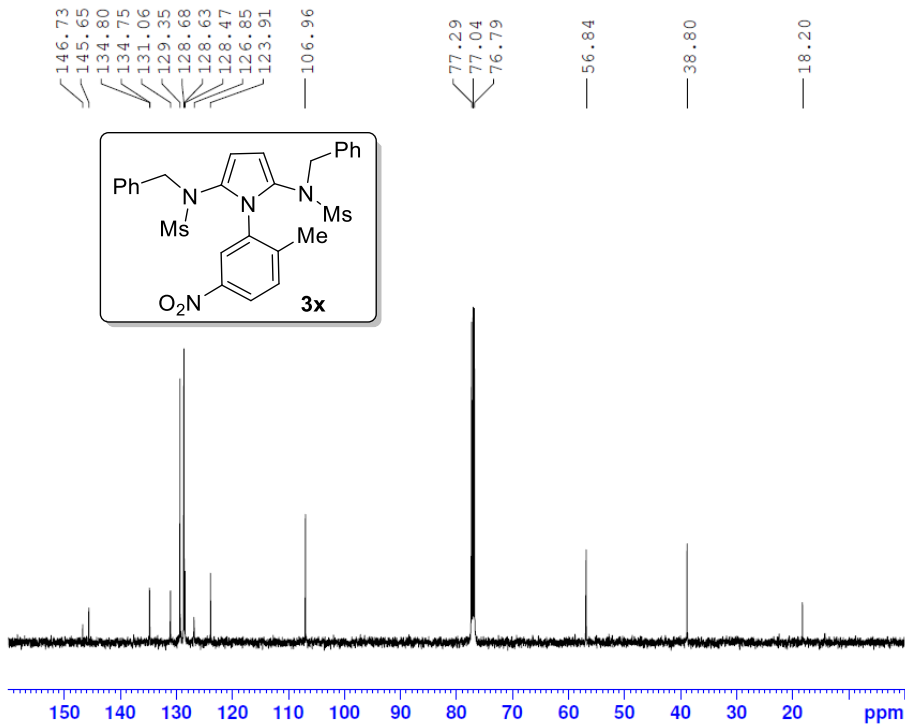

Current Data Parameters  
 NAME GR-21-20  
 EXPNO 540  
 PROCNO 1

F2 - Acquisition Parameters  
 Date\_ 20211029  
 Time 11.39  
 INSTRUM spect  
 PROBHD 5 mm PATXI 1H/  
 PULPROG zgpg30  
 TD 65536  
 SOLVENT  $\text{CDCl}_3$   
 NS 2048  
 DS 4  
 SWH 29761.904 Hz  
 FIDRES 0.454131 Hz  
 AQ 1.1010048 sec  
 RG 56.22  
 DW 16.800 usec  
 DE 6.50 usec  
 TE 303.0 K  
 D1 2.00000000 sec  
 D11 0.03000000 sec  
 TDO 1

===== CHANNEL f1 =====  
 SFO1 125.9077573 MHz  
 NUC1 13C  
 P1 9.23 usec  
 PLW1 244.00000000 W

===== CHANNEL f2 =====  
 SFO2 500.6783527 MHz  
 NUC2 1H  
 CPDPRG[2] waltz16  
 PCPD2 80.00 usec  
 PLW2 13.60000038 W  
 PLW12 0.08840500 W  
 PLW13 0.05657900 W

F2 - Processing parameters  
 SI 32768  
 SF 125.8951680 MHz  
 WDW EM  
 SSB 0  
 LB 2.00 Hz  
 GB 0  
 PC 1.40

Sample Name HRMS22107JAN19 Position Vial 19 Instrument Name Instrument 1 User Name  
 Inj Vol 1 InjPosition SampleType Sample IRM Calibration Status Some Ions Missed  
 Data Filename NG-18-12.d ACQ Method ISOCRATIC.m Comment Acquired Time 1/7/2022 12:27:19 PM

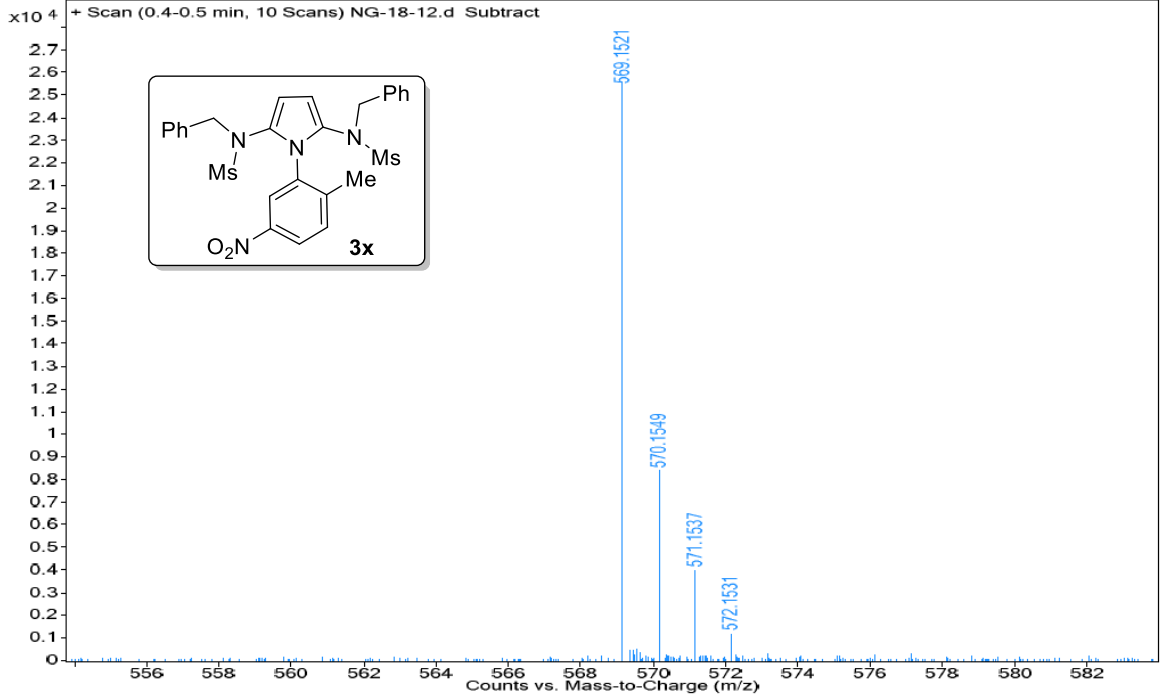

GR 21 24 D

<sup>1</sup>H NMR, CDCl<sub>3</sub>, 400 MHz

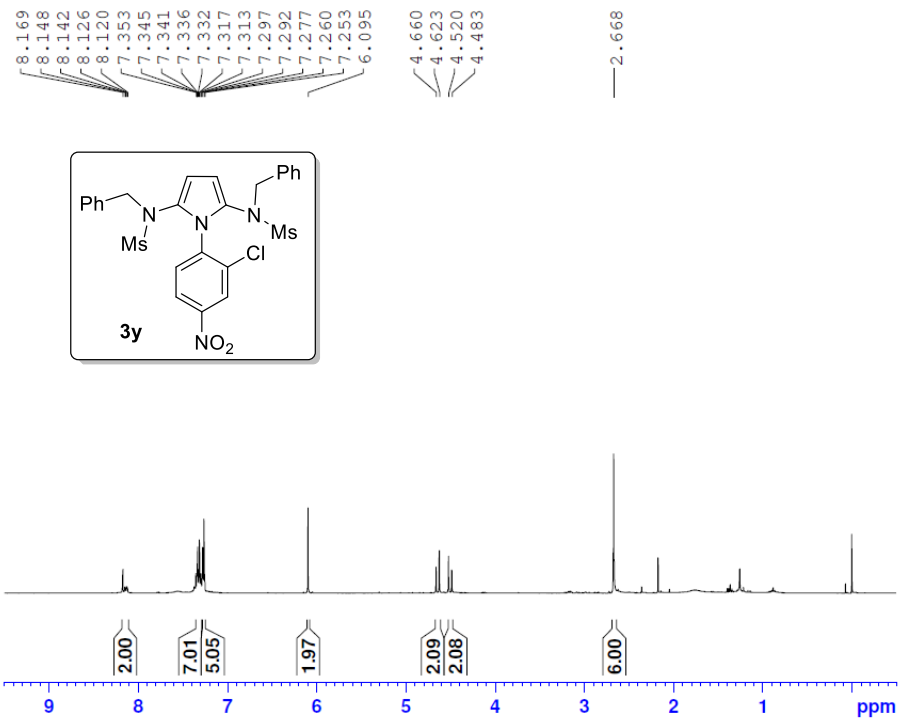

```

Current Data Parameters
NAME Desktop
EXPNO 410
PROCNO 1

F2 - Acquisition Parameters
Date_ 20211101
Time 12.52
INSTRUM spect
PROBHD 5 mm PABBO BB/
PULPROG zg30
TD 65536
SOLVENT CDCl3
NS 8
DS 0
SWH 9615.385 Hz
FIDRES 0.146719 Hz
AQ 3.4078720 sec
RG 129.57
DW 52.000 usec
DE 6.50 usec
TE 300.0 K
D1 1.00000000 sec
TD0 1

===== CHANNEL f1 =====
SF01 400.1629712 MHz
NUC1 1H
P1 13.20 usec
PLW1 13.00000000 W

F2 - Processing parameters
SI 65536
SF 400.1605091 MHz
WDW EM
SSB 0
LB 0.30 Hz
GB 0
PC 1.00
  
```

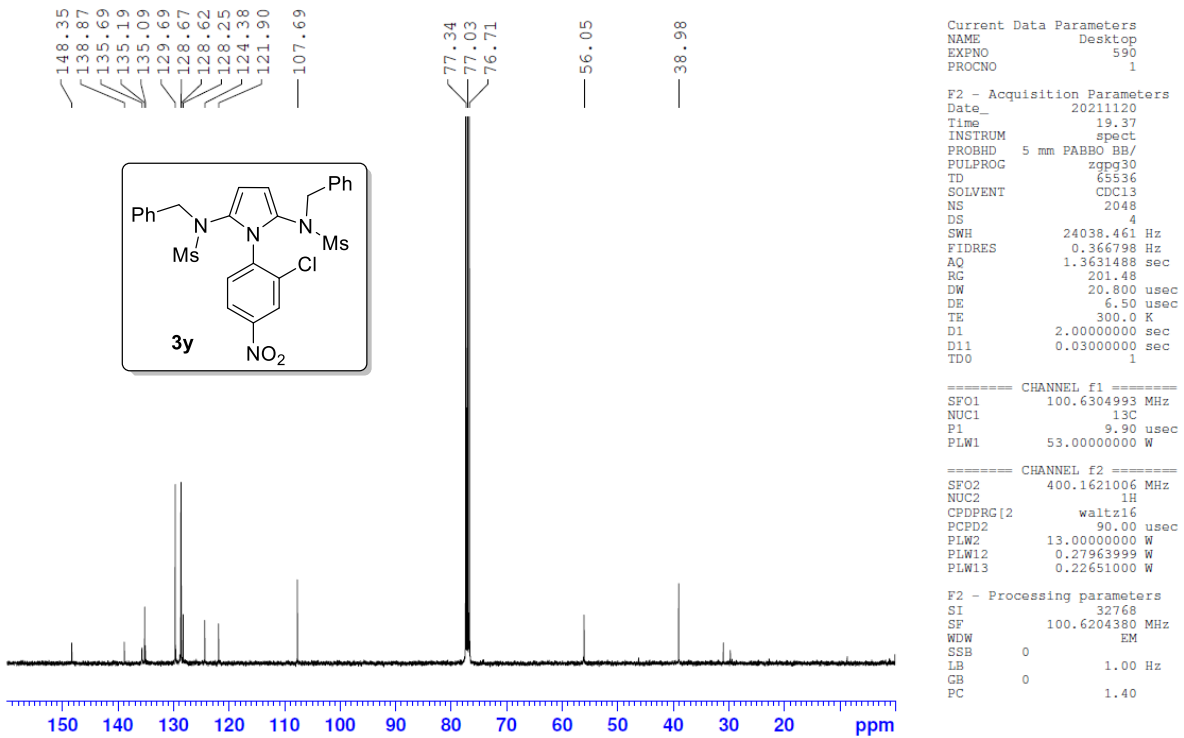

| Sample Name   | HRMS22110JAN16 | Position    | Vial 16     | Instrument Name | Instrument 1 | User Name              |                       |
|---------------|----------------|-------------|-------------|-----------------|--------------|------------------------|-----------------------|
| Inj Vol       | 1              | InjPosition |             | SampleType      | Sample       | IRM Calibration Status | Some Ions Missed      |
| Data Filename | NG-19-19.d     | ACQ Method  | ISOCRATIC.m | Comment         |              | Acquired Time          | 1/10/2022 12:02:33 PM |

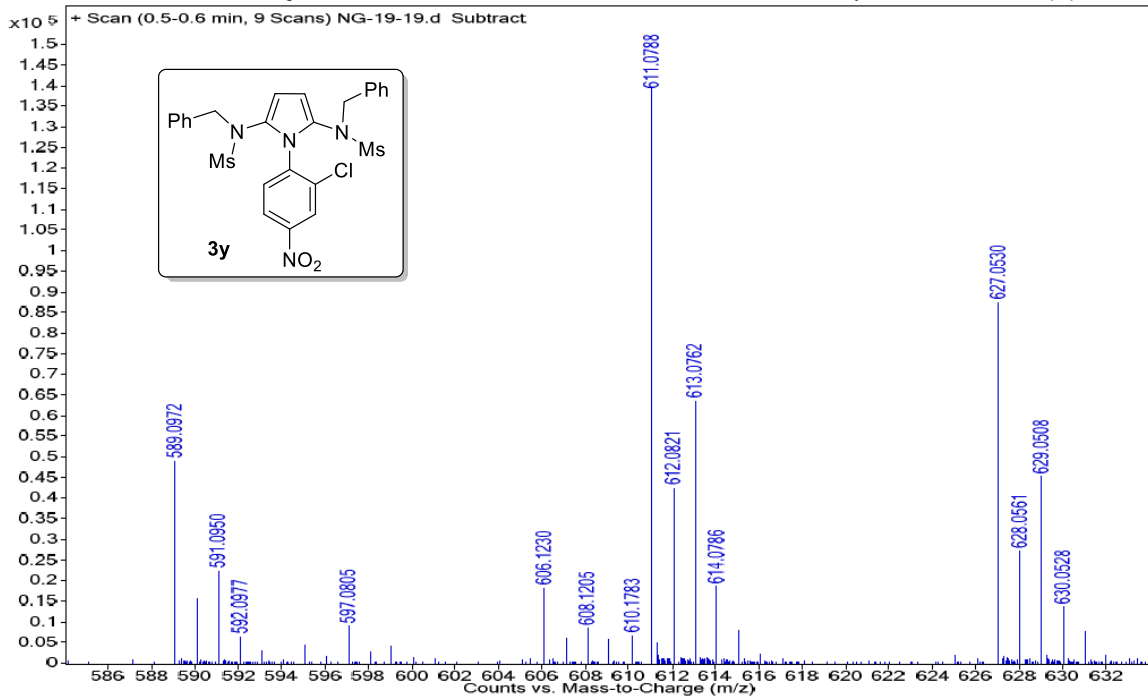

gr-21-17

<sup>1</sup>H NMR, CDCl<sub>3</sub>, 400 MHz

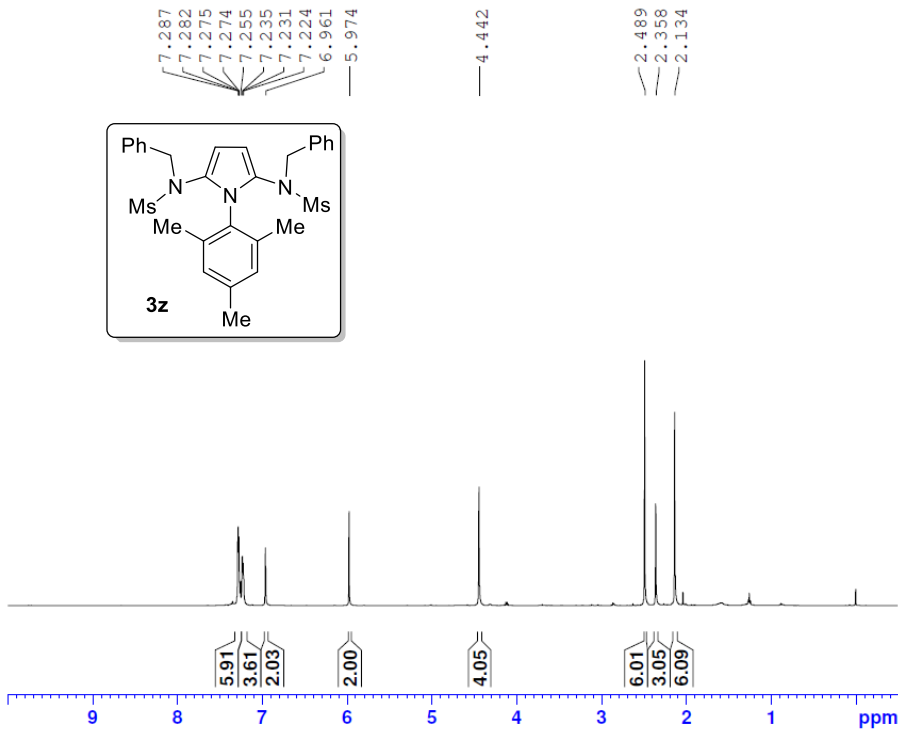

```

Current Data Parameters
NAME      GR-21-17
EXPNO    370
PROCNO   1

F2 - Acquisition Parameters
Date_    20211101
Time     15.08
INSTRUM  spect
PROBHD   5 mm PATXI 1H/
PULPROG  zg30
TD       65536
SOLVENT  CDCl3
NS       16
DS       2
SWH      10026.738 Hz
FIDRES   0.152996 Hz
AQ       3.2680619 sec
RG       61.7
DW       49.867 usec
DE       6.50 usec
TE       303.0 K
D1       1.00000000 sec
TDO      1

===== CHANNEL f1 =====
SFO1    500.6794419 MHz
NUC1    1H
P1      6.45 usec
PLW1    13.60000038 W

F2 - Processing parameters
SI      65536
SF      500.6763641 MHz
WDW     EM
SSB     0
LB      0.30 Hz
GB      0
PC      1.00
    
```

gr-21-17

<sup>13</sup>C NMR, CDCl<sub>3</sub>, 125 MHz

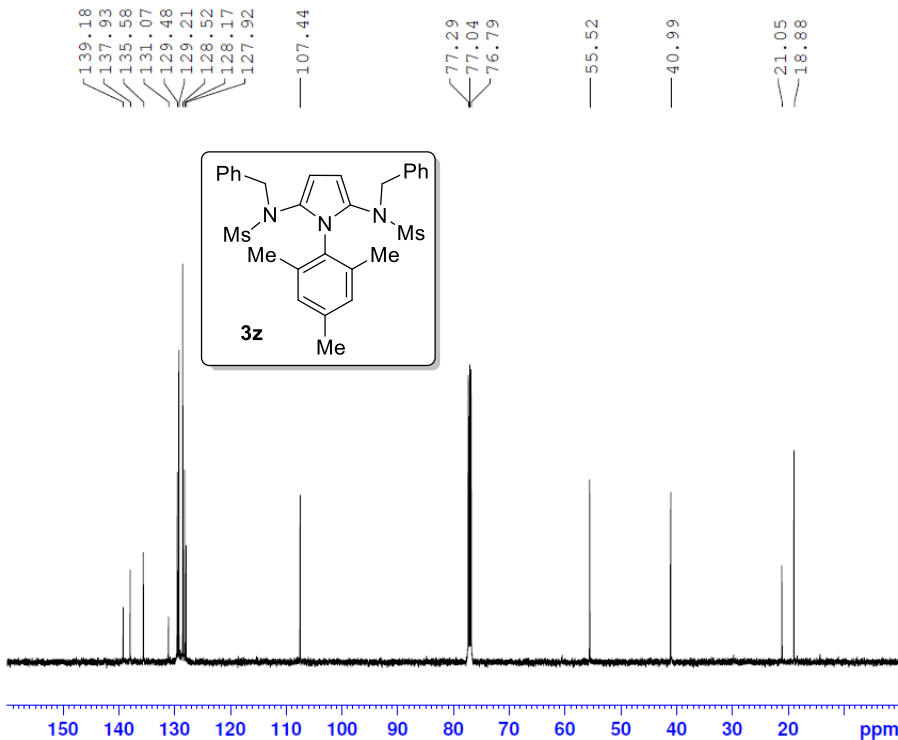

```

Current Data Parameters
NAME      GR-21-17
EXPNO    380
PROCNO   1

F2 - Acquisition Parameters
Date_    20211101
Time     16.04
INSTRUM  spect
PROBHD   5 mm PATXI 1H/
PULPROG  zgpg30
TD       65536
SOLVENT  CDCl3
NS       1024
DS       4
SWH      29761.904 Hz
FIDRES   0.454131 Hz
AQ       1.1010048 sec
RG       56.22
DW       16.800 usec
DE       6.50 usec
TE       303.0 K
D1       2.00000000 sec
D11      0.03000000 sec
TDO      1

===== CHANNEL f1 =====
SFO1    125.9077573 MHz
NUC1    13C
P1      9.23 usec
PLW1    244.00000000 W

===== CHANNEL f2 =====
SFO2    500.6783527 MHz
NUC2    1H
CPDPRG2  waltz16
PCPD2   80.00 usec
PLW2    13.60000038 W
PLW12   0.08840500 W
PLW13   0.05657900 W

F2 - Processing parameters
SI      32768
SF      125.8951680 MHz
WDW     EM
SSB     0
LB      1.00 Hz
GB      0
PC      1.40
    
```

Sample Name HRMS22113JAN12 Position Vial 12 Instrument Name Instrument 1 User Name  
 Inj Vol 1 InjPosition Sample IRM Calibration Status Some Ions Missed  
 Data Filename NG-19-02.d ACQ Method ISOCRATIC.m Comment Acquired Time 1/13/2022 12:16:27 PM

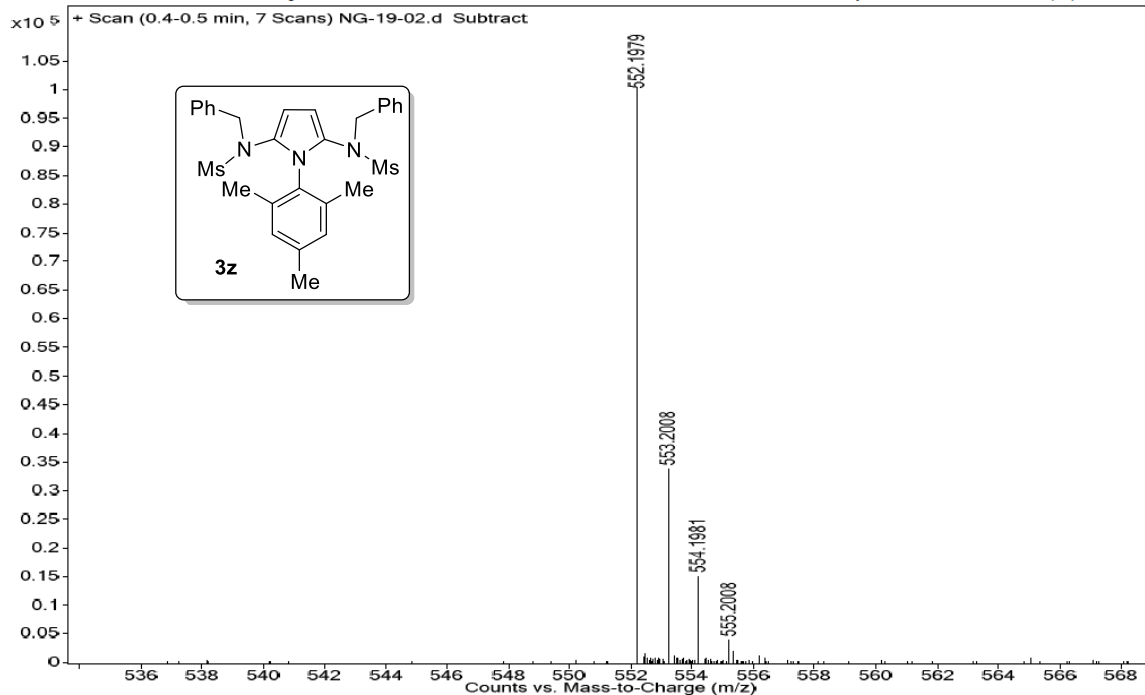

GR-21-57A

<sup>1</sup>H NMR, CDCl<sub>3</sub>, 400 MHz

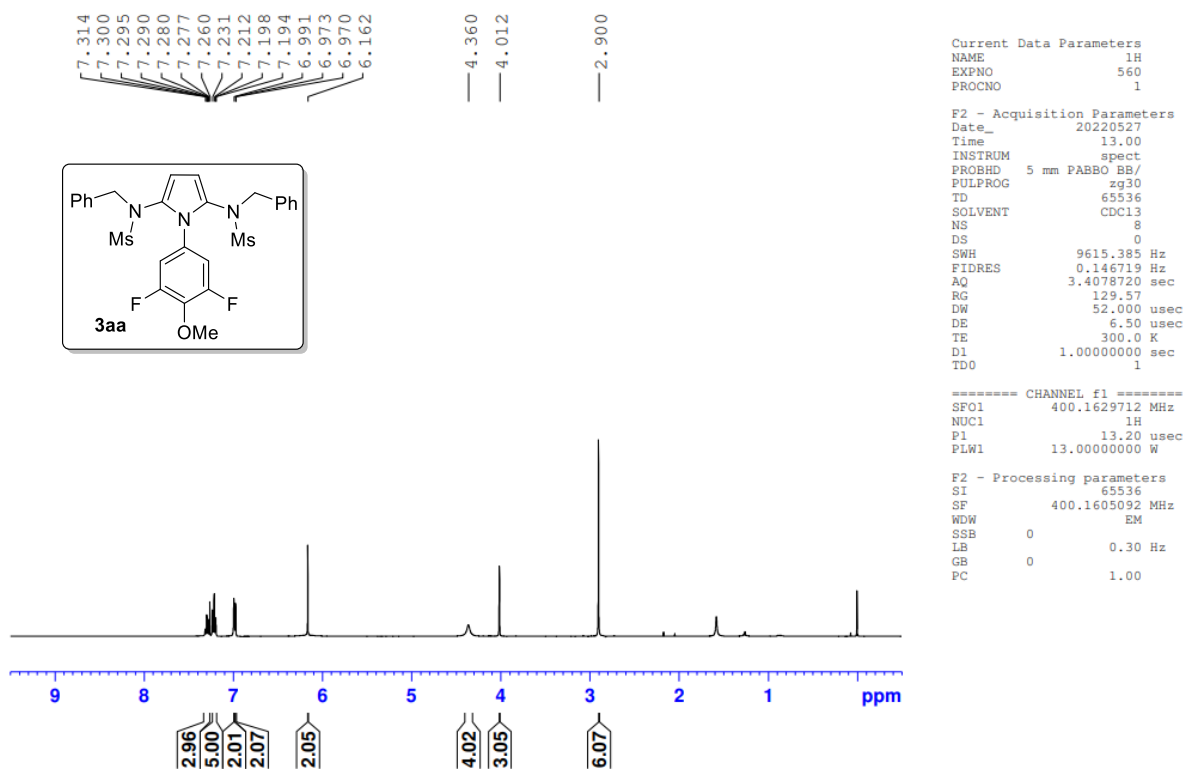

GR 21 57L

 $^{13}\text{C}$  NMR,  $d_6$ -DMSO, 101 MHz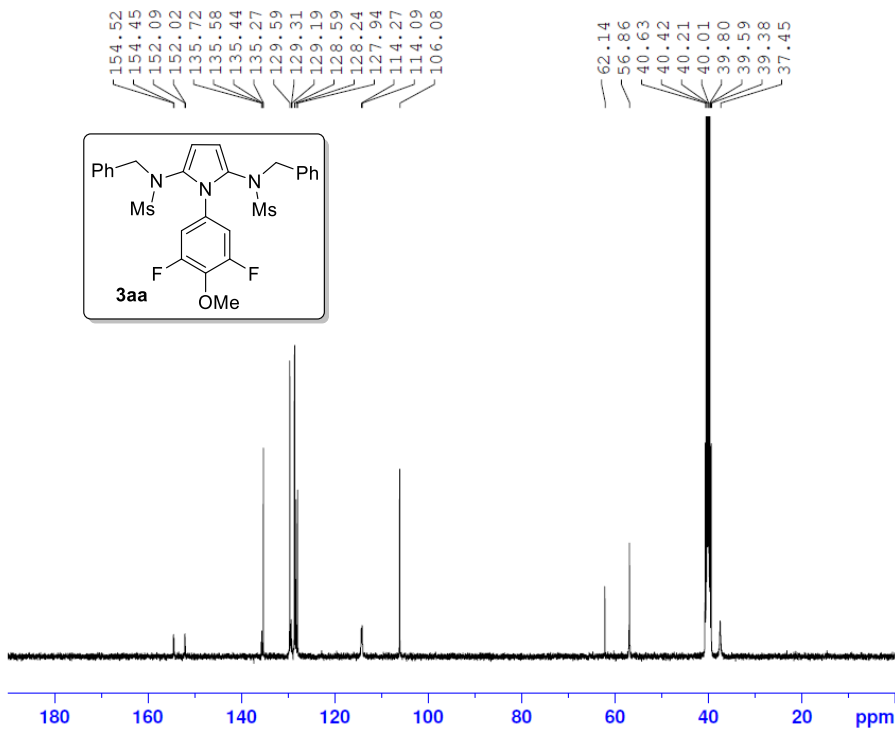

Current Data Parameters  
 NAME GR-21-57A  
 EXPNO 350  
 PROCNO 1

F2 - Acquisition Parameters  
 Date\_ 20220212  
 Time\_ 5.18  
 INSTRUM spect  
 PROBHD 5 mm PABBO BB/  
 PULPROG zgpg30  
 TD 65536  
 SOLVENT DMSO  
 NS 2048  
 DS 0  
 SWH 24038.461 Hz  
 FIDRES 0.366798 Hz  
 AQ 1.3631488 sec  
 RG 201.48  
 DW 20.800 usec  
 DE 6.50 usec  
 TE 300.0 K  
 D1 2.00000000 sec  
 D11 0.03000000 sec  
 TDO 1

===== CHANNEL f1 =====  
 SFO1 100.6304993 MHz  
 NUC1 13C  
 P1 9.90 usec  
 PLW1 53.00000000 W

===== CHANNEL f2 =====  
 SFO2 400.1621006 MHz  
 NUC2 1H  
 CPDPRG2 waltz16  
 PCPD2 90.00 usec  
 PLW2 13.00000000 W  
 PLW12 0.27963999 W  
 PLW13 0.22651000 W

F2 - Processing parameters  
 SI 32768  
 SF 100.6204380 MHz  
 WDW EM  
 SSB 0  
 LB 1.00 Hz  
 GB 0  
 PC 1.40

gr-21-57

 $^{19}\text{F}$  NMR,  $\text{CDCl}_3$ , 376 MHz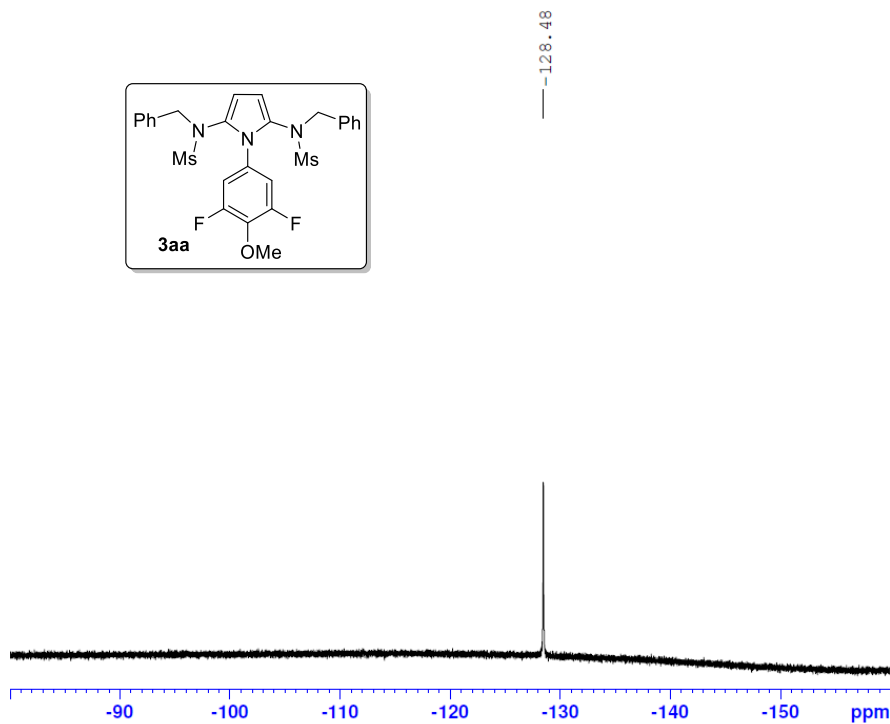

Current Data Parameters  
 NAME GR-21-57A  
 EXPNO 340  
 PROCNO 1

F2 - Acquisition Parameters  
 Date\_ 20211208  
 Time\_ 12.33  
 INSTRUM spect  
 PROBHD 5 mm PABBO BB/  
 PULPROG zgfhigqn.2  
 TD 131072  
 SOLVENT CDCl3  
 NS 16  
 DS 4  
 SWH 89285.711 Hz  
 FIDRES 0.681196 Hz  
 AQ 0.7340032 sec  
 RG 201.48  
 DW 5.600 usec  
 DE 6.50 usec  
 TE 300.1 K  
 D1 1.00000000 sec  
 D11 0.03000000 sec  
 D12 0.00002000 sec  
 TDO 1

===== CHANNEL f1 =====  
 SFO1 376.4894122 MHz  
 NUC1 19F  
 P1 15.00 usec  
 PLW1 21.00000000 W

===== CHANNEL f2 =====  
 SFO2 400.1621006 MHz  
 NUC2 1H  
 CPDPRG2 waltz16  
 PCPD2 90.00 usec  
 PLW2 13.00000000 W  
 PLW12 0.27963999 W

F2 - Processing parameters  
 SI 65536  
 SF 376.5270650 MHz  
 WDW EM  
 SSB 0  
 LB 0.30 Hz  
 GB 0  
 PC 1.00



|               |                |             |             |                 |              |                        |                        |
|---------------|----------------|-------------|-------------|-----------------|--------------|------------------------|------------------------|
| Sample Name   | HRMS21I13DEC14 | Position    | Vial 14     | Instrument Name | Instrument 1 | User Name              |                        |
| Inj Vol       | 1              | InjPosition |             | SampleType      | Sample       | IRM Calibration Status | Some Ions Missed       |
| Data Filename | SH-20-453.d    | ACQ Method  | ISOCRATIC.m | Comment         |              | Acquired Time          | 12/13/2021 12:26:54 PM |

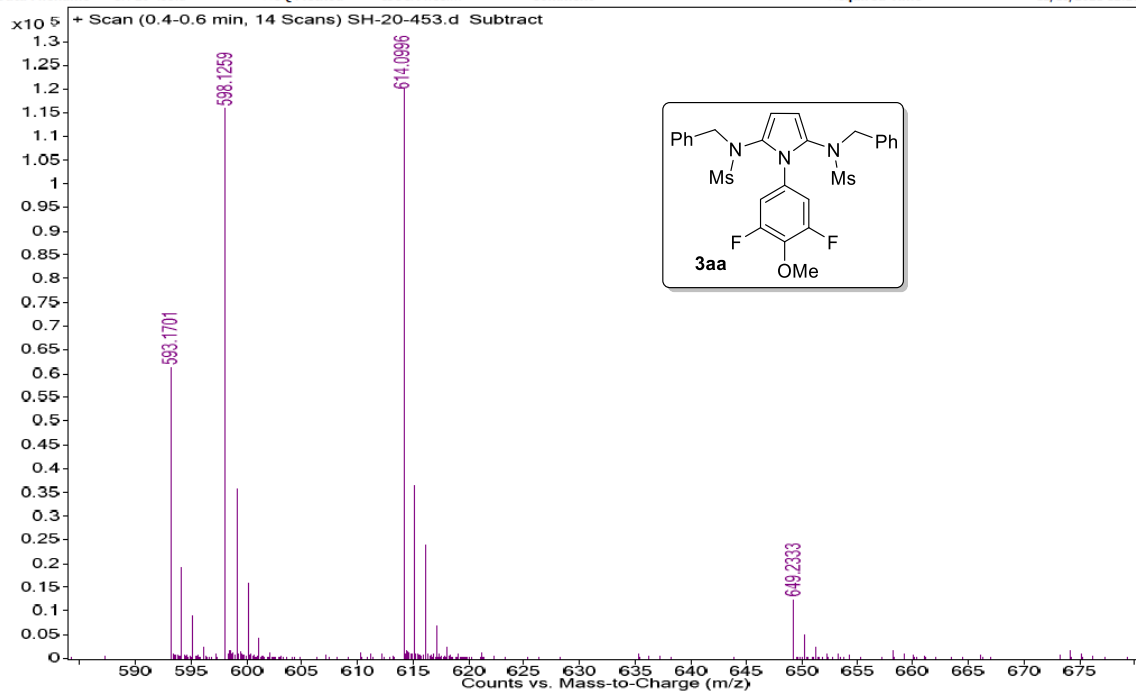

GR-21-48

<sup>1</sup>H NMR, CDCl<sub>3</sub>, 400 MHz

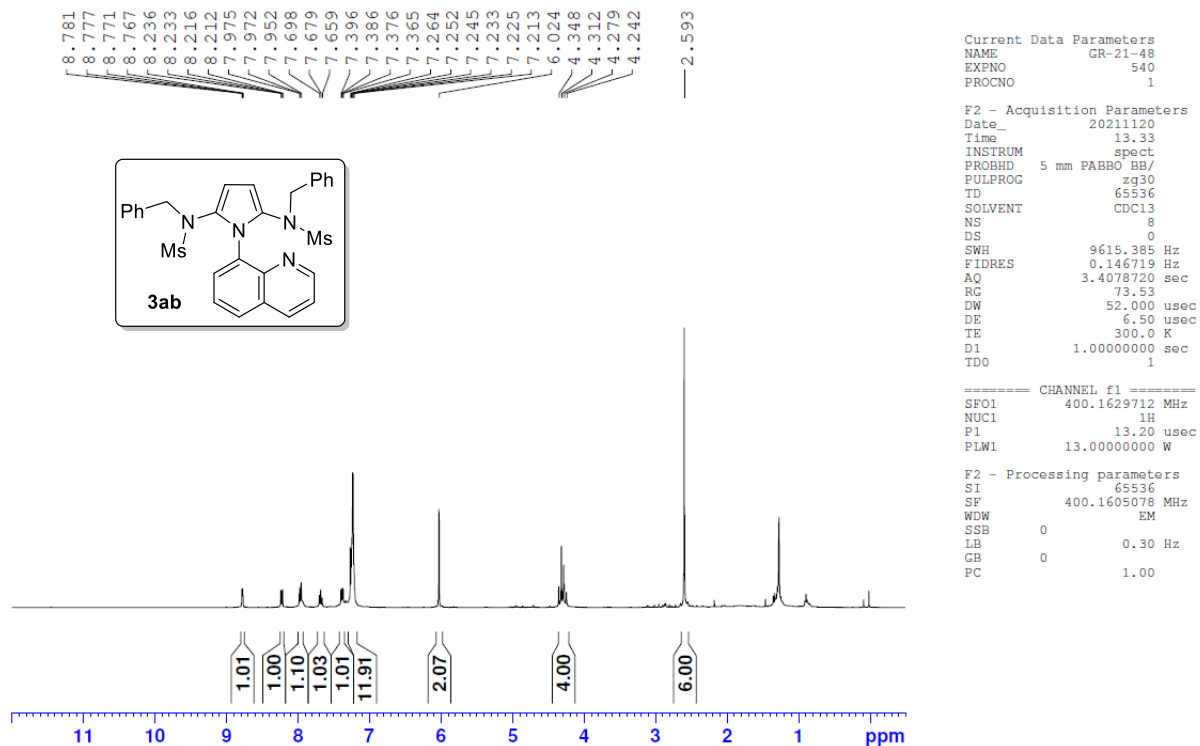

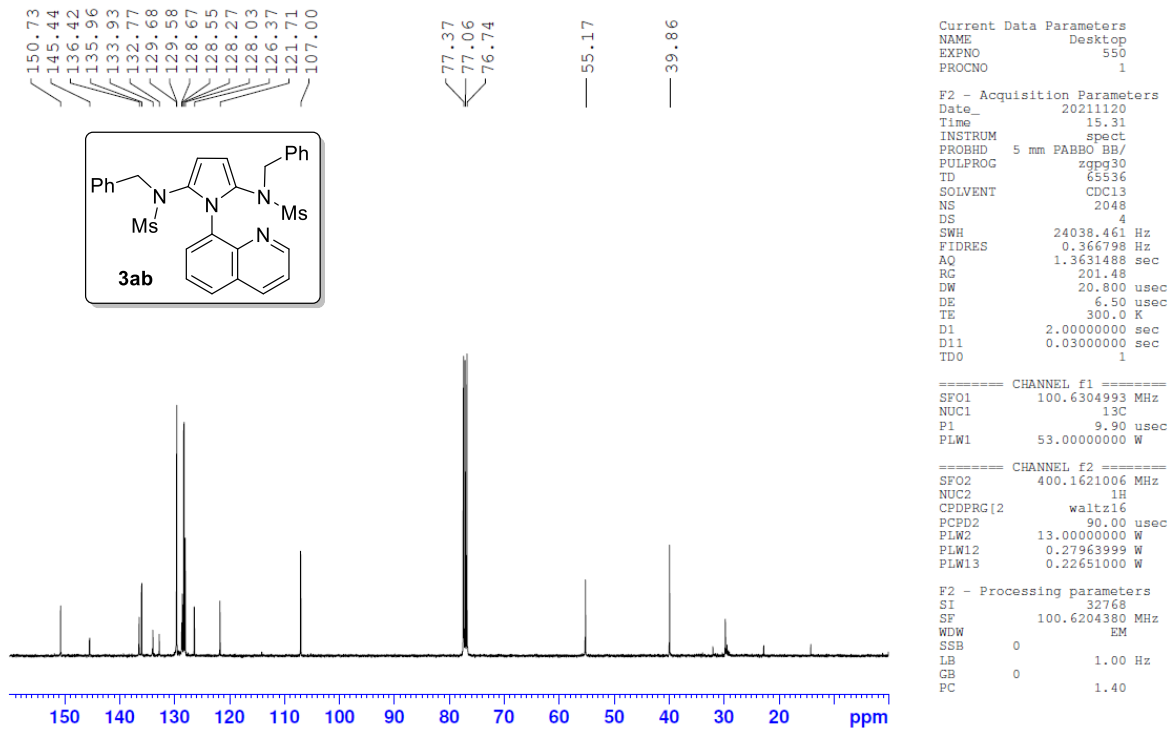

| Sample Name   | HRMS22I14JAN25 | Position    | Vial 25     | Instrument Name | Instrument 1 | User Name              |                       |
|---------------|----------------|-------------|-------------|-----------------|--------------|------------------------|-----------------------|
| Inj Vol       | 1              | InjPosition |             | SampleType      | Sample       | IRM Calibration Status | Some Ions Missed      |
| Data Filename | NG-19-19.d     | ACQ Method  | ISOCRATIC.m | Comment         |              | Acquired Time          | 1/14/2022 12:57:30 PM |

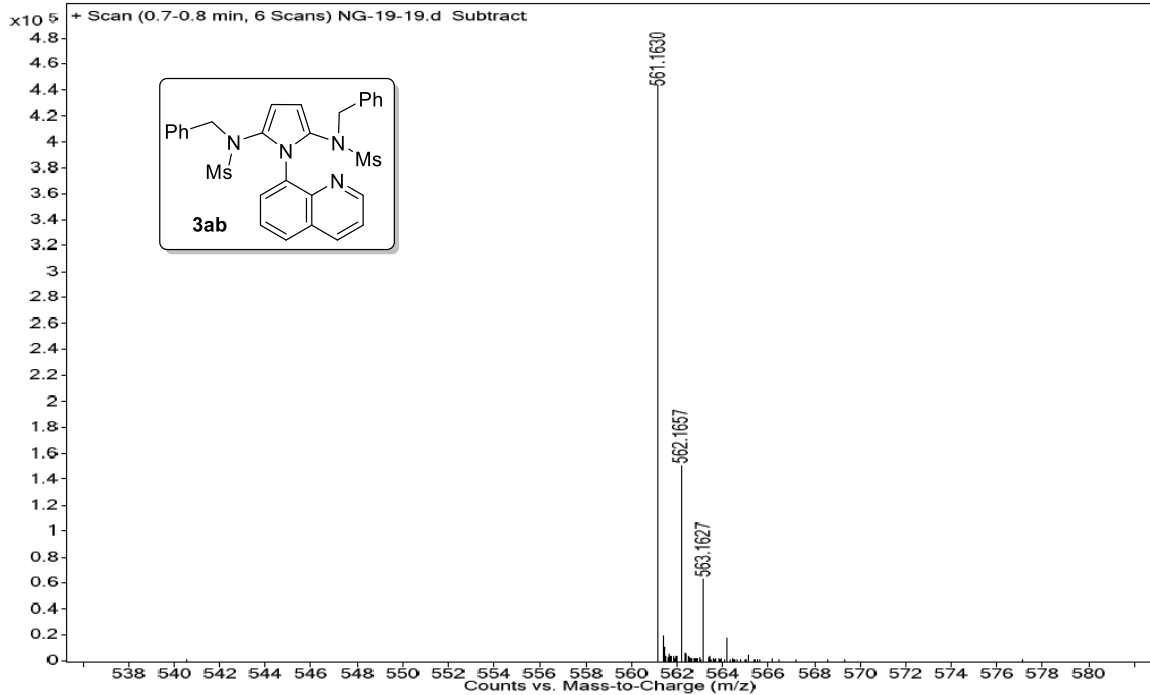

<sup>1</sup>H NMR, CDCl<sub>3</sub>, 500 MHz

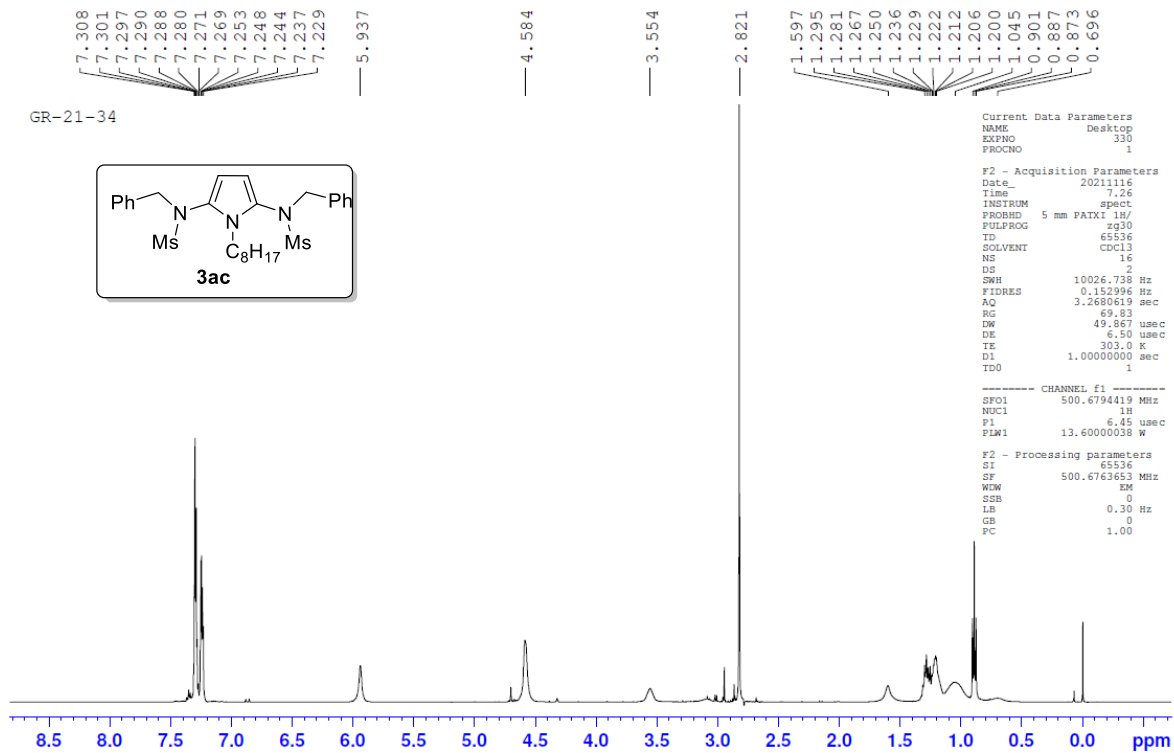

GR-21-34

<sup>13</sup>C NMR, CDCl<sub>3</sub>, 125 MHz

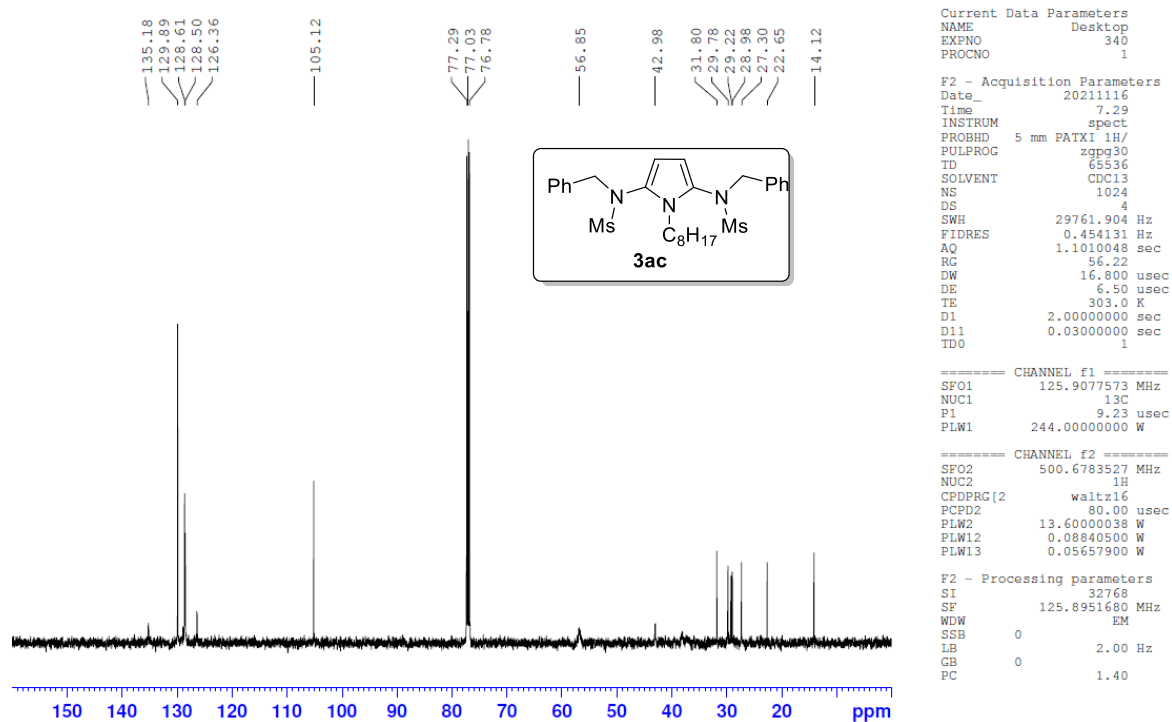

|               |                |             |             |                 |              |                        |                       |
|---------------|----------------|-------------|-------------|-----------------|--------------|------------------------|-----------------------|
| Sample Name   | HRMS21110DEC21 | Position    | Vial 21     | Instrument Name | Instrument 1 | User Name              |                       |
| Inj Vol       | 10             | InjPosition |             | SampleType      | Sample       | IRM Calibration Status | Some Ions Missed      |
| Data Filename | GR-271.d       | ACQ Method  | ISOCRATIC.m | Comment         |              | Acquired Time          | 12/10/2021 1:14:05 PM |

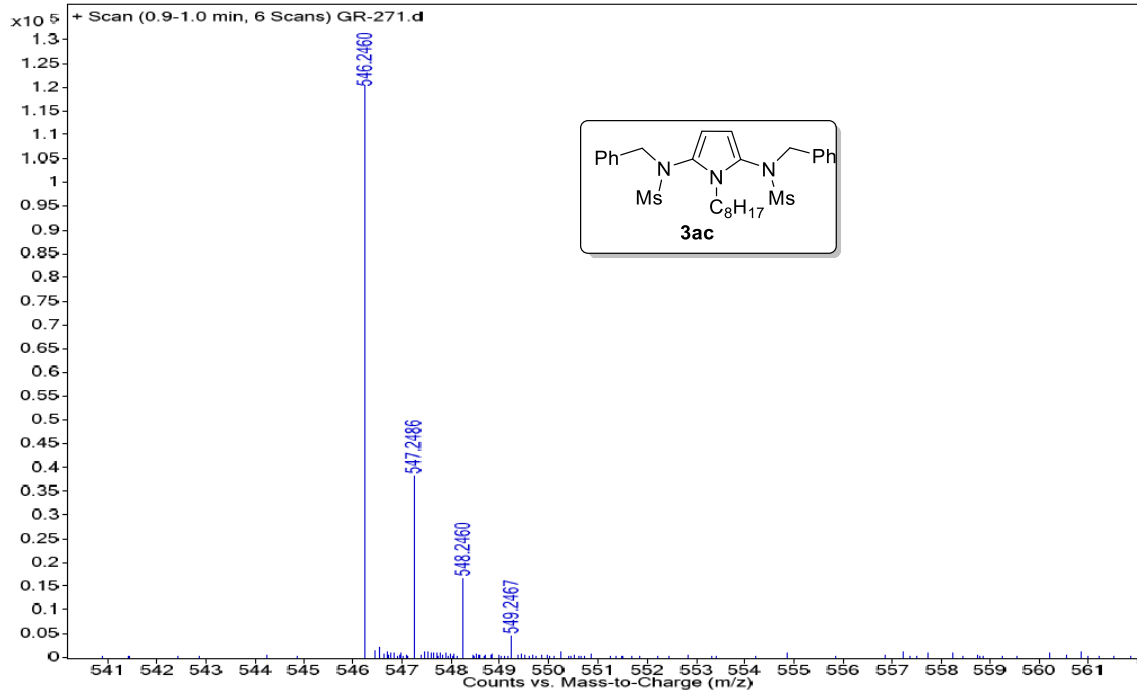

GR 21 51

<sup>1</sup>H NMR, CDCl<sub>3</sub>, 400 MHz

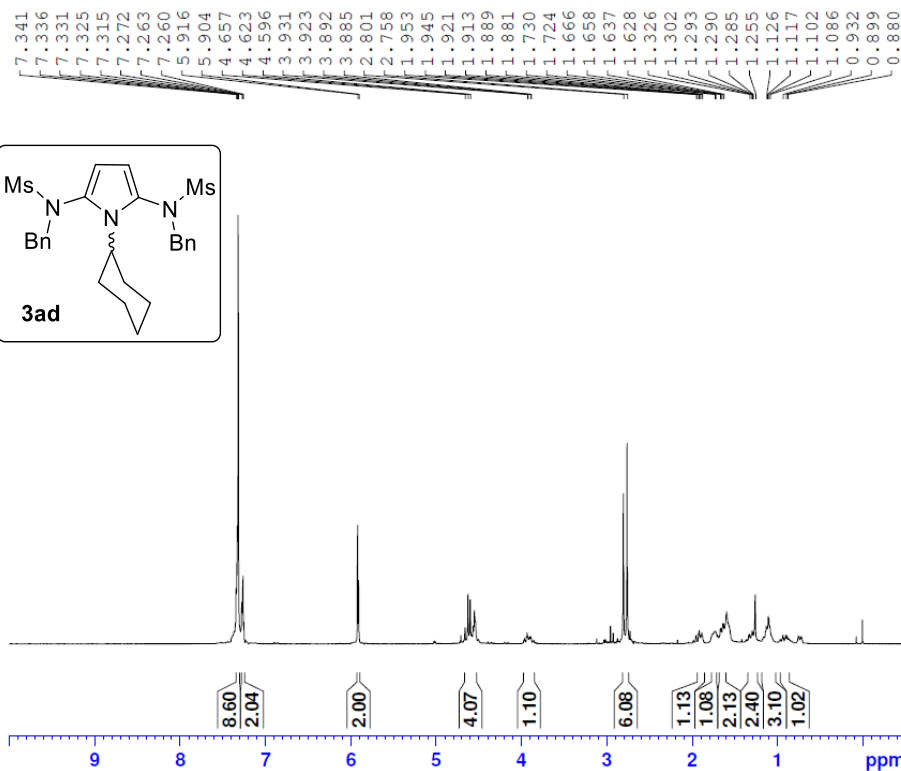

Current Data Parameters  
NAME GR-21-51  
EXPNO 340  
PROCNO 1

F2 - Acquisition Parameters  
Date\_ 20220328  
Time 14.34  
INSTRUM spect  
PROBHD 5 mm PABBO BB/  
PULPROG zg30  
TD 65536  
SOLVENT CDCl3  
NS 8  
DS 0  
SWH 9615.385 Hz  
FIDRES 0.146719 Hz  
AQ 3.4078720 sec  
RG 89.7  
DW 52.000 usec  
DE 6.50 usec  
TE 300.0 K  
D1 1.00000000 sec  
TDO 1

===== CHANNEL f1 =====  
SFO1 400.1629712 MHz  
NUC1 1H  
P1 13.20 usec  
PLW1 13.00000000 W

F2 - Processing parameters  
SI 65536  
SF 400.1605097 MHz  
WDW EM  
SSB 0  
LB 0.30 Hz  
GB 0  
PC 1.00

<sup>13</sup>C NMR, CDCl<sub>3</sub>, 125 MHz

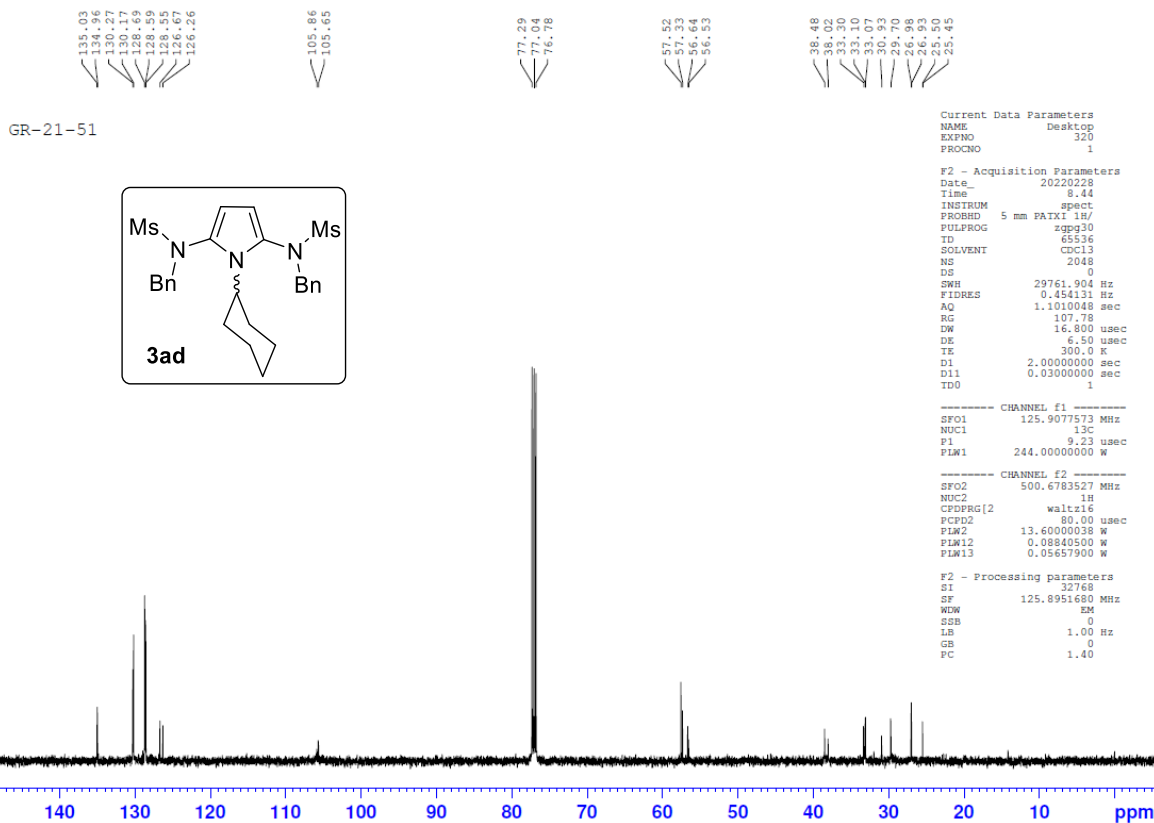

| Sample Name   | HRMS21110DEC20 | Position    | Vial 20     | Instrument Name | Instrument 1 | User Name              |                       |
|---------------|----------------|-------------|-------------|-----------------|--------------|------------------------|-----------------------|
| Inj Vol       | 10             | InjPosition |             | Sample Type     | Sample       | IRM Calibration Status | Some Ions Missed      |
| Data Filename | GR-20-MS.d     | ACQ Method  | ISOCRATIC.m | Comment         |              | Acquired Time          | 12/10/2021 1:10:32 PM |

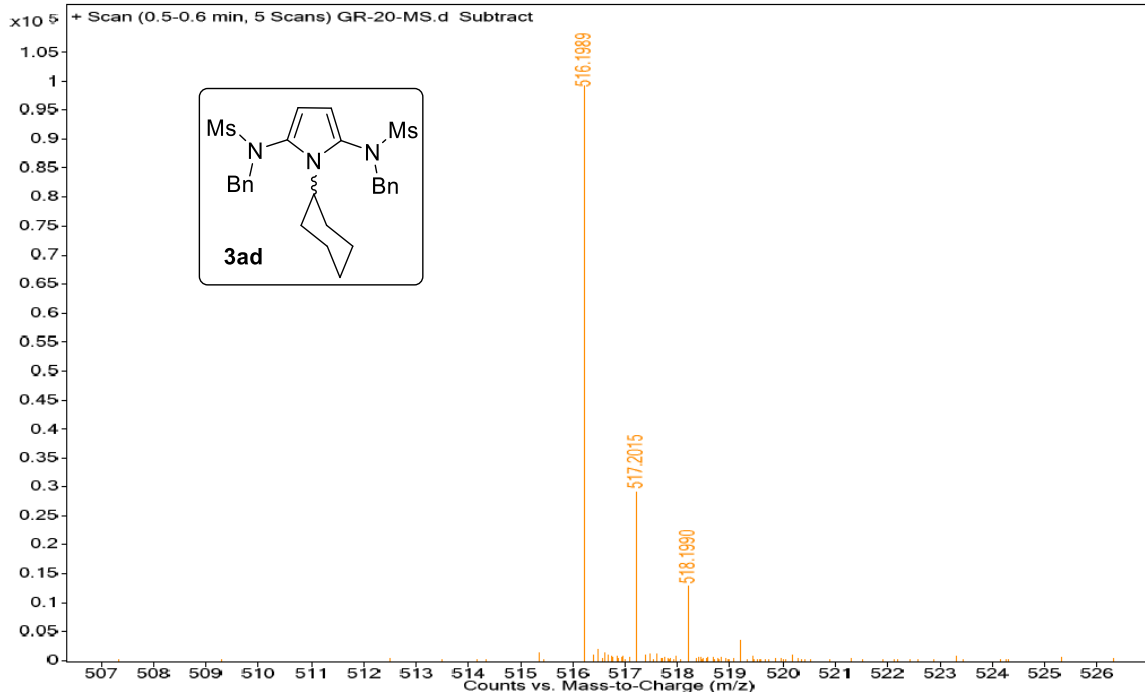

GR-21-28

 $^1\text{H}$  NMR,  $d_6$ -DMSO, 400 MHz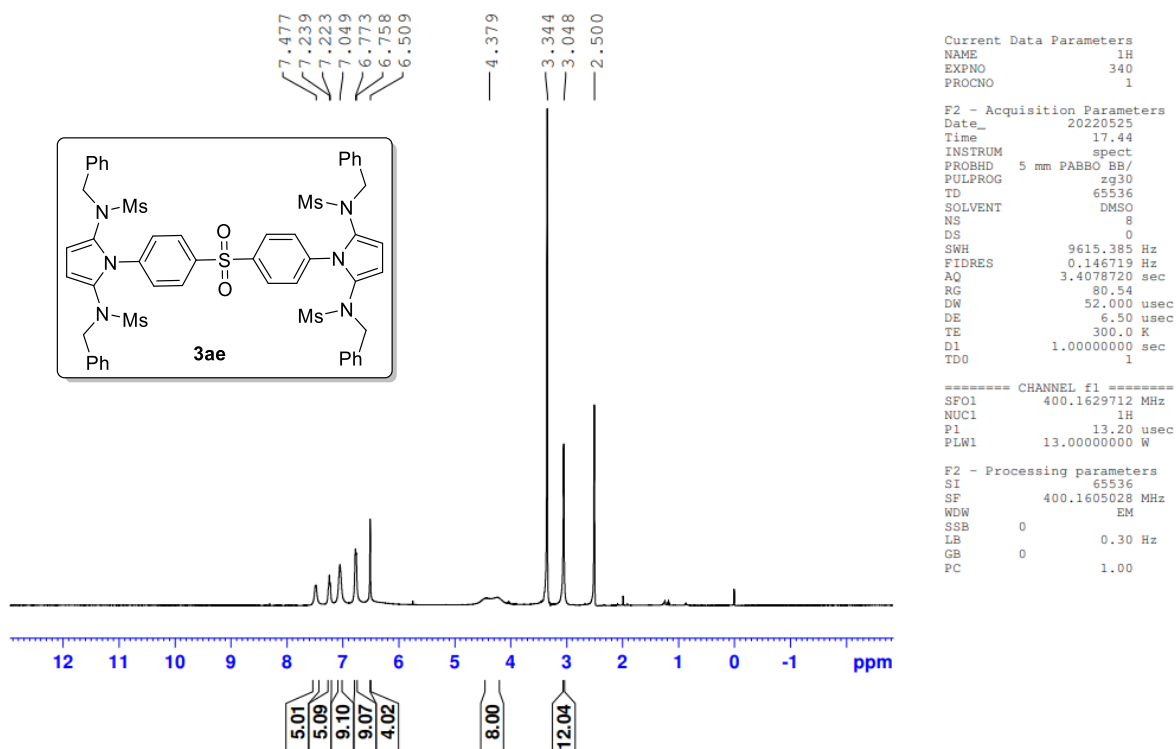 $^{13}\text{C}$  NMR,  $d_6$ -DMSO, 101 MHz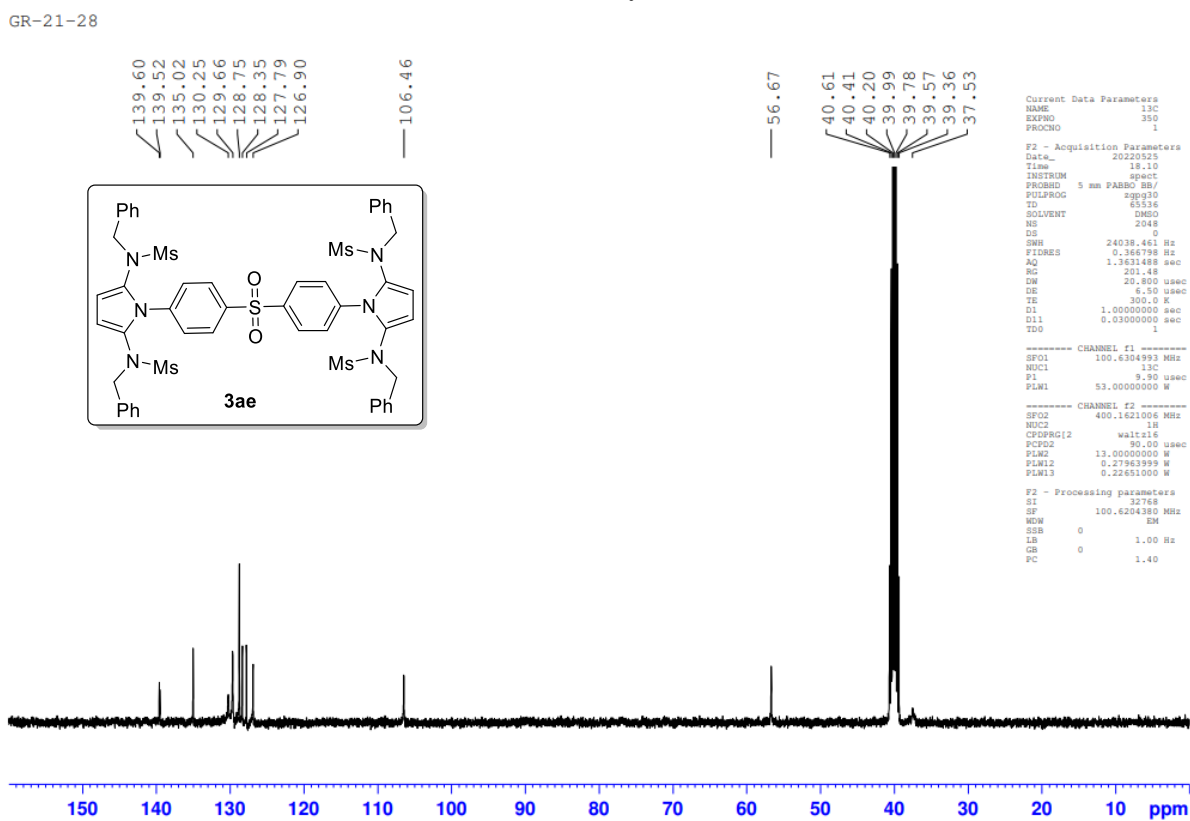

Sample Name HRMS21116DEC22 Position Vial 22 Instrument Name Instrument 1 User Name  
 Inj Vol 1 InjPosition Sample IRM Calibration Status Some Ions Missed  
 Data Filename GR-20-205D.d ACQ Method ISOCRATIC.m Comment Acquired Time 12/16/2021 12:48:43 PM

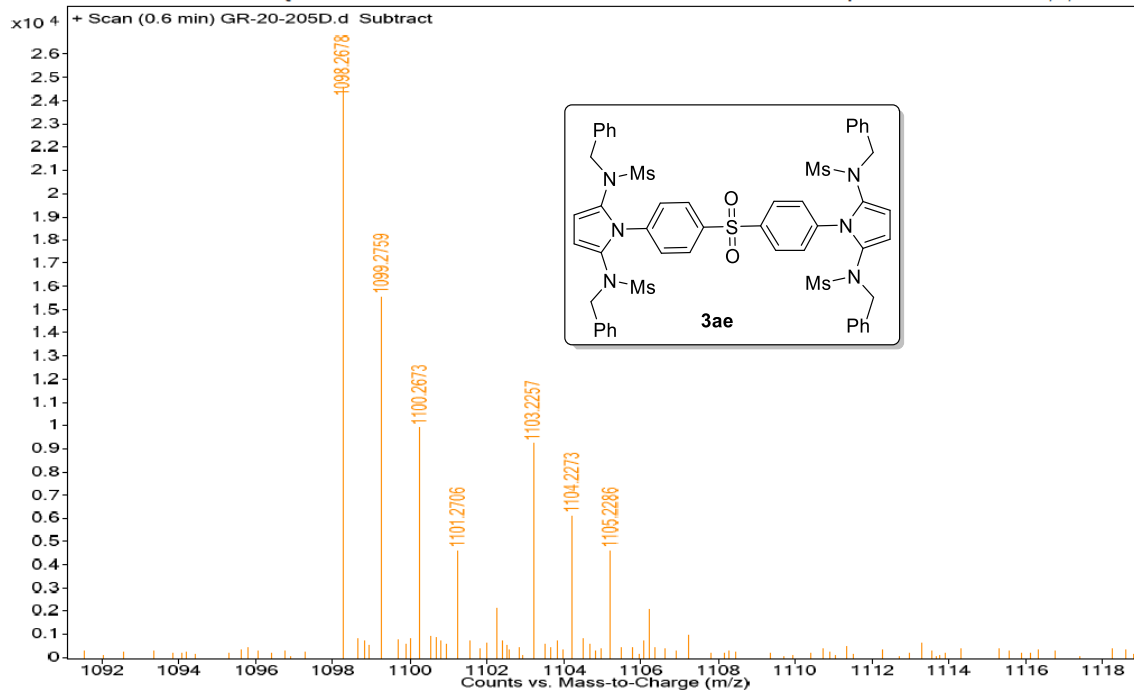

<sup>1</sup>H NMR, CDCl<sub>3</sub>, 400 MHz

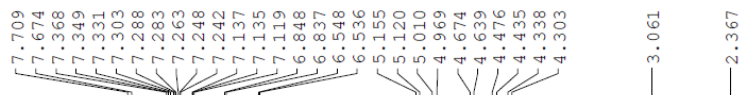

SH 21 55A

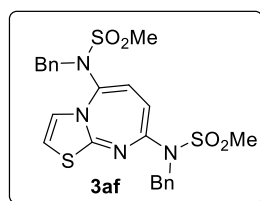

Current Data Parameters  
 NAME Desktop  
 EXPNO 450  
 PROCNO 1

F2 - Acquisition Parameters  
 Date\_ 20220413  
 Time 15.00  
 INSTRUM spect  
 PULPROG 5 mm PABBO 90/  
 PULPROG zg30  
 TD 65536  
 SOLVENT CDCl3  
 NS 0  
 DS 0  
 SWH 9615.385 Hz  
 FIDRES 0.145718 Hz  
 AQ 3.4078720 sec  
 MC 114.75  
 INW 52.000 usec  
 DE 6.50 usec  
 TE 300.2 K  
 D1 1.00000000 sec  
 TDD 1

==== CHANNEL F1 =====  
 SFO1 400.142912 MHz  
 NUC1 1H  
 P1 13.20 usec  
 PLW1 13.00000000 W  
 F2 - Processing parameters  
 SI 65536  
 SF 400.1409084 MHz  
 WDW EM  
 SSB 0  
 LB 0.30 Hz  
 GB 0  
 PC 1.00

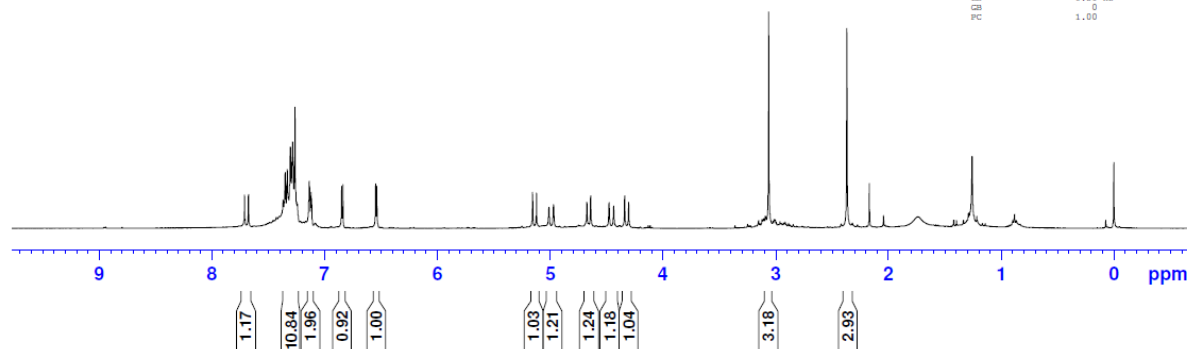

<sup>13</sup>C NMR, CDCl<sub>3</sub>, 101 MHz

SH-21-44

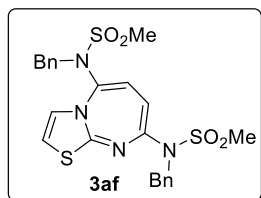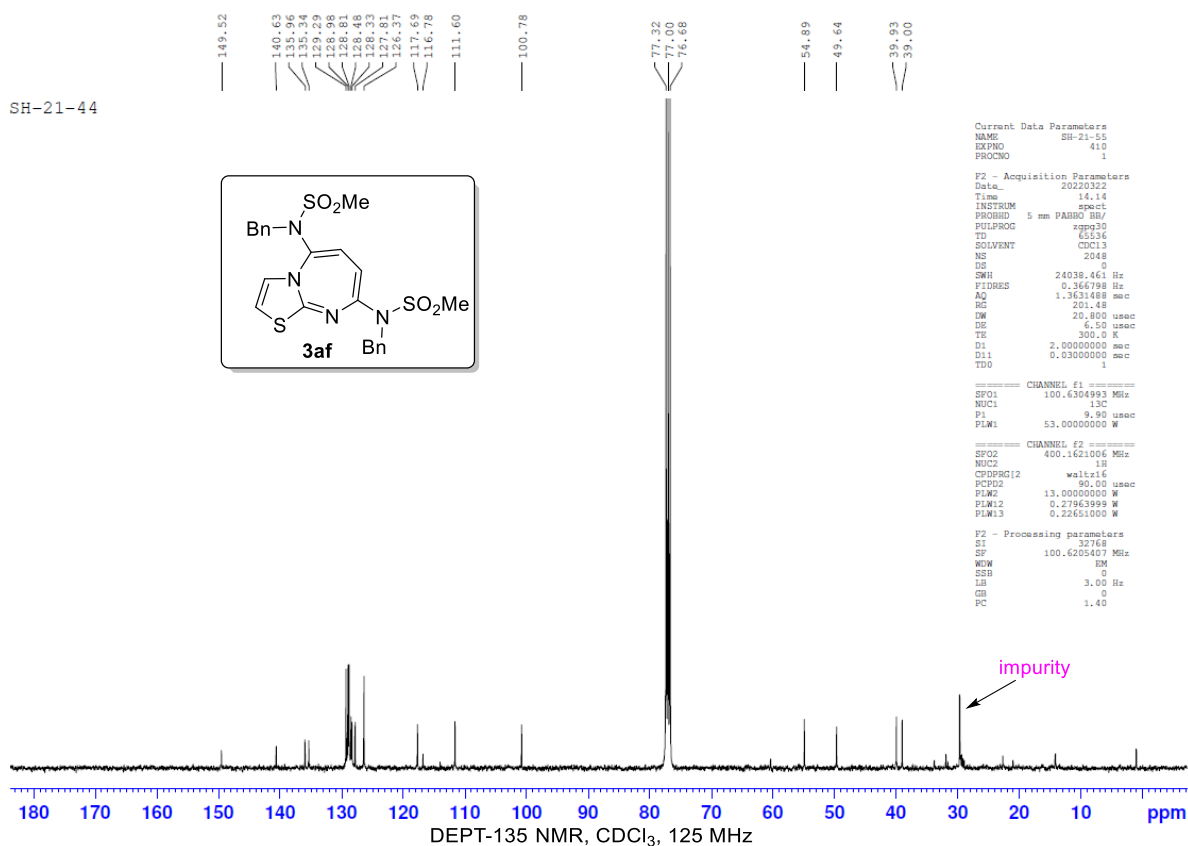

SH-21-55A

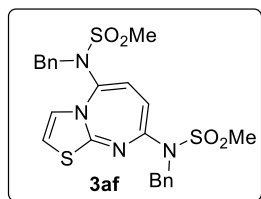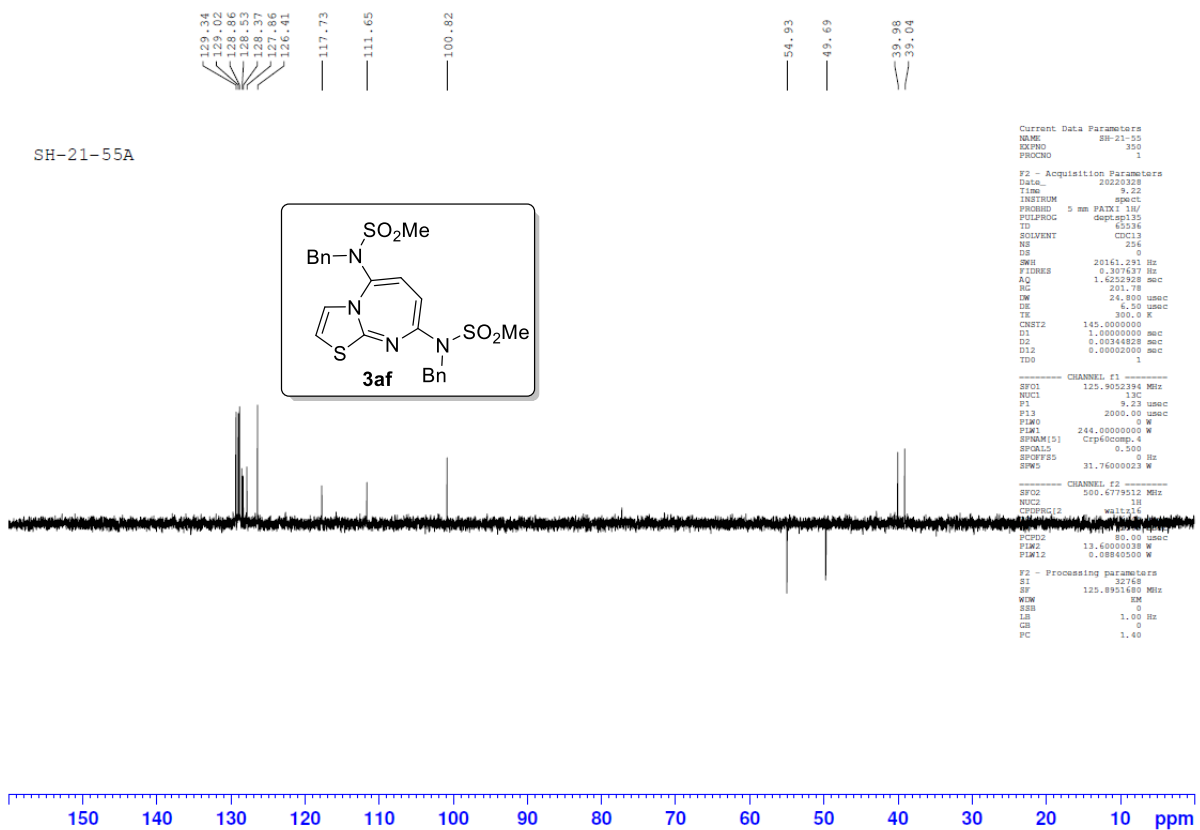



SH-21-55

COSY NMR, CDCl<sub>3</sub>, 400 MHz

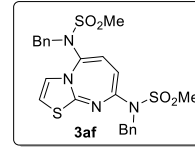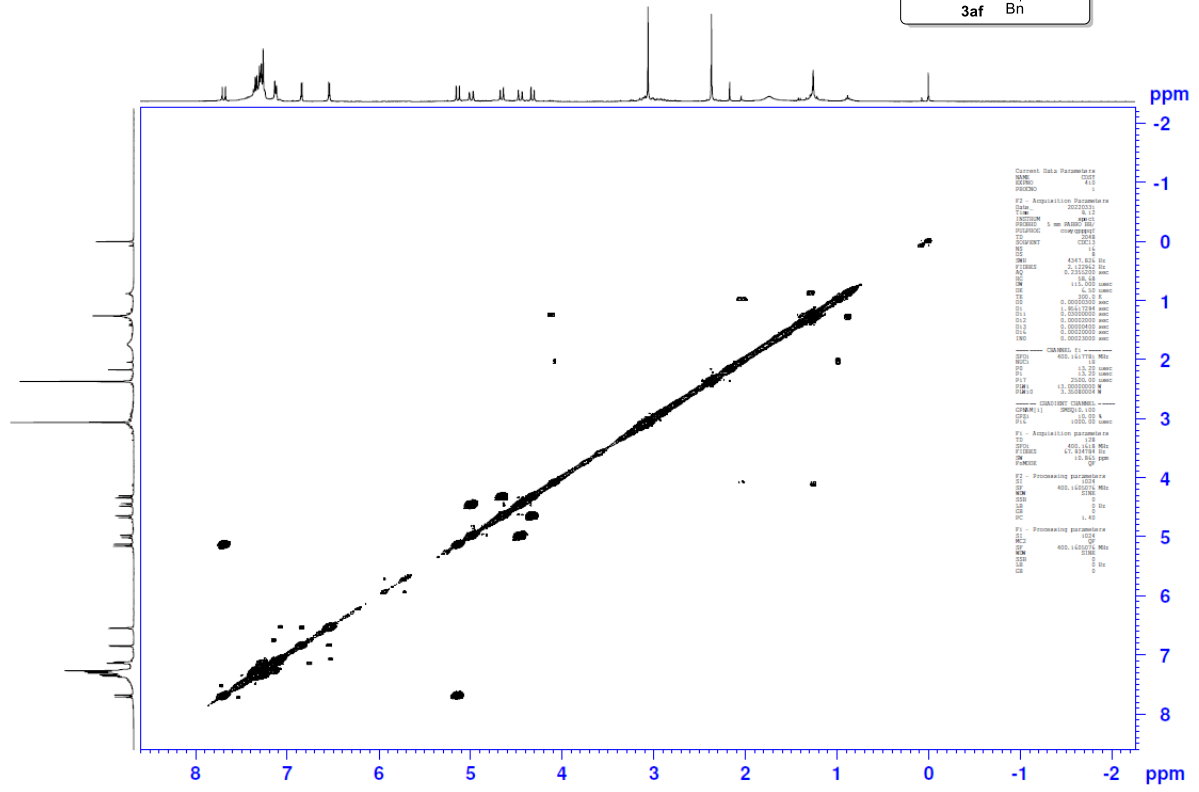

SH-21-55A

NOESY NMR, CDCl<sub>3</sub>, 500 MHz

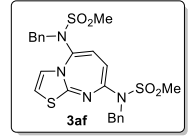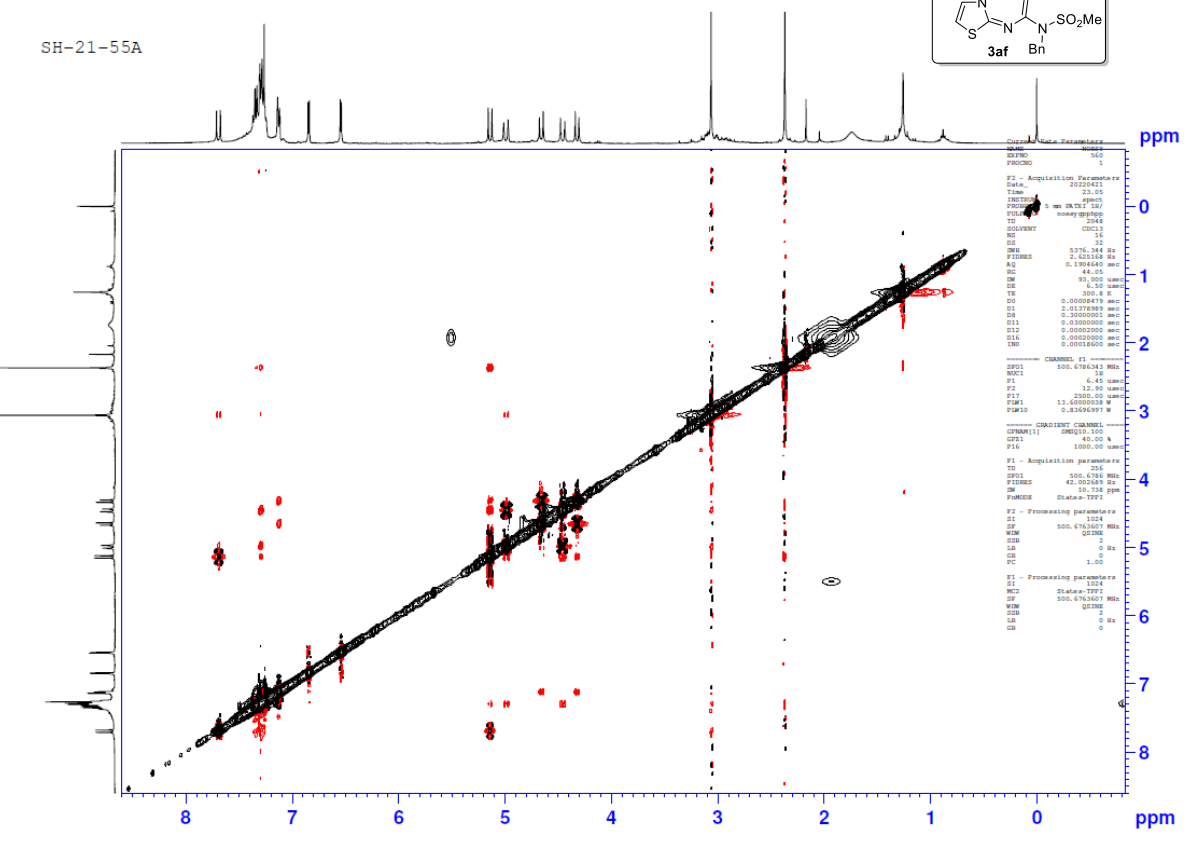

SH-21-55A

HSQC NMR, CDCl<sub>3</sub>, 101 MHz

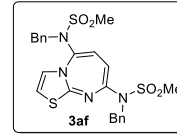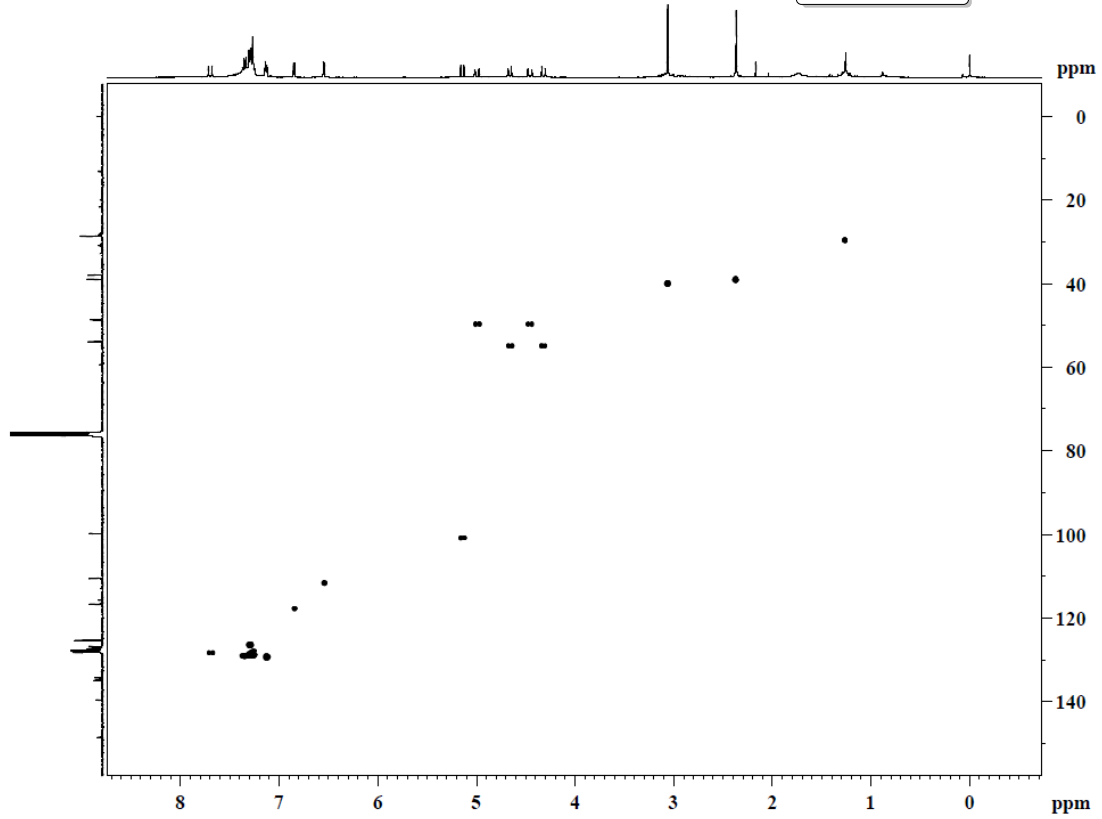

| Sample Name   | GR-22-13         | Position    | Vial 29     | Instrument Name | Instrument 1 | User Name              |                       |
|---------------|------------------|-------------|-------------|-----------------|--------------|------------------------|-----------------------|
| Inj Vol       | 1                | InjPosition |             | SampleType      | Sample       | IRM Calibration Status | Some Ions Missed      |
| Data Filename | HRMS22I24MAR29.d | ACQ Method  | ISOCRATIC.m | Comment         |              | Acquired Time          | 3/24/2022 12:51:13 PM |

+ Scan: 1 (0.5 min) HRMS22I24MAR29.d Subtract

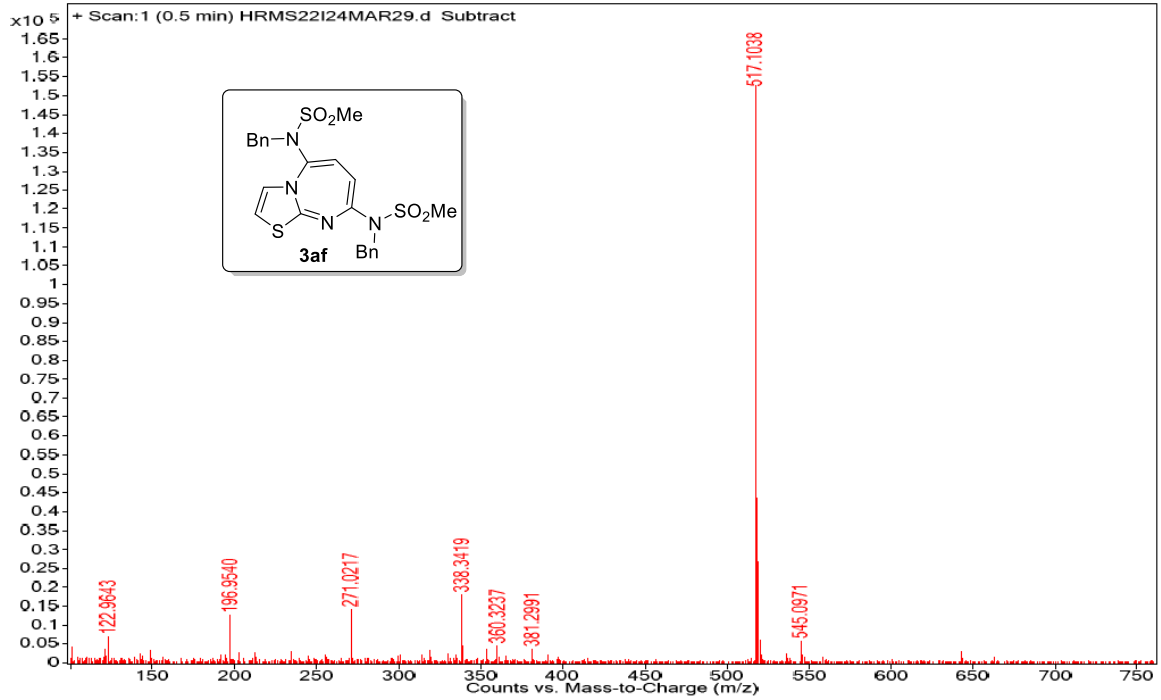

<sup>1</sup>H NMR, CDCl<sub>3</sub>, 400 MHz

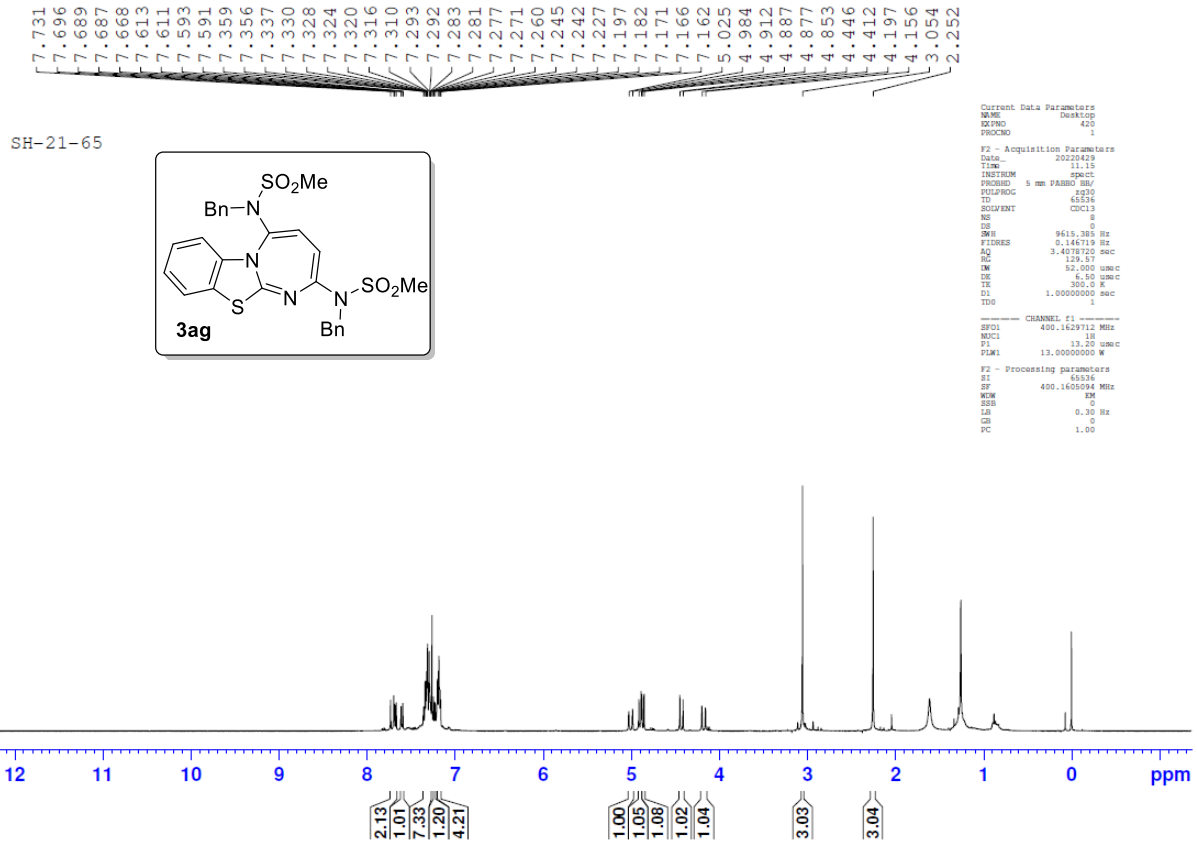

<sup>13</sup>C NMR, CDCl<sub>3</sub>, 101 MHz

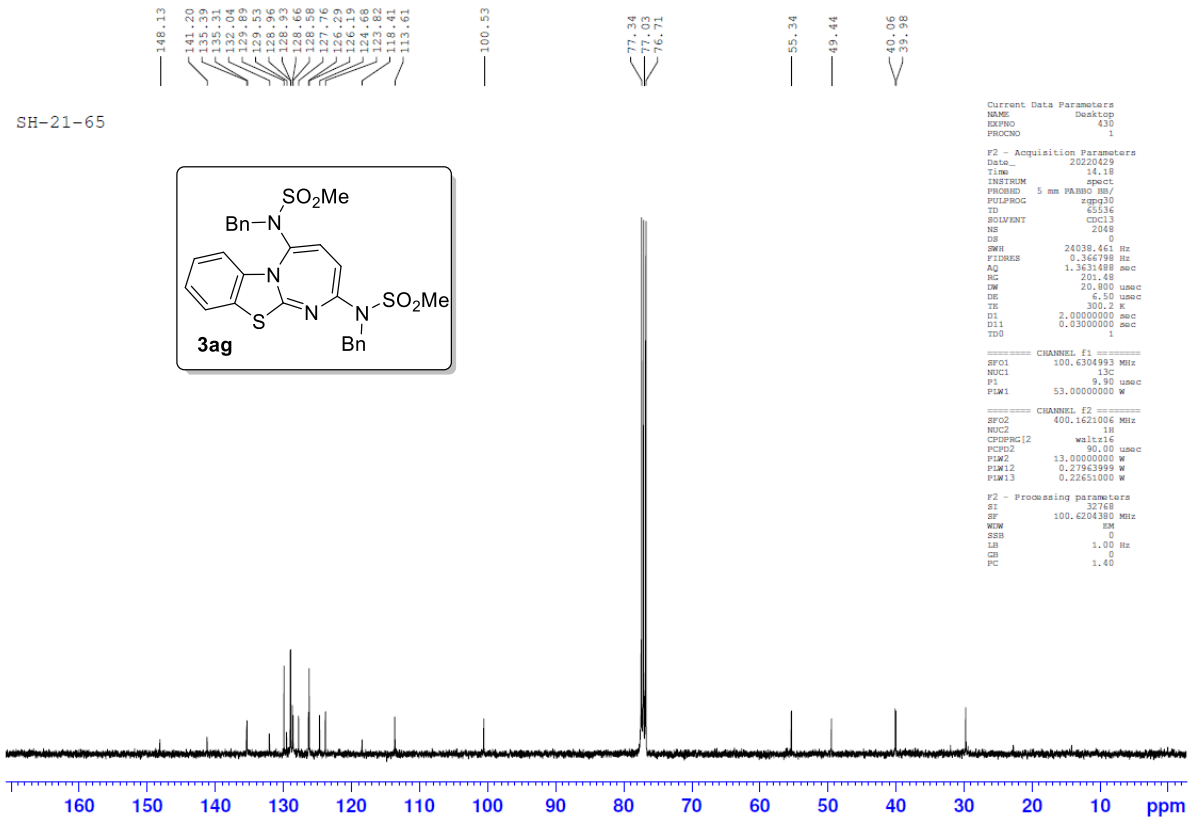

Sample Name SH-21-09 Position Vial 11 Instrument Name Instrument 1 User Name  
 Inj Vol 1 InjPosition SampleType Sample IRM Calibration Status Some Ions Missed  
 Data Filename HRMS22127APR11.d ACQ Method ISOCRATIC.m Comment Acquired Time 4/27/2022 12:09:00 PM

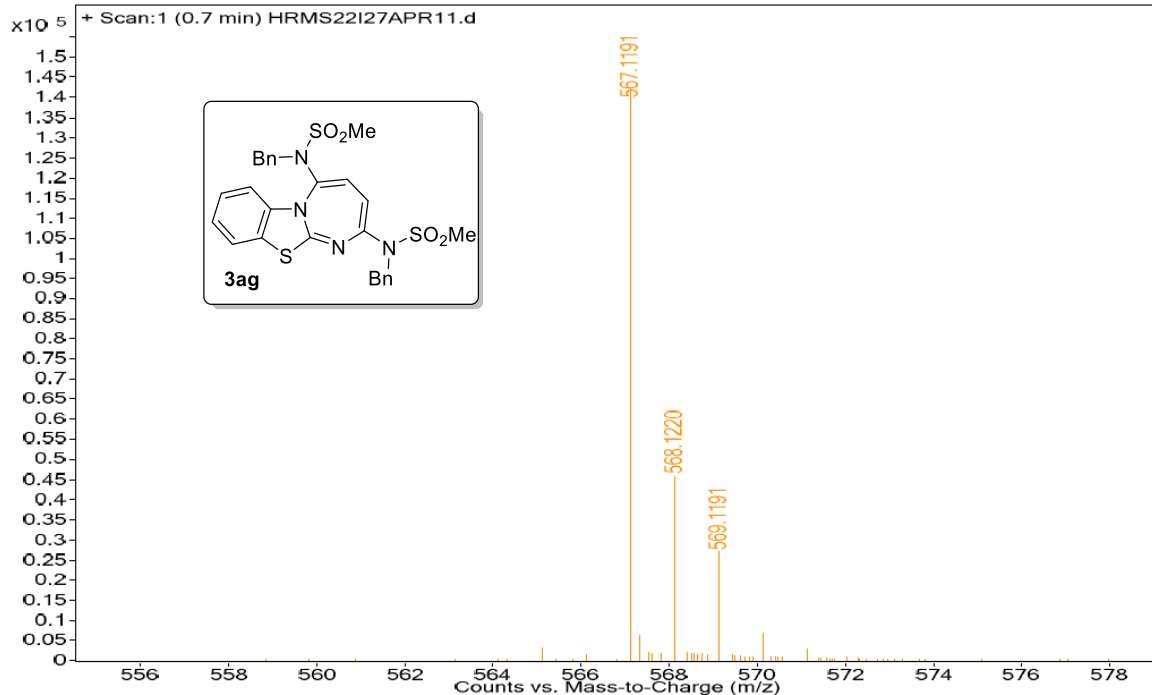

<sup>1</sup>H NMR, CDCl<sub>3</sub>, 400 MHz

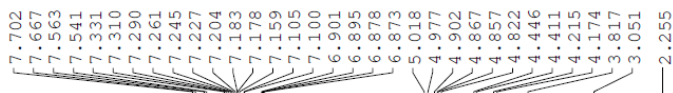

SH-21-58

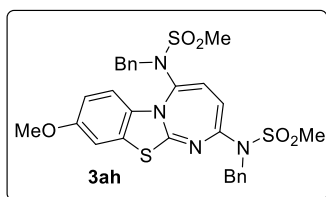

Current Data Parameters  
 NAME SH-21-58  
 EXPRO 330  
 PROCNO 1

F2 - Acquisition Parameters  
 Date\_ 20220418  
 Time 12.20  
 INSTRUM spect  
 PROBD 5 mm PARBO BB/  
 PULPROG zg30  
 TD 65536  
 SOLVENT CDCl3  
 NS 8  
 DS 0  
 SWH 9615.385 Hz  
 FIDRES 0.146719 Hz  
 AQ 3.4078720 sec  
 RG 145.29  
 DW 52.000 usec  
 DE 6.50 usec  
 TE 300.0 K  
 D1 1.00000000 sec  
 TDO 1

----- CHANNEL f1 -----  
 SFO1 400.1629712 MHz  
 NUC1 1H  
 P1 13.20 usec  
 PLW1 13.00000000 W

F2 - Processing parameters  
 SI 65536  
 SF 400.1605091 MHz  
 WDW EM  
 SSB 0  
 LB 0.30 Hz  
 GB 0  
 PC 1.00

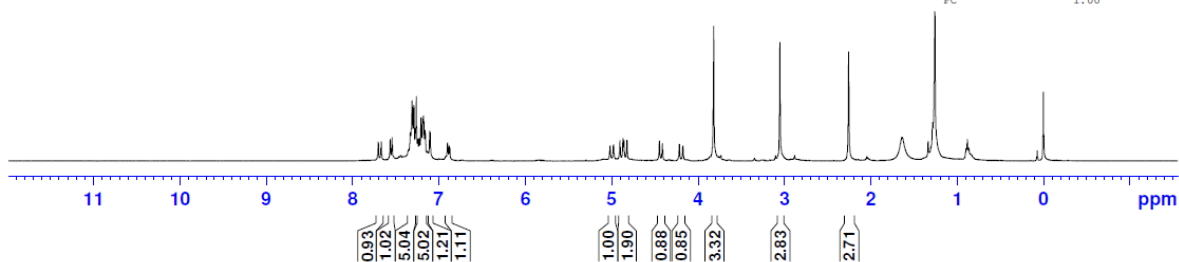

<sup>13</sup>C NMR, CDCl<sub>3</sub>, 101 MHz

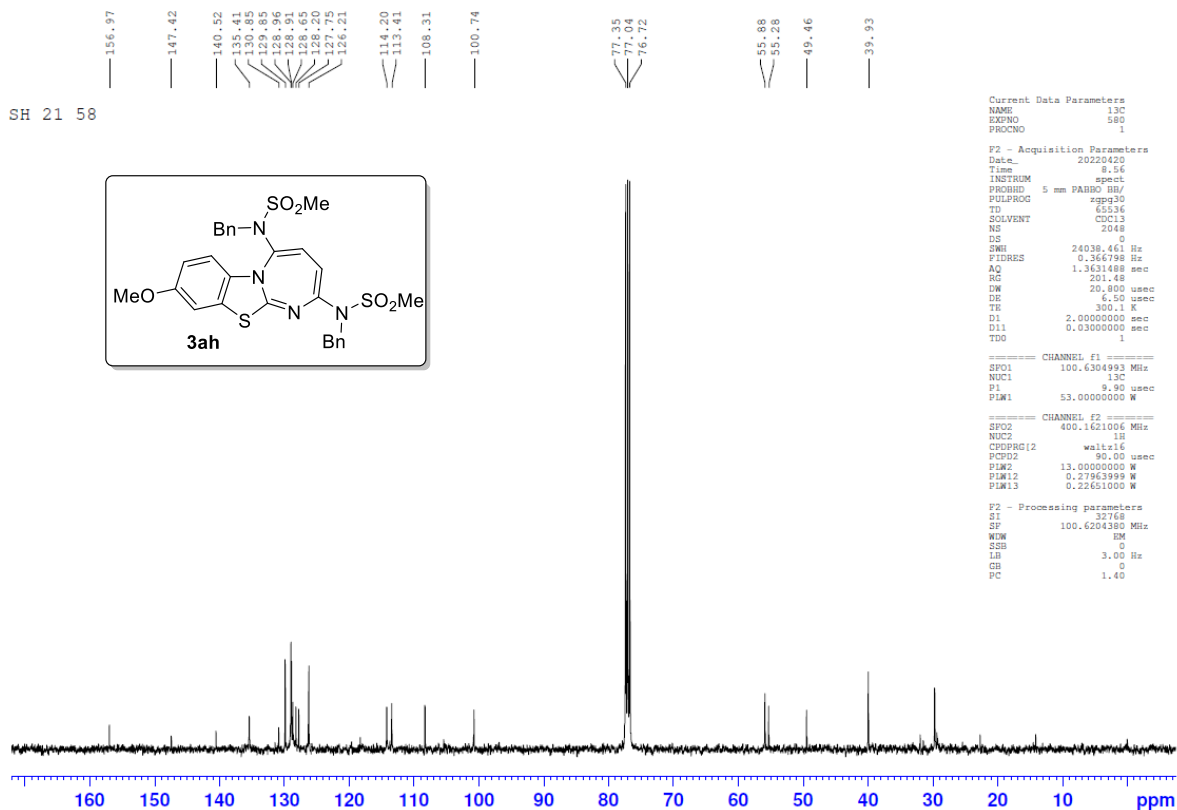

| Sample Name   | SH-22-18         | Position    | Vial 30     | Instrument Name | Instrument 1 | User Name              |                       |
|---------------|------------------|-------------|-------------|-----------------|--------------|------------------------|-----------------------|
| Inj Vol       | 1                | InjPosition |             | SampleType      | Sample       | IRM Calibration Status | Some Ions Missed      |
| Data Filename | HRMS22I25MAR30.d | ACQ Method  | ISOCRATIC.m | Comment         |              | Acquired Time          | 3/25/2022 12:51:19 PM |

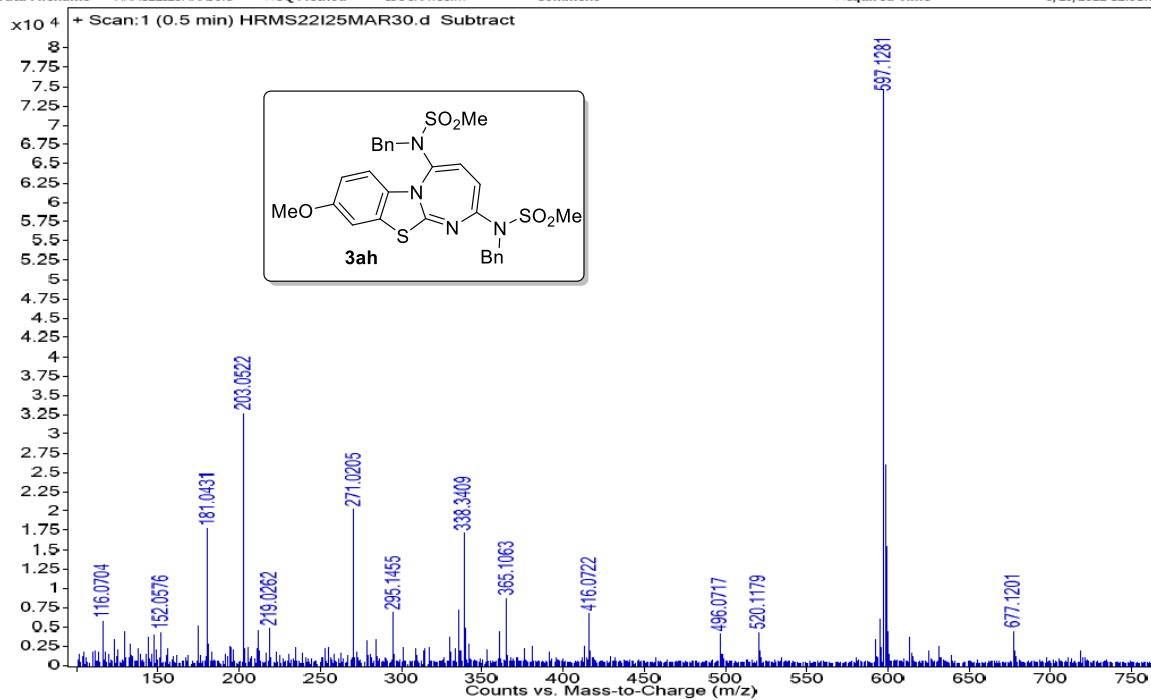

<sup>1</sup>H NMR, CDCl<sub>3</sub>, 400 MHz

SH 21 61

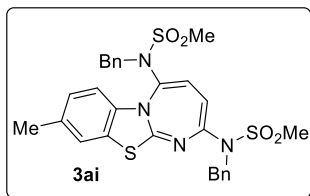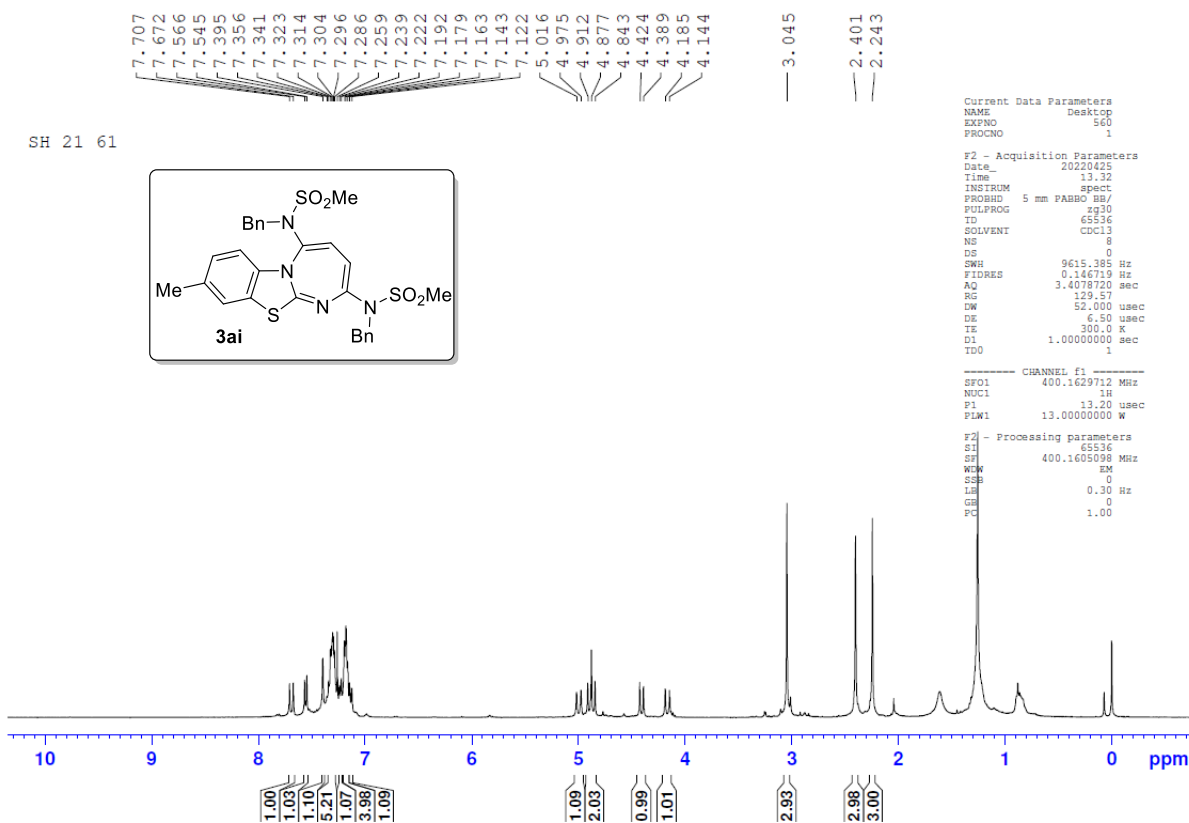

<sup>13</sup>C NMR, CDCl<sub>3</sub>, 125 MHz

sh-21-61

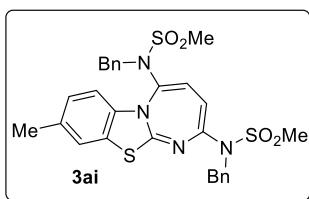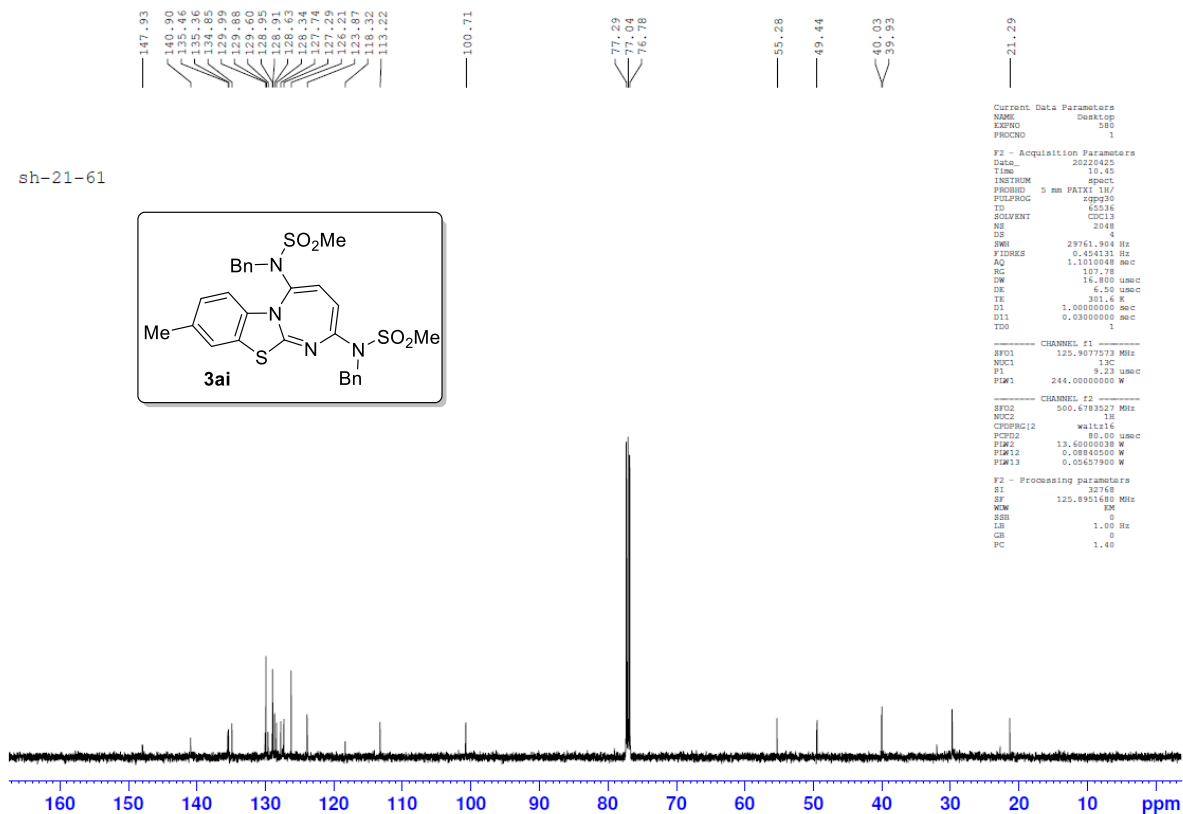

Sample Name GR-22-22 Position Vial 22 Instrument Name Instrument 1 User Name  
 Inj Vol 1 InjPosition Instrument 1 Sample IRM Calibration Status Some Ions Missed  
 Data Filename HRMS22I25APR22.d ACQ Method ISOCRATIC.m Comment Acquired Time 4/25/2022 1:24:22 PM

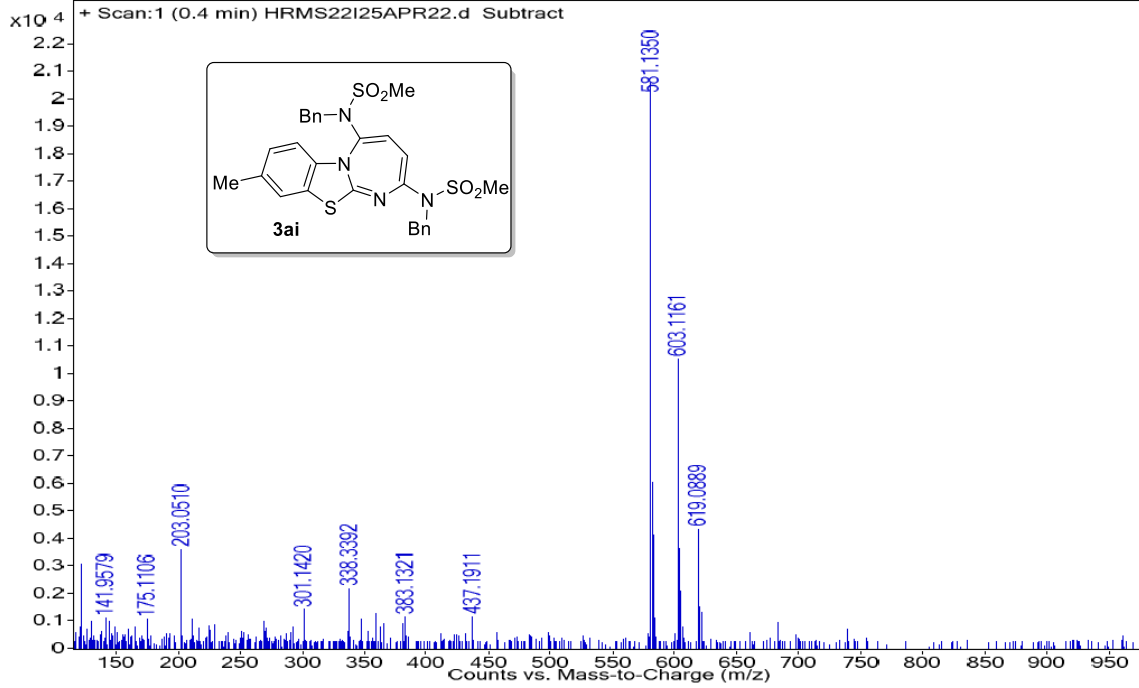

<sup>1</sup>H NMR, CDCl<sub>3</sub>, 400 MHz

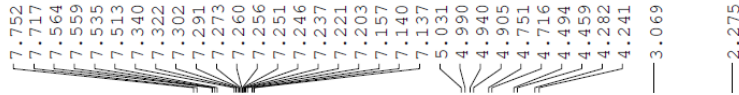

SH-21-63

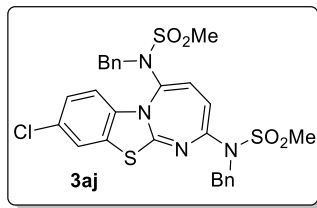

Current Data Parameters  
 NAME Desktop  
 EXPNO 400  
 PROCNO 1  
 F2 - Acquisition Parameters  
 Date\_ 20220429  
 Time 11.10  
 INSTRUM spect  
 PROBHD 5 mm PABBO BB/  
 PULPROG zg30  
 ID 65536  
 SOLVENT CDCl3  
 NS 8  
 DS 0  
 SWH 9615.385 Hz  
 FIDRES 0.146719 Hz  
 AQ 3.4078723 sec  
 RG 129.57  
 LW 52.000 usec  
 SE 6.50 usec  
 TE 300.0 K  
 D1 1.00000000 sec  
 TD 1

----- CHANNEL f1 -----  
 SFO1 400.1629712 MHz  
 NUC1 1H  
 P1 13.20 usec  
 PLW1 13.00000000 W  
 F2 - Processing parameters  
 SI 65536  
 SF 400.1605093 MHz  
 WDW EM  
 SSB 0  
 LB 0.30 Hz  
 GB 0  
 PC 1.00

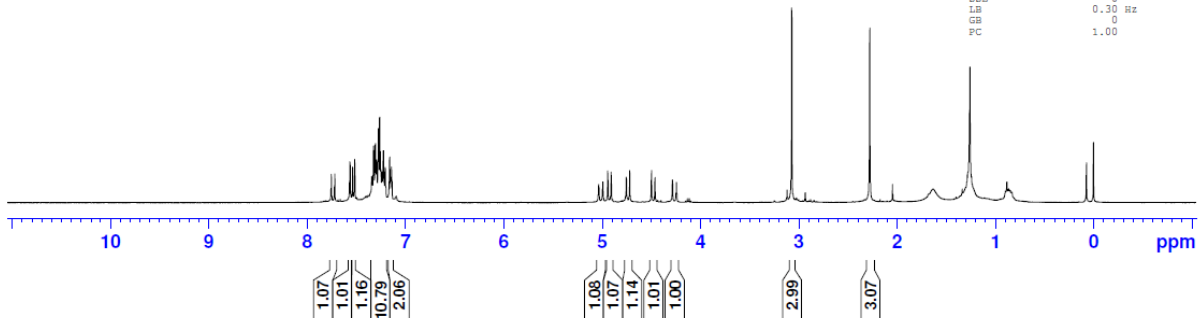

<sup>13</sup>C NMR, CDCl<sub>3</sub>, 125 MHz

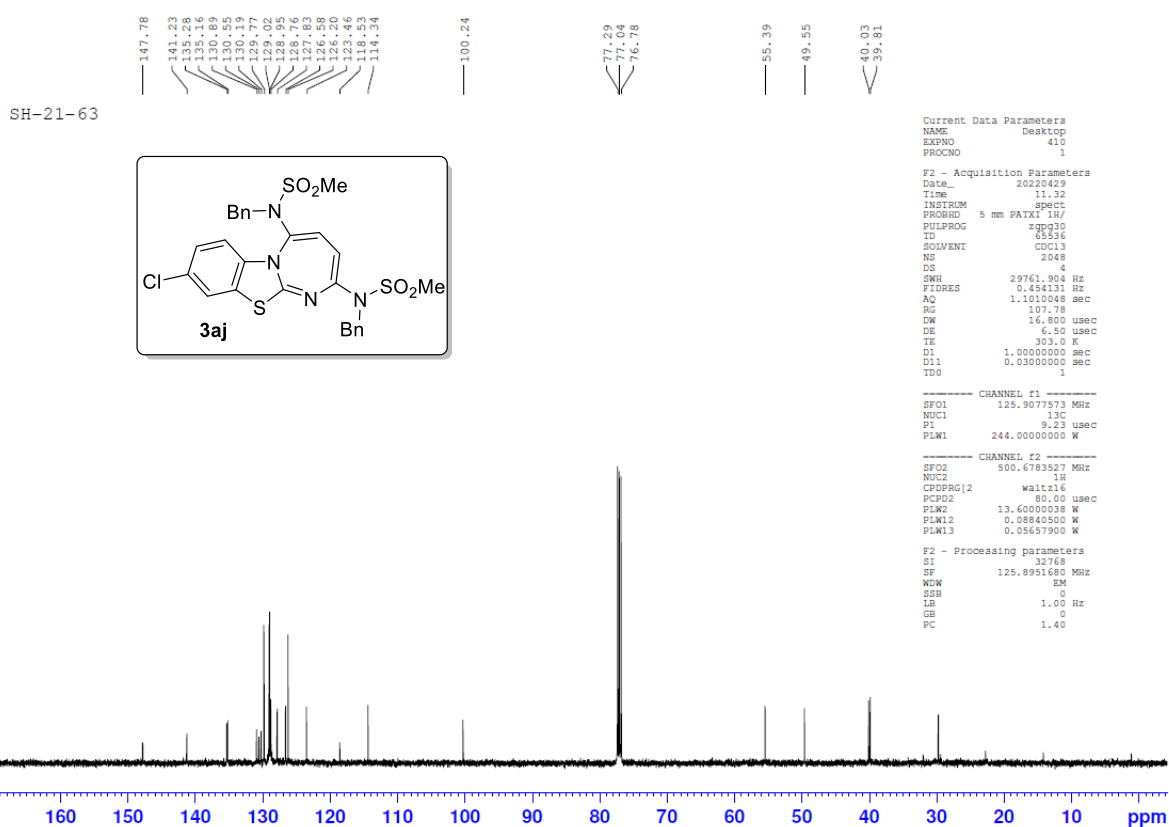

|               |                  |             |             |                 |              |                        |                       |
|---------------|------------------|-------------|-------------|-----------------|--------------|------------------------|-----------------------|
| Sample Name   | SH-22-18         | Position    | Vial 10     | Instrument Name | Instrument 1 | User Name              |                       |
| Inj Vol       | 1                | InjPosition |             | SampleType      | Sample       | IRM Calibration Status | Some Ions Missed      |
| Data Filename | HRMS22127APR10.d | ACQ Method  | ISOCRATIC.m | Comment         |              | Acquired Time          | 4/27/2022 12:05:24 PM |

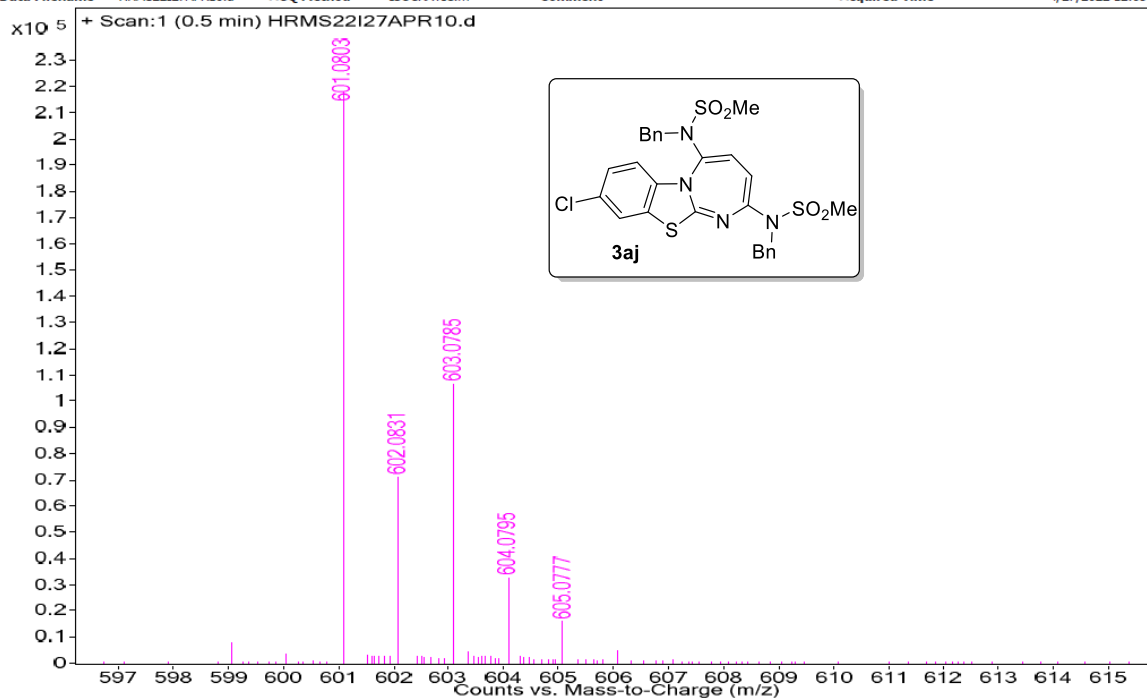



<sup>1</sup>H NMR, CDCl<sub>3</sub>, 400 MHz

7.673  
7.638  
7.506  
7.495  
7.484  
7.473  
7.327  
7.307  
7.288  
7.270  
7.252  
7.247  
7.239  
7.233  
7.228  
7.201  
7.190  
7.167  
7.152  
7.134  
7.091  
7.075  
7.015  
6.976  
6.969  
6.954  
6.947  
6.932  
6.925  
6.925  
4.961  
4.920  
4.871  
4.836  
4.692  
4.657  
4.426  
4.391  
4.206  
4.165  
2.998  
2.206

SH-21-64

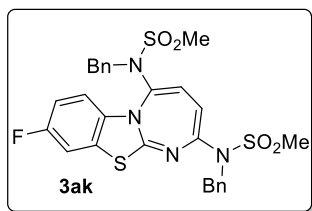

Current Data Parameters  
NAME: 420  
EXPNO: 1  
PROCNO: 1  
F2 - Acquisition Parameters  
Date\_: 20220426  
Time: 11:27  
INSTRUM: spect  
PROBHD: 5 mm PABBO BBO/  
PULPROG: zg30  
TD: 65536  
SOLVENT: CDCl3  
NS: 0  
DS: 0  
SWH: 9615.385 Hz  
FIDRES: 0.146719 Hz  
AQ: 3.4078720 sec  
RG: 148.29  
SW: 92.000 usec  
DE: 6.50 usec  
TE: 300.2 K  
D1: 1.00000000 sec  
D10: 1.00000000 sec  
----- CHANNEL f1 -----  
SFO1: 400.1629712 MHz  
NUC1: 13C  
P1: 13.20 usec  
PL1: 13.00000000 W  
F2 - Processing parameters  
SI: 5536  
SF: 400.1603375 MHz  
WDW: EM  
SSB: 0  
LB: 0.30 Hz  
GB: 0  
PC: 1.00

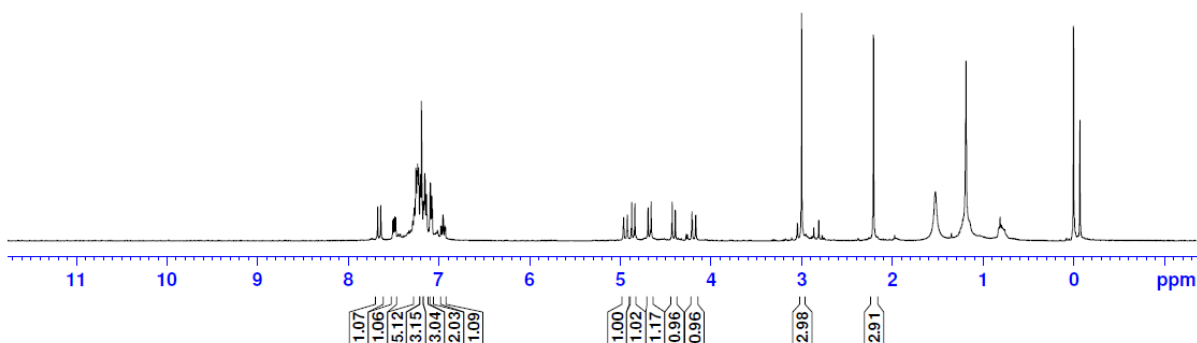

<sup>13</sup>C NMR, CDCl<sub>3</sub>, 125 MHz

SH-21-64

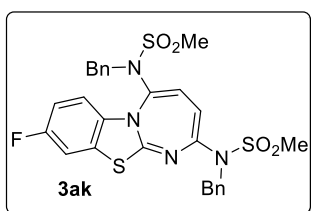

Current Data Parameters  
NAME: 490  
EXPNO: 1  
PROCNO: 1  
F2 - Acquisition Parameters  
Date\_: 20220808  
Time: 10:27  
INSTRUM: spect  
PROBHD: 5 mm PABBO BBO/  
PULPROG: zgpg30  
TD: 65536  
SOLVENT: CDCl3  
NS: 2048  
DS: 0  
SWH: 29761.904 Hz  
FIDRES: 0.454131 Hz  
AQ: 1.1010048 sec  
RG: 99.13  
SW: 16.800 usec  
DE: 6.50 usec  
TE: 303.0 K  
D1: 1.00000000 sec  
D11: 0.03000000 sec  
D10: 0.03000000 sec  
----- CHANNEL f1 -----  
SFO1: 125.9077573 MHz  
NUC1: 13C  
P1: 9.23 usec  
PL1: 244.00000000 W  
----- CHANNEL f2 -----  
SFO2: 500.6783527 MHz  
NUC2: 1H  
PCPFGP2: waltz16  
PCPD2: 80.00 usec  
PLM2: 13.60000038 W  
PLM12: 0.08440500 W  
PLM13: 0.05657800 W  
F2 - Processing parameters  
SI: 2768  
SF: 125.8951680 MHz  
WDW: EM  
SSB: 0  
LB: 1.00 Hz  
GB: 0  
PC: 1.40

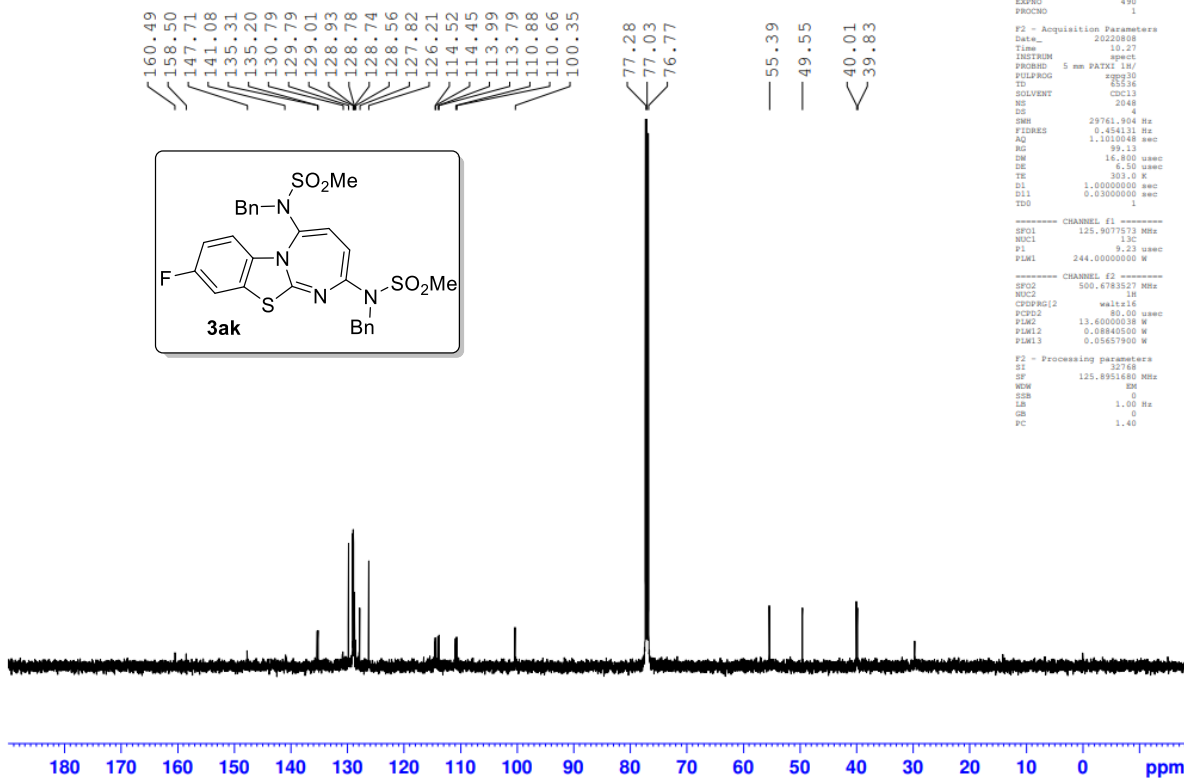

<sup>19</sup>F NMR, CDCl<sub>3</sub>, 376 MHz

SH-21-64

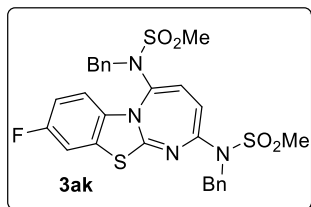

```
Current Data Parameters
NAME      Desktop
EXPNO    430
PROCNO   1

F2 - Acquisition Parameters
Date_    20220426
Time     15.56
INSTRUM  spect
PROBHD   5 mm PABBO BB/
PULPROG  zgpg30m.2
TD       131072
SOLVENT  CDCl3
NS       16
DS       4
SWH      89285.711 Hz
FIDRES   0.681196 Hz
AQ       0.7340032 sec
RG       201.48
DW       5.600 usec
DE       6.50 usec
TE       300.1 K
D1       1.0000000 sec
D11      0.0300000 sec
D12      0.0002000 sec
TD0      1

----- CHANNEL f1 -----
SFO1     376.4894122 MHz
NUC1     19F
P1       15.00 usec
PLM1     21.00000000 W

----- CHANNEL f2 -----
SFO2     400.1621006 MHz
NUC2     1H
CPDPRG2  waltz16
PCPD2    90.00 usec
PLM2     13.00000000 W
PLM12    0.27963999 W

F2 - Processing parameters
SI       65536
SF       376.5270650 MHz
WDW      EM
SSB      0
LB       0.30 Hz
GB       0
PC       1.00
```

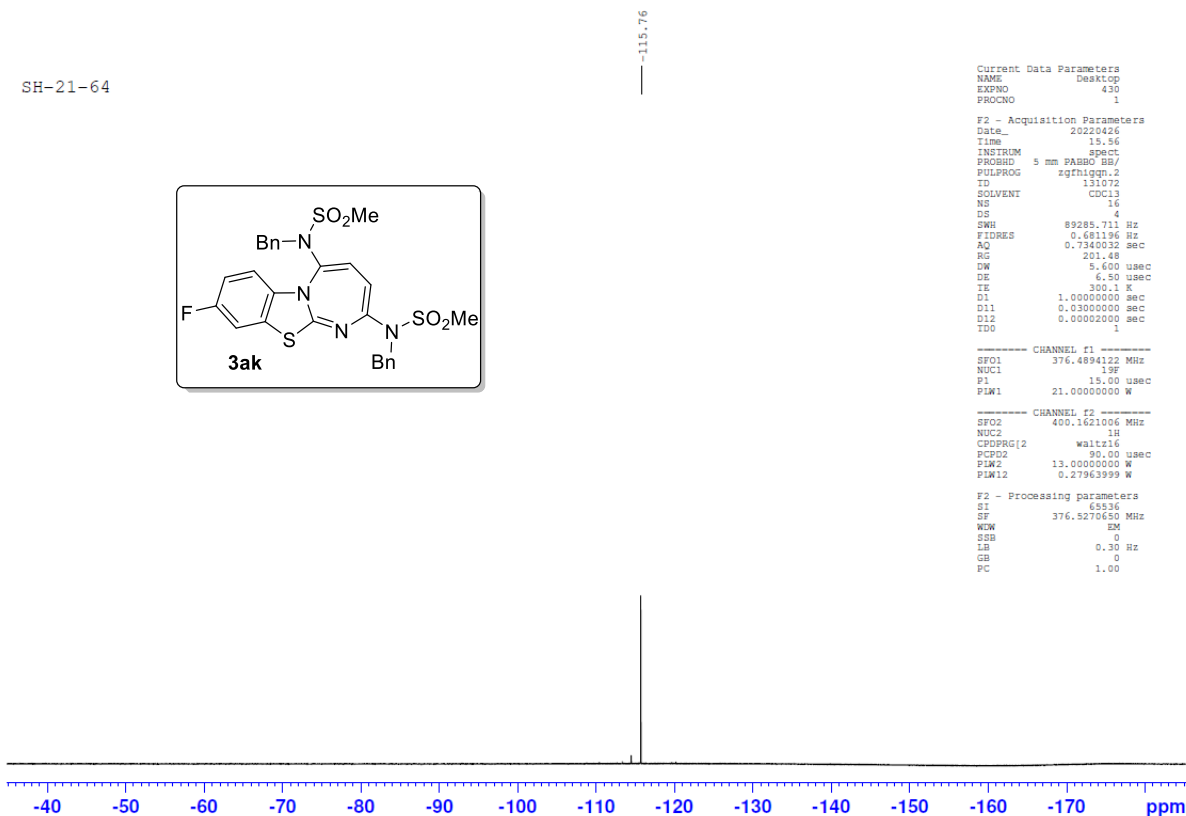

| Sample Name   | GR-22-91         | Position    | Vial 14     | Instrument Name | Instrument 1 | User Name              |                       |
|---------------|------------------|-------------|-------------|-----------------|--------------|------------------------|-----------------------|
| Inj Vol       | 1                | InjPosition |             | SampleType      | Sample       | IRM Calibration Status | Some Ions Missed      |
| Data Filename | HRMS22I26APR14.d | ACQ Method  | ISOCRATIC.m | Comment         |              | Acquired Time          | 4/26/2022 12:03:19 PM |

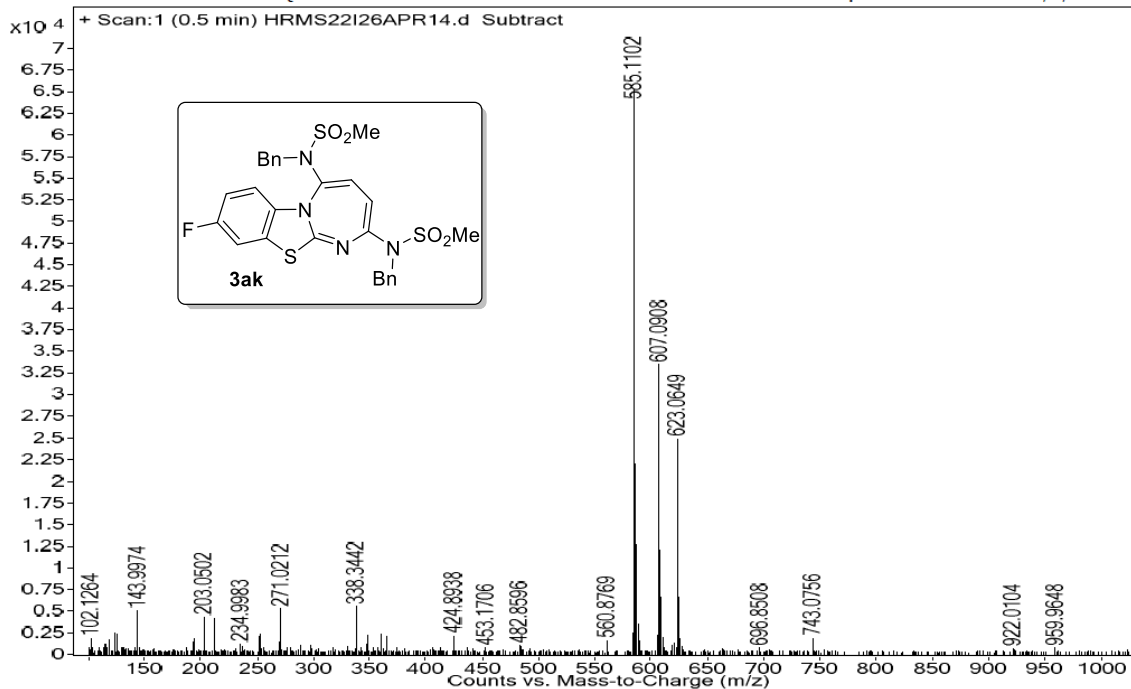

gr-21-61

<sup>1</sup>H NMR, CDCl<sub>3</sub>, 400 MHz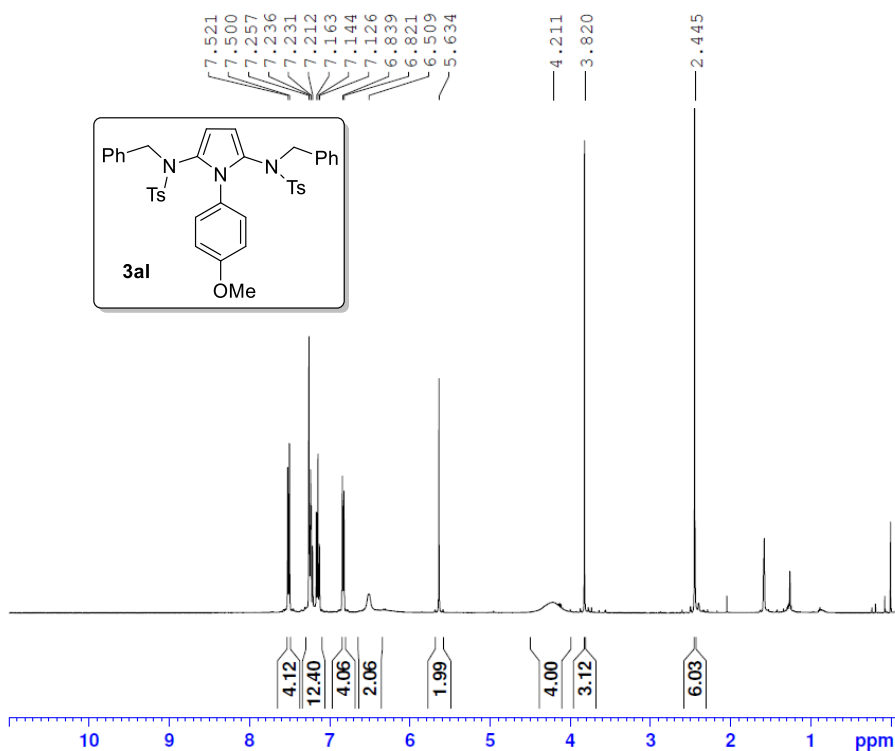

```

Current Data Parameters
NAME      GR-21-61
EXPNO    560
PROCNO   1

F2 - Acquisition Parameters
Date_    20211123
Time     21.11
INSTRUM  spect
PROBHD   5 mm PABBO BB/
PULPROG  zg30
TD       65536
SOLVENT  CDCl3
NS       8
DS       0
SWH      9615.385 Hz
FIDRES   0.146719 Hz
AQ       3.4078720 sec
RG       114.26
DW       52.000 usec
DE       6.50 usec
TE       300.0 K
D1       1.00000000 sec
TD0      1

===== CHANNEL f1 =====
SF01    400.1629712 MHz
NUC1     1H
P1      13.20 usec
PLW1    13.00000000 W

F2 - Processing parameters
SI       65536
SF       400.1605106 MHz
WDW      EM
SSB      0
LB       0.30 Hz
GB       0
PC       1.00

```

Q-IV-01-2

<sup>13</sup>C NMR, CDCl<sub>3</sub>, 101 MHz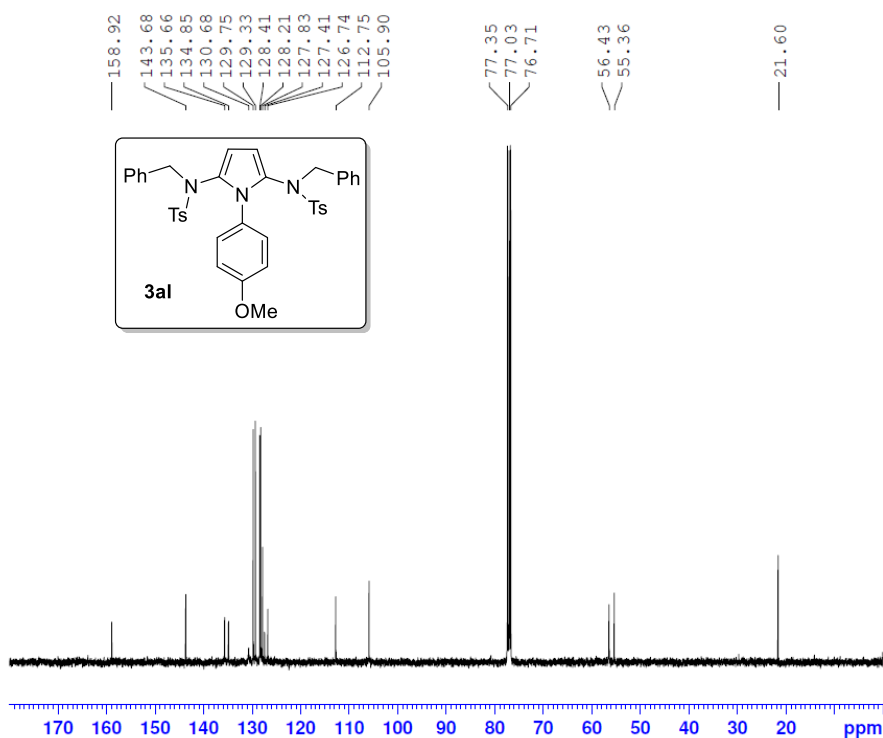

```

Current Data Parameters
NAME      GR-21-61
EXPNO    570
PROCNO   1

F2 - Acquisition Parameters
Date_    20211123
Time     21.46
INSTRUM  spect
PROBHD   5 mm PABBO BB/
PULPROG  zgpg30
TD       65536
SOLVENT  CDCl3
NS       1024
DS       0
SWH      24038.461 Hz
FIDRES   0.366798 Hz
AQ       1.3631488 sec
RG       201.48
DW       20.800 usec
DE       6.50 usec
TE       300.0 K
D1       2.00000000 sec
D11      0.03000000 sec
TD0      1

===== CHANNEL f1 =====
SF01    100.6304993 MHz
NUC1     13C
P1       9.90 usec
PLW1    53.00000000 W

===== CHANNEL f2 =====
SF02    400.1621006 MHz
NUC2     1H
CPDPRG2  waltz16
PCPD2    90.00 usec
PLW2    13.00000000 W
PLW12   0.27963999 W
PLW13   0.22651000 W

F2 - Processing parameters
SI       32768
SF       100.6204380 MHz
WDW      EM
SSB      0
LB       1.00 Hz
GB       0
PC       1.40

```

|               |                |             |             |                 |              |                        |                       |
|---------------|----------------|-------------|-------------|-----------------|--------------|------------------------|-----------------------|
| Sample Name   | HRMS22I20JAN23 | Position    | Vial 23     | Instrument Name | Instrument 1 | User Name              |                       |
| Inj Vol       | 1              | InjPosition |             | SampleType      | Sample       | IRM Calibration Status | Some Ions Missed      |
| Data Filename | SH-20-43.d     | ACQ Method  | ISOCRATIC.m | Comment         |              | Acquired Time          | 1/20/2022 12:31:33 PM |

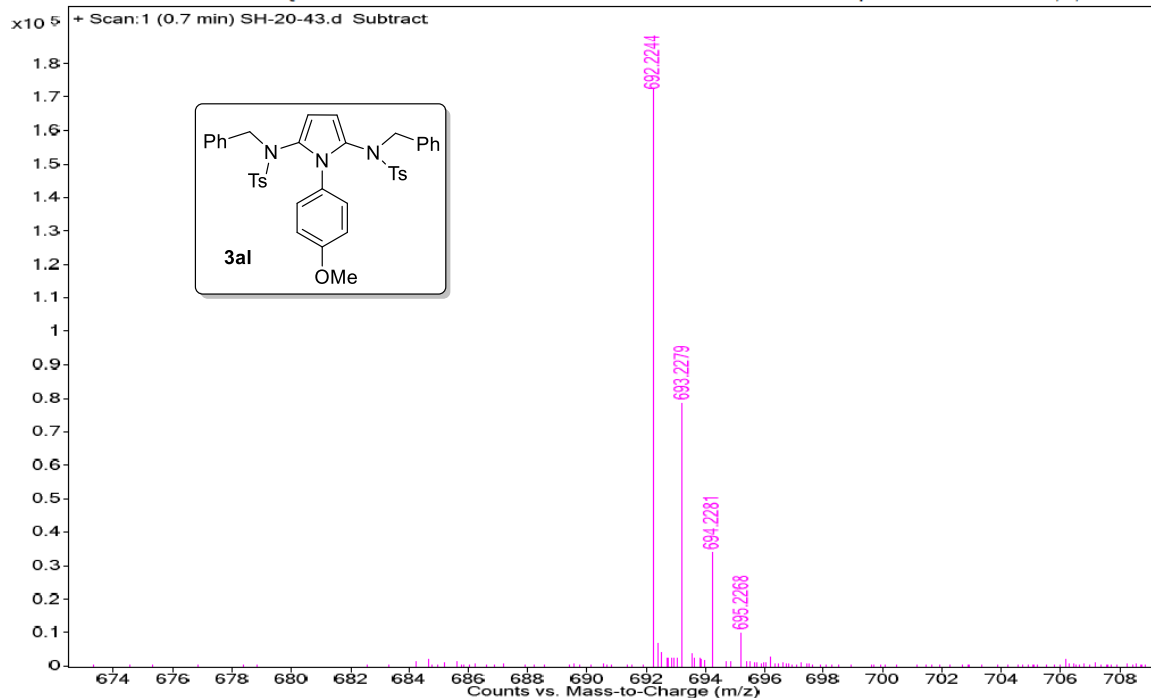

GR-21-58

<sup>1</sup>H NMR, CDCl<sub>3</sub>, 400 MHz

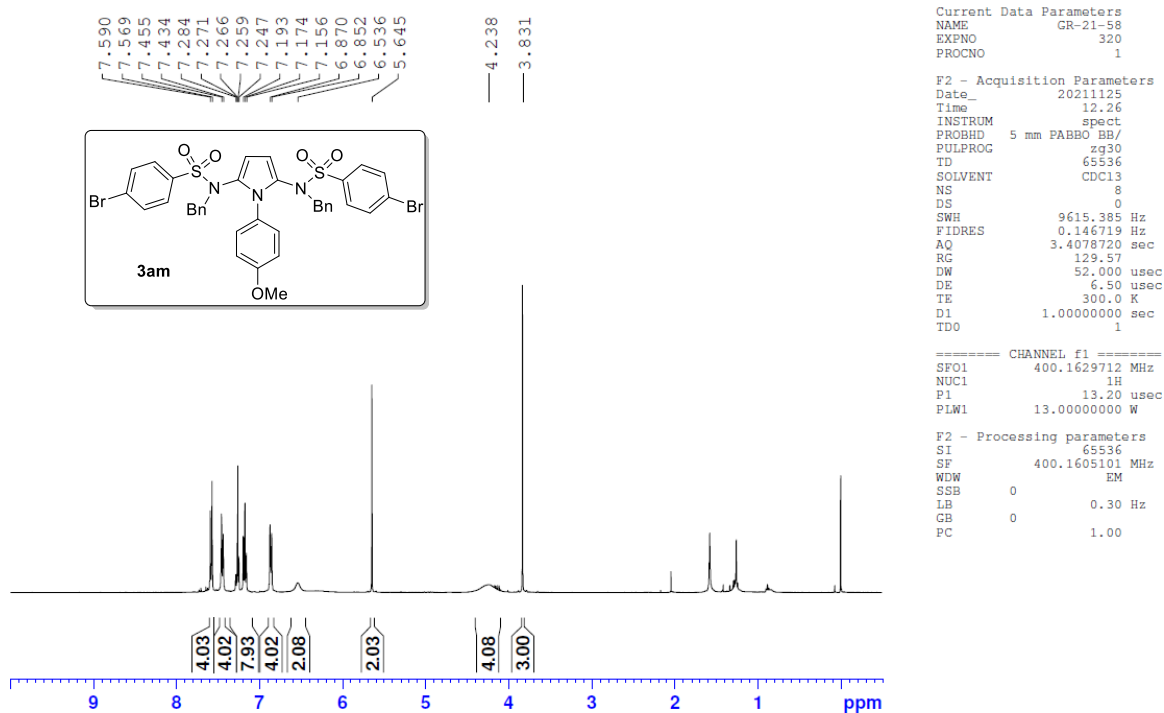

GR-21-58

<sup>13</sup>C NMR, CDCl<sub>3</sub>, 101 MHz

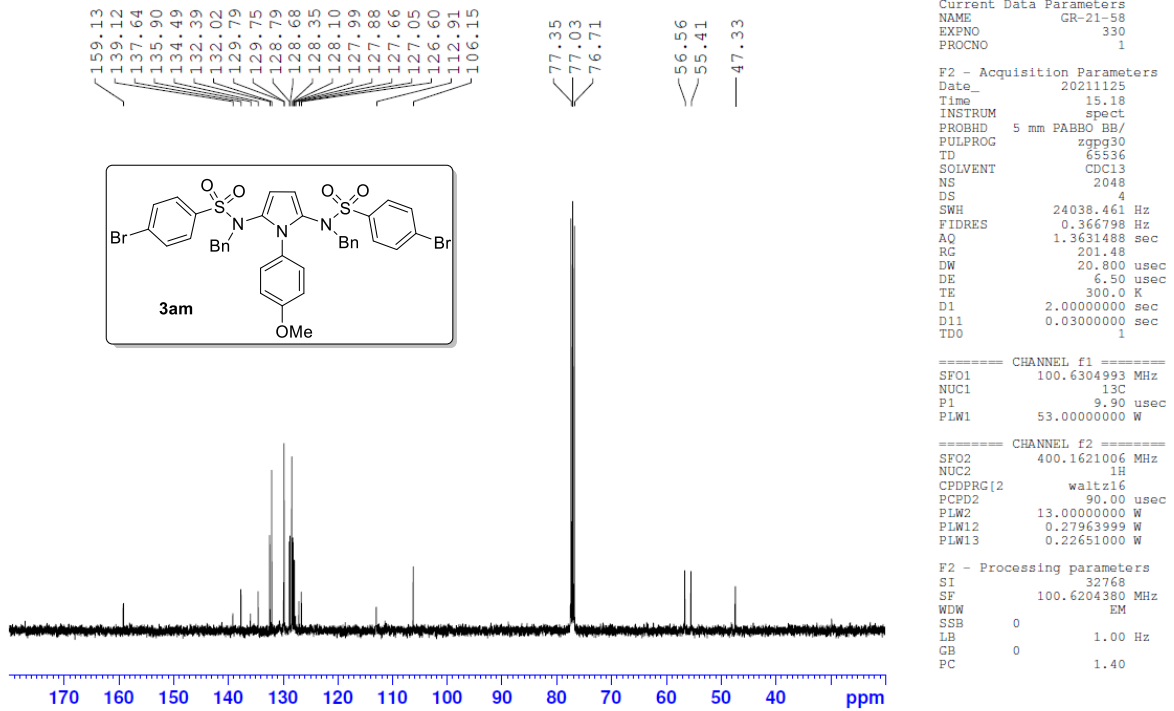

| Sample Name   | HRMS22I21JAN12 | Position    | Vial 12     | Instrument Name | Instrument 1 | User Name              |                       |
|---------------|----------------|-------------|-------------|-----------------|--------------|------------------------|-----------------------|
| Inj Vol       | 1              | InjPosition |             | SampleType      | Sample       | IRM Calibration Status | Some Ions Missed      |
| Data Filename | GR-20-60.d     | ACQ Method  | ISOCRATIC.m | Comment         |              | Acquired Time          | 1/21/2022 11:58:10 AM |

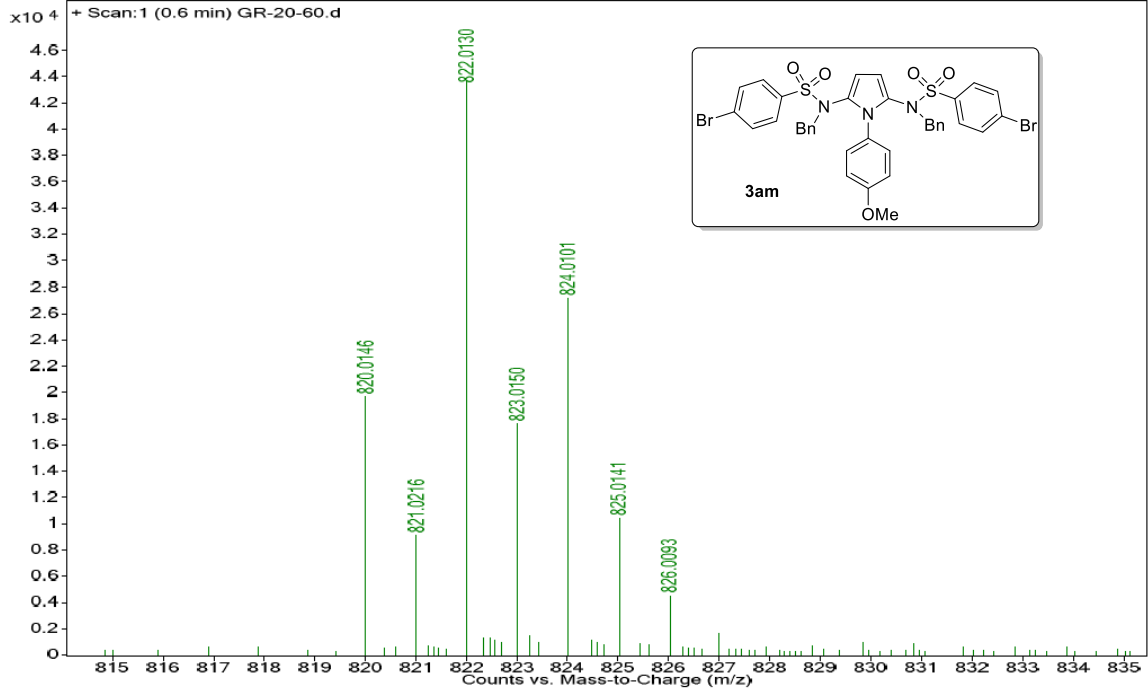

sh 20 59

 $^1\text{H}$  NMR,  $\text{CDCl}_3$ , 400 MHz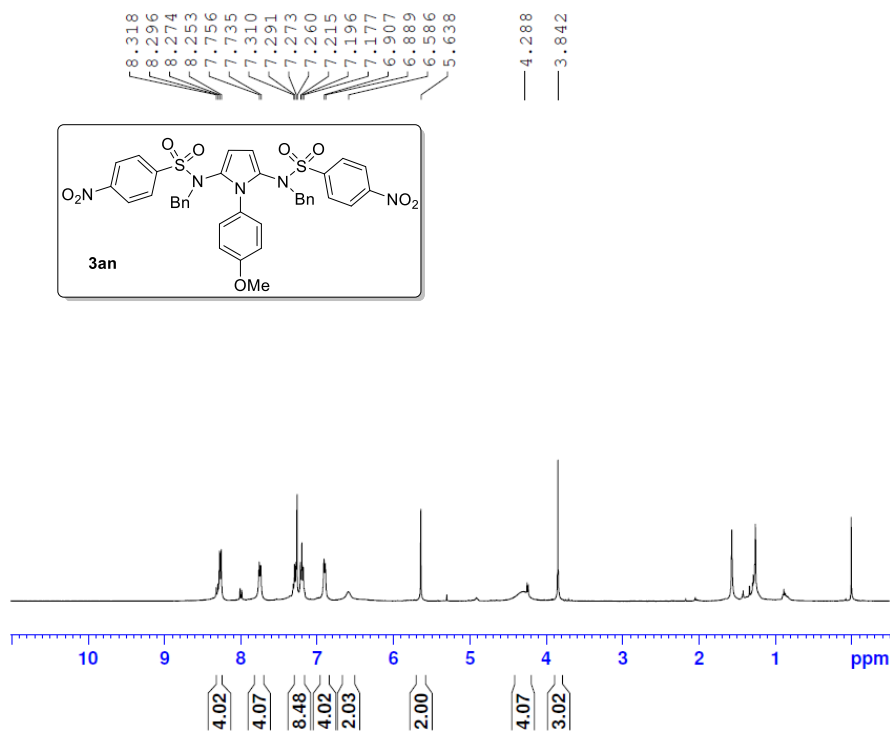

Current Data Parameters  
 NAME GR-21-59  
 EXPNO 540  
 PROCNO 1

F2 - Acquisition Parameters  
 Date\_ 20211208  
 Time 7.39  
 INSTRUM spect  
 PROBHD 5 mm PABBO BB/  
 PULPROG zg30  
 TD 65536  
 SOLVENT  $\text{CDCl}_3$   
 NS 8  
 DS 0  
 SWH 9615.385 Hz  
 FIDRES 0.146719 Hz  
 AQ 3.4078720 sec  
 RG 145.29  
 DW 52.000 usec  
 DE 6.50 usec  
 TE 300.0 K  
 D1 1.00000000 sec  
 TD0 1

===== CHANNEL f1 =====  
 SFO1 400.1629712 MHz  
 NUC1  $^1\text{H}$   
 P1 13.20 usec  
 PLW1 13.00000000 W

F2 - Processing parameters  
 SI 65536  
 SF 400.1605095 MHz  
 WDW EM  
 SSB 0  
 LB 0.30 Hz  
 GB 0  
 PC 1.00

GR-21-59

 $^{13}\text{C}$  NMR,  $\text{CDCl}_3$ , 125 MHz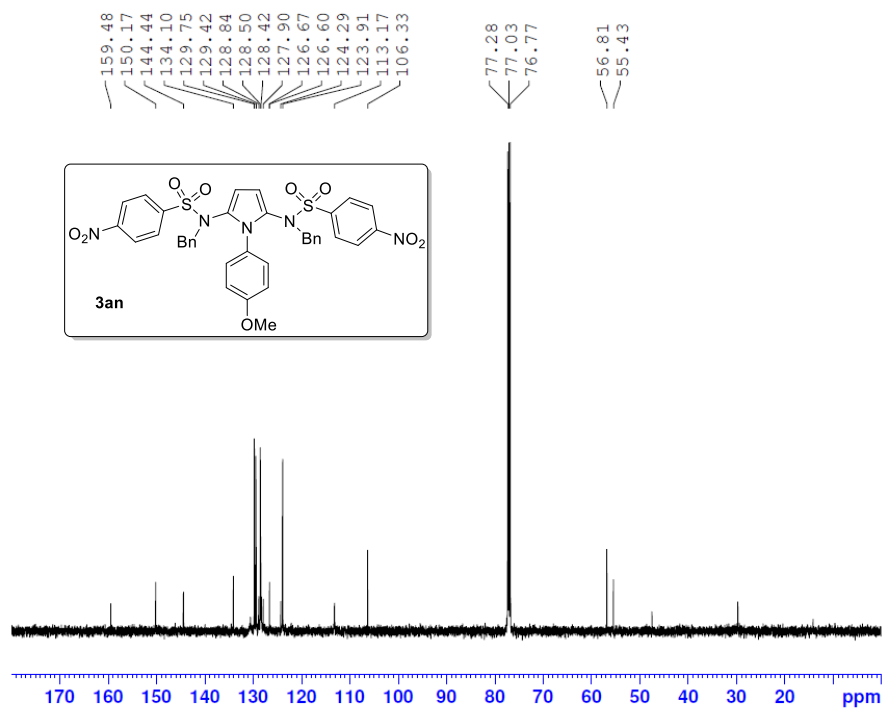

Current Data Parameters  
 NAME GR-21-59  
 EXPNO 550  
 PROCNO 1

F2 - Acquisition Parameters  
 Date\_ 20211207  
 Time 16.34  
 INSTRUM spect  
 PROBHD 5 mm PATXI 1H/  
 PULPROG zgpg30  
 TD 65536  
 SOLVENT  $\text{CDCl}_3$   
 NS 2048  
 DS 4  
 SWH 29761.904 Hz  
 FIDRES 0.454131 Hz  
 AQ 1.1010048 sec  
 RG 56.22  
 DW 16.800 usec  
 DE 6.50 usec  
 TE 303.0 K  
 D1 2.00000000 sec  
 D11 0.03000000 sec  
 TD0 1

===== CHANNEL f1 =====  
 SFO1 125.9077573 MHz  
 NUC1  $^{13}\text{C}$   
 P1 9.23 usec  
 PLW1 244.00000000 W

===== CHANNEL f2 =====  
 SFO2 500.6783527 MHz  
 NUC2  $^1\text{H}$   
 CPDPRG2 waltz16  
 PCPD2 80.00 usec  
 PLW2 13.60000038 W  
 PLW12 0.08840500 W  
 PLW13 0.05657900 W

F2 - Processing parameters  
 SI 32768  
 SF 125.8951680 MHz  
 WDW EM  
 SSB 0  
 LB 1.00 Hz  
 GB 0  
 PC 1.40

Sample Name HRMS22121JAN13 Position Vial 13 Instrument Name Instrument 1 User Name  
 Inj Vol 1 InjPosition InjPosition Instrument 1 Sample IRM Calibration Status Some Ions Missed  
 Data Filename SH-20-62.d ACQ Method ISOCRATIC.m Comment Acquired Time 1/21/2022 12:01:17 PM

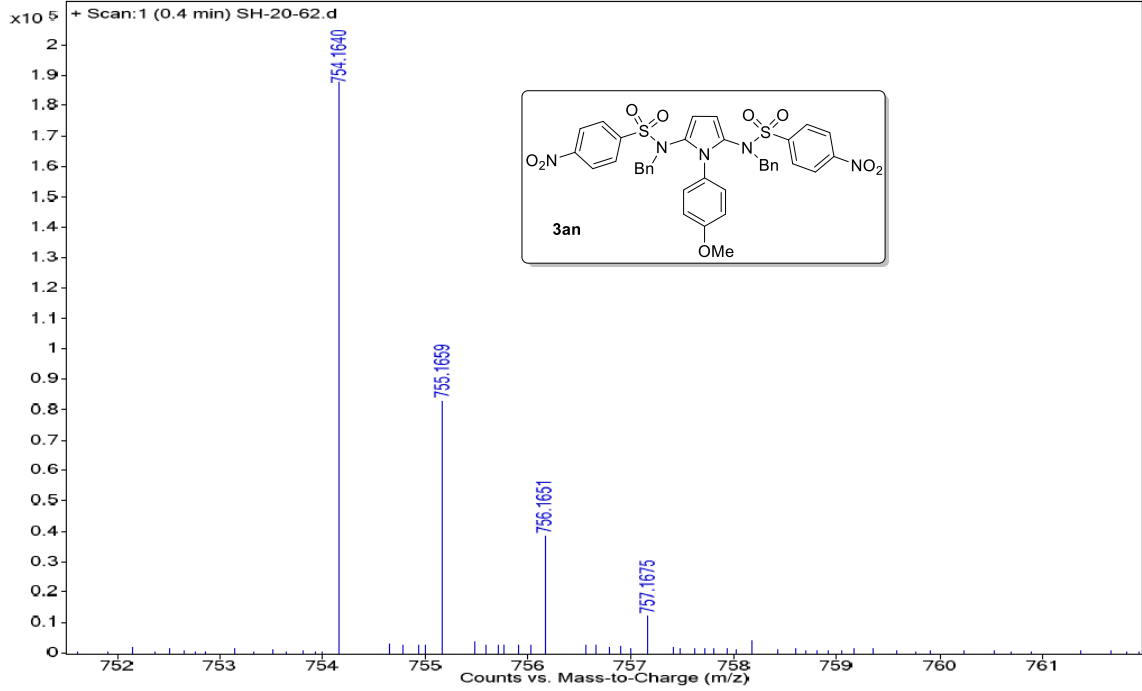

<sup>1</sup>H NMR, CDCl<sub>3</sub>, 400 MHz

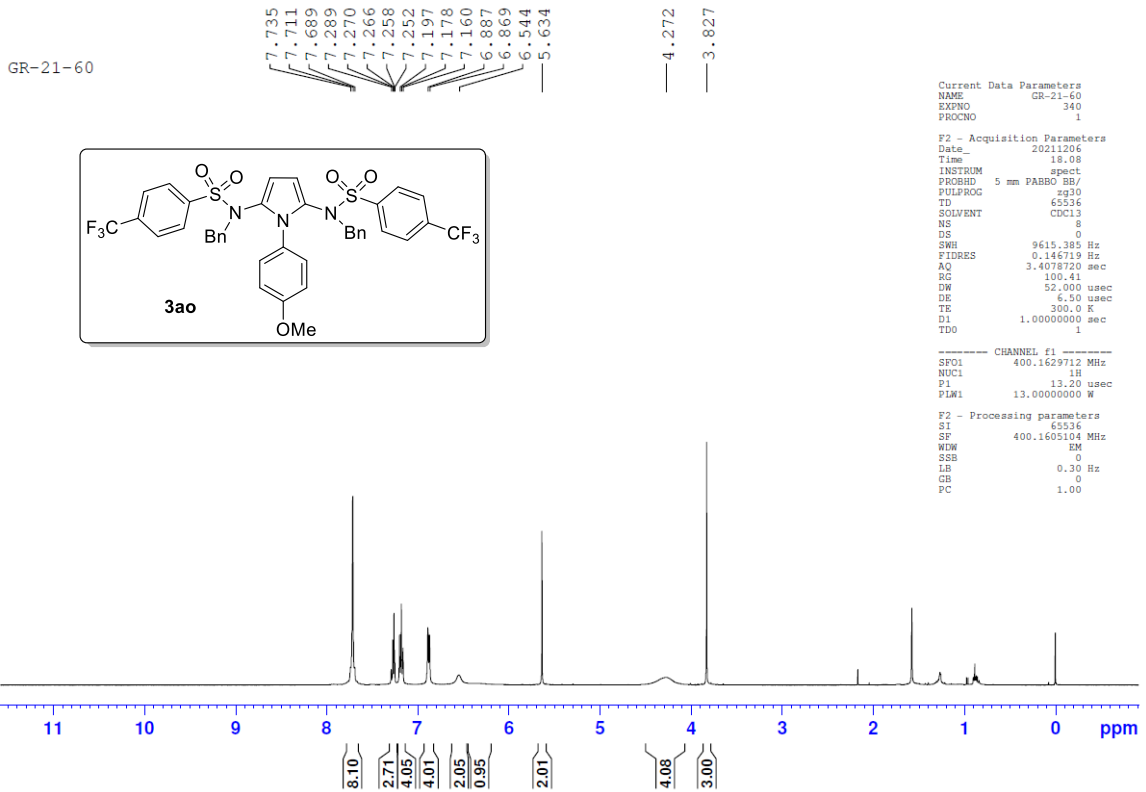

<sup>13</sup>C NMR, CDCl<sub>3</sub>, 125 MHz

GR 21 60

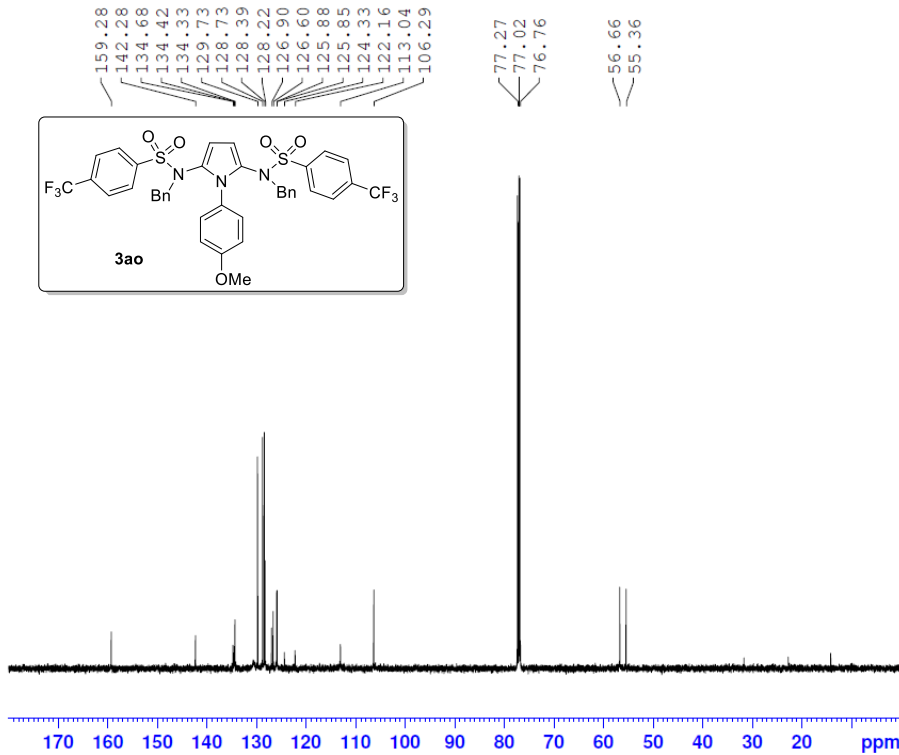

```
Current Data Parameters
NAME GR-21-60
EXPNO 370
PROCNO 1

F2 - Acquisition Parameters
Date_ 20211206
Time 14.58
INSTRUM spect
PROBHD 5 mm PATXI 1H/
PULPROG zgpg30
TD 6536
SOLVENT CDCl3
NS 2048
DS 4
SWH 29761.904 Hz
FIDRES 0.454131 Hz
AQ 1.1010048 sec
RG 56.22
DW 16.800 usec
DE 6.50 usec
TE 303.0 K
D1 2.00000000 sec
D11 0.03000000 sec
TDO 1

===== CHANNEL f1 =====
SFO1 125.9077573 MHz
NUC1 13C
P1 9.23 usec
PLW1 244.00000000 W

===== CHANNEL f2 =====
SFO2 500.6783527 MHz
NUC2 1H
CPDPRG[2] waltz16
PCPD2 80.00 usec
PLW2 13.60000038 W
PLW12 0.08840500 W
PLW13 0.05657900 W

F2 - Processing parameters
SI 32768
SF 125.8951680 MHz
WDW EM
SSB 0
LB 1.00 Hz
GB 0
PC 1.40
```

<sup>19</sup>F NMR, CDCl<sub>3</sub>, 376 MHz

GR-21-60

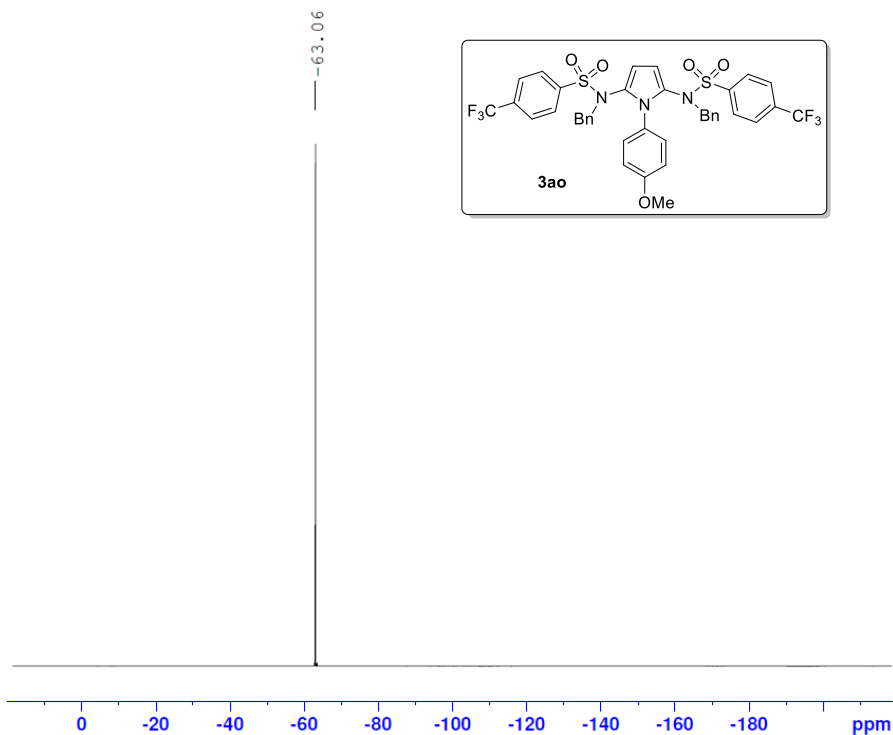

```
Current Data Parameters
NAME GR-21-60
EXPNO 350
PROCNO 1

F2 - Acquisition Parameters
Date_ 20211206
Time 18.10
INSTRUM spect
PROBHD 5 mm PABBO BB/
PULPROG zgfhigqn.2
TD 131072
SOLVENT CDCl3
NS 16
DS 4
SWH 89285.711 Hz
FIDRES 0.681196 Hz
AQ 0.7340032 sec
RG 201.48
DW 5.600 usec
DE 6.50 usec
TE 300.0 K
D1 1.00000000 sec
D11 0.03000000 sec
D12 0.00002000 sec
TDO 1

===== CHANNEL f1 =====
SFO1 376.4894122 MHz
NUC1 19F
P1 15.00 usec
PLW1 21.00000000 W

===== CHANNEL f2 =====
SFO2 400.1621006 MHz
NUC2 1H
CPDPRG[2] waltz16
PCPD2 90.00 usec
PLW2 13.00000000 W
PLW12 0.27963999 W

F2 - Processing parameters
SI 65536
SF 376.5270650 MHz
WDW EM
SSB 0
LB 0.30 Hz
GB 0
PC 1.00
```



Sample Name HRMS22121JAN29 Position Vial 29 Instrument Name Instrument 1 User Name  
 Inj Vol 1 InjPosition Instrument 1 Sample IRM Calibration Status Some Ions Missed  
 Data Filename BK-01.d ACQ Method ISOCRATIC.m Comment Acquired Time 1/21/2022 12:51:08 PM

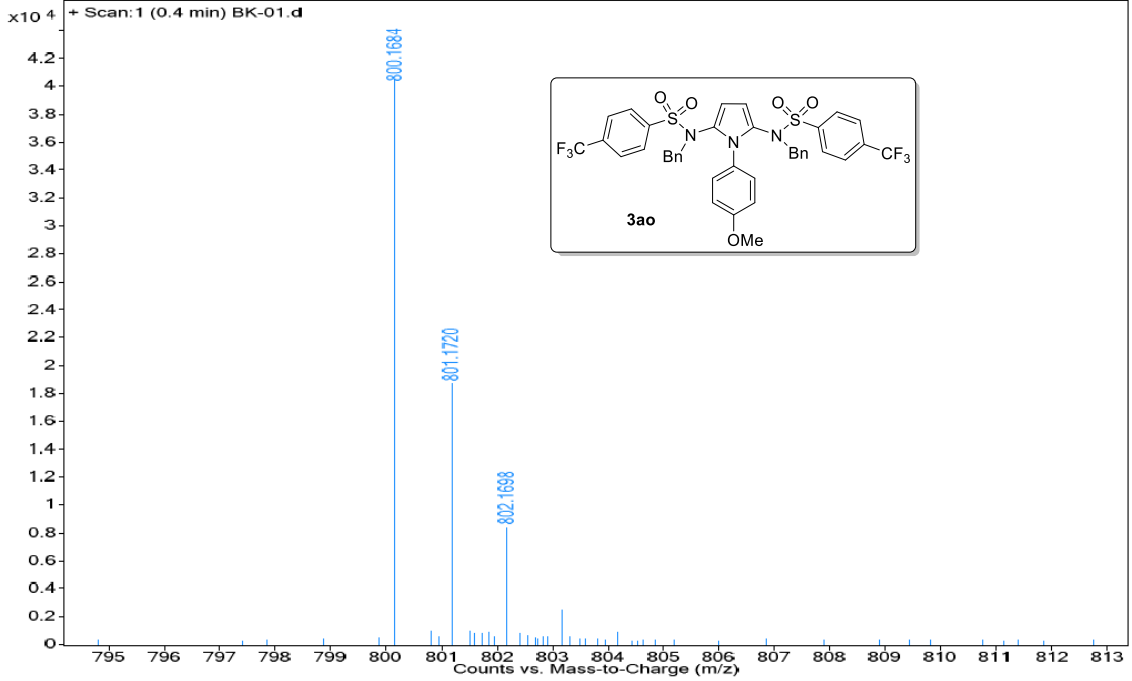

<sup>1</sup>H NMR, CDCl<sub>3</sub>, 400 MHz

SH 21 7.297  
 7.294  
 7.286  
 7.280  
 7.260  
 7.227  
 7.218  
 7.208  
 7.202  
 6.014  
 4.675  
 2.857

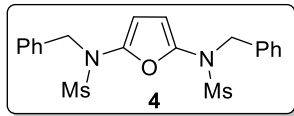

Current Data Parameters  
 NAME Desktop  
 EXPNO 440  
 PROCNO 1  
 F2 - Acquisition Parameters  
 Date\_ 20220104  
 Time 12.07  
 INSTRUM spect  
 PROBHD 5 mm PABBO BB/  
 PULPROG zg30  
 TD 65536  
 SOLVENT CDCl3  
 NS 8  
 DS 0  
 SWH 9615.385 Hz  
 FIDRES 0.146719 Hz  
 AQ 3.4078720 sec  
 RG 129.57  
 DW 52.000 usec  
 DE 6.50 usec  
 TE 300.0 K  
 D1 1.0000000 sec  
 TDO 1  
 ----- CHANNEL f1 -----  
 SF01 400.1629712 MHz  
 NUC1 1H  
 P1 13.20 usec  
 PLW1 13.0000000 W  
 F2 - Processing parameters  
 SI 65536  
 SF 400.1603097 MHz  
 WDW EM  
 SSB 0  
 LB 0.30 Hz  
 GB 0  
 PC 1.00

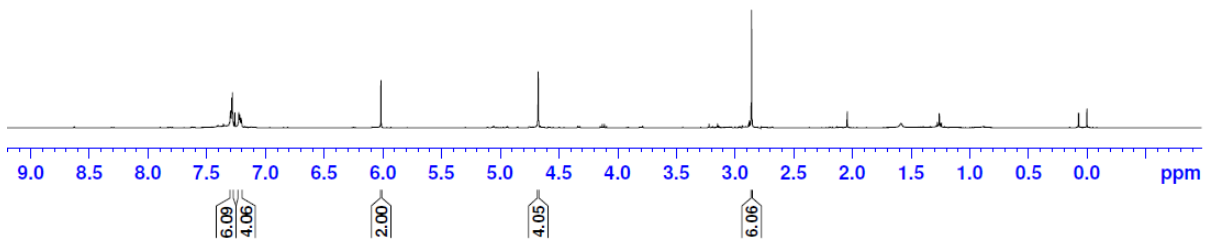

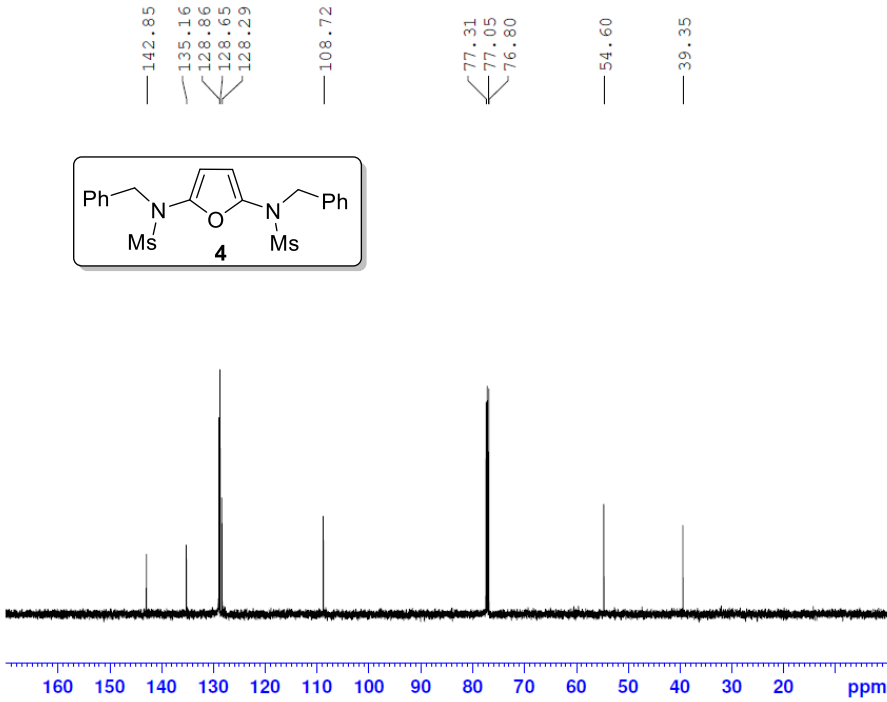

```

Current Data Parameters
NAME      SH-21-09
EXPNO    520
PROCNO    1

F2 - Acquisition Parameters
Date_    20220105
Time     13.26
INSTRUM  spect
PROBHD   5 mm PATXI 1H/
PULPROG  zgpg30
TD       65536
SOLVENT  CDCl3
NS       2048
DS       0
SWH      29761.904 Hz
FIDRES   0.454131 Hz
AQ       1.1010048 sec
RG       107.78
DW       16.800 usec
DE       6.50 usec
TE       300.0 K
D1       2.00000000 sec
D11      0.03000000 sec
TDO      1

===== CHANNEL f1 =====
SFO1     125.9077573 MHz
NUC1     13C
P1       9.23 usec
PLW1     244.0000000 W

===== CHANNEL f2 =====
SFO2     500.6783527 MHz
NUC2     1H
CPDPRG[2] waltz16
PCPD2    80.00 usec
PLW2     13.60000038 W
PLW12    0.08840500 W
PLW13    0.05657900 W

F2 - Processing parameters
SI       32768
SF       125.8951680 MHz
WDW      EM
SSB      0
LB       1.00 Hz
GB       0
FC       1.40
  
```

| Sample Name   | HRMS22121JAN30 | Position    | Vial 30     | Instrument Name | Instrument 1 | User Name              |                       |
|---------------|----------------|-------------|-------------|-----------------|--------------|------------------------|-----------------------|
| Inj Vol       | 1              | InjPosition |             | SampleType      | Sample       | IRM Calibration Status | Some Ions Missed      |
| Data Filename | BK-02.d        | ACQ Method  | ISOCRATIC.m | Comment         |              | Acquired Time          | 1/21/2022 12:54:19 PM |

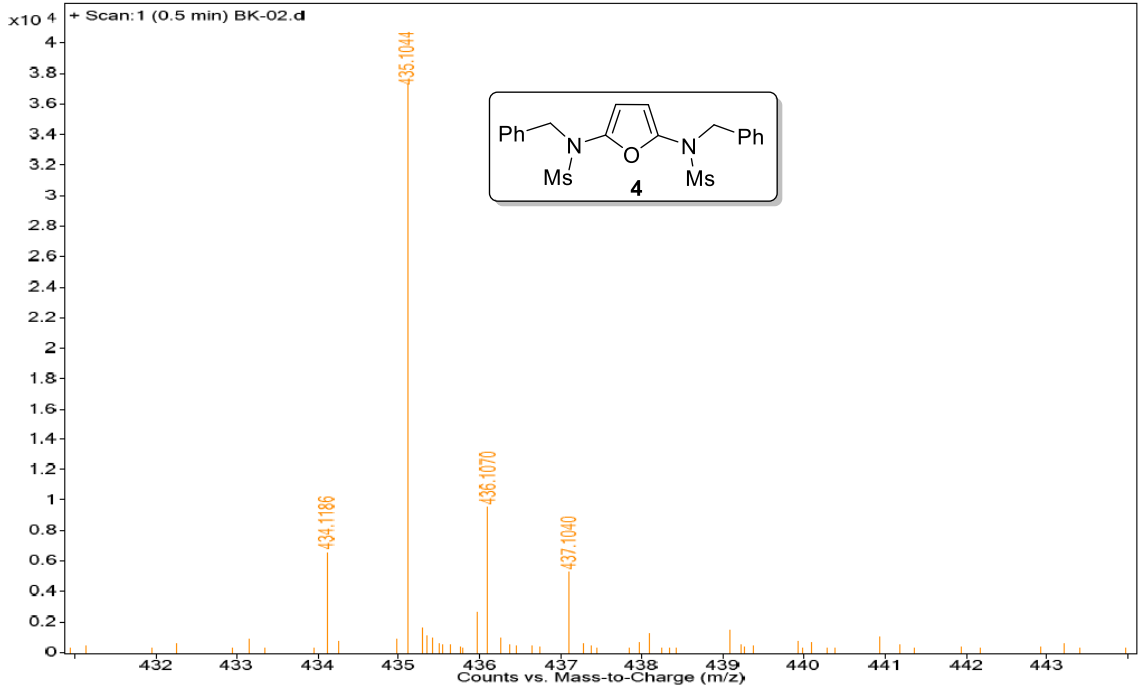

<sup>1</sup>H NMR, CDCl<sub>3</sub>, 400 MHz

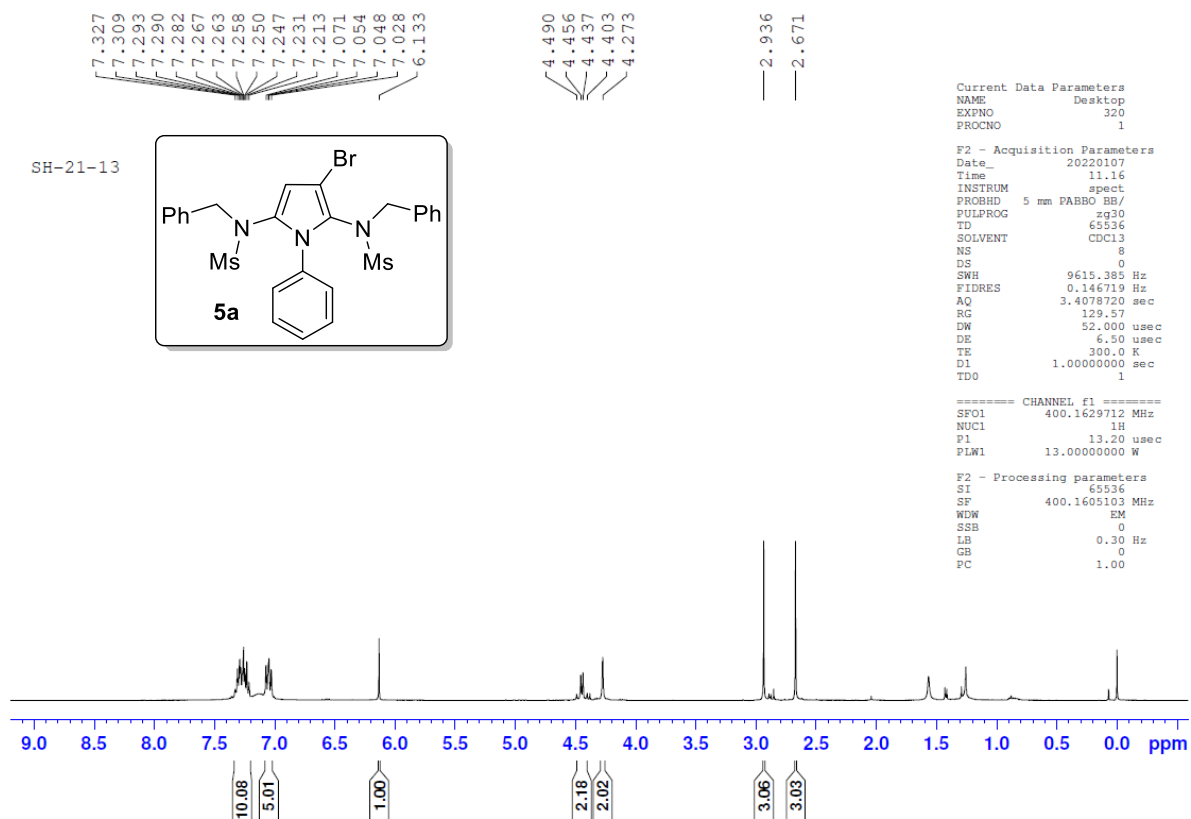

SH 21 13

<sup>13</sup>C NMR, CDCl<sub>3</sub>, 125 MHz

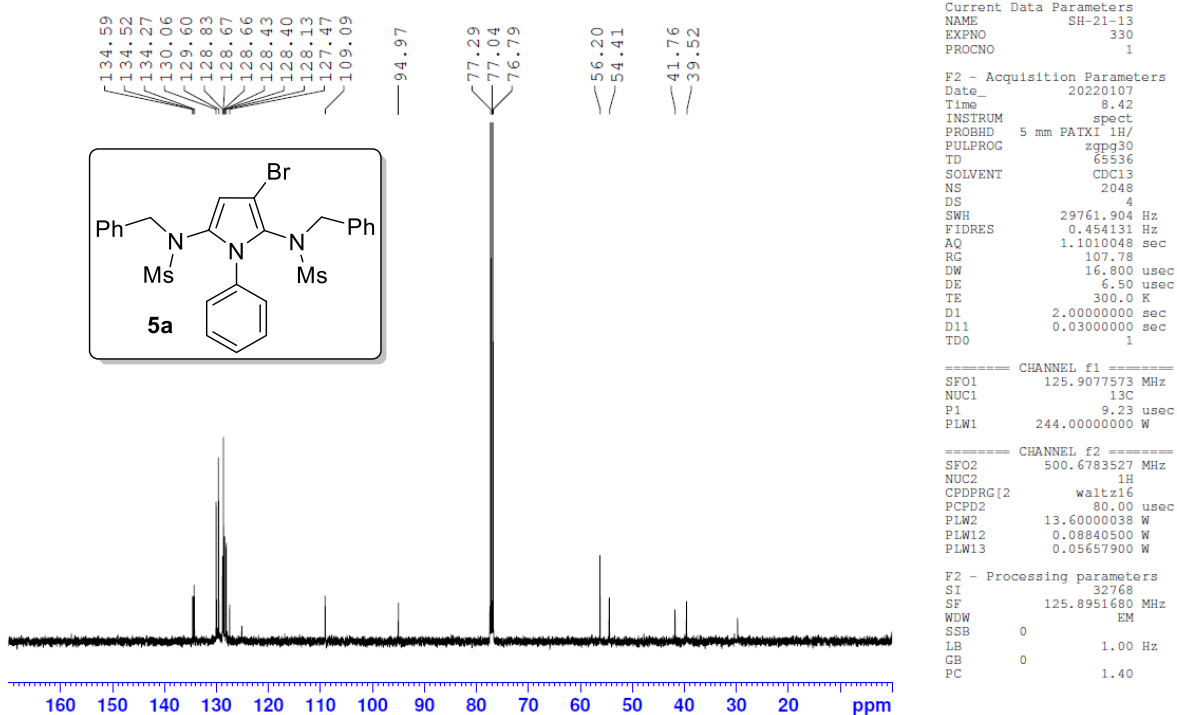

|               |                |             |             |                 |              |                        |                       |
|---------------|----------------|-------------|-------------|-----------------|--------------|------------------------|-----------------------|
| Sample Name   | HRMS22128JAN23 | Position    | Vial 23     | Instrument Name | Instrument 1 | User Name              |                       |
| Inj Vol       | 1              | InjPosition |             | SampleType      | Sample       | IRM Calibration Status | Some Ions Missed      |
| Data Filename | BK-06.d        | ACQ Method  | ISOCRATIC.m | Comment         |              | Acquired Time          | 1/28/2022 12:45:37 PM |

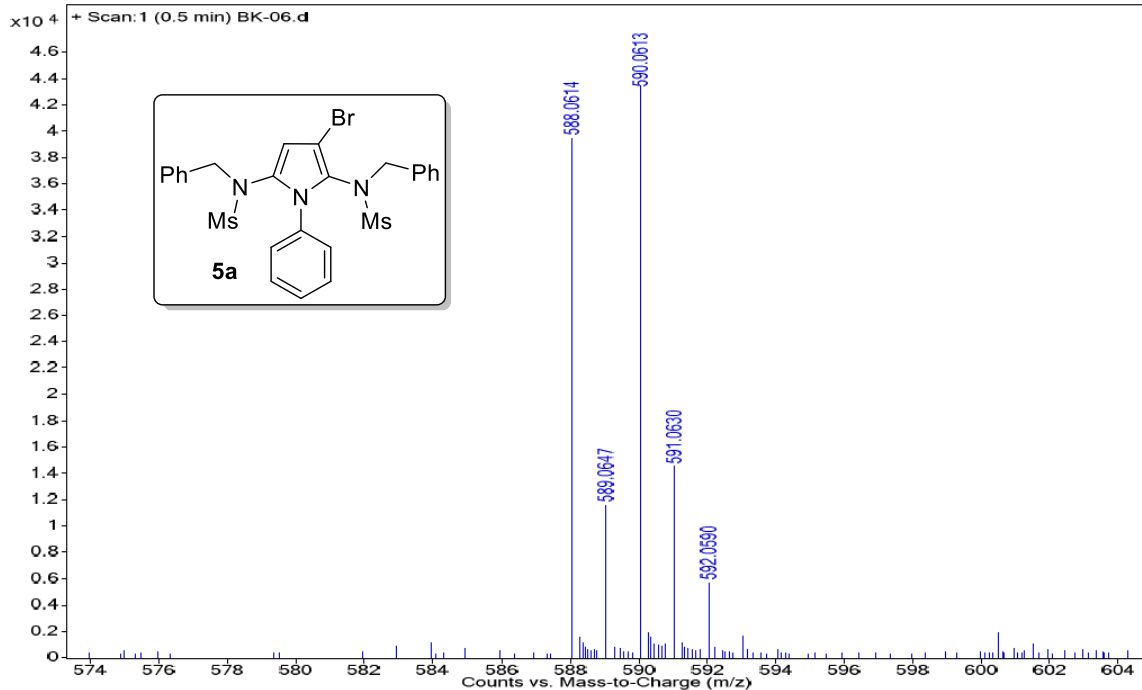

SH 21 18B

<sup>1</sup>H NMR, CDCl<sub>3</sub>, 400 MHz

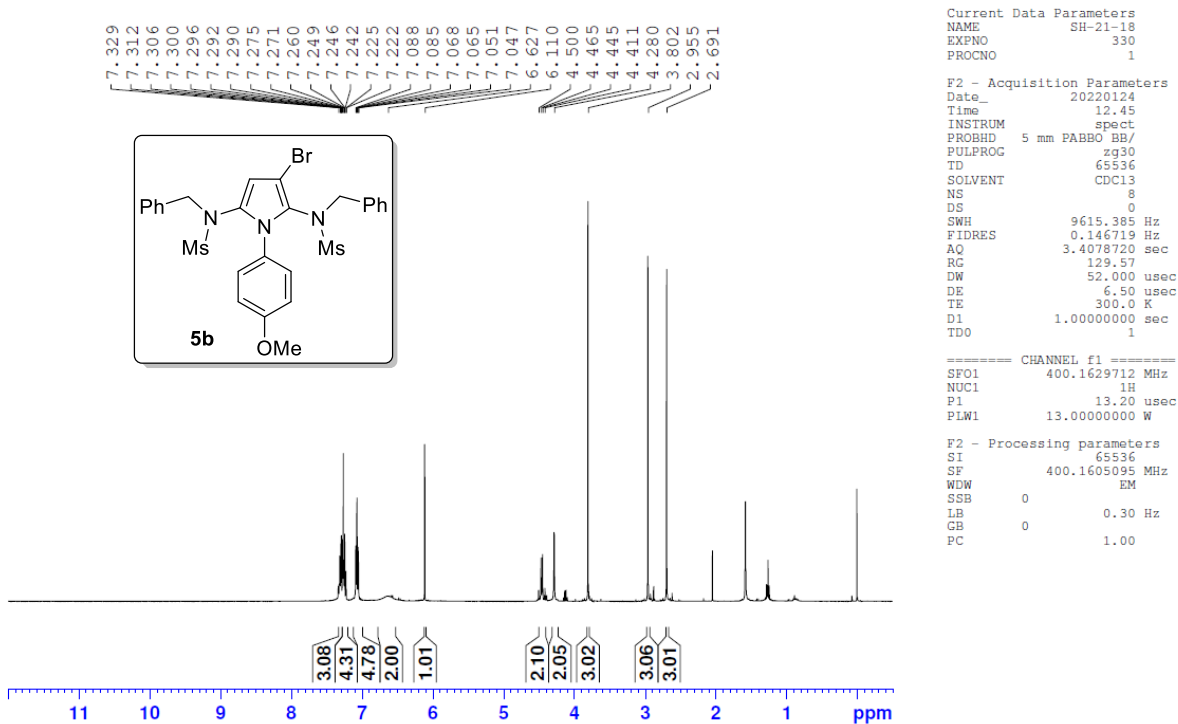

<sup>13</sup>C NMR, CDCl<sub>3</sub>, 125 MHz

SH 21 18B

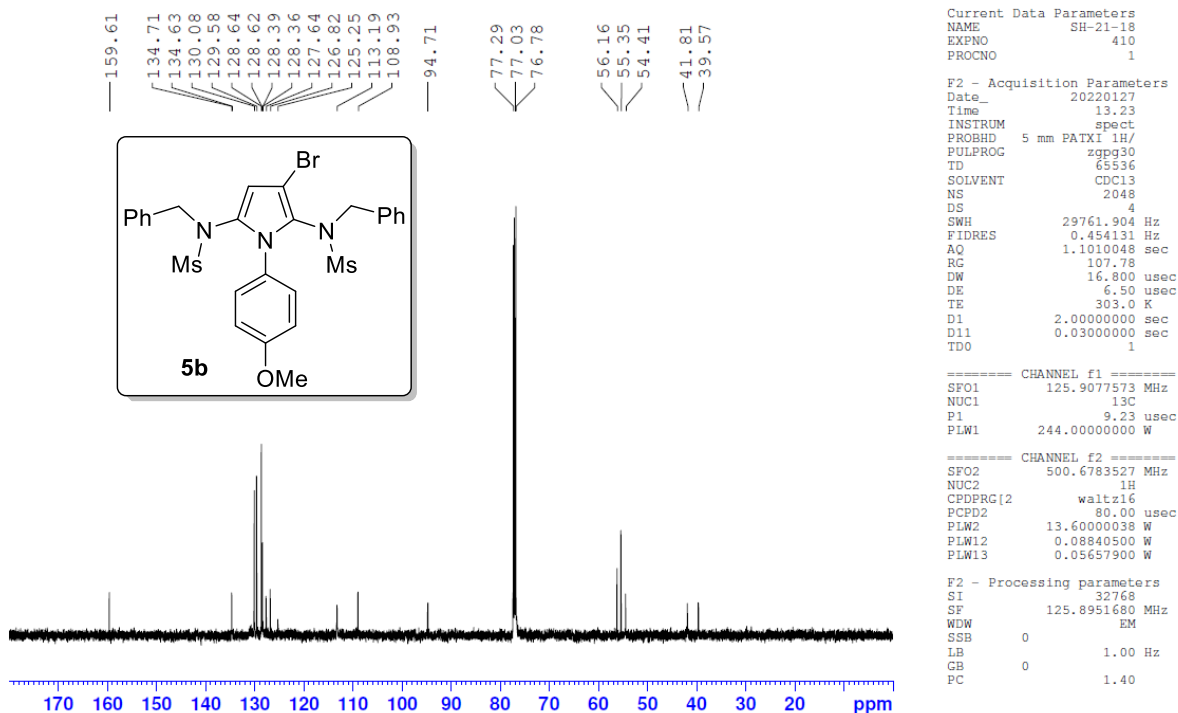

| Sample Name   | HRMS22125JAN24 | Position    | Vial 24     | Instrument Name | Instrument 1 | User Name              |
|---------------|----------------|-------------|-------------|-----------------|--------------|------------------------|
| Inj Vol       | 1              | InjPosition |             | SampleType      | Sample       | IRM Calibration Status |
| Data Filename | NG-20-121.d    | ACQ Method  | ISOCRATIC.m | Comment         |              | Some Ions Missed       |
|               |                |             |             |                 |              | Acquired Time          |

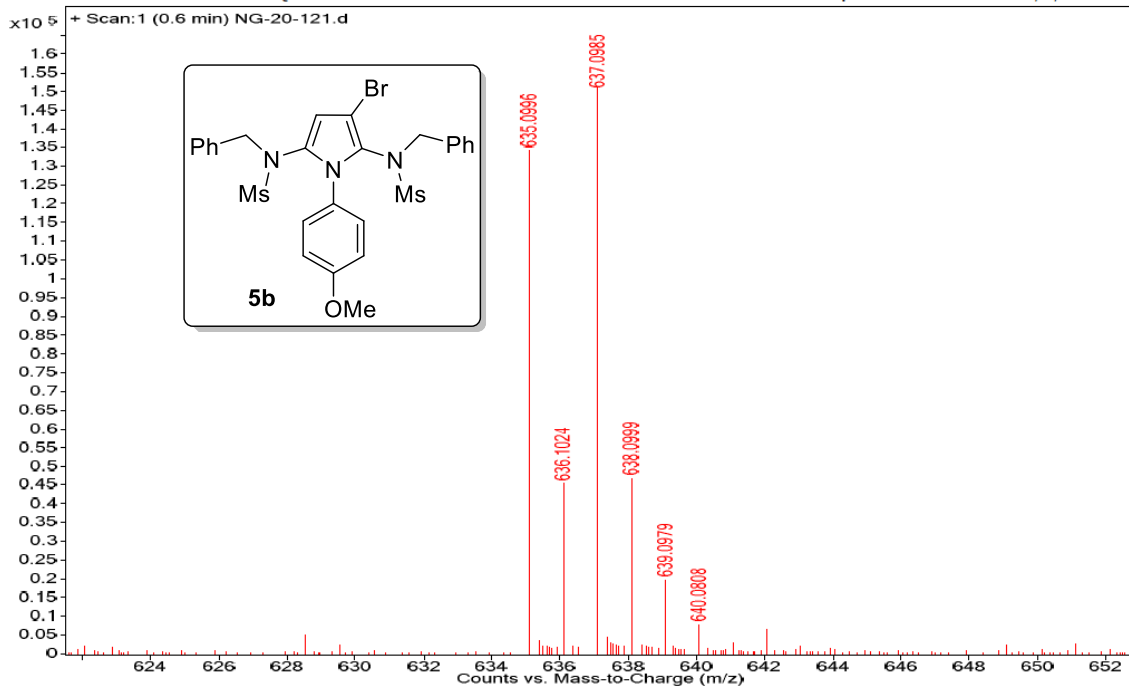

SH-21-06

 $^1\text{H}$  NMR,  $\text{CDCl}_3$ , 400 MHz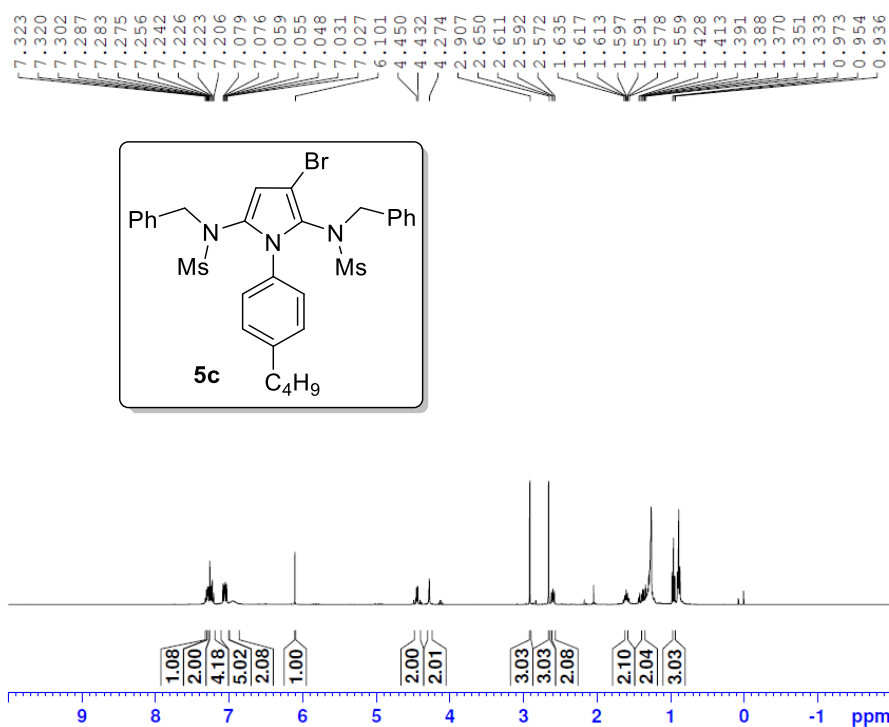

SH 21 06

 $^{13}\text{C}$  NMR,  $\text{CDCl}_3$ , 125 MHz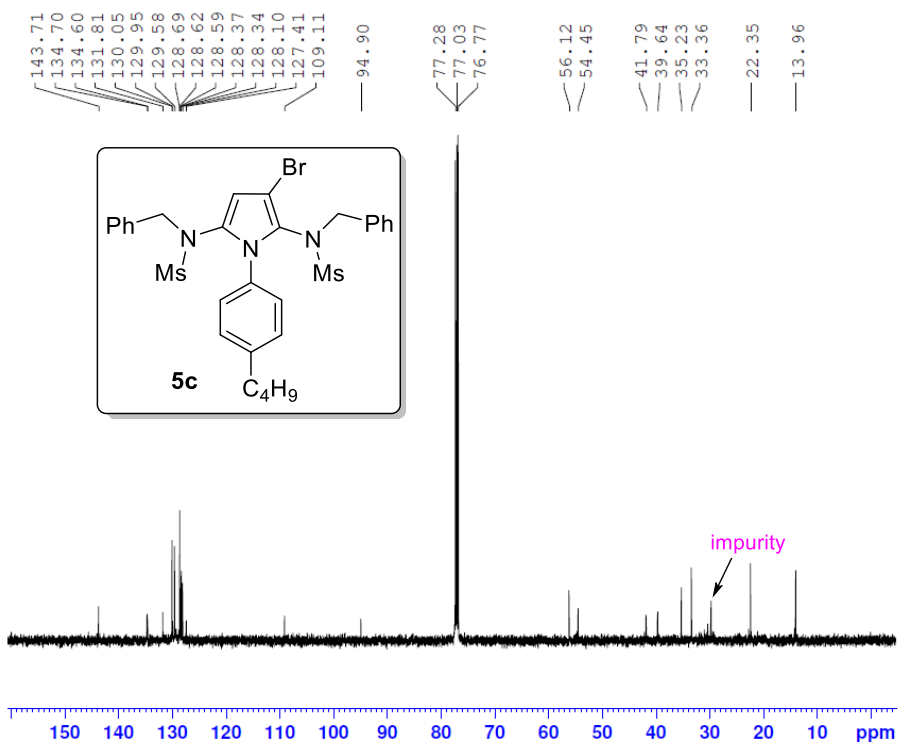

Sample Name HRMS22128JAN24 Position Vial 24 Instrument Name Instrument 1 User Name  
 Inj Vol 1 InjPosition Sample SampleType Sample IRM Calibration Status Some Ions Missed  
 Data Filename BK-07.d ACQ Method ISOCRATIC.m Comment Acquired Time 1/28/2022 12:48:44 PM

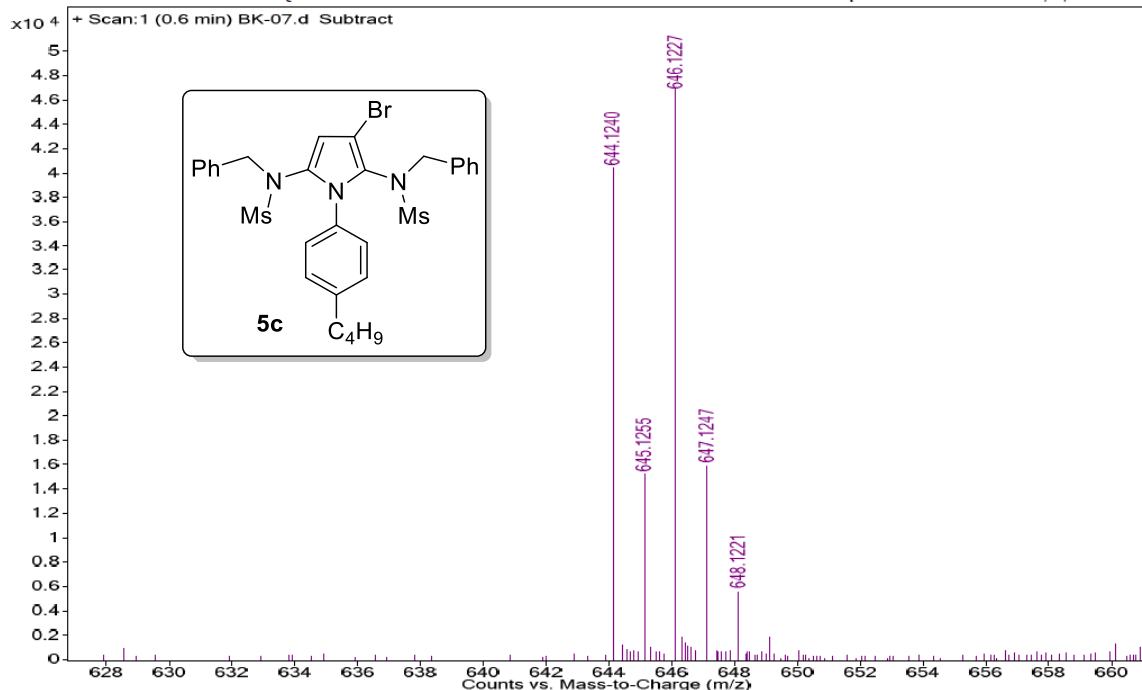

SH-21-03

<sup>1</sup>H NMR, CDCl<sub>3</sub>, 400 MHz

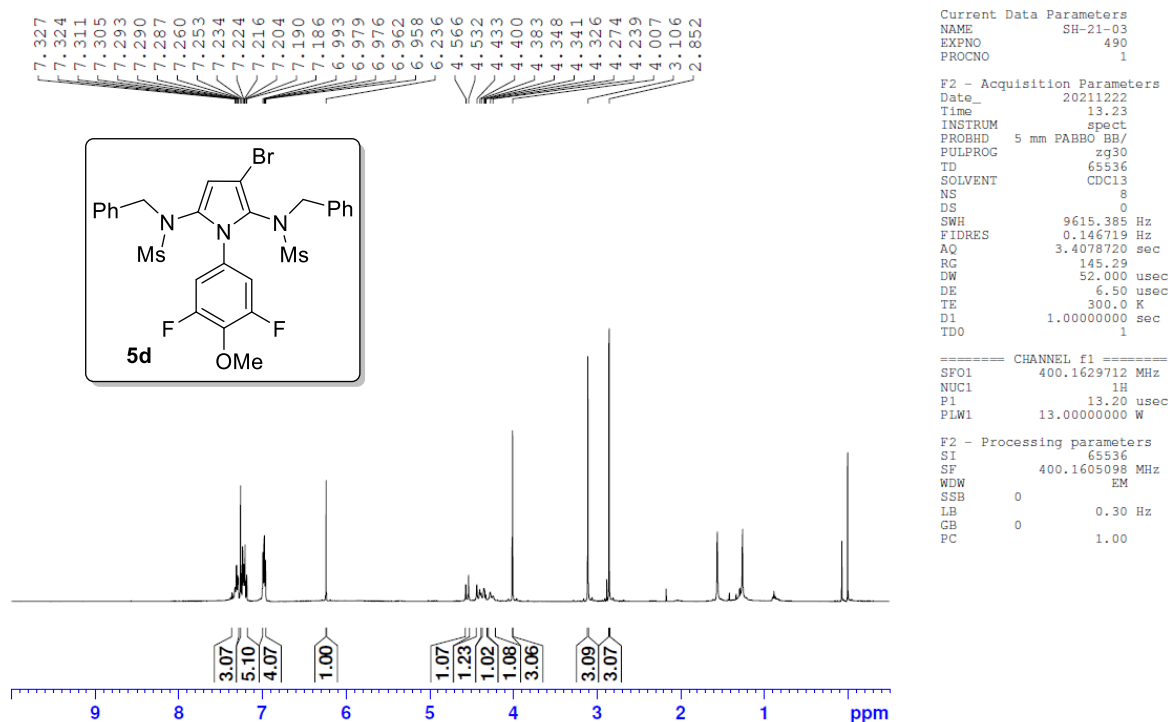

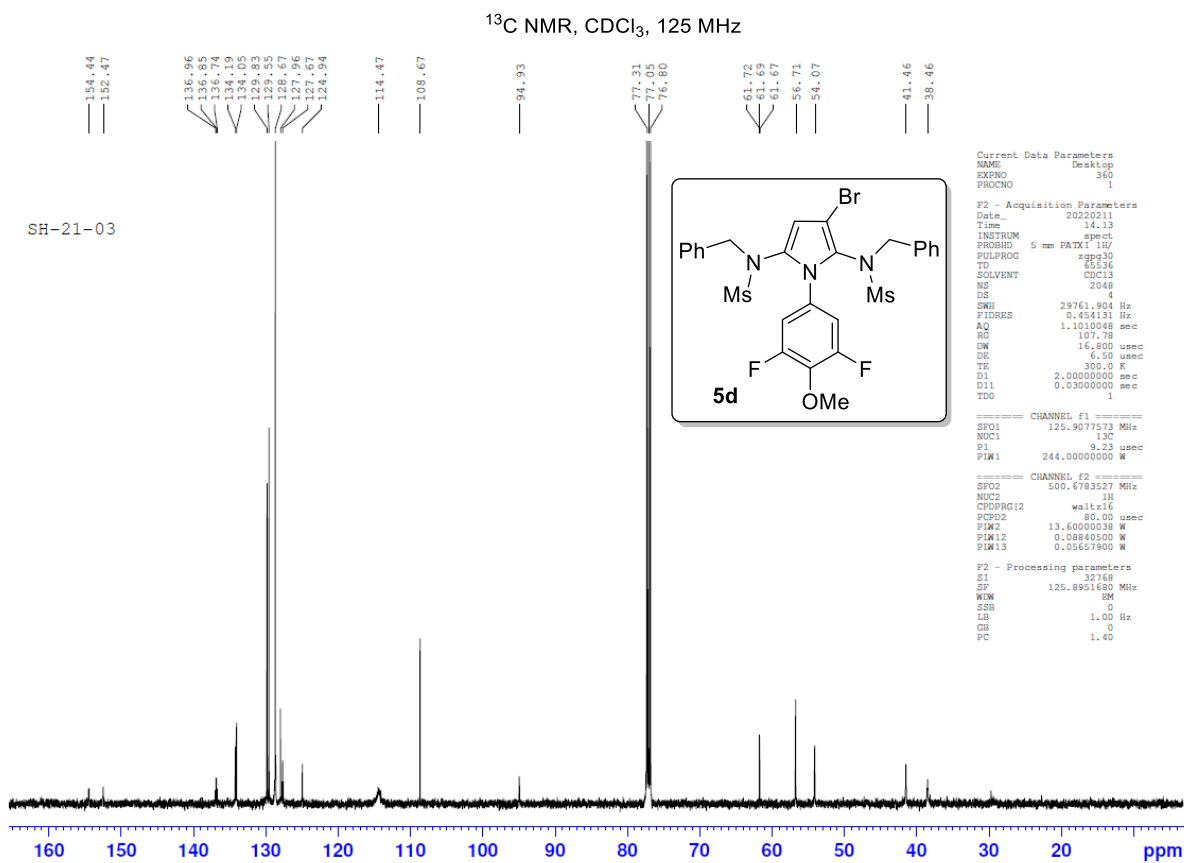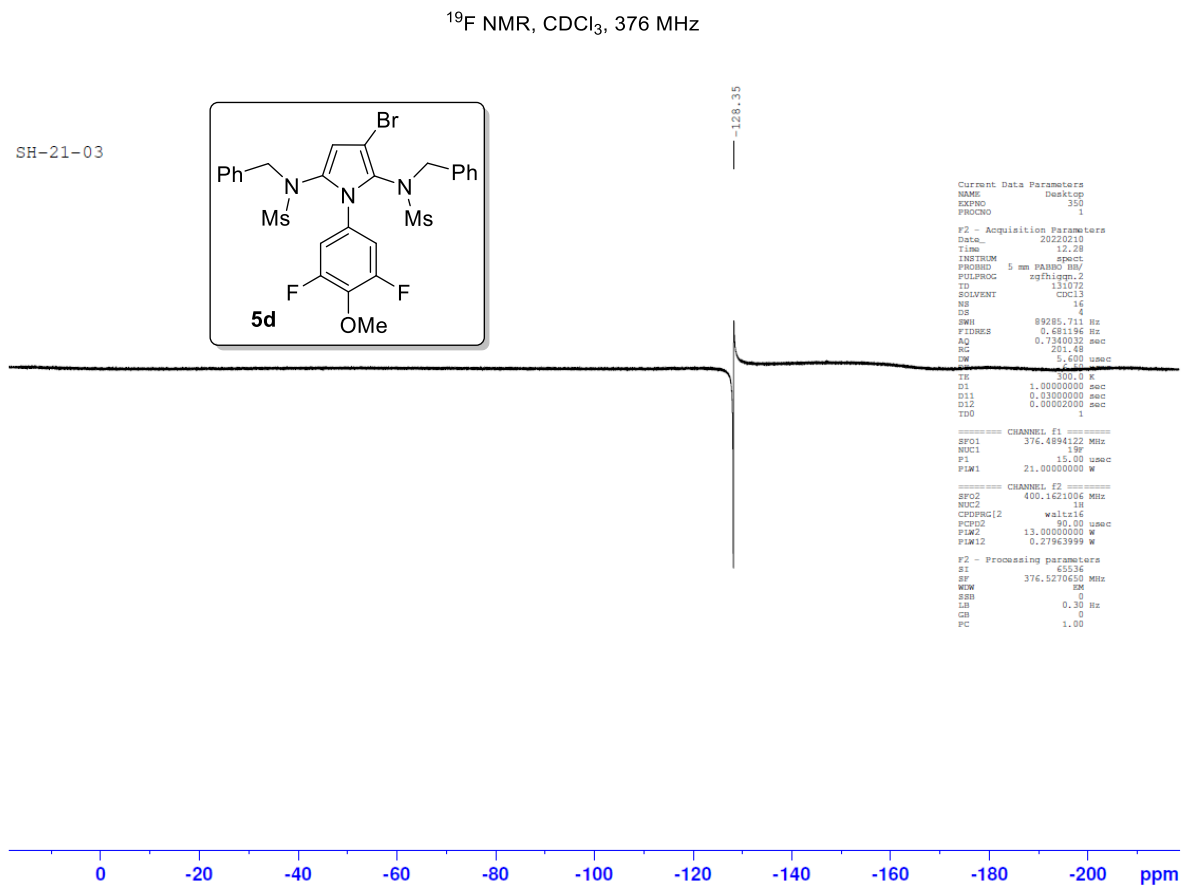



Sample Name HRMS22I21FEB20 Position Vial 20 Instrument Name Instrument 1 User Name  
 Inj Vol 1 InjPosition SampleType Sample IRM Calibration Status Some Ions Missed  
 Data Filename GR-22-19.d ACQ Method ISOCRATIC.m Comment Acquired Time 2/21/2022 12:34:10 PM

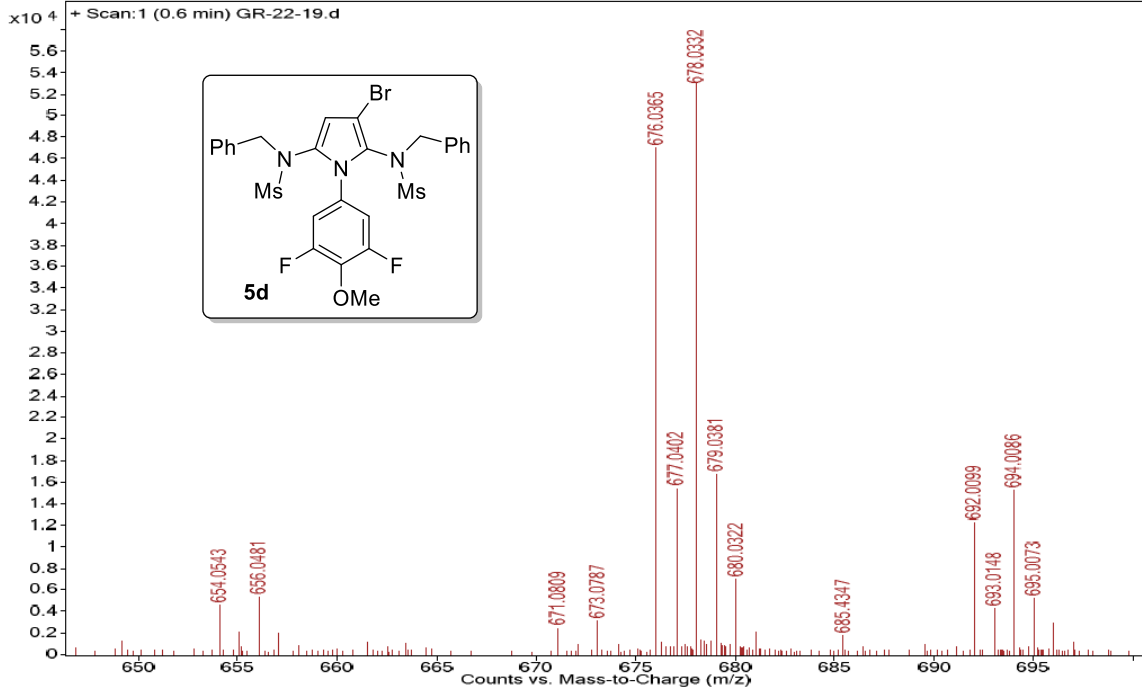

GR SH 04

<sup>1</sup>H NMR, CDCl<sub>3</sub>, 400 MHz

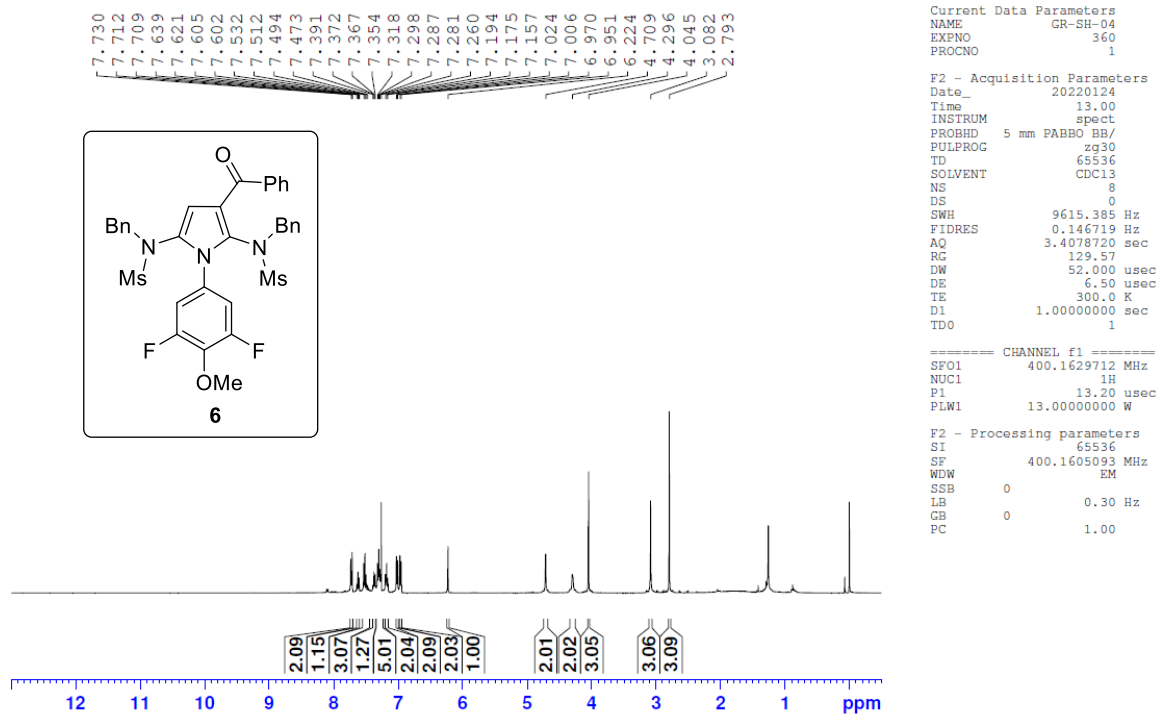

<sup>13</sup>C NMR, CDCl<sub>3</sub>, 101 MHz

GR-SH-04

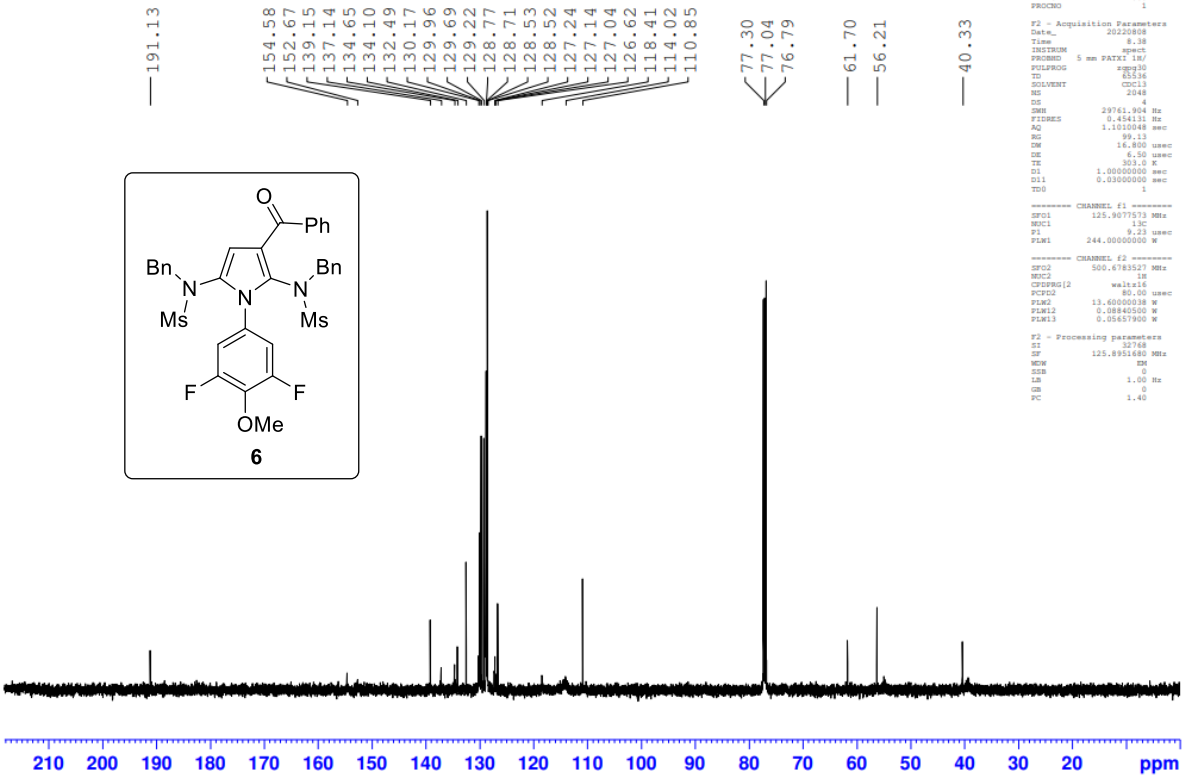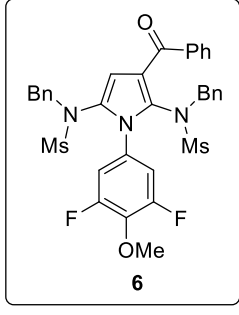

GR SH 04

<sup>19</sup>F NMR, CDCl<sub>3</sub>, 376 MHz

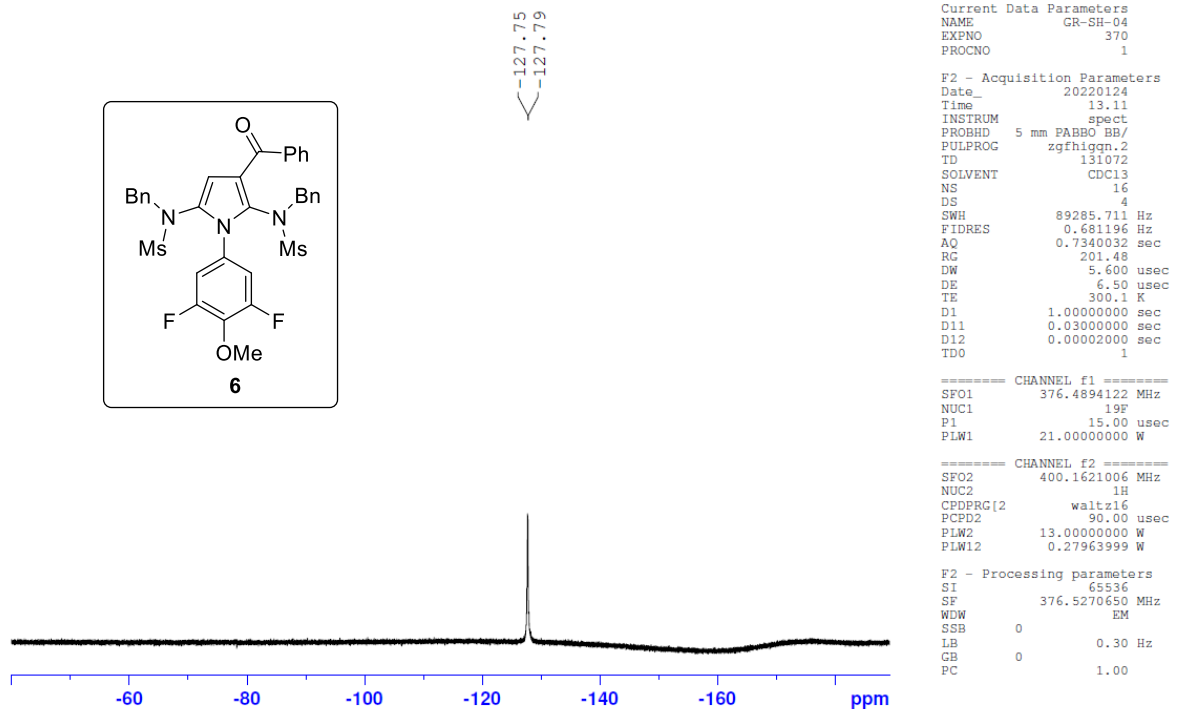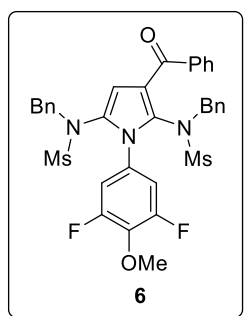

Sample Name HRMS22125JAN23 Position Vial 23 Instrument Name Instrument 1 User Name  
 Inj Vol 1 InjPosition Sample Sample IRM Calibration Status Some Ions Missed  
 Data Filename NG-20-131.d ACQ Method ISOCRATIC.m Comment Acquired Time 1/25/2022 12:44:05 PM

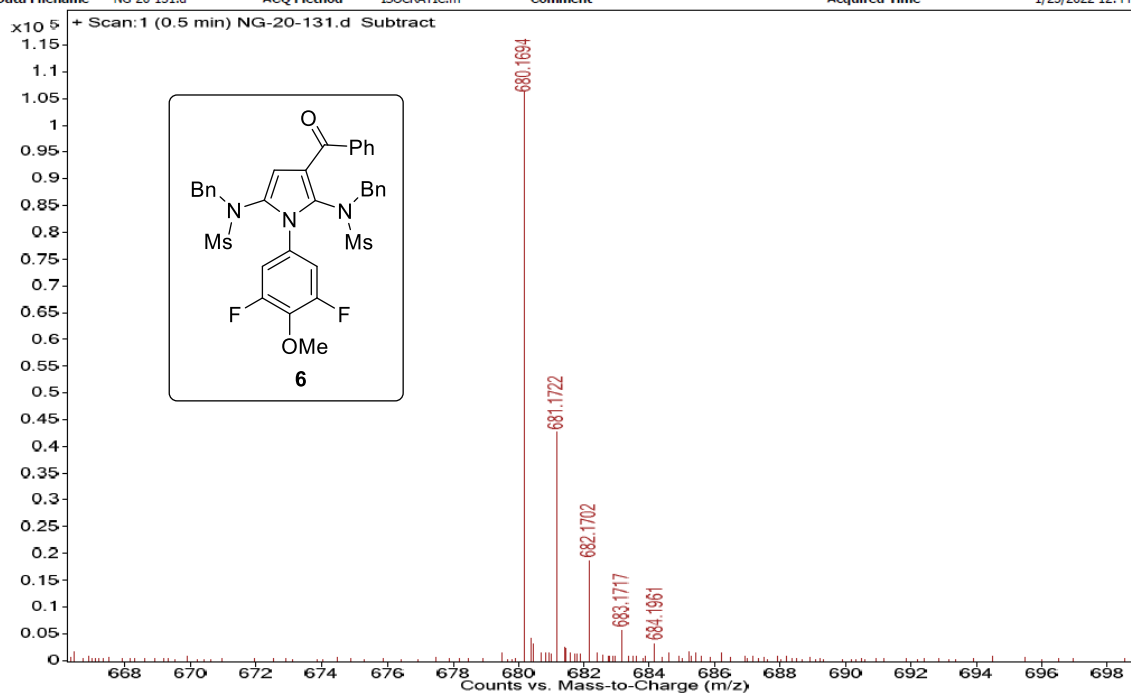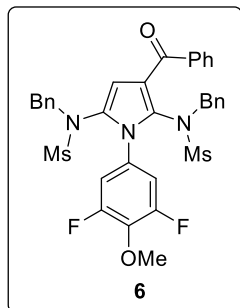

<sup>1</sup>H NMR, CDCl<sub>3</sub>, 400 MHz

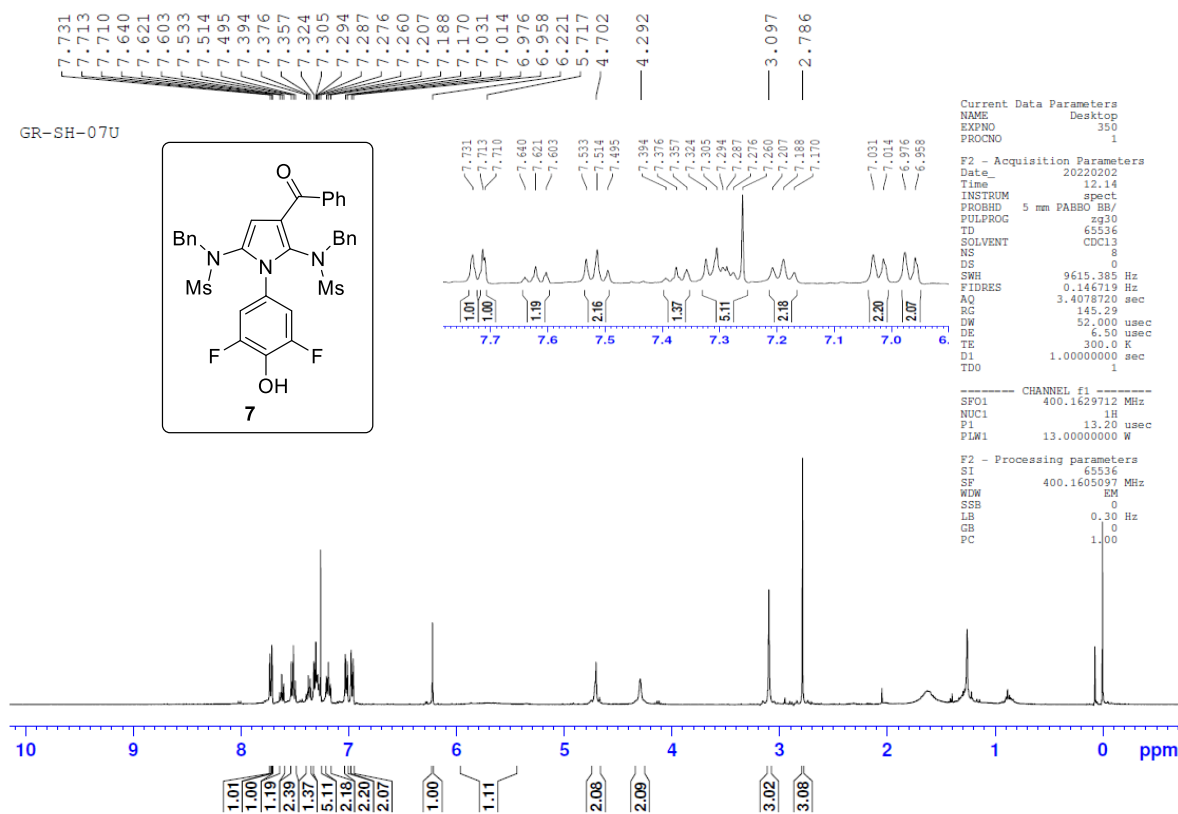

$^{13}\text{C}$  NMR,  $d_6$ -DMSO, 101 MHz

GR-SH-07

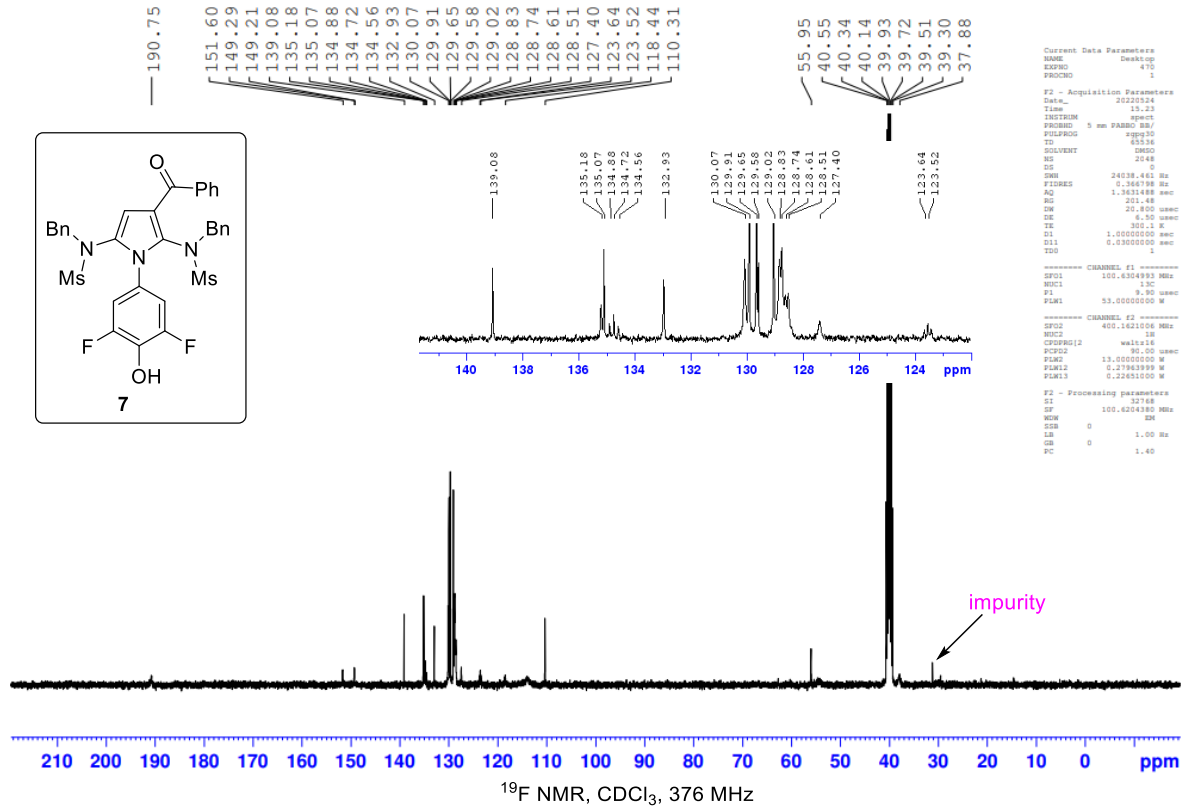

GR-SH-07U

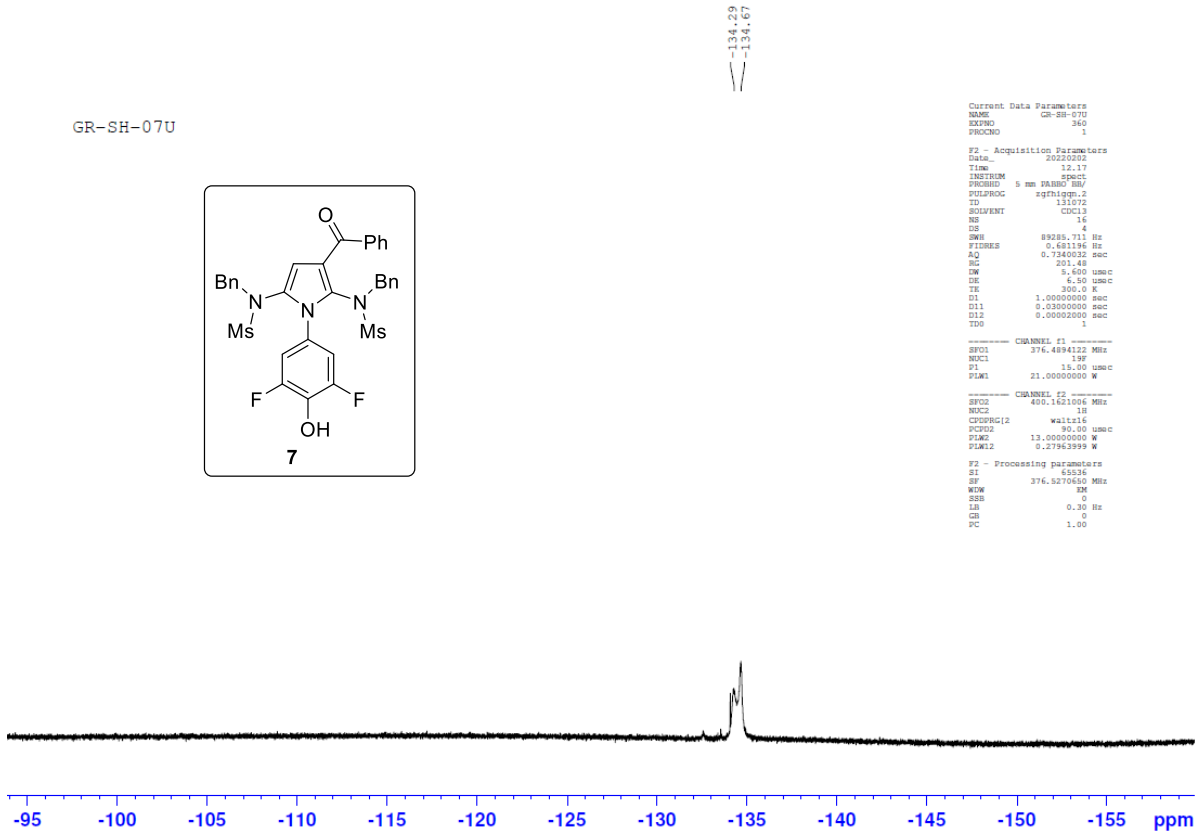

Sample Name HRMS22I21FEB19 Position Vial 19 Instrument Name Instrument 1 User Name  
 Inj Vol 1 InjPosition Sample Instrument 1  
 Data Filename GR-22-ST.d ACQ Method ISOCRATIC.m Comment Sample IRM Calibration Status Some Ions Missed  
 Acquired Time 2/21/2022 12:31:31 PM

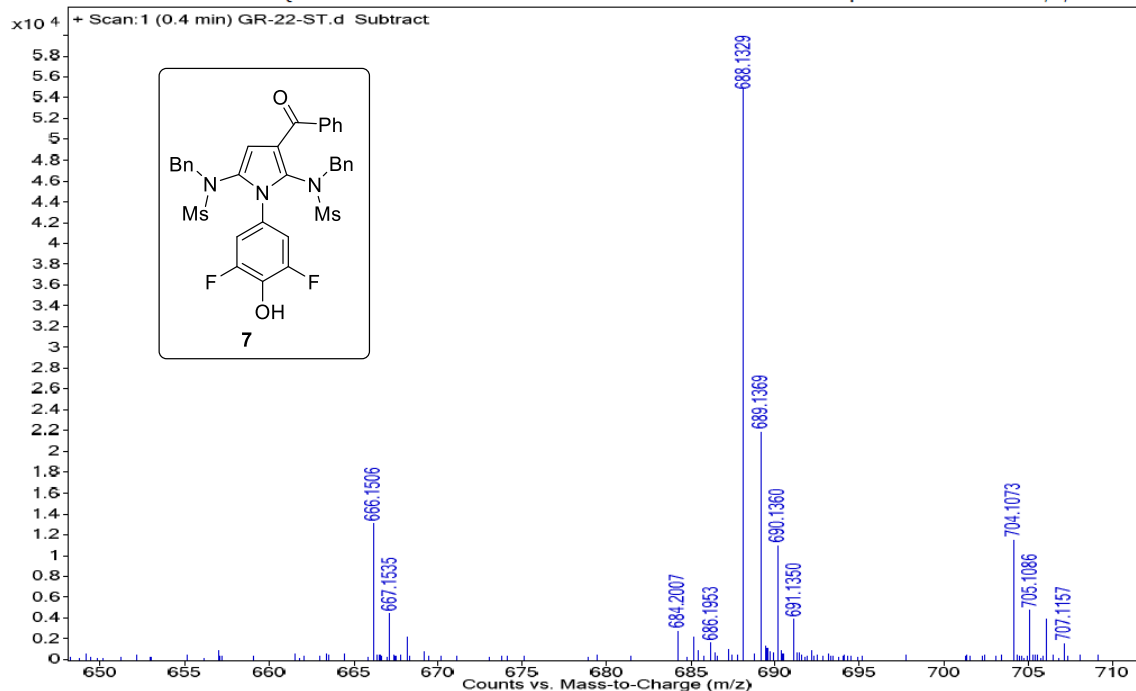

<sup>1</sup>H NMR, CDCl<sub>3</sub>, 400 MHz

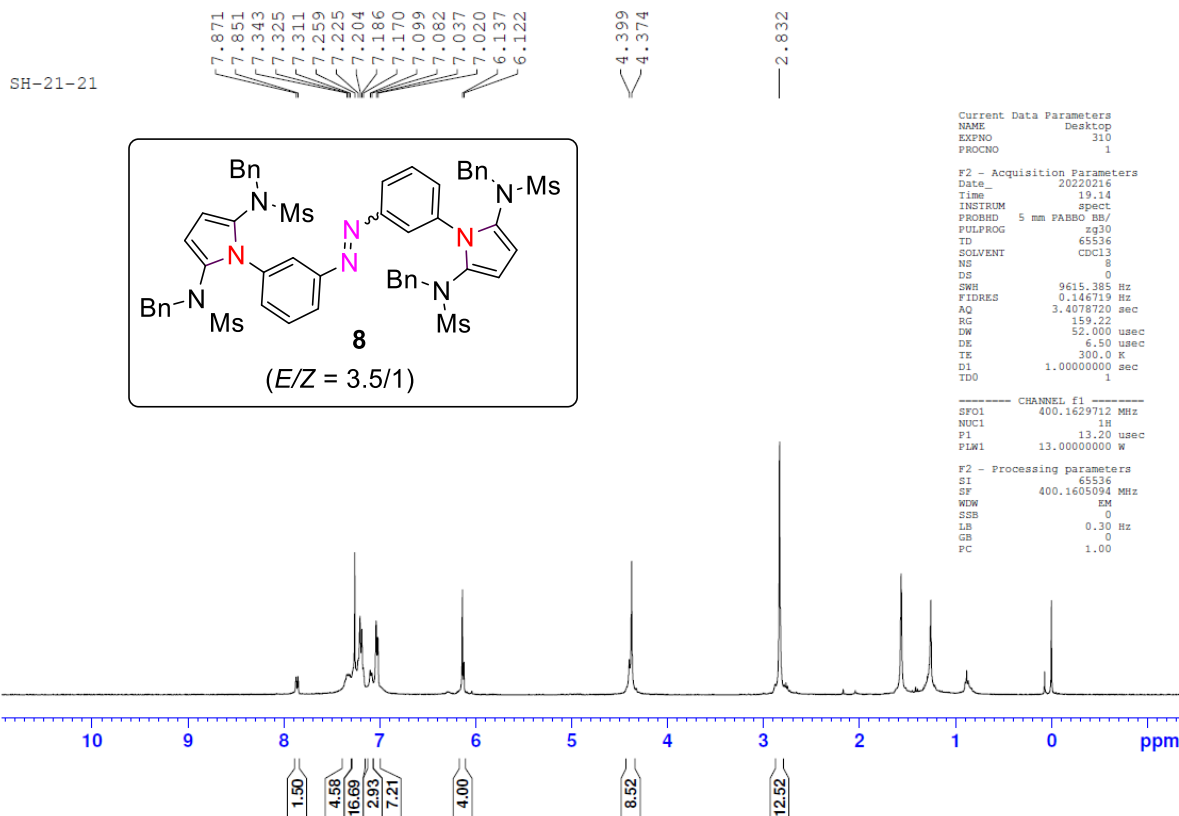

<sup>13</sup>C NMR, CDCl<sub>3</sub>, 125 MHz

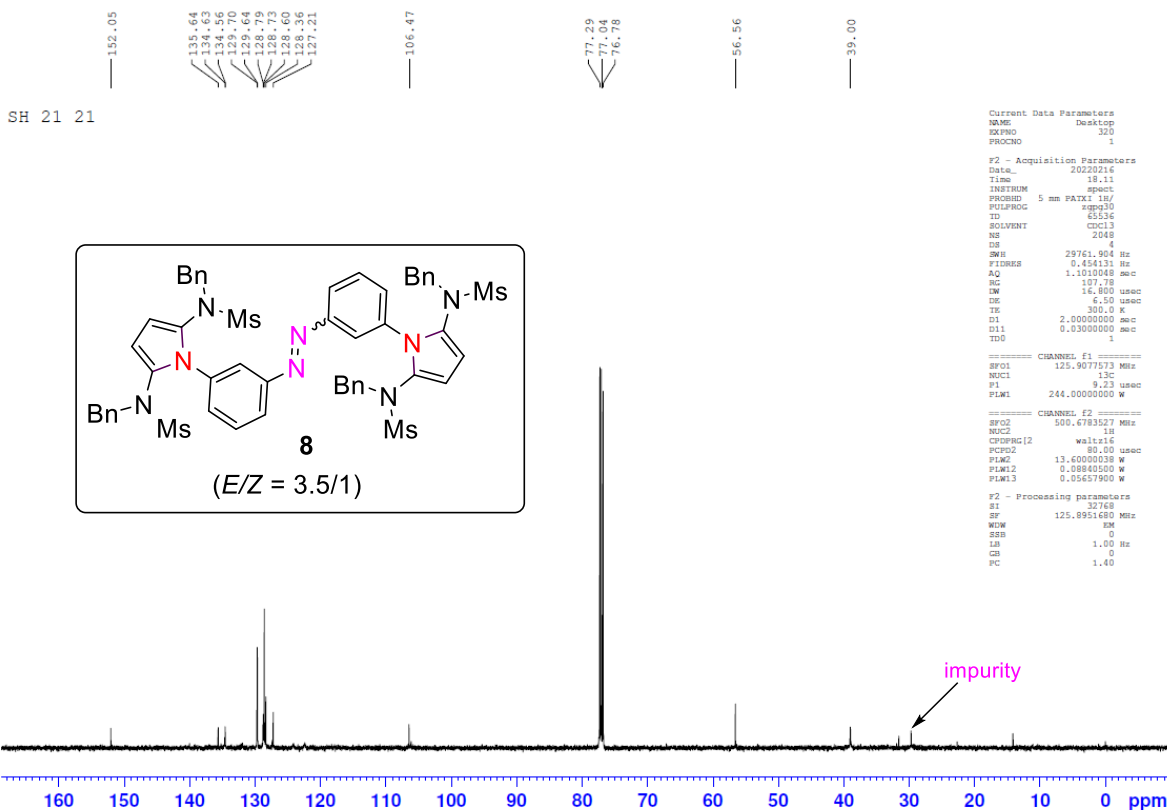

| Sample Name   | HRMS22111FEB26 | Position    | Vial 26     | Instrument Name | Instrument 1 | User Name     | IRM Calibration Status | Some Ions Missed      |
|---------------|----------------|-------------|-------------|-----------------|--------------|---------------|------------------------|-----------------------|
| Inj Vol       | 1              | InjPosition |             | SampleType      | Sample       | Acquired Time |                        | 2/11/2022 12:56:40 PM |
| Data Filename | SH-21-10.d     | ACQ Method  | ISOCRATIC.m | Comment         |              |               |                        |                       |

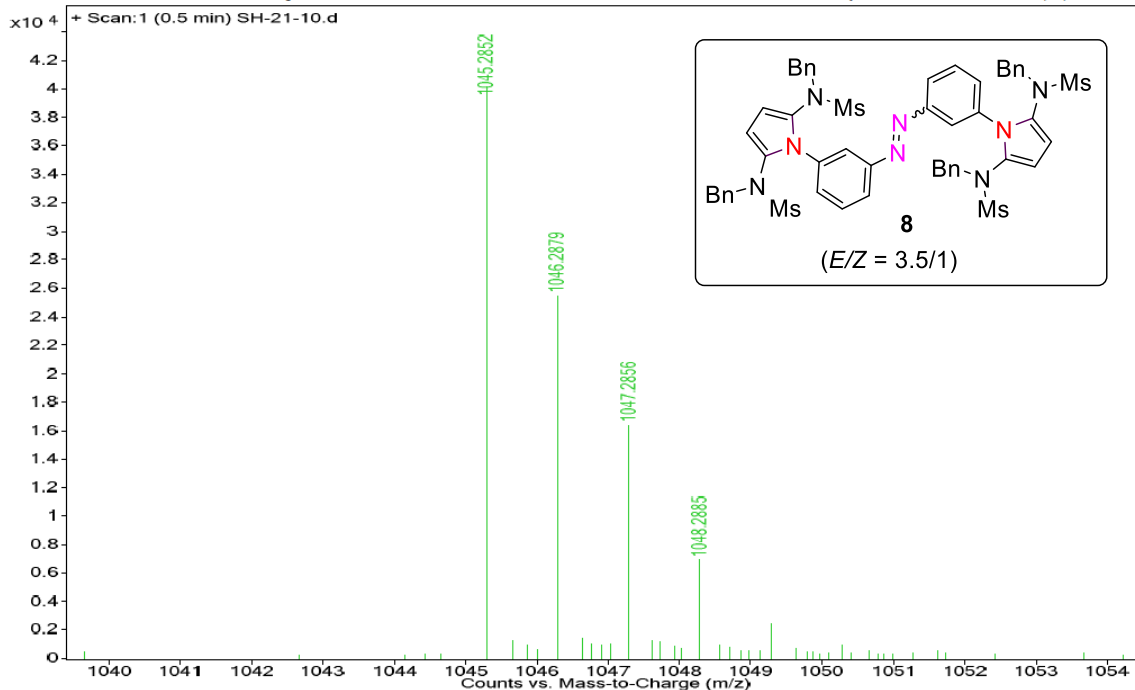

Supplement: d2ob01458k1.pdf [file d2ob01458k1.pdf]
